# Supplementary material for: Characterization of a MERS-like betacoronavirus in Danish brown long-eared bats (Plecotus auritus)
Source: Research Square preprint supplement (doi:10.21203/rs.3.rs-6428107/v1), 2025-04-29
Supplement: Supplementary file 1 [file 7778fa6929fbe19bfc48fdb9.xlsx]

## Sheet: S1_sampling
Bat Species	No. Sampled	pan-Cov positive	Collection	Location	Sample Types
Pipistrellus pygmaeus	6	1	Aug. 2020	Zealand	5 individual and 1 from floor
Myotis nattereri	2	0	Aug-Sep. 2020	Bornholm, Zealand	Individual
Myotis mystacinus	1	0	Sept. 2020	Bornholm	1 from nest box
Myotis bechsteinii	3	0	Sept. 2020	Bornholm	Individual
Plecotus auritus	3	2	Sept. 2020	Bornholm	2 individuals and 1 from nest box
Eptesicus serotinus	4	0	Aug. 2020	Zealand	4 from floor

## Sheet: S2_corona_db
accession	geo_location	viral_genus	viral_subgenus	viral_species	length	host	host_genus	host_species	common_name	collection_date	genbank_title	isolation_source	host_meta	source
EPI_ISL_410538	Asia / China / Guangxi	Betacoronavirus	Sarbecovirus	Severe acute respiratory syndrome coronavirus 2	29806	Manis javanica	Manis	javanica	Pangolins	2017-01-01	hCoV-19/pangolin/Guangxi/P4L/2017		Manis javanica	tan2023
EPI_ISL_410539	Asia / China / Guangxi	Betacoronavirus	Sarbecovirus	Severe acute respiratory syndrome coronavirus 2	29801	Manis javanica	Manis	javanica	Pangolins	2017-01-01	hCoV-19/pangolin/Guangxi/P1E/2017		Manis javanica	tan2023
EPI_ISL_410540	Asia / China / Guangxi	Betacoronavirus	Sarbecovirus	Severe acute respiratory syndrome coronavirus 2	29806	Manis javanica	Manis	javanica	Pangolins	2017-01-01	hCoV-19/pangolin/Guangxi/P5L/2017		Manis javanica	tan2023
EPI_ISL_410541	Asia / China / Guangxi	Betacoronavirus	Sarbecovirus	Severe acute respiratory syndrome coronavirus 2	29806	Manis javanica	Manis	javanica	Pangolins	2017-01-01	hCoV-19/pangolin/Guangxi/P5E/2017		Manis javanica	tan2023
EPI_ISL_410542	Asia / China / Guangxi	Betacoronavirus	Sarbecovirus	Severe acute respiratory syndrome coronavirus 2	29795	Manis javanica	Manis	javanica	Pangolins	2017-01-01	hCoV-19/pangolin/Guangxi/P2V/2017		Manis javanica	tan2023
EPI_ISL_410544	Asia / China / Guangdong	Betacoronavirus	Sarbecovirus	Severe acute respiratory syndrome coronavirus 2	29769	Manis javanica	Manis	javanica	Pangolins	2019-01-01	hCoV-19/pangolin/Guangdong/P2S/2019		Manis javanica	tan2023
EPI_ISL_410721	Asia / China / Guangdong	Betacoronavirus	Sarbecovirus	Severe acute respiratory syndrome coronavirus 2	29825	Manis javanica	Manis	javanica	Pangolins	2019-01-01	hCoV-19/pangolin/Guangdong/1/2019		Manis javanica	tan2023
EPI_ISL_471467	Asia / China / Guangdong	Betacoronavirus	Sarbecovirus	Severe acute respiratory syndrome coronavirus 2	29803	Manis javanica	Manis	javanica	Pangolins	2019-01-01	hCoV-19/pangolin/Guangdong/A22-2/2019		Manis javanica	tan2023
EPI_ISL_471469	Asia / China / Guangdong	Betacoronavirus	Sarbecovirus	Severe acute respiratory syndrome coronavirus 2	29742	Manis javanica	Manis	javanica	Pangolins	2019-01-01	hCoV-19/pangolin/Guangdong/SM44-9/2019		Manis javanica	tan2023
EPI_ISL_471470	Asia / China / Guangdong	Betacoronavirus	Sarbecovirus	Severe acute respiratory syndrome coronavirus 2	29780	Manis javanica	Manis	javanica	Pangolins	2019-01-01	hCoV-19/pangolin/Guangdong/SM79-9/2019		Manis javanica	tan2023
EPI_ISL_9773743	Asia / Hong Kong	Betacoronavirus	Sarbecovirus	Severe acute respiratory syndrome coronavirus 2	29850	Manis javanica	Manis	javanica	Pangolins	2022-01-03	hCoV-19/Hong Kong/VM22000138_HKUVOC0589P2/2022		Manis javanica	tan2023
EPI_ISL_1098866	Asia / China / Yunnan / Puer City	Betacoronavirus	Sarbecovirus	Severe acute respiratory syndrome coronavirus 2	29749	Rhinolophus bat	Rhinolophus	bat	Bats	2018-08-01	hCoV-19/bat/Yunnan/PrC31/2018		Rhinolophus bat	tan2023
EPI_ISL_1663616	Asia / China / Yunnan / Xishuangbanna	Betacoronavirus	Sarbecovirus	Severe acute respiratory syndrome coronavirus 2	29794	Rhinolophus pusillus	Rhinolophus	pusillus	Bats	2020-05-25	hCoV-19/bat/Yunnan/RsYN06/2020		Rhinolophus pusillus	tan2023
EPI_ISL_1699443	Asia / China / Yunnan / Xishuangbanna	Betacoronavirus	Sarbecovirus	Severe acute respiratory syndrome coronavirus 2	29737	Rhinolophus sinicus	Rhinolophus	sinicus	Bats	2019-10-22	hCoV-19/bat/Yunnan/RsYN03/2019		Rhinolophus sinicus	tan2023
EPI_ISL_1699444	Asia / China / Yunnan / Xishuangbanna	Betacoronavirus	Sarbecovirus	Severe acute respiratory syndrome coronavirus 2	29712	Rhinolophus stheno	Rhinolophus	stheno	Bats	2020-04-18	hCoV-19/bat/Yunnan/RsYN04/2020		Rhinolophus stheno	tan2023
EPI_ISL_1699445	Asia / China / Yunnan / Xishuangbanna	Betacoronavirus	Sarbecovirus	Severe acute respiratory syndrome coronavirus 2	29712	Rhinolophus malayanus	Rhinolophus	malayanus	Bats	2020-05-25	hCoV-19/bat/Yunnan/RmYN05/2020		Rhinolophus malayanus	tan2023
EPI_ISL_1699446	Asia / China / Yunnan / Xishuangbanna	Betacoronavirus	Sarbecovirus	Severe acute respiratory syndrome coronavirus 2	29793	Rhinolophus pusillus	Rhinolophus	pusillus	Bats	2020-05-25	hCoV-19/bat/Yunnan/RpYN06/2020		Rhinolophus pusillus	tan2023
EPI_ISL_1699447	Asia / China / Yunnan / Xishuangbanna	Betacoronavirus	Sarbecovirus	Severe acute respiratory syndrome coronavirus 2	29734	Rhinolophus malayanus	Rhinolophus	malayanus	Bats	2020-06-03	hCoV-19/bat/Yunnan/RmYN07/2020		Rhinolophus malayanus	tan2023
EPI_ISL_1699448	Asia / China / Yunnan / Xishuangbanna	Betacoronavirus	Sarbecovirus	Severe acute respiratory syndrome coronavirus 2	29712	Rhinolophus malayanus	Rhinolophus	malayanus	Bats	2020-07-14	hCoV-19/bat/Yunnan/RmYN08/2020		Rhinolophus malayanus	tan2023
EPI_ISL_1699449	Asia / China / Yunnan / Xishuangbanna	Betacoronavirus	Sarbecovirus	Severe acute respiratory syndrome coronavirus 2	29717	Rhinolophus stheno	Rhinolophus	stheno	Bats	2020-07-28	hCoV-19/bat/Yunnan/RsYN09/2020		Rhinolophus stheno	tan2023
EPI_ISL_402131	Asia / China / Yunnan / PuÃ¢â‚¬â„¢er	Betacoronavirus	Sarbecovirus	Severe acute respiratory syndrome coronavirus 2	29855	Rhinolophus affinis	Rhinolophus	affinis	Bats	2013-07-24	hCoV-19/bat/Yunnan/RaTG13/2013		Rhinolophus affinis	tan2023
EPI_ISL_412977	Asia / China / Yunnan / Xishuangbanna	Betacoronavirus	Sarbecovirus	Severe acute respiratory syndrome coronavirus 2	29671	Rhinolophus malayanus	Rhinolophus	malayanus	Bats	2019-06-25	hCoV-19/bat/Yunnan/RmYN02/2019		Rhinolophus malayanus	tan2023
EPI_ISL_4302644	Asia / Laos	Betacoronavirus	Sarbecovirus	Severe acute respiratory syndrome coronavirus 2	29838	Rhinolophus malayanus	Rhinolophus	malayanus	Bats	2020-07-05	hCoV-19/bat/Laos/BANAL-52/2020		Rhinolophus malayanus	tan2023
EPI_ISL_4302645	Asia / Laos	Betacoronavirus	Sarbecovirus	Severe acute respiratory syndrome coronavirus 2	29632	Rhinolophus pusillus	Rhinolophus	pusillus	Bats	2020-07-07	hCoV-19/bat/Laos/BANAL-103/2020		Rhinolophus pusillus	tan2023
EPI_ISL_4302646	Asia / Laos	Betacoronavirus	Sarbecovirus	Severe acute respiratory syndrome coronavirus 2	29437	Rhinolophus malayanus	Rhinolophus	malayanus	Bats	2020-07-07	hCoV-19/bat/Laos/BANAL-116/2020		Rhinolophus malayanus	tan2023
EPI_ISL_4302647	Asia / Laos	Betacoronavirus	Sarbecovirus	Severe acute respiratory syndrome coronavirus 2	29844	Rhinolophus marshalli	Rhinolophus	marshalli	Bats	2020-07-10	hCoV-19/bat/Laos/BANAL-236/2020		Rhinolophus marshalli	tan2023
EPI_ISL_4302648	Asia / Laos	Betacoronavirus	Sarbecovirus	Severe acute respiratory syndrome coronavirus 2	29645	Rhinolophus malayanus	Rhinolophus	malayanus	Bats	2020-07-10	hCoV-19/bat/Laos/BANAL-247/2020		Rhinolophus malayanus	tan2023
EPI_ISL_852604	Asia / Cambodia / Steung Treng	Betacoronavirus	Sarbecovirus	Severe acute respiratory syndrome coronavirus 2	29787	Rhinolophus shameli	Rhinolophus	shameli	Bats	2010-12-06	hCoV-19/bat/Cambodia/RShSTT182/2010		Rhinolophus shameli	tan2023
EPI_ISL_852605	Asia / Cambodia / Steung Treng	Betacoronavirus	Sarbecovirus	Severe acute respiratory syndrome coronavirus 2	29793	Rhinolophus shameli	Rhinolophus	shameli	Bats	2010-12-06	hCoV-19/bat/Cambodia/RShSTT200/2010		Rhinolophus shameli	tan2023
KJ481931.1	USA	Deltacoronavirus	Buldecovirus	Coronavirus HKU15	25406	Sus	Sus		Pigs	2014-01-04	Deltacoronavirus PDCoV/USA/Illinois121/2014 from USA, complete genome		swine	tan2023
NC_010646.1		Gammacoronavirus	Cegacovirus	Beluga whale coronavirus SW1	31686	Delphinapterus leucas	Delphinapterus	leucas	Cetaceans		Beluga Whale coronavirus SW1, complete genome	whale liver	Delphinapterus leucas (beluga whale)	tan2023
GQ477367.1	Taiwan	Alphacoronavirus	Tegacovirus	Alphacoronavirus 1	29363	Canis	Canis		Canines	2008-11-01	Canine coronavirus strain CCoV/NTU336/F/2008, complete genome		dog	tan2023
KT444582.1	China	Betacoronavirus	Sarbecovirus	SARS-like coronavirus WIV16	30290	Rhinolophus sinicus	Rhinolophus	sinicus	Bats	2013-07-21	SARS-like coronavirus WIV16, complete genome	feces	Rhinolophus sinicus	tan2023
KF530104.1	USA: Nashville, TN	Alphacoronavirus	Setracovirus	Human coronavirus NL63	27410	Homo sapiens	Homo	sapiens	Humans	1990-04-26	Human coronavirus NL63 strain NL63/human/USA/904-20/1990, complete genome		Homo sapiens; sex: M; age: 5Y	tan2023
MK907287.1	China	Betacoronavirus	Merbecovirus	Erinaceus hedgehog coronavirus HKU31	29951	Erinaceus amurensis	Erinaceus	amurensis	Hedgehogs	2014-08-01	Erinaceus hedgehog coronavirus HKU31 strain Rs13, complete genome	Alimentary sample	Erinaceus amurensis	tan2023
KY014282.1	France	Betacoronavirus	Embecovirus	Betacoronavirus 1	30659	Homo sapiens	Homo	sapiens	Humans	2007-01-01	Human coronavirus OC43 isolate 2007-09, complete genome		Homo sapiens	tan2023
DQ915164.2	USA	Betacoronavirus	Embecovirus	Betacoronavirus 1	31076	Lama	Lama		Camelids		Bovine coronavirus isolate Alpaca, complete genome		alpaca	tan2023
KT368894.1	Saudi Arabia	Alphacoronavirus	Duvinacovirus	Human coronavirus 229E	27397	Camelus	Camelus		Camelids	2014-06-01	Camel alphacoronavirus isolate camel/Jeddah/Jd63/2014, complete genome		camel	tan2023
KF514433.1	USA: Nashville, TN	Alphacoronavirus	Duvinacovirus	Human coronavirus 229E	27165	Homo sapiens	Homo	sapiens	Humans	1993-03-11	Human coronavirus 229E strain 229E/human/USA/933-40/1993, complete genome		Homo sapiens; sex: F; age: 12Y	tan2023
HQ012368.1	Netherlands: Utrecht	Alphacoronavirus	Tegacovirus	Alphacoronavirus 1	29252	Felinae			Felines	2007-07-24	Feline coronavirus UU18, complete genome		feline	tan2023
KY770850.1	China	Unknown	Unknown	Bat coronavirus	26883	Myotis siligorensis	Myotis	siligorensis	Bats	2013-01-01	Bat coronavirus isolate Anlong-43, complete genome		Myotis siligorensis	tan2023
KY417142.1	China	Betacoronavirus	Sarbecovirus	Severe acute respiratory syndrome-related coronavirus	29725	Aselliscus stoliczkanus	Aselliscus	stoliczkanus	Bats	2014-05-12	Bat SARS-like coronavirus isolate As6526, complete genome		Aselliscus stoliczkanus	tan2023
OK017840.1	China: Jiangxi	Betacoronavirus	Sarbecovirus	Sarbecovirus sp.	29537	Rhinolophus sinicus	Rhinolophus	sinicus	Bats	2021-07-01	Sarbecovirus sp. isolate JX2021K, complete genome		Rhinolophus sinicus	tan2023
MH734115.1	Kenya	Betacoronavirus	Merbecovirus	Middle East respiratory syndrome-related coronavirus	30033	Camelus dromedarius	Camelus	dromedarius	Camelids	2018-03-13	Middle East respiratory syndrome-related coronavirus isolate MERS-CoV camel/Kenya/C1272/2018, complete genome		Camelus dromedarius	tan2023
FJ376619.2	Hong Kong	Deltacoronavirus	Buldecovirus	Bulbul coronavirus HKU11	26487	Aves			Birds	2007-01-01	Bulbul coronavirus HKU11-934, complete genome		red-whiskered bulbul	tan2023
AY304488.1	Hong Kong	Betacoronavirus	Sarbecovirus	Severe acute respiratory syndrome-related coronavirus	29731						SARS coronavirus SZ16, complete genome		sars coronavirus sz16, complete genome	tan2023
AY394994.1		Betacoronavirus	Sarbecovirus	Severe acute respiratory syndrome-related coronavirus	29765						SARS coronavirus HSZ-Bc, complete genome		sars coronavirus hsz-bc, complete genome	tan2023
KU215423.1	Belgium	Alphacoronavirus	Tegacovirus	Alphacoronavirus 1	29262	Felis catus	Felis	catus	Felines	2013-01-01	Feline coronavirus isolate Cat3_day9, complete genome		Felis catus	tan2023
LC315650.2	Japan: Tokyo	Betacoronavirus	Embecovirus	Human coronavirus HKU1	29804	Homo sapiens	Homo	sapiens	Humans	2014-01-01	Human coronavirus HKU1 Tokyo/SGH-15/2014 RNA, complete genome	nasal swab using HBTE-ALI cells	Homo sapiens	tan2023
KF530064.1	USA: Nashville, TN	Betacoronavirus	Embecovirus	Betacoronavirus 1	30577	Homo sapiens	Homo	sapiens	Humans	1996-12-04	Human coronavirus OC43 strain OC43/human/USA/9612-9/1996, complete genome		Homo sapiens; sex: F; age: 18Y	tan2023
AY559094.1	Singapore	Betacoronavirus	Sarbecovirus	Severe acute respiratory syndrome-related coronavirus	29577						SARS coronavirus Sin846, complete genome		sars coronavirus sin846, complete genome	tan2023
MG428702.1	Kenya	Alphacoronavirus	Setracovirus	Human coronavirus NL63	27781	Homo sapiens	Homo	sapiens	Humans	2010-05-11	Human coronavirus NL63 isolate Kilifi_HH_3807_11-May-2010, complete genome		Homo sapiens	tan2023
MK303622.1		Betacoronavirus	Embecovirus	Betacoronavirus 1	30665	Homo	Homo		Humans		Human coronavirus OC43 isolate MDS11, complete genome		human coronavirus oc43 isolate mds11, complete genome	tan2023
LC494127.1	Japan	Betacoronavirus	Embecovirus	Betacoronavirus 1	30951	Bovinae			Bovines	2012-04-01	Bovine coronavirus IWT-9 RNA, complete genome		bovine coronavirus iwt-9 rna, complete genome	tan2023
MZ581326.1	China	Alphacoronavirus	Pedacovirus	Porcine epidemic diarrhea virus	28028	Sus scrofa	Sus	scrofa	Pigs	2017-07-20	Porcine epidemic diarrhea virus strain YN150, complete genome		Sus scrofa	tan2023
KF530070.1	USA: Nashville, TN	Betacoronavirus	Embecovirus	Betacoronavirus 1	30573	Homo sapiens	Homo	sapiens	Humans	1999-01-15	Human coronavirus OC43 strain OC43/human/USA/991-19/1999, complete genome		Homo sapiens; sex: M; age: 19Y	tan2023
KX900409.1	USA: Minnesota	Alphacoronavirus	Tegacovirus	Alphacoronavirus 1	28521	Sus	Sus		Pigs	2014-01-31	Transmissible gastroenteritis virus strain TGEV/USA/Minnesota152/2014, complete genome	feces	transmissible gastroenteritis virus strain tgev/usa/minnesota152/2014, complete genome	tan2023
FJ938061.1	USA: California	Alphacoronavirus	Tegacovirus	Alphacoronavirus 1	29130	Felis	Felis		Felines	1998-03-10	Feline coronavirus UU3, complete genome		cat	tan2023
MW532103.1	China	Alphacoronavirus	Duvinacovirus	Human coronavirus 229E	27161	Homo sapiens	Homo	sapiens	Humans	2017-05-02	Human coronavirus 229E strain 229E/China/03/2017, complete genome	nasopharyngeal swab	Homo sapiens	tan2023
KF530108.1	USA: Nashville, TN	Alphacoronavirus	Setracovirus	Human coronavirus NL63	27410	Homo sapiens	Homo	sapiens	Humans	1989-01-05	Human coronavirus NL63 strain NL63/human/USA/891-6/1989, complete genome		Homo sapiens; sex: F; age: 6Y	tan2023
KF530063.1	USA: Nashville, TN	Betacoronavirus	Embecovirus	Betacoronavirus 1	30577	Homo sapiens	Homo	sapiens	Humans	1996-12-30	Human coronavirus OC43 strain OC43/human/USA/9612-48/1996, complete genome		Homo sapiens; sex: M; age: 50Y	tan2023
KJ584357.1	USA: Kentucky	Deltacoronavirus	Buldecovirus	Coronavirus HKU15	25422	Sus	Sus		Pigs	2014-03-07	Porcine coronavirus HKU15 strain KY4813, complete genome		pig	tan2023
KX538969.1	Malaysia: Kuala Lumpur	Betacoronavirus	Embecovirus	Betacoronavirus 1	30716	Homo sapiens	Homo	sapiens	Humans	2012-05-18	Human coronavirus OC43 isolate MY-U523/12, complete genome	nasopharyngeal swab	Homo sapiens	tan2023
OK500298.1	China	Betacoronavirus	Embecovirus	Betacoronavirus 1	30658	Homo sapiens	Homo	sapiens	Humans	2019-11-05	Human coronavirus OC43 strain OC43/China/54/2019, complete genome	nasopharyngeal_swab	Homo sapiens	tan2023
AY394993.1		Betacoronavirus	Sarbecovirus	Severe acute respiratory syndrome-related coronavirus	29736						SARS coronavirus HGZ8L2, complete genome		sars coronavirus hgz8l2, complete genome	tan2023
MF948005.1	China	Deltacoronavirus	Buldecovirus	Coronavirus HKU15	25423	Sus	Sus		Pigs	2017-08-10	Porcine deltacoronavirus strain HB-BD, complete sequence		porcine	tan2023
HQ890540.1	USA: Nashville, TN	Betacoronavirus	Sarbecovirus	Severe acute respiratory syndrome-related coronavirus	29646	Mus musculus	Mus	musculus	Rodents	2008-09-18	SARS coronavirus MA15 ExoN1 isolate d3om2, complete genome		Mus musculus; old	tan2023
KF514415.1	USA: Nashville, TN	Betacoronavirus	Sarbecovirus	Severe acute respiratory syndrome-related coronavirus	29687					2010-10-01	SARS coronavirus wtic-MB strain SARS/VeroE6_lab/USA/WTic_c1.7P20/2010, complete genome		sars coronavirus wtic-mb strain sars/veroe6_lab/usa/wtic_c1.7p20/2010, complete genome	tan2023
KF530081.1	USA: Nashville, TN	Betacoronavirus	Embecovirus	Betacoronavirus 1	30571	Homo sapiens	Homo	sapiens	Humans	1999-01-07	Human coronavirus OC43 strain OC43/human/USA/991-5/1999, complete genome		Homo sapiens; sex: F; age: 11Y	tan2023
JQ977697.1	South Korea	Gammacoronavirus	Igacovirus	Avian coronavirus	27708	Gallus gallus	Gallus	gallus	Birds	2008-01-01	Infectious bronchitis virus isolate SNU8067, complete genome		Gallus gallus	tan2023
MT350598.1	Singapore	Betacoronavirus	Nobecovirus	Rousettus bat coronavirus GCCDC1	30162	Eonycteris spelaea	Eonycteris	spelaea	Bats	2016-10-01	Rousettus bat coronavirus GCCDC1, complete genome	head swab	Eonycteris spelaea	tan2023
OK017847.1	China: Yunnan	Betacoronavirus	Sarbecovirus	Sarbecovirus sp.	30119	Rhinolophus sinicus	Rhinolophus	sinicus	Bats	2016-08-01	Sarbecovirus sp. isolate YN2016A, complete genome		Rhinolophus sinicus	tan2023
EU420139.1	Hong Kong	Alphacoronavirus	Minunacovirus	Miniopterus bat coronavirus HKU8	28773	Chiroptera			Bats		Bat coronavirus HKU8 strain AFCD77, complete genome		bat coronavirus hku8 strain afcd77, complete genome	tan2023
DQ415911.1	China: Hong Kong	Betacoronavirus	Embecovirus	Human coronavirus HKU1	29902	Homo	Homo		Humans		Human coronavirus HKU1 strain N15 genotype B, complete genome	nasopharyngeal aspirates of patients diagnosed respiratory tract infection diseases	human coronavirus hku1 strain n15 genotype b, complete genome	tan2023
KM609209.1	China: JiangSu	Alphacoronavirus	Pedacovirus	Porcine epidemic diarrhea virus	28050	Sus	Sus		Pigs	2013-03-01	Porcine epidemic diarrhea virus strain PEDV-CHZ, complete genome	small intestine of a piglet with diarrhea and vomiting	pig	tan2023
MK993519.1	China	Deltacoronavirus	Buldecovirus	Coronavirus HKU15	25380	Sus	Sus		Pigs	2019-01-01	Porcine deltacoronavirus isolate CHN/Sichuan/2019, complete genome	small intestine	porcine	tan2023
HM211098.1	China: Guangdong province	Betacoronavirus	Nobecovirus	Rousettus bat coronavirus HKU9	29136	Chiroptera			Bats	2005-12-11	Bat coronavirus HKU9-5-1, complete genome		bat BF_258I	tan2023
KY364365.1	South Korea	Deltacoronavirus	Buldecovirus	Coronavirus HKU15	25422	Sus	Sus		Pigs	2014-07-01	Porcine deltacoronavirus isolate KNU16-07, complete genome	feces	pig	tan2023
NC_016992.1	China: Hong Kong	Deltacoronavirus	Buldecovirus	Sparrow coronavirus HKU17	26083	Aves			Birds	2007-01-01	Sparrow coronavirus HKU17, complete genome		sparrow	tan2023
MH006963.1	Mexico	Alphacoronavirus	Pedacovirus	Porcine epidemic diarrhea virus	27685	Sus	Sus		Pigs	2013-03-13	Porcine epidemic diarrhea virus strain PEDV/MEX/PUE/01/2016, complete genome	gut	swine; suckling piglet	tan2023
MF769424.1	China	Alphacoronavirus	Rhinacovirus	Swine acute diarrhea syndrome coronavirus	27173	Sus	Sus		Pigs	2017-01-01	Swine acute diarrhea syndrome coronavirus isolate 182, complete genome		swine	tan2023
LC494161.1	Japan	Betacoronavirus	Embecovirus	Betacoronavirus 1	30940	Bovinae			Bovines	2007-12-01	Bovine coronavirus TCG-5 RNA, complete genome		bovine coronavirus tcg-5 rna, complete genome	tan2023
KU981060.1	China	Deltacoronavirus	Buldecovirus	Coronavirus HKU15	25420	Sus	Sus		Pigs	2015-04-15	Porcine deltacoronavirus strain NH isolate passage 0, complete genome	small intestinal contents	porcine deltacoronavirus strain nh isolate passage 0, complete genome	tan2023
AY313906.1	China: Jiangmen, Guangdong	Betacoronavirus	Sarbecovirus	Severe acute respiratory syndrome-related coronavirus	29754						SARS coronavirus GD69, complete genome		sars coronavirus gd69, complete genome	tan2023
LC687396.1	Japan: Fukushima	Alphacoronavirus	Setracovirus	Human coronavirus NL63	27543	Homo sapiens	Homo	sapiens	Humans	2019-01-01	Human coronavirus NL63 Fukushima_H552_2019 RNA, complete genome	nasopharyngeal swab	Homo sapiens	tan2023
MZ577265.1	China	Unknown	Unknown	plateatu pika coronavirus P83	28312	Ochotona curzoniae	Ochotona	curzoniae	Lagomorphs		Plateatu pika coronavirus P83, complete genome		Ochotona curzoniae	tan2023
LC494180.1	Japan	Betacoronavirus	Embecovirus	Betacoronavirus 1	30939	Bovinae			Bovines	2016-12-01	Bovine coronavirus TCG-21 RNA, complete genome		bovine coronavirus tcg-21 rna, complete genome	tan2023
FJ882938.1	USA: Tennessee	Betacoronavirus	Sarbecovirus	Severe acute respiratory syndrome-related coronavirus	29687					2007-09-22	SARS coronavirus wtic-MB, complete genome		sars coronavirus wtic-mb, complete genome	tan2023
KJ473808.1	China	Alphacoronavirus	Rhinacovirus	BtRf-AlphaCoV/YN2012	26975	Rhinolophus ferrumequinum	Rhinolophus	ferrumequinum	Bats	2012-01-01	BtRf-AlphaCoV/YN2012, complete genome		Rhinolophus ferrumequinum	tan2023
LC494145.1	Japan	Betacoronavirus	Embecovirus	Betacoronavirus 1	30954	Bovinae			Bovines	2016-12-01	Bovine coronavirus IWT-21 RNA, complete genome		bovine coronavirus iwt-21 rna, complete genome	tan2023
KX538966.1	Malaysia: Kuala Lumpur	Betacoronavirus	Embecovirus	Betacoronavirus 1	30713	Homo sapiens	Homo	sapiens	Humans	2012-04-02	Human coronavirus OC43 isolate MY-U236/12, complete genome	nasopharyngeal swab	Homo sapiens	tan2023
NC_039207.1	Germany	Betacoronavirus	Merbecovirus	Hedgehog coronavirus 1	30148	Erinaceus europaeus	Erinaceus	europaeus	Hedgehogs	2012-01-01	Betacoronavirus Erinaceus/VMC/DEU/2012 isolate ErinaceusCoV/2012-174/GER/2012, complete genome	feces	Erinaceus europaeus	tan2023
KY967360.1	USA	Betacoronavirus	Embecovirus	Betacoronavirus 1	30674	Homo sapiens	Homo	sapiens	Humans	2015-01-01	Human coronavirus OC43 strain HCoV_OC43/Seattle/USA/SC2476/2015, complete genome		Homo sapiens	tan2023
KT121572.1	Saudi Arabia	Betacoronavirus	Merbecovirus	Middle East respiratory syndrome-related coronavirus	29896	Homo sapiens	Homo	sapiens	Humans	2014-05-12	Middle East respiratory syndrome coronavirus isolate KFMC-5, complete genome		Homo sapiens	tan2023
OK017848.1	China: Yunnan	Betacoronavirus	Sarbecovirus	Sarbecovirus sp.	30010	Rhinolophus sinicus	Rhinolophus	sinicus	Bats	2016-08-01	Sarbecovirus sp. isolate YN2016B, complete genome		Rhinolophus sinicus	tan2023
MN520198.1	China: Anhui	Deltacoronavirus	Buldecovirus	Coronavirus HKU15	25413	Sus	Sus		Pigs	2019-01-01	UNVERIFIED: Porcine deltacoronavirus isolate AH2019-H, complete genome		unverified: porcine deltacoronavirus isolate ah2019-h, complete genome	tan2023
LC494152.1	Japan	Betacoronavirus	Embecovirus	Betacoronavirus 1	30950	Bovinae			Bovines	2017-02-01	Bovine coronavirus IWT-26 RNA, complete genome		bovine coronavirus iwt-26 rna, complete genome	tan2023
KC175339.1	Germany	Alphacoronavirus	Tegacovirus	Alphacoronavirus 1	29270	Canis lupus	Canis	lupus	Canines	1971-01-01	Canine coronavirus strain 171, complete genome		Canis lupus familiaris	tan2023
KM609213.1	China: ZheJiang	Alphacoronavirus	Pedacovirus	Porcine epidemic diarrhea virus	28038	Sus	Sus		Pigs	2014-03-01	Porcine epidemic diarrhea virus strain PEDV-WS, complete genome	small intestine of a piglet with diarrhea and vomiting	pig	tan2023
ON899702.1	USA: Alabama	Betacoronavirus	Sarbecovirus	Severe acute respiratory syndrome-related coronavirus	29850	Homo sapiens	Homo	sapiens	Humans	2022-06-20	Severe acute respiratory syndrome coronavirus 2 isolate SARS-CoV-2/human/USA/AL-CDC-STM-THYDQRB35/2022, complete genome	nasal swab	Homo sapiens	tan2023
NC_032107.1	Kenya	Alphacoronavirus	Setracovirus	NL63-related bat coronavirus strain BtKYNL63-9b	28363	Triaenops afer	Triaenops	afer	Bats	2010-06-21	NL63-related bat coronavirus strain BtKYNL63-9a, complete genome	fecal swab	Triaenops afer	tan2023
MW411433.1	China	Betacoronavirus	Embecovirus	Betacoronavirus 1	30722	Homo sapiens	Homo	sapiens	Humans	2020-06-04	UNVERIFIED: Human coronavirus OC43 isolate Shenzhen/Nanshan/20200604/HJD, complete genome		Homo sapiens	tan2023
KT368909.1	Saudi Arabia	Alphacoronavirus	Duvinacovirus	Human coronavirus 229E	27386	Camelus	Camelus		Camelids	2015-01-01	Camel alphacoronavirus isolate camel/Jeddah/Jd1(a)/2015, complete genome		camel	tan2023
LC494189.1	Japan	Betacoronavirus	Embecovirus	Betacoronavirus 1	30937	Bovinae			Bovines	2017-12-01	Bovine coronavirus TCG-30 RNA, complete genome		bovine coronavirus tcg-30 rna, complete genome	tan2023
OK500303.1	China	Betacoronavirus	Embecovirus	Betacoronavirus 1	30700	Homo sapiens	Homo	sapiens	Humans	2020-07-28	Human coronavirus OC43 strain OC43/China/67/2021, complete genome	nasopharyngeal_swab	Homo sapiens	tan2023
MF769427.1	China	Alphacoronavirus	Rhinacovirus	Swine acute diarrhea syndrome coronavirus	27173	Sus	Sus		Pigs	2017-01-01	Swine acute diarrhea syndrome coronavirus isolate 75, complete genome		swine	tan2023
NC_035191.1	China	Alphacoronavirus	Unknown	Wencheng Sm shrew coronavirus	25995	Suncus murinus	Suncus	murinus	Shrews	2015-01-01	Wencheng Sm shrew coronavirus isolate Xingguo-101 ORF1ab polyprotein, spike glycoprotein, envelope protein, membrane protein, and nucleocapsid protein genes, complete cds		Suncus murinus	tan2023
NC_009020.1	China: Guangdong province	Betacoronavirus	Merbecovirus	Pipistrellus bat coronavirus HKU5	30482	Chiroptera			Bats		Pipistrellus bat coronavirus HKU5, complete genome		bat	tan2023
FJ882950.1	USA: Tennessee	Betacoronavirus	Sarbecovirus	Severe acute respiratory syndrome-related coronavirus	29646					2008-08-06	SARS coronavirus ExoN1 isolate P3pp60, complete genome		sars coronavirus exon1 isolate p3pp60, complete genome	tan2023
KY554973.1	USA	Betacoronavirus	Embecovirus	Betacoronavirus 1	30713	Homo sapiens	Homo	sapiens	Humans	2016-01-01	Human coronavirus OC43 strain N07-1689B_116X, complete genome		Homo sapiens	tan2023
KU886219.1	China: Xinjiang	Betacoronavirus	Embecovirus	Betacoronavirus 1	30975	Bos taurus	Bos	taurus	Bovines	2015-05-30	Bovine coronavirus strain BCV-AKS-01, complete genome		Bos taurus; breed: Holstein	tan2023
ON472211.1	USA: Arizona, Pinal	Betacoronavirus	Sarbecovirus	Severe acute respiratory syndrome-related coronavirus	29825	Homo sapiens	Homo	sapiens	Humans	2021-10-15	Severe acute respiratory syndrome coronavirus 2 isolate SARS-CoV-2/human/USA/TG1081964/2021, complete genome	clinical	Homo sapiens	tan2023
MT040335.1	China	Betacoronavirus	Sarbecovirus	Pangolin coronavirus	29806	Manis javanica	Manis	javanica	Pangolins	2017-01-01	Pangolin coronavirus isolate PCoV_GX-P5L, complete genome		Manis javanica (Malayan pangolin)	tan2023
KY419110.1	USA	Betacoronavirus	Embecovirus	Betacoronavirus 1	30515	Sus scrofa	Sus	scrofa	Pigs	2015-08-12	Porcine hemagglutinating encephalomyelitis virus strain PHEV-CoV/swine/USA/15TOSU1582/2015, complete genome	nasal swab	Sus scrofa scrofa	tan2023
DQ648857.1		Betacoronavirus	Sarbecovirus	Severe acute respiratory syndrome-related coronavirus	29741	Chiroptera			Bats		Bat coronavirus (BtCoV/279/2005), complete genome		bat coronavirus (btcov/279/2005), complete genome	tan2023
KM609211.1	China: ShanDong	Alphacoronavirus	Pedacovirus	Porcine epidemic diarrhea virus	28038	Sus	Sus		Pigs	2014-01-01	Porcine epidemic diarrhea virus strain PEDV-LS, complete genome	small intestine of a piglet with diarrhea and vomiting	pig	tan2023
FJ376620.1	Hong Kong	Deltacoronavirus	Buldecovirus	Bulbul coronavirus HKU11	26476	Aves			Birds	2007-01-01	Bulbul coronavirus HKU11-796, complete genome		Chinese bulbul	tan2023
KP143511.1	United Kingdom	Alphacoronavirus	Tegacovirus	Alphacoronavirus 1	28971	Felis catus	Felis	catus	Felines	2013-01-01	Feline coronavirus isolate 80F, complete genome		Felis catus	tan2023
OM256446.1	China	Deltacoronavirus	Buldecovirus	Coronavirus HKU15	25403	Sus	Sus		Pigs	2021-11-01	Porcine deltacoronavirus strain PDCoV-CH-SDLY52-2021, complete genome	rectum	pig	tan2023
KY419111.1	USA	Betacoronavirus	Embecovirus	Betacoronavirus 1	29866	Sus scrofa	Sus	scrofa	Pigs	2015-08-08	Porcine hemagglutinating encephalomyelitis virus strain PHEV-CoV/swine/USA/15TOSU1727/2015, complete genome	nasal swab	Sus scrofa scrofa	tan2023
MK937828.1	China	Gammacoronavirus	Igacovirus	Avian coronavirus	27475	Gallus	Gallus		Birds	2016-01-01	Infectious bronchitis virus strain I1124/16, complete genome		Gallus	tan2023
MZ293757.1	Malaysia	Unknown	Unknown	Hipposideros bat coronavirus	30268	Hipposideros cervinus	Hipposideros	cervinus	Bats	2012-12-13	Hipposideros bat coronavirus isolate PREDICT-CoV-51/PDF-0663, complete genome	rectal swab	Hipposideros cervinus	tan2023
AY518894.1	Netherlands	Alphacoronavirus	Setracovirus	Human coronavirus NL63	27555	Homo	Homo		Humans		Human group 1 coronavirus associated with pneumonia, complete genome		human group 1 coronavirus associated with pneumonia, complete genome	tan2023
HM211100.1	China: Guangdong province	Betacoronavirus	Nobecovirus	Rousettus bat coronavirus HKU9	29136	Chiroptera			Bats	2006-04-10	Bat coronavirus HKU9-10-1, complete genome		bat BF_506I	tan2023
KT368902.1	Saudi Arabia	Alphacoronavirus	Duvinacovirus	Human coronavirus 229E	27396	Camelus	Camelus		Camelids	2014-12-01	Camel alphacoronavirus isolate camel/Jeddah/D33(a)/2014, complete genome		camel	tan2023
MN026164.1	Kenya	Betacoronavirus	Embecovirus	Betacoronavirus 1	30777	Homo sapiens	Homo	sapiens	Humans	2018-01-18	Human coronavirus OC43 isolate OC43_KLF_01_2018, complete genome	nasopharyngeal swab	Homo sapiens	tan2023
MK211374.1	China	Betacoronavirus	Sarbecovirus	Coronavirus BtRl-BetaCoV/SC2018	29648	Rhinolophus	Rhinolophus		Bats	2016-08-01	Coronavirus BtRl-BetaCoV/SC2018, complete genome		Rhinolophus sp.	tan2023
AY394998.1		Betacoronavirus	Sarbecovirus	Severe acute respiratory syndrome-related coronavirus	29736						SARS coronavirus LC1, complete genome		sars coronavirus lc1, complete genome	tan2023
LC494146.1	Japan	Betacoronavirus	Embecovirus	Betacoronavirus 1	30954	Bovinae			Bovines	2016-07-01	Bovine coronavirus IWT-16 RNA, complete genome		bovine coronavirus iwt-16 rna, complete genome	tan2023
DQ415907.1	China: Hong Kong	Betacoronavirus	Embecovirus	Human coronavirus HKU1	29887	Homo	Homo		Humans		Human coronavirus HKU1 strain N10 genotype A, complete genome	nasopharyngeal aspirates of patients diagnosed respiratory tract infection diseases	human coronavirus hku1 strain n10 genotype a, complete genome	tan2023
MT438700.1	USA: Little Rock, Arkansas	Alphacoronavirus	Duvinacovirus	Human coronavirus 229E	27307	Homo sapiens	Homo	sapiens	Humans	2017-01-27	Human coronavirus 229E isolate HCoV-229E/USA/UAMS_DID_0108/2017, complete genome	nasopharyngeal swab	Homo sapiens	tan2023
LC494175.1	Japan	Betacoronavirus	Embecovirus	Betacoronavirus 1	30941	Bovinae			Bovines	2016-01-01	Bovine coronavirus TCG-18 RNA, complete genome		bovine coronavirus tcg-18 rna, complete genome	tan2023
KF514396.1	USA: Nashville, TN	Betacoronavirus	Sarbecovirus	Severe acute respiratory syndrome-related coronavirus	29687					2009-05-19	SARS coronavirus wtic-MB strain SARS/VeroE6_lab/USA/WTic_c3P10/2009, complete genome		sars coronavirus wtic-mb strain sars/veroe6_lab/usa/wtic_c3p10/2009, complete genome	tan2023
AY502927.1	Taiwan	Betacoronavirus	Sarbecovirus	Severe acute respiratory syndrome-related coronavirus	29729						SARS coronavirus TW4, complete genome		sars coronavirus tw4, complete genome	tan2023
KJ645675.1	USA: Illinois	Alphacoronavirus	Pedacovirus	Porcine epidemic diarrhea virus	27998	Sus	Sus		Pigs	2013-12-03	Porcine epidemic diarrhea virus strain USA/Illinois81/2013, complete genome	intestines	porcine	tan2023
KF514421.1	USA: Nashville, TN	Betacoronavirus	Sarbecovirus	Severe acute respiratory syndrome-related coronavirus	29687					2010-10-01	SARS coronavirus wtic-MB strain SARS/VeroE6_lab/USA/WTic_c1.2P20/2010, complete genome		sars coronavirus wtic-mb strain sars/veroe6_lab/usa/wtic_c1.2p20/2010, complete genome	tan2023
KX900397.1	USA: North Carolina	Alphacoronavirus	Tegacovirus	Alphacoronavirus 1	28521	Sus	Sus		Pigs	2007-02-08	Transmissible gastroenteritis virus strain TGEV/USA/NorthCarolina140/2007, complete genome	intestine	transmissible gastroenteritis virus strain tgev/usa/northcarolina140/2007, complete genome	tan2023
KF530083.1	USA: Nashville, TN	Betacoronavirus	Embecovirus	Betacoronavirus 1	30577	Homo sapiens	Homo	sapiens	Humans	1987-03-17	Human coronavirus OC43 strain OC43/human/USA/873-19/1987, complete genome		Homo sapiens; sex: F; age: 21Y	tan2023
KJ958219.1	China: Beijing	Betacoronavirus	Embecovirus	Betacoronavirus 1	30714	Homo sapiens	Homo	sapiens	Humans	2011-10-04	Human coronavirus OC43 strain LY342, complete genome		Homo sapiens; sex:M; age:34Y	tan2023
DQ071615.1	China	Betacoronavirus	Sarbecovirus	Severe acute respiratory syndrome-related coronavirus	29736	Chiroptera			Bats		Bat SARS coronavirus Rp3, complete genome		bat	tan2023
MZ802777.1	Thailand	Deltacoronavirus	Buldecovirus	Coronavirus HKU15	25406	Sus scrofa	Sus	scrofa	Pigs	2016-05-01	Porcine deltacoronavirus strain PDCoV/RBR-1/2016/Thailand, complete genome	piglet small intestine	Sus scrofa	tan2023
AY304495.1	Hong Kong	Betacoronavirus	Sarbecovirus	Severe acute respiratory syndrome-related coronavirus	29720						SARS coronavirus GZ50, complete genome		sars coronavirus gz50, complete genome	tan2023
KU215422.1	Belgium	Alphacoronavirus	Tegacovirus	Alphacoronavirus 1	29262	Felis catus	Felis	catus	Felines	2013-01-01	Feline coronavirus isolate Cat2_day21_withoutdeletion, complete genome		Felis catus	tan2023
LC469308.1	Japan:Tokyo, Okutama	Unknown	Unknown	Bat coronavirus	29930	Vespertilio sinensis	Vespertilio	sinensis	Bats		Bat coronavirus Vs-CoV-1 genomic RNA, nearly complete genome		Vespertilio sinensis	tan2023
KF514430.1	USA: Nashville, TN	Alphacoronavirus	Duvinacovirus	Human coronavirus 229E	27169	Homo sapiens	Homo	sapiens	Humans	1993-03-18	Human coronavirus 229E strain 229E/human/USA/933-50/1993, complete genome		Homo sapiens; sex: M; age: 4Y	tan2023
MW532106.1	China	Alphacoronavirus	Duvinacovirus	Human coronavirus 229E	27167	Homo sapiens	Homo	sapiens	Humans	2009-06-09	Human coronavirus 229E strain 229E/China/01/2009, complete genome	nasopharyngeal swab	Homo sapiens	tan2023
MT239439.1	China	Alphacoronavirus	Tegacovirus	Alphacoronavirus 1	29347	Felis catus	Felis	catus	Felines	2016-01-01	Feline coronavirus strain ZJU1617, complete genome	ascites	Felis catus	tan2023
KX900411.1	USA: South Dakota	Alphacoronavirus	Tegacovirus	Alphacoronavirus 1	28521	Sus	Sus		Pigs	2014-02-05	Transmissible gastroenteritis virus strain TGEV/USA/SouthDakota154/2014, complete genome	feces	transmissible gastroenteritis virus strain tgev/usa/southdakota154/2014, complete genome	tan2023
MT501655.1	China	Unknown	Unknown	Coronavirus cya-BetaCoV/2019	30499	Homo sapiens	Homo	sapiens	Humans	2019-06-01	Coronavirus cya-BetaCoV/2019, complete genome	pharyngeal swabs	Homo sapiens	tan2023
AY502932.1	Taiwan	Betacoronavirus	Sarbecovirus	Severe acute respiratory syndrome-related coronavirus	29729						SARS coronavirus TW9, complete genome		sars coronavirus tw9, complete genome	tan2023
MK472070.1	Australia	Alphacoronavirus	Decacovirus	Alphacoronavirus WA3607	28009	Chiroptera			Bats	2018-01-01	Alphacoronavirus sp. WA3607, complete genome		microbat	tan2023
FJ938062.1	Netherlands: Utrecht	Alphacoronavirus	Tegacovirus	Alphacoronavirus 1	29266	Felis	Felis		Felines	2007-05-24	Feline coronavirus UU9, complete genome		cat	tan2023
MF593268.1	South Africa	Betacoronavirus	Merbecovirus	Middle East respiratory syndrome-related coronavirus	30009	Laephotis capensis	Laephotis	capensis	Bats	2015-04-20	Middle East respiratory syndrome-related coronavirus strain Neoromicia/5038, complete genome	fecal, intestine	Neoromicia capensis	tan2023
KJ567050.1	USA: Iowa	Deltacoronavirus	Buldecovirus	Coronavirus HKU15	25422	Sus	Sus		Pigs	2014-02-20	Porcine deltacoronavirus 8734/USA-IA/2014, complete genome		pig	tan2023
KT368899.1	Saudi Arabia	Alphacoronavirus	Duvinacovirus	Human coronavirus 229E	27390	Camelus	Camelus		Camelids	2014-11-01	Camel alphacoronavirus isolate camel/Jeddah/N60/2014, complete genome		camel	tan2023
MN520208.1	China: Jiangsu	Deltacoronavirus	Buldecovirus	Coronavirus HKU15	25407	Sus	Sus		Pigs	2018-07-01	UNVERIFIED: Porcine deltacoronavirus isolate JS2018-YC15, complete genome		unverified: porcine deltacoronavirus isolate js2018-yc15, complete genome	tan2023
MG757597.1	Saudi Arabia	Betacoronavirus	Merbecovirus	Middle East respiratory syndrome-related coronavirus	30096	Homo sapiens	Homo	sapiens	Humans	2015-08-24	Middle East respiratory syndrome-related coronavirus isolate Hu/Riyadh-KSA-007D1N/2015, complete genome	nasopharyngeal swab	Homo sapiens	tan2023
OL674079.1	China: Yunnan, Puer	Betacoronavirus	Sarbecovirus	Severe acute respiratory syndrome-related coronavirus	29645	Rhinolophus stheno	Rhinolophus	stheno	Bats	2015-05-29	Severe acute respiratory syndrome-related coronavirus isolate Rs7924, complete genome	anal swab	Rhinolophus stheno	tan2023
DQ811789.2	USA:Indiana	Alphacoronavirus	Tegacovirus	Alphacoronavirus 1	28544	Sus	Sus		Pigs	1952-01-01	TGEV virulent Purdue, complete genome		porcine	tan2023
JN874561.1	China	Betacoronavirus	Embecovirus	Rabbit coronavirus HKU14	31096	Oryctolagus cuniculus	Oryctolagus	cuniculus	Lagomorphs	2007-01-01	Rabbit coronavirus HKU14 strain HKU14-8, complete genome		Oryctolagus cuniculus	tan2023
MN611520.1	China	Betacoronavirus	Merbecovirus	Pipistrellus abramus bat coronavirus HKU5-related	30511	Pipistrellus abramus	Pipistrellus	abramus	Bats	2018-03-01	Pipistrellus abramus bat coronavirus HKU5-related isolate BY140568, complete genome		Pipistrellus abramus	tan2023
LC642814.1	Japan	Betacoronavirus	Embecovirus	Betacoronavirus 1	31015	Bos taurus	Bos	taurus	Bovines	2020-01-01	Bovine coronavirus BoCoV GF2020 RNA, complete genome		Bos taurus	tan2023
KF923903.1	China: Beijing	Betacoronavirus	Embecovirus	Betacoronavirus 1	30713	Homo sapiens	Homo	sapiens	Humans	2012-05-01	Human coronavirus OC43 isolate 12691/2012, complete genome	nasal and throat swab	Homo sapiens	tan2023
JX860640.1	South Korea	Betacoronavirus	Embecovirus	Betacoronavirus 1	31028	Canis	Canis		Canines	2008-01-01	Canine respiratory coronavirus strain K37, complete genome	lung	dog	tan2023
KX538965.1	Malaysia: Kuala Lumpur	Betacoronavirus	Embecovirus	Betacoronavirus 1	30716	Homo sapiens	Homo	sapiens	Humans	2012-03-28	Human coronavirus OC43 isolate MY-U208/12, complete genome	nasopharyngeal swab	Homo sapiens	tan2023
JF292920.1	USA: Nashville, TN	Betacoronavirus	Sarbecovirus	Severe acute respiratory syndrome-related coronavirus	29646	Mus musculus	Mus	musculus	Rodents	2008-09-19	SARS coronavirus MA15 isolate d3om5, complete genome		Mus musculus; old	tan2023
ON791801.1	USA	Alphacoronavirus	Duvinacovirus	Human coronavirus 229E	27284	Homo sapiens	Homo	sapiens	Humans	2022-01-01	Human coronavirus 229E strain LC22, complete genome		Homo sapiens	tan2023
KF514404.1	USA: Nashville, TN	Betacoronavirus	Sarbecovirus	Severe acute respiratory syndrome-related coronavirus	29687					2010-10-01	SARS coronavirus wtic-MB strain SARS/VeroE6_lab/USA/WTic_c1.9P20/2010, complete genome		sars coronavirus wtic-mb strain sars/veroe6_lab/usa/wtic_c1.9p20/2010, complete genome	tan2023
MZ342899.1	China	Alphacoronavirus	Pedacovirus	Porcine epidemic diarrhea virus	28064	Sus scrofa	Sus	scrofa	Pigs	2017-01-01	Porcine epidemic diarrhea virus isolate PEDV HM, complete genome		Sus scrofa	tan2023
KY688119.1	Saudi Arabia	Betacoronavirus	Merbecovirus	Middle East respiratory syndrome-related coronavirus	30061	Homo sapiens	Homo	sapiens	Humans	2015-05-01	Middle East respiratory syndrome-related coronavirus strain Hu/Aseer-KSA-Rs924/2015, complete genome	respiratory secretions	Homo sapiens	tan2023
KU291449.1	Kenya	Alphacoronavirus	Duvinacovirus	Human coronavirus 229E	27164	Camelus dromedarius	Camelus	dromedarius	Camelids	2015-01-01	Camel alphacoronavirus Camel229E isolate Camel229E-CoV/KCSP1/KEN/2015, complete genome		Camelus dromedarius	tan2023
AY394991.1		Betacoronavirus	Sarbecovirus	Severe acute respiratory syndrome-related coronavirus	29736						SARS coronavirus HZS2-Fc, complete genome		sars coronavirus hzs2-fc, complete genome	tan2023
AY567487.2		Alphacoronavirus	Setracovirus	Human coronavirus NL63	27553	Homo	Homo		Humans		Human Coronavirus NL63, complete genome		human coronavirus nl63, complete genome	tan2023
KC461235.1	USA	Alphacoronavirus	Tegacovirus	Alphacoronavirus 1	29357	Felis catus	Felis	catus	Felines	2011-01-01	Feline infectious peritonitis virus isolate FCoVWSU791146_P1, complete genome		Felis catus	tan2023
LC687400.1	Japan: Fukushima	Betacoronavirus	Embecovirus	Betacoronavirus 1	30693	Homo sapiens	Homo	sapiens	Humans	2019-01-01	Human coronavirus OC43 Fukushima_O502_2019 RNA, complete genome	nasopharyngeal swab	Homo sapiens	tan2023
KR265847.1	USA: Minnesota	Deltacoronavirus	Buldecovirus	Coronavirus HKU15	25394	Sus	Sus		Pigs	2014-03-06	Porcine deltacoronavirus strain USA/Minnesota442/2014, complete genome		pig	tan2023
OL674077.1	China: Yunnan, Puer	Betacoronavirus	Sarbecovirus	Severe acute respiratory syndrome-related coronavirus	29803	Rhinolophus affinis	Rhinolophus	affinis	Bats	2015-05-29	Severe acute respiratory syndrome-related coronavirus isolate Ra7909, complete genome	anal swab	Rhinolophus affinis	tan2023
EF065506.1	China: Guangdong province	Betacoronavirus	Merbecovirus	Tylonycteris bat coronavirus HKU4	30286	Chiroptera			Bats		Bat coronavirus HKU4-2, complete genome		bat	tan2023
ON128616.1	China	Betacoronavirus	Embecovirus	Human coronavirus HKU1	29883	Homo sapiens	Homo	sapiens	Humans	2018-12-14	Human coronavirus HKU1 isolate GZFE18186, complete genome		Homo sapiens	tan2023
HM211101.1	China: Guangdong province	Betacoronavirus	Nobecovirus	Rousettus bat coronavirus HKU9	29122	Chiroptera			Bats	2006-04-10	Bat coronavirus HKU9-10-2, complete genome		bat BF_506I	tan2023
MN535732.1	Denmark: Moensted	Unknown	Unknown	Bat coronavirus	28140	Myotis daubentonii	Myotis	daubentonii	Bats	2014-10-01	MAG: Bat coronavirus isolate BtCoV/13585-58/M.dau/DK/2014, complete genome	feces	Myotis daubentonii	tan2023
KT368897.1	Saudi Arabia	Alphacoronavirus	Duvinacovirus	Human coronavirus 229E	27395	Camelus	Camelus		Camelids	2014-10-01	Camel alphacoronavirus isolate camel/Jeddah/O100/2014, complete genome		camel	tan2023
KF530123.1	Netherlands: Utrecht	Alphacoronavirus	Tegacovirus	Alphacoronavirus 1	29123	Felis catus	Felis	catus	Felines	2010-08-17	Feline coronavirus strain Felis catus/NLD/UU88/2010, complete genome		Felis catus	tan2023
MH687974.1	Viet Nam	Betacoronavirus	Unknown	Betacoronavirus sp.	31223	Rattus argentiventer	Rattus	argentiventer	Rodents	2014-11-12	Betacoronavirus sp. strain VZ_BetaCoV_20724_43, complete genome		Rattus argentiventer	tan2023
MK071623.1	Colombia	Alphacoronavirus	Pedacovirus	Porcine epidemic diarrhea virus	28029	Sus	Sus		Pigs	2014-03-16	Porcine epidemic diarrhea virus strain COL/Cundinamarca03715/2014, complete genome	intestine	porcine	tan2023
AY394985.1		Betacoronavirus	Sarbecovirus	Severe acute respiratory syndrome-related coronavirus	29530						SARS coronavirus HSZ-Bb, complete genome		sars coronavirus hsz-bb, complete genome	tan2023
MK937830.1	China	Gammacoronavirus	Igacovirus	Avian coronavirus	27485	Gallus	Gallus		Birds		Infectious bronchitis virus strain M41, complete genome		Gallus	tan2023
KJ601777.1	USA: Illinois	Deltacoronavirus	Buldecovirus	Coronavirus HKU15	25408	Sus	Sus		Pigs	2014-01-08	Deltacoronavirus PDCoV/USA/Illinois133/2014 from USA, complete genome		swine	tan2023
KF514395.1	USA: Nashville, TN	Betacoronavirus	Sarbecovirus	Severe acute respiratory syndrome-related coronavirus	29687					2009-03-18	SARS coronavirus ExoN1 strain SARS/VeroE6_lab/USA/ExoN1_c8P1/2009, complete genome		sars coronavirus exon1 strain sars/veroe6_lab/usa/exon1_c8p1/2009, complete genome	tan2023
MK862249.1	China	Alphacoronavirus	Pedacovirus	Porcine epidemic diarrhea virus	28038	Sus	Sus		Pigs	2017-08-01	Porcine epidemic diarrhea virus strain HeN170821, complete genome	diarrhea in the small intestine of piglets	pig	tan2023
MT438699.1	USA: Little Rock, Arkansas	Alphacoronavirus	Duvinacovirus	Human coronavirus 229E	27060	Homo sapiens	Homo	sapiens	Humans	2017-02-27	Human coronavirus 229E isolate HCoV-229E/USA/ACRI_0246/2017, complete genome	nasopharyngeal swab	Homo sapiens	tan2023
KY369907.1	USA	Betacoronavirus	Embecovirus	Betacoronavirus 1	30725	Homo sapiens	Homo	sapiens	Humans	2016-01-01	Human coronavirus OC43 strain HCoV_OC43/Seattle/USA/SC9741/2016, complete genome		Homo sapiens	tan2023
AY502925.1	Taiwan	Betacoronavirus	Sarbecovirus	Severe acute respiratory syndrome-related coronavirus	29729						SARS coronavirus TW2, complete genome		sars coronavirus tw2, complete genome	tan2023
MK303623.1		Betacoronavirus	Embecovirus	Betacoronavirus 1	30419	Homo	Homo		Humans		Human coronavirus OC43 isolate MDS12, complete genome		human coronavirus oc43 isolate mds12, complete genome	tan2023
LC494172.1	Japan	Betacoronavirus	Embecovirus	Betacoronavirus 1	30952	Bovinae			Bovines	2007-12-01	Bovine coronavirus TCG-6 RNA, complete genome		bovine coronavirus tcg-6 rna, complete genome	tan2023
MZ368889.1	China: Hebei	Alphacoronavirus	Tegacovirus	Alphacoronavirus 1	28590	Sus	Sus		Pigs	2020-06-24	Transmissible gastroenteritis virus strain HB-1, complete genome	piglet with diarrhea	pig	tan2023
MZ328303.1	China	Alphacoronavirus	Unknown	Wenzhou Suncus murinus alphacoronavirus 1	25940	Suncus murinus	Suncus	murinus	Shrews	2016-01-01	Wenzhou Suncus murinus alphacoronavirus 1, complete genome		Suncus murinus	tan2023
OK318939.1	China	Betacoronavirus	Embecovirus	Betacoronavirus 1	30681	Homo sapiens	Homo	sapiens	Humans	2018-11-30	Human coronavirus OC43 strain OC43/China/19/2019, complete genome	nasopharyngeal_swab	Homo sapiens	tan2023
MG596803.1	Italy	Betacoronavirus	Merbecovirus	Middle East respiratory syndrome-related coronavirus	30039	Pipistrellus kuhlii	Pipistrellus	kuhlii	Bats	2011-01-01	Middle East respiratory syndrome-related coronavirus isolate Bat-CoV/P.khulii/Italy/206645-63/2011, complete genome	carcass	Pipistrellus kuhlii	tan2023
KY417150.1	China	Betacoronavirus	Sarbecovirus	Severe acute respiratory syndrome-related coronavirus	30311	Rhinolophus sinicus	Rhinolophus	sinicus	Bats	2013-07-21	Bat SARS-like coronavirus isolate Rs4874, complete genome		Rhinolophus sinicus	tan2023
KY419106.1	USA	Betacoronavirus	Embecovirus	Betacoronavirus 1	29866	Sus scrofa	Sus	scrofa	Pigs	2015-08-15	Porcine hemagglutinating encephalomyelitis virus strain PHEV-CoV/swine/USA/15TOSU1785/2015, complete genome	nasal swab	Sus scrofa scrofa	tan2023
MN690611.1	USA	Gammacoronavirus	Cegacovirus	Bottlenose dolphin coronavirus	31728	Tursiops	Tursiops		Cetaceans		Bottlenose dolphin coronavirus strain 37112-4, complete genome	feces	bottlenose dolphin	tan2023
MK211369.1	China	Alphacoronavirus	Pedacovirus	Coronavirus BtSk-AlphaCoV/GX2018A	28303	Scotophilus kuhlii	Scotophilus	kuhlii	Bats	2017-05-01	Coronavirus BtSk-AlphaCoV/GX2018A, complete genome		Scotophilus kuhlii	tan2023
LC260045.1	Japan: Hokkaido	Deltacoronavirus	Buldecovirus	Coronavirus HKU15	25359	Sus scrofa	Sus	scrofa	Pigs	2016-09-01	Porcine deltacoronavirus genomic RNA, complete genome, strain: HKD/JPN/2016		Sus scrofa domesticus	tan2023
NC_009657.1		Alphacoronavirus	Pedacovirus	Alphacoronavirus scotophili	28203	Chiroptera			Bats		Scotophilus bat coronavirus 512, complete genome		scotophilus bat coronavirus 512, complete genome	tan2023
OM912706.1	Mexico: South	Gammacoronavirus	Igacovirus	Avian coronavirus	27697	Gallus gallus	Gallus	gallus	Birds	2021-12-14	Infectious bronchitis virus isolate IBV/ck/MEX/2956/21, complete genome	choanal cleft/lung swab; 28-day-old chicken	Gallus gallus domesticus (broiler); SEPRL-ID:2956	tan2023
OK017802.1	China: Hubei	Betacoronavirus	Sarbecovirus	Sarbecovirus sp.	29544	Rhinolophus	Rhinolophus		Bats	2020-07-01	Sarbecovirus sp. isolate HB2020E, complete genome		Rhinolophus sp.	tan2023
KT253328.1	Saudi Arabia	Alphacoronavirus	Duvinacovirus	Human coronavirus 229E	27270	Camelus dromedarius	Camelus	dromedarius	Camelids	2014-01-01	Camel alphacoronavirus Camel229E isolate Camel229E-CoV/JC50_HUH7/KSA/2014, complete genome	cell culture supernatant	Camelus dromedarius	tan2023
KX900394.1	USA	Alphacoronavirus	Tegacovirus	Alphacoronavirus 1	28582	Sus	Sus		Pigs	1988-01-01	Transmissible gastroenteritis virus strain TGEV/USA/HB/1988, complete genome	intestine	transmissible gastroenteritis virus strain tgev/usa/hb/1988, complete genome	tan2023
HG994860.1		Betacoronavirus	Sarbecovirus	Severe acute respiratory syndrome-related coronavirus	29903						Severe acute respiratory syndrome-related coronavirus isolate H_SC_11 genome assembly, complete genome: monopartite		severe acute respiratory syndrome-related coronavirus isolate h_sc_11 genome assembly, complete genome: monopartite	tan2023
MG977452.1	Cote d'Ivoire	Betacoronavirus	Embecovirus	Betacoronavirus 1	30704	Homo sapiens	Homo	sapiens	Humans	2016-12-10	Human coronavirus OC43 isolate TNP 12643, complete genome		Homo sapiens	tan2023
KF530069.1	USA: Nashville, TN	Betacoronavirus	Embecovirus	Betacoronavirus 1	30578	Homo sapiens	Homo	sapiens	Humans	1998-02-05	Human coronavirus OC43 strain OC43/human/USA/982-4/1998, complete genome		Homo sapiens; sex: F; age: 6Y	tan2023
FJ882945.1	USA: Tennessee	Betacoronavirus	Sarbecovirus	Severe acute respiratory syndrome-related coronavirus	29720					2008-11-25	SARS coronavirus MA15 isolate P3pp6, complete genome		sars coronavirus ma15 isolate p3pp6, complete genome	tan2023
MK039552.1	Jordan	Betacoronavirus	Merbecovirus	Middle East respiratory syndrome-related coronavirus	30123	Homo sapiens	Homo	sapiens	Humans	2014-04-21	Middle East respiratory syndrome-related coronavirus isolate Hu/Jordan-201440011123/2014, complete genome	respiratory secretions	Homo sapiens	tan2023
MF374985.2	USA: Albuquerque, New Mexico	Betacoronavirus	Embecovirus	Betacoronavirus 1	30705	Homo sapiens	Homo	sapiens	Humans	2017-01-17	Human coronavirus OC43 isolate HCoV-OC43/USA/TCNP_00212/2017, complete genome	nasopharyngeal swab	Homo sapiens	tan2023
KY983585.1	USA	Betacoronavirus	Embecovirus	Betacoronavirus 1	30659	Homo sapiens	Homo	sapiens	Humans	2015-01-01	Human coronavirus OC43 strain HCoV_OC43/Seattle/USA/SC2854/2015, complete genome		Homo sapiens	tan2023
NC_009021.1	China: Guangdong province	Betacoronavirus	Nobecovirus	Rousettus bat coronavirus HKU9	29114	Chiroptera			Bats		Rousettus bat coronavirus HKU9, complete genome		bat	tan2023
JX163925.1	USA	Betacoronavirus	Sarbecovirus	Severe acute respiratory syndrome-related coronavirus	29646					2010-02-05	SARS coronavirus Tor2 isolate Tor2/FP1-10895, complete genome		sars coronavirus tor2 isolate tor2/fp1-10895, complete genome	tan2023
KY674917.1	USA	Betacoronavirus	Embecovirus	Betacoronavirus 1	30536	Homo sapiens	Homo	sapiens	Humans	2016-01-01	Human coronavirus OC43 strain N07-1609B, complete genome		Homo sapiens	tan2023
DQ011855.1	Belgium	Betacoronavirus	Embecovirus	Betacoronavirus 1	30480	Sus	Sus		Pigs		Porcine hemagglutinating encephalomyelitis virus strain VW572, complete genome		porcine hemagglutinating encephalomyelitis virus strain vw572, complete genome	tan2023
LC494135.1	Japan	Betacoronavirus	Embecovirus	Betacoronavirus 1	30945	Bovinae			Bovines	2012-01-01	Bovine coronavirus IWT-7 RNA, complete genome		bovine coronavirus iwt-7 rna, complete genome	tan2023
OK017822.1	China: Guangdong	Betacoronavirus	Sarbecovirus	Sarbecovirus sp.	29512	Rhinolophus sinicus	Rhinolophus	sinicus	Bats	2017-09-01	Sarbecovirus sp. isolate GD2017P, complete genome		Rhinolophus sinicus	tan2023
OK017809.1	China: Fujian	Betacoronavirus	Sarbecovirus	Sarbecovirus sp.	29510	Rhinolophus sinicus	Rhinolophus	sinicus	Bats	2021-05-01	Sarbecovirus sp. isolate FJ2021D, complete genome		Rhinolophus sinicus	tan2023
MZ325296.1	Cameroon	Gammacoronavirus	Igacovirus	Avian coronavirus	27641	Gallus gallus	Gallus	gallus	Birds	2013-01-01	Avian coronavirus strain D2326/3/13/CM, complete genome		Gallus gallus	tan2023
AY391777.1		Betacoronavirus	Embecovirus	Betacoronavirus 1	30738	Homo	Homo		Humans		Human coronavirus OC43, complete genome		human coronavirus oc43, complete genome	tan2023
MW560715.1	South Korea	Alphacoronavirus	Pedacovirus	Porcine epidemic diarrhea virus	28038	Sus	Sus		Pigs	2019-01-01	Porcine epidemic diarrhea virus isolate KNU-1907, complete genome		pig	tan2023
MN520205.1	China: Henan	Deltacoronavirus	Buldecovirus	Coronavirus HKU15	25420	Sus	Sus		Pigs	2019-03-01	UNVERIFIED: Porcine deltacoronavirus isolate HN2019-C115, complete genome		unverified: porcine deltacoronavirus isolate hn2019-c115, complete genome	tan2023
MK062183.1	USA	Betacoronavirus	Sarbecovirus	Severe acute respiratory syndrome-related coronavirus	29874	Homo sapiens	Homo	sapiens	Humans	2017-05-31	SARS coronavirus Urbani isolate icSARS-C7, complete genome		Homo sapiens	tan2023
DQ415914.1	China: Hong Kong	Betacoronavirus	Embecovirus	Human coronavirus HKU1	29887	Homo	Homo		Humans		Human coronavirus HKU1 strain N18 genotype A, complete genome	nasopharyngeal aspirates of patients diagnosed respiratory tract infection diseases	human coronavirus hku1 strain n18 genotype a, complete genome	tan2023
JQ065045.1	China: Hong Kong	Deltacoronavirus	Buldecovirus	Sparrow coronavirus HKU17	26083	Aves			Birds	2007-01-01	Sparrow coronavirus HKU17 strain HKU17-6124, complete genome		sparrow	tan2023
KF923897.1	China: Beijing	Betacoronavirus	Embecovirus	Betacoronavirus 1	30711	Homo sapiens	Homo	sapiens	Humans	2012-06-01	Human coronavirus OC43 isolate 3269A/2012, complete genome	nasopharyngeal aspirate	Homo sapiens	tan2023
OK017796.1	China: Liaoning	Betacoronavirus	Sarbecovirus	Sarbecovirus sp.	28588	Rhinolophus ferrumequinum	Rhinolophus	ferrumequinum	Bats	2020-09-01	Sarbecovirus sp. isolate LN2020C, complete genome		Rhinolophus ferrumequinum	tan2023
MH025762.1	China	Deltacoronavirus	Buldecovirus	Coronavirus HKU15	25438	Sus	Sus		Pigs	2016-01-01	Porcine deltacoronavirus strain CH/JXJGS01/P7, complete genome		swine	tan2023
JN874560.1	China	Betacoronavirus	Embecovirus	Rabbit coronavirus HKU14	31116	Oryctolagus cuniculus	Oryctolagus	cuniculus	Lagomorphs	2007-01-01	Rabbit coronavirus HKU14 strain HKU14-3, complete genome		Oryctolagus cuniculus	tan2023
KF923912.1	China: Beijing	Betacoronavirus	Embecovirus	Betacoronavirus 1	30713	Homo sapiens	Homo	sapiens	Humans	2007-06-01	Human coronavirus OC43 isolate 5484/2007, complete genome	nasal and throat swab	Homo sapiens	tan2023
AY559096.1	Singapore	Betacoronavirus	Sarbecovirus	Severe acute respiratory syndrome-related coronavirus	29720						SARS coronavirus Sin850, complete genome		sars coronavirus sin850, complete genome	tan2023
MN173781.1	China	Deltacoronavirus	Buldecovirus	Coronavirus HKU15	25408	Sus	Sus		Pigs	2018-01-01	Porcine deltacoronavirus isolate CHN-GX81-2018, complete genome		porcine deltacoronavirus isolate chn-gx81-2018, complete genome	tan2023
KF923910.1	China: Beijing	Betacoronavirus	Embecovirus	Betacoronavirus 1	30713	Homo sapiens	Homo	sapiens	Humans	2007-06-01	Human coronavirus OC43 isolate 5445/2007, complete genome	nasal and throat swab	Homo sapiens	tan2023
KT368896.1	Saudi Arabia	Alphacoronavirus	Duvinacovirus	Human coronavirus 229E	27389	Camelus	Camelus		Camelids	2014-10-01	Camel alphacoronavirus isolate camel/Jeddah/O47(a)/2014, complete genome		camel	tan2023
KX022603.1	USA: Minnesota	Deltacoronavirus	Buldecovirus	Coronavirus HKU15	25394	Sus	Sus		Pigs	2015-12-18	Porcine deltacoronavirus strain PDCoV/USA/Minnesota140/2015, complete genome	feces	pig	tan2023
KY967358.1	USA	Betacoronavirus	Embecovirus	Betacoronavirus 1	30670	Homo sapiens	Homo	sapiens	Humans	2015-01-01	Human coronavirus OC43 strain HCoV_OC43/Seattle/USA/SC2770/2015, complete genome		Homo sapiens	tan2023
KJ473822.1	China	Betacoronavirus	Merbecovirus	Tylonycteris bat coronavirus HKU4	30247	Tylonycteris pachypus	Tylonycteris	pachypus	Bats	2012-01-01	BtTp-BetaCoV/GX2012, complete genome		Tylonycteris pachypus	tan2023
KX154690.1	Saudi Arabia	Betacoronavirus	Merbecovirus	Middle East respiratory syndrome-related coronavirus	30096	Homo sapiens	Homo	sapiens	Humans	2016-01-01	Middle East respiratory syndrome-related coronavirus isolate Hu/Jeddah-KSA-161RS1146/2016, complete genome	respiratory secretions	Homo sapiens	tan2023
MF095123.1	China	Deltacoronavirus	Buldecovirus	Coronavirus HKU15	25399	Sus scrofa	Sus	scrofa	Pigs	2017-02-15	Porcine deltacoronavirus isolate CHN-HG-2017, complete genome		Sus scrofa	tan2023
OL311151.1	China: Yunnan province	Deltacoronavirus	Unknown	Deltacoronavirus sp.	26159	Chroicocephalus ridibundus	Chroicocephalus	ridibundus	Birds	2021-03-03	Deltacoronavirus sp. isolate HNU4-2, complete genome		Chroicocephalus ridibundus	tan2023
MF374983.2	USA: Albuquerque, New Mexico	Betacoronavirus	Embecovirus	Betacoronavirus 1	30721	Homo sapiens	Homo	sapiens	Humans	2016-02-01	Human coronavirus OC43 isolate HCoV-OC43/USA/TCNP_0070/2016, complete genome	nasopharyngeal swab	Homo sapiens	tan2023
DQ415901.1	China: Hong Kong	Betacoronavirus	Embecovirus	Human coronavirus HKU1	30097	Homo	Homo		Humans		Human coronavirus HKU1 strain N24 genotype A, complete genome	nasopharyngeal aspirates of patients diagnosed respiratory tract infection diseases	human coronavirus hku1 strain n24 genotype a, complete genome	tan2023
KC869678.4	South Africa	Betacoronavirus	Merbecovirus	Middle East respiratory syndrome-related coronavirus	30111	Laephotis capensis	Laephotis	capensis	Bats	2011-01-01	Coronavirus Neoromicia/PML-PHE1/RSA/2011, complete genome		Neoromicia capensis	tan2023
MK994936.1	China	Alphacoronavirus	Rhinacovirus	Swine acute diarrhea syndrome coronavirus	27107	Sus	Sus		Pigs	2018-07-01	Swine acute diarrhea syndrome coronavirus isolate SADS-CoV/GDWT-P48, complete genome		swine	tan2023
MH043954.1	USA: Pennsylvania	Betacoronavirus	Embecovirus	Betacoronavirus 1	31016	Bos taurus	Bos	taurus	Bovines	2017-04-01	Bovine coronavirus isolate 4-17-08, complete genome	feces	Bos taurus	tan2023
AP006561.1		Betacoronavirus	Sarbecovirus	Severe acute respiratory syndrome-related coronavirus	29727						SARS coronavirus TWY genomic RNA, complete genome	primary sample from patient #02 with severe acute respiratory syndrome (SARS)	sars coronavirus twy genomic rna, complete genome	tan2023
KP886809.1	China	Betacoronavirus	Sarbecovirus	Severe acute respiratory syndrome-related coronavirus	29723	Rhinolophus Ferrumequinum	Rhinolophus	ferrumequinum	Bats	2013-05-23	Bat SARS-like coronavirus YNLF_34C, complete genome		Rhinolophus Ferrumequinum	tan2023
MG837131.1	South Korea	Deltacoronavirus	Buldecovirus	Coronavirus HKU15	25422	Sus	Sus		Pigs	2016-11-01	Porcine deltacoronavirus isolate KNU16-07-P10, complete genome		pig	tan2023
OL674080.1	China: Yunnan, Puer	Betacoronavirus	Sarbecovirus	Severe acute respiratory syndrome-related coronavirus	29802	Rhinolophus stheno	Rhinolophus	stheno	Bats	2015-05-29	Severe acute respiratory syndrome-related coronavirus isolate Rs7931, complete genome	anal swab	Rhinolophus stheno	tan2023
KT696544.1	China	Alphacoronavirus	Tegacovirus	Alphacoronavirus 1	28542	Sus	Sus		Pigs	2012-01-01	Transmissible gastroenteritis virus strain JS2012, complete genome		pig	tan2023
EF203064.1		Alphacoronavirus	Rhinacovirus	Rhinolophus bat coronavirus HKU2	27165	Chiroptera			Bats		Bat coronavirus HKU2 strain HKU2/GD/430/2006, complete genome		bat coronavirus hku2 strain hku2/gd/430/2006, complete genome	tan2023
MF769437.1	China	Alphacoronavirus	Rhinacovirus	Swine acute diarrhea syndrome coronavirus	27173	Sus	Sus		Pigs	2017-01-01	Swine acute diarrhea syndrome coronavirus isolate 54, complete genome		swine	tan2023
KT368911.1	Saudi Arabia	Alphacoronavirus	Duvinacovirus	Human coronavirus 229E	27393	Camelus	Camelus		Camelids	2015-01-01	Camel alphacoronavirus isolate camel/Jeddah/Jd8/2015, complete genome		camel	tan2023
MT984589.1	Ukraine	Gammacoronavirus	Igacovirus	Avian coronavirus	27845	Gallus gallus	Gallus	gallus	Birds	2011-01-01	Avian coronavirus strain D1617/3/2011/UA, complete genome		Gallus gallus	tan2023
MF769430.1	China	Alphacoronavirus	Rhinacovirus	Swine acute diarrhea syndrome coronavirus	27173	Sus	Sus		Pigs	2017-01-01	Swine acute diarrhea syndrome coronavirus isolate 188, complete genome		swine	tan2023
MH687935.1	Viet Nam	Alphacoronavirus	Unknown	Alphacoronavirus sp.	27757	Scotophilus kuhlii	Scotophilus	kuhlii	Bats	2014-06-17	Alphacoronavirus sp. strain VZ_AlphaCoV_16715_24, complete genome		Scotophilus kuhlii	tan2023
FJ882927.1	USA: Tennessee	Betacoronavirus	Sarbecovirus	Severe acute respiratory syndrome-related coronavirus	29687					2007-09-26	SARS coronavirus wtic-MB isolate P1pp1, complete genome		sars coronavirus wtic-mb isolate p1pp1, complete genome	tan2023
NC_002645.1		Alphacoronavirus	Duvinacovirus	Human coronavirus 229E	27317	Homo	Homo		Humans		Human coronavirus 229E, complete genome		human coronavirus 229e, complete genome	tan2023
KF268336.1	USA: Philadelphia	Betacoronavirus	Embecovirus	Murine coronavirus	31294	Mus musculus	Mus	musculus	Rodents	2012-10-25	Murine coronavirus strain MHV/BHKR_lab/USA/infA59_H126A/2012, complete genome		Mus musculus	tan2023
KF514390.1	USA: Nashville, TN	Betacoronavirus	Sarbecovirus	Severe acute respiratory syndrome-related coronavirus	29687					2010-10-01	SARS coronavirus ExoN1 strain SARS/VeroE6_lab/USA/ExoN1_c5.4P20/2010, complete genome		sars coronavirus exon1 strain sars/veroe6_lab/usa/exon1_c5.4p20/2010, complete genome	tan2023
MF094688.1	China	Unknown	Unknown	Swine acute diarrhea syndrome related coronavirus	27177	Rhinolophus	Rhinolophus		Bats		Swine acute diarrhea syndrome related coronavirus isolate 162140, complete genome		Rhinolophus sp.	tan2023
MZ293752.1	Bangladesh	Betacoronavirus	Nobecovirus	Rousettus bat coronavirus GCCDC1	29112	Rousettus leschenaultii	Rousettus	leschenaultii	Bats	2012-07-14	Rousettus bat coronavirus isolate SBB-726, complete genome	mixed feces and urine	Rousettus leschenaultii	tan2023
FJ904721.1	USA	Gammacoronavirus	Igacovirus	Avian coronavirus	27474	Aves			Birds	1972-01-01	Infectious bronchitis virus strain Mass41 1972, complete genome		chicken	tan2023
KF923922.1	China: Beijing	Betacoronavirus	Embecovirus	Betacoronavirus 1	30713	Homo sapiens	Homo	sapiens	Humans	2009-03-01	Human coronavirus OC43 isolate 8164/2009, complete genome	nasal and throat swab	Homo sapiens	tan2023
HQ890541.1	USA: Nashville, TN	Betacoronavirus	Sarbecovirus	Severe acute respiratory syndrome-related coronavirus	29646	Mus musculus	Mus	musculus	Rodents	2008-10-08	SARS coronavirus MA15 isolate d2ym1, complete genome		Mus musculus; young	tan2023
FJ882926.1	USA: Tennessee	Betacoronavirus	Sarbecovirus	Severe acute respiratory syndrome-related coronavirus	29675					2007-09-22	SARS coronavirus ExoN1, complete genome		sars coronavirus exon1, complete genome	tan2023
NC_048211.1	China	Alphacoronavirus	Unknown	Wencheng Sm shrew coronavirus	25984	Suncus murinus	Suncus	murinus	Shrews	2015-01-01	Wencheng Sm shrew coronavirus isolate Xingguo-74 ORF1ab polyprotein, spike glycoprotein, envelope protein, membrane protein, and nucleocapsid protein genes, complete cds		Suncus murinus	tan2023
MW802581.1	China	Betacoronavirus	Embecovirus	Betacoronavirus 1	31256	Rattus norvegicus	Rattus	norvegicus	Rodents	2017-01-20	Betacoronavirus 1 isolate GCCDC3, complete genome		Rattus norvegicus	tan2023
MW560716.1	South Korea	Alphacoronavirus	Pedacovirus	Porcine epidemic diarrhea virus	28038	Sus	Sus		Pigs	2019-01-01	Porcine epidemic diarrhea virus isolate KNU-1907-3, complete genome		pig	tan2023
LC494159.1	Japan	Betacoronavirus	Embecovirus	Betacoronavirus 1	30947	Bovinae			Bovines	2017-10-01	Bovine coronavirus SHG-6 RNA, complete genome		bovine coronavirus shg-6 rna, complete genome	tan2023
MF314143.1	USA: Little Rock, Arkansas	Betacoronavirus	Embecovirus	Betacoronavirus 1	30737	Homo sapiens	Homo	sapiens	Humans	2016-03-07	Human coronavirus OC43 isolate HCoV-OC43/USA/ACRI_0052/2016, complete genome	nasopharyngeal swab	Homo sapiens	tan2023
KY554970.1	USA	Alphacoronavirus	Setracovirus	Human coronavirus NL63	27540	Homo sapiens	Homo	sapiens	Humans	2016-01-01	Human coronavirus NL63 strain N07-324B_182X, complete genome		Homo sapiens	tan2023
KP118886.1	China	Gammacoronavirus	Igacovirus	Avian coronavirus	27686	Gallus gallus	Gallus	gallus	Birds	2011-01-01	Infectious bronchitis virus strain ck/CH/LSD/111235, complete genome		Gallus gallus	tan2023
JF292911.1	USA: Nashville, TN	Betacoronavirus	Sarbecovirus	Severe acute respiratory syndrome-related coronavirus	29646	Mus musculus	Mus	musculus	Rodents	2008-10-10	SARS coronavirus MA15 isolate d4ym1, complete genome		Mus musculus; young	tan2023
OK391225.1	China	Betacoronavirus	Embecovirus	Betacoronavirus 1	30675	Homo sapiens	Homo	sapiens	Humans	2019-02-24	Human coronavirus OC43 strain OC43/China/32/2019, complete genome	nasopharyngeal swab	Homo sapiens	tan2023
AY585229.1	France: Paris	Betacoronavirus	Embecovirus	Betacoronavirus 1	30744	Homo	Homo		Humans		Human coronavirus OC43 serotype OC43-Paris, complete genome	respiratory clinical isolate	human coronavirus oc43 serotype oc43-paris, complete genome	tan2023
DQ415896.1	China: Hong Kong	Betacoronavirus	Embecovirus	Human coronavirus HKU1	29860	Homo	Homo		Humans		Human coronavirus HKU1 strain N19 genotype A, complete genome	nasopharyngeal aspirates of patients diagnosed respiratory tract infection diseases	human coronavirus hku1 strain n19 genotype a, complete genome	tan2023
NC_046955.1	China	Unknown	Unknown	Shrew coronavirus	27102	Sorex araneus	Sorex	araneus	Shrews	2014-12-01	Shrew coronavirus isolate Shrew-CoV/Tibet2014 ORF1ab polyprotein, spike glycoprotein, envelope protein, membrane protein, and nucleocapsid protein genes, complete cds		Sorex araneus	tan2023
KF686341.1	USA: Denver, CO	Betacoronavirus	Embecovirus	Human coronavirus HKU1	29832	Homo sapiens	Homo	sapiens	Humans	2010-01-16	Human coronavirus HKU1 strain HKU1/human/USA/HKU1-10/2010, complete genome		Homo sapiens	tan2023
KY581700.1	United Arab Emirates	Betacoronavirus	Merbecovirus	Middle East respiratory syndrome-related coronavirus	30123	Camelus	Camelus		Camelids	2014-02-18	Middle East respiratory syndrome-related coronavirus strain Camel/UAE_3B-C_2014, complete genome	nasal swab	camel	tan2023
KX512809.1	USA: Michigan	Alphacoronavirus	Minacovirus	Ferret coronavirus	28151	Mustela putorius	Mustela	putorius	Mustelids	2015-01-01	Ferret enteric coronavirus strain FECV1, complete genome		ferret	tan2023
KJ473807.1	China	Alphacoronavirus	Decacovirus	Rhinolophus ferrumequinum alphacoronavirus HuB-2013	27608	Rhinolophus ferrumequinum	Rhinolophus	ferrumequinum	Bats	2013-01-01	BtRf-AlphaCoV/HuB2013, complete genome		Rhinolophus ferrumequinum	tan2023
NC_046964.1	Italy	Alphacoronavirus	Nyctacovirus	Pipistrellus kuhlii coronavirus 3398	28128	Pipistrellus kuhlii	Pipistrellus	kuhlii	Bats	2015-01-01	Alphacoronavirus Bat-CoV/P.kuhlii/Italy/3398-19/2015, complete genome	feces	Pipistrellus kuhlii	tan2023
MK625639.1	China	Deltacoronavirus	Buldecovirus	Coronavirus HKU15	25438	Sus	Sus		Pigs	2018-10-01	Porcine deltacoronavirus isolate CH/JXJGS01/2016, complete genome		swine	tan2023
EU371561.1		Betacoronavirus	Sarbecovirus	Severe acute respiratory syndrome-related coronavirus	29602						SARS coronavirus BJ182b, complete genome		sars coronavirus bj182b, complete genome	tan2023
MF769436.1	China	Alphacoronavirus	Rhinacovirus	Swine acute diarrhea syndrome coronavirus	27173	Sus	Sus		Pigs	2017-01-01	Swine acute diarrhea syndrome coronavirus isolate 250, complete genome		swine	tan2023
KJ473796.1	China	Alphacoronavirus	Minunacovirus	Miniopterus bat coronavirus 1	28311	Miniopterus fuliginosus	Miniopterus	fuliginosus	Bats	2012-01-01	BtMf-AlphaCoV/JX2012, complete genome		Miniopterus fuliginosus	tan2023
MH687949.1	Viet Nam	Alphacoronavirus	Unknown	Alphacoronavirus sp.	28185	Scotophilus kuhlii	Scotophilus	kuhlii	Bats	2014-06-10	Alphacoronavirus sp. strain VZ_AlphaCoV_16715_76, complete genome		Scotophilus kuhlii	tan2023
NC_048216.1	Kenya	Alphacoronavirus	Setracovirus	NL63-related bat coronavirus strain BtKYNL63-9b	28679	Triaenops afer	Triaenops	afer	Bats	2010-06-21	NL63-related bat coronavirus strain BtKYNL63-9b, complete genome	fecal swab	Triaenops afer	tan2023
AY274119.3	Canada: Toronto	Betacoronavirus	Sarbecovirus	Severe acute respiratory syndrome-related coronavirus	29751	Homo sapiens	Homo	sapiens	Humans		SARS coronavirus Tor2, complete genome		Homo sapiens; patient #2 with severe acute respiratory syndrome (SARS)	tan2023
MF598681.1	United Arab Emirates	Betacoronavirus	Merbecovirus	Middle East respiratory syndrome-related coronavirus	30123	Camelus dromedarius	Camelus	dromedarius	Camelids	2015-03-01	Middle East respiratory syndrome-related coronavirus strain camel/UAE_B92_2015, complete genome	nasopharyngeal swab	Camelus dromedarius	tan2023
MH687955.1	Viet Nam	Alphacoronavirus	Unknown	Alphacoronavirus sp.	28219	Scotophilus kuhlii	Scotophilus	kuhlii	Bats	2014-09-17	Alphacoronavirus sp. strain VZ_AlphaCoV_16845_47, complete genome		Scotophilus kuhlii	tan2023
MH687945.1	Viet Nam	Alphacoronavirus	Unknown	Alphacoronavirus sp.	28235	Scotophilus kuhlii	Scotophilus	kuhlii	Bats	2014-09-16	Alphacoronavirus sp. strain VZ_AlphaCoV_16715_56, complete genome		Scotophilus kuhlii	tan2023
MG021451.1	China	Betacoronavirus	Merbecovirus	Middle East respiratory syndrome-related coronavirus	30113	Ia io	Ia	io	Bats	2013-07-17	Middle East respiratory syndrome-related coronavirus isolate NL13845, complete genome		Ia io	tan2023
AY310120.1		Betacoronavirus	Sarbecovirus	Severe acute respiratory syndrome-related coronavirus	29740						SARS coronavirus FRA, complete genome	patient from Frankfurt, Germany	sars coronavirus fra, complete genome	tan2023
AY394979.1		Betacoronavirus	Sarbecovirus	Severe acute respiratory syndrome-related coronavirus	29645						SARS coronavirus GZ-C, complete genome		sars coronavirus gz-c, complete genome	tan2023
OM692815.1	USA: New Mexico	Betacoronavirus	Sarbecovirus	Severe acute respiratory syndrome-related coronavirus	29717	Homo sapiens	Homo	sapiens	Humans	2022-01-25	Severe acute respiratory syndrome coronavirus 2 isolate SARS-CoV-2/human/USA/NM-CDC-LC0523619/2022, complete genome	Nasal Swabs	Homo sapiens	tan2023
KF923892.1	China: Beijing	Betacoronavirus	Embecovirus	Betacoronavirus 1	30713	Homo sapiens	Homo	sapiens	Humans	2007-05-01	Human coronavirus OC43 isolate 5345/2007, complete genome	nasal and throat swab	Homo sapiens	tan2023
MF769417.1	China	Alphacoronavirus	Rhinacovirus	Swine acute diarrhea syndrome coronavirus	27173	Sus	Sus		Pigs	2017-01-01	Swine acute diarrhea syndrome coronavirus isolate 31, complete genome		swine	tan2023
MN306042.1	USA	Betacoronavirus	Embecovirus	Betacoronavirus 1	30723	Homo sapiens	Homo	sapiens	Humans	2019-01-01	Human coronavirus OC43 strain HCoV_OC43/Seattle/USA/SC0839/2019, complete genome		Homo sapiens	tan2023
LC494187.1	Japan	Betacoronavirus	Embecovirus	Betacoronavirus 1	30940	Bovinae			Bovines	2017-12-01	Bovine coronavirus TCG-28 RNA, complete genome		bovine coronavirus tcg-28 rna, complete genome	tan2023
JQ765567.1	USA: Denver, CO	Alphacoronavirus	Setracovirus	Human coronavirus NL63	27487	Homo sapiens	Homo	sapiens	Humans	2009-03-12	Human coronavirus NL63 strain NL63/DEN/2009/20, complete genome	nasal pharyngeal wash from an 8 month old female	Homo sapiens; sex: F	tan2023
KY674918.1	USA	Betacoronavirus	Embecovirus	Betacoronavirus 1	30550	Homo sapiens	Homo	sapiens	Humans	2016-01-01	Human coronavirus OC43 strain N07-1647B, complete genome		Homo sapiens	tan2023
LC592689.1	Japan: Tokyo	Betacoronavirus	Embecovirus	Betacoronavirus 1	30763	Equus caballus	Equus	caballus	Equines	2020-01-01	Equine coronavirus Tokyo2020 RNA, nearly complete genome		Equus caballus	tan2023
LN610099.1	France	Gammacoronavirus	Igacovirus	Avian coronavirus	27471	Aves			Birds		Guinea fowl coronavirus GfCoV/FR/2011 complete genome	intestinal content	guinea fowl coronavirus gfcov/fr/2011 complete genome	tan2023
ON128609.1	China	Betacoronavirus	Embecovirus	Human coronavirus HKU1	29695	Homo sapiens	Homo	sapiens	Humans	2018-05-29	Human coronavirus HKU1 isolate BCH18024, complete genome		Homo sapiens	tan2023
KT368892.1	Saudi Arabia	Alphacoronavirus	Duvinacovirus	Human coronavirus 229E	27391	Camelus	Camelus		Camelids	2014-06-01	Camel alphacoronavirus isolate camel/Jeddah/Jd29/2014, complete genome		camel	tan2023
DQ286389.1	USA	Alphacoronavirus	Tegacovirus	Alphacoronavirus 1	28632	Felinae			Felines		Feline coronavirus strain DF-2, complete genome		feline coronavirus strain df-2, complete genome	tan2023
AY545914.1	China: Shenzhen	Betacoronavirus	Sarbecovirus	Severe acute respiratory syndrome-related coronavirus	29723						SARS coronavirus isolate HC/SZ/79/03, complete genome		sars coronavirus isolate hc/sz/79/03, complete genome	tan2023
OK017850.1	China: Yunnan	Betacoronavirus	Sarbecovirus	Sarbecovirus sp.	30119	Rhinolophus sinicus	Rhinolophus	sinicus	Bats	2016-08-01	Sarbecovirus sp. isolate YN2016D, complete genome		Rhinolophus sinicus	tan2023
KY770858.1	China	Betacoronavirus	Sarbecovirus	Sarbecovirus sp.	29688	Rhinolophus sinicus	Rhinolophus	sinicus	Bats	2013-01-01	Sarbecovirus sp. isolate Anlong-103, complete genome		Rhinolophus sinicus	tan2023
KJ425507.1	China	Gammacoronavirus	Igacovirus	Avian coronavirus	27642	Gallus gallus	Gallus	gallus	Birds	2013-12-16	Infectious bronchitis virus strain ck/CH/LHLJ/131216, complete genome		Gallus gallus	tan2023
KR265857.1	USA: Illinois	Deltacoronavirus	Buldecovirus	Coronavirus HKU15	25394	Sus	Sus		Pigs	2014-02-23	Porcine deltacoronavirus strain USA/Illinois273/2014, complete genome		pig	tan2023
KF530111.1	USA: Nashville, TN	Alphacoronavirus	Setracovirus	Human coronavirus NL63	27410	Homo sapiens	Homo	sapiens	Humans	1990-01-05	Human coronavirus NL63 strain NL63/human/USA/901-24/1990, complete genome		Homo sapiens; sex: M; age: 9Y	tan2023
FJ882963.1	USA	Betacoronavirus	Sarbecovirus	Severe acute respiratory syndrome-related coronavirus	29682	Homo sapiens	Homo	sapiens	Humans	2004-08-10	SARS coronavirus P2, complete genome		Homo sapiens	tan2023
FJ882956.1	USA: Tennessee	Betacoronavirus	Sarbecovirus	Severe acute respiratory syndrome-related coronavirus	29644					2008-08-06	SARS coronavirus ExoN1 isolate P3pp53, complete genome		sars coronavirus exon1 isolate p3pp53, complete genome	tan2023
NC_012936.1		Betacoronavirus	Embecovirus	Murine coronavirus	31250	Rattus	Rattus		Rodents		Rat coronavirus Parker, complete genome		rat	tan2023
KR131621.1	China	Deltacoronavirus	Buldecovirus	Coronavirus HKU15	25438	Sus	Sus		Pigs	2015-03-01	Porcine deltacoronavirus isolate PDCoV/CHJXNI2/2015, complete genome		pig	tan2023
EF424616.1	USA:Ohio	Betacoronavirus	Embecovirus	Betacoronavirus 1	30970	Bovinae			Bovines		Bovine coronavirus E-AH65-TC, complete genome		bovine	tan2023
MT308984.1		Betacoronavirus	Sarbecovirus	Severe acute respiratory syndrome-related coronavirus	29730	Mus	Mus		Rodents		Mutant SARS coronavirus Urbani clone SARS-Urbani-MA_SHC014-spike, complete genome		mouse	tan2023
MK994937.1	China	Alphacoronavirus	Rhinacovirus	Swine acute diarrhea syndrome coronavirus	27109	Sus	Sus		Pigs	2018-10-01	Swine acute diarrhea syndrome coronavirus isolate SADS-CoV/GDWT-P83, complete genome		swine	tan2023
LC061274.1	Japan: Hokkaido, Obihiro	Betacoronavirus	Embecovirus	Betacoronavirus 1	30916	Equus caballus	Equus	caballus	Equines	2012-01-01	Equine coronavirus RNA, complete genome, strain: Obihiro12-2		Equus caballus adult	tan2023
MK472071.1	Australia	Alphacoronavirus	Unknown	Alphacoronavirus sp.	27535	Chiroptera			Bats	2018-01-01	Alphacoronavirus sp. isolate WAAlc1, complete genome		microbat	tan2023
KF530088.1	USA: Nashville, TN	Betacoronavirus	Embecovirus	Betacoronavirus 1	30578	Homo sapiens	Homo	sapiens	Humans	1990-01-23	Human coronavirus OC43 strain OC43/human/USA/901-54/1990, complete genome		Homo sapiens; sex: M; age: 7Y	tan2023
MH687978.1	Viet Nam	Betacoronavirus	Unknown	Betacoronavirus sp.	31289	Rattus argentiventer	Rattus	argentiventer	Rodents	2015-02-04	Betacoronavirus sp. strain VZ_BetaCoV_22084_6, complete genome		Rattus argentiventer	tan2023
KF923925.1	China: Beijing	Betacoronavirus	Embecovirus	Betacoronavirus 1	30713	Homo sapiens	Homo	sapiens	Humans	2010-09-01	Human coronavirus OC43 isolate 10574/2010, complete genome	nasal and throat swab	Homo sapiens	tan2023
KM347965.1	Netherlands	Alphacoronavirus	Minacovirus	Ferret coronavirus	28434	Mustela putorius	Mustela	putorius	Mustelids	2010-01-01	Ferret coronavirus isolate FRCoV-NL-2010, complete genome		Mustela putorius (ferret)	tan2023
KF530094.1	USA: Nashville, TN	Betacoronavirus	Embecovirus	Betacoronavirus 1	30581	Homo sapiens	Homo	sapiens	Humans	1991-02-22	Human coronavirus OC43 strain OC43/human/USA/912-36/1991, complete genome		Homo sapiens; sex: M; age: 11Y	tan2023
KR265864.1	USA: Minnesota	Deltacoronavirus	Buldecovirus	Coronavirus HKU15	25395	Sus	Sus		Pigs	2014-03-14	Porcine deltacoronavirus strain USA/Minnesota292/2014, complete genome		pig	tan2023
EF065507.1	China: Guangdong province	Betacoronavirus	Merbecovirus	Tylonycteris bat coronavirus HKU4	30286	Chiroptera			Bats		Bat coronavirus HKU4-3, complete genome		bat	tan2023
MT438696.1	USA: Albuquerque, New Mexico	Alphacoronavirus	Duvinacovirus	Human coronavirus 229E	27297	Homo sapiens	Homo	sapiens	Humans	2016-02-09	Human coronavirus 229E isolate HCoV-229E/USA/UNM_0186/2016, complete genome	nasal swab	Homo sapiens	tan2023
FJ882943.1	USA: North Carolina	Betacoronavirus	Sarbecovirus	Severe acute respiratory syndrome-related coronavirus	29720					2008-11-21	SARS coronavirus MA15 ExoN1, complete genome		sars coronavirus ma15 exon1, complete genome	tan2023
MG812375.1	USA: IL	Deltacoronavirus	Buldecovirus	Sparrow deltacoronavirus	25795	Aves			Birds	2017-01-01	Sparrow deltacoronavirus strain ISU690-4, complete genome	fecal sample	sparrow	tan2023
KF530067.1	USA: Nashville, TN	Betacoronavirus	Embecovirus	Betacoronavirus 1	30608	Homo sapiens	Homo	sapiens	Humans	1991-02-07	Human coronavirus OC43 strain OC43/human/USA/912-10/1991, complete genome		Homo sapiens; sex: M; age: 43Y	tan2023
MN065811.1	Finland: Helsinki	Alphacoronavirus	Unknown	Bat alphacoronavirus	28119	Myotis brandtii	Myotis	brandtii	Bats	2016-08-15	Bat alphacoronavirus strain BtCoV/008_16/M.bra/FIN/2016, complete genome	feces	Myotis brandtii	tan2023
KU215421.1	Belgium	Alphacoronavirus	Tegacovirus	Alphacoronavirus 1	29161	Felis catus	Felis	catus	Felines	2013-01-01	Feline coronavirus isolate Cat2_day21_deletion, complete genome		Felis catus	tan2023
MZ325300.1	Cote d'Ivoire	Gammacoronavirus	Igacovirus	Avian coronavirus	27646	Gallus gallus	Gallus	gallus	Birds	2013-01-01	Avian coronavirus strain D2334/12/2/13/CI, complete genome		Gallus gallus	tan2023
MN482242.1	Denmark: Funen, Sollerup forest	Unknown	Unknown	Bat coronavirus	27943	Pipistrellus pygmaeus	Pipistrellus	pygmaeus	Bats	2013-08-01	MAG: Bat coronavirus isolate BtCoV/B40-5/P.pyg/DK/2013, complete genome	feces	Pipistrellus pygmaeus	tan2023
LC260040.1	Japan: Gunma	Deltacoronavirus	Buldecovirus	Coronavirus HKU15	25362	Sus scrofa	Sus	scrofa	Pigs	2014-05-01	Porcine deltacoronavirus genomic RNA, complete genome, strain: GNM-2/JPN/2014		Sus scrofa domesticus	tan2023
KX900400.1	USA: Iowa	Alphacoronavirus	Tegacovirus	Alphacoronavirus 1	28521	Sus	Sus		Pigs	2008-03-06	Transmissible gastroenteritis virus strain TGEV/USA/Iowa143/2008, complete genome	intestine	transmissible gastroenteritis virus strain tgev/usa/iowa143/2008, complete genome	tan2023
MT239440.1	China	Alphacoronavirus	Tegacovirus	Alphacoronavirus 1	29303	Felis catus	Felis	catus	Felines	2017-09-01	Feline coronavirus strain ZJU1709, complete genome	ascites	Felis catus	tan2023
MZ328302.1	China	Alphacoronavirus	Unknown	Jingmen Apodemus agrarius alphacoronavirus 1	27382	Apodemus agrarius	Apodemus	agrarius	Rodents	2016-01-01	Jingmen Apodemus agrarius alphacoronavirus 1, complete genome		Apodemus agrarius	tan2023
KY799582.1	China	Gammacoronavirus	Igacovirus	Avian coronavirus	27672	Gallus gallus	Gallus	gallus	Birds		Infectious bronchitis virus strain ck/CH/LSC/99I, complete genome		Gallus gallus	tan2023
ON325306.1	Russia	Betacoronavirus	Merbecovirus	Middle East respiratory syndrome-related coronavirus	30257	Pipistrellus nathusii	Pipistrellus	nathusii	Bats	2015-08-15	Middle East respiratory syndrome-related coronavirus isolate Bat-CoV/P.nathusii/Russia/MOW15-22/2015, complete genome	feces	Pipistrellus nathusii	tan2023
GQ153548.1		Betacoronavirus	Sarbecovirus	Severe acute respiratory syndrome-related coronavirus	29677	Chiroptera			Bats		Bat SARS coronavirus HKU3-13, complete genome		bat sars coronavirus hku3-13, complete genome	tan2023
MK062179.1	USA	Betacoronavirus	Sarbecovirus	Severe acute respiratory syndrome-related coronavirus	29727	Homo sapiens	Homo	sapiens	Humans	2017-05-27	SARS coronavirus Urbani isolate icSARS, complete genome		Homo sapiens	tan2023
MN520201.1	China: Guangdong	Deltacoronavirus	Buldecovirus	Coronavirus HKU15	25422	Sus	Sus		Pigs	2018-01-01	UNVERIFIED: Porcine deltacoronavirus isolate GD2018-186, complete genome		unverified: porcine deltacoronavirus isolate gd2018-186, complete genome	tan2023
OK391222.1	China	Betacoronavirus	Embecovirus	Betacoronavirus 1	29289	Homo sapiens	Homo	sapiens	Humans	2019-01-10	UNVERIFIED: Human coronavirus OC43 strain OC43/China/26/2019, complete genome	nasopharyngeal swab	Homo sapiens	tan2023
KR265852.1	USA: Illinois	Deltacoronavirus	Buldecovirus	Coronavirus HKU15	25394	Sus	Sus		Pigs	2014-04-21	Porcine deltacoronavirus strain USA/Illinois449/2014, complete genome		pig	tan2023
OK017808.1	China: Fujian	Betacoronavirus	Sarbecovirus	Sarbecovirus sp.	29389	Rhinolophus sinicus	Rhinolophus	sinicus	Bats	2021-05-01	Sarbecovirus sp. isolate FJ2021A, complete genome		Rhinolophus sinicus	tan2023
OK017799.1	China: Liaoning	Betacoronavirus	Sarbecovirus	Sarbecovirus sp.	29168	Rhinolophus ferrumequinum	Rhinolophus	ferrumequinum	Bats	2020-09-01	Sarbecovirus sp. isolate LN2020G, complete genome		Rhinolophus ferrumequinum	tan2023
MG757138.1	France	Betacoronavirus	Embecovirus	Betacoronavirus 1	31026	Bovinae			Bovines	2014-01-01	Bovine coronavirus isolate ICSA21-LBA, complete genome	bronchoalveolar lavage	cattle	tan2023
KX900396.1	USA: Illinois	Alphacoronavirus	Tegacovirus	Alphacoronavirus 1	28393	Sus	Sus		Pigs	2006-11-17	Transmissible gastroenteritis virus strain TGEV/USA/Illinois139/2006, complete genome	intestine	transmissible gastroenteritis virus strain tgev/usa/illinois139/2006, complete genome	tan2023
MN692778.1	Spain	Alphacoronavirus	Pedacovirus	Porcine epidemic diarrhea virus	27989	Sus	Sus		Pigs	2014-10-07	Porcine epidemic diarrhea virus isolate PEDV-1524-Segovia-Narros_de_Cuellar, complete genome		swine	tan2023
MK679660.1	United Kingdom	Betacoronavirus	Merbecovirus	Hedgehog coronavirus 1	30172	Erinaceus europaeus	Erinaceus	europaeus	Hedgehogs	2014-01-01	Hedgehog coronavirus 1, complete genome		Erinaceus europaeus	tan2023
AY585228.1	USA	Betacoronavirus	Embecovirus	Betacoronavirus 1	30741	Homo	Homo		Humans		Human coronavirus OC43 strain ATCC VR-759, complete genome		human coronavirus oc43 strain atcc vr-759, complete genome	tan2023
OK318940.1	China	Betacoronavirus	Embecovirus	Betacoronavirus 1	30667	Homo sapiens	Homo	sapiens	Humans	2018-12-09	Human coronavirus OC43 strain OC43/China/21/2019, complete genome	nasopharyngeal_swab	Homo sapiens	tan2023
JF292918.1	USA: Nashville, TN	Betacoronavirus	Sarbecovirus	Severe acute respiratory syndrome-related coronavirus	29646	Mus musculus	Mus	musculus	Rodents	2008-09-19	SARS coronavirus MA15 isolate d3om3, complete genome		Mus musculus; old	tan2023
MG197722.1	China	Betacoronavirus	Embecovirus	Betacoronavirus 1	30515	Homo	Homo		Humans	2015-12-02	Human coronavirus OC43 strain YC-207, complete genome	throat swabs or nasopharyngeal aspirates	human coronavirus oc43 strain yc-207, complete genome	tan2023
MG812377.1	USA: IL	Deltacoronavirus	Buldecovirus	Sparrow deltacoronavirus	25710	Aves			Birds	2017-01-01	Sparrow deltacoronavirus strain ISU42824, complete genome	fecal sample	sparrow	tan2023
MK211375.1	China	Betacoronavirus	Sarbecovirus	Coronavirus BtRs-BetaCoV/YN2018A	29698	Rhinolophus affinis	Rhinolophus	affinis	Bats	2016-09-01	Coronavirus BtRs-BetaCoV/YN2018A, complete genome		Rhinolophus affinis	tan2023
KF367457.1	China	Betacoronavirus	Sarbecovirus	Severe acute respiratory syndrome-related coronavirus	30309	Rhinolophus sinicus	Rhinolophus	sinicus	Bats	2012-09-01	Bat SARS-like coronavirus WIV1, complete genome		Rhinolophus sinicus	tan2023
GU593319.1	USA	Betacoronavirus	Embecovirus	Murine coronavirus	31147	Mus	Mus		Rodents		Murine hepatitis virus strain S, complete genome		mouse	tan2023
KY369911.1	USA	Alphacoronavirus	Duvinacovirus	Human coronavirus 229E	27226	Homo sapiens	Homo	sapiens	Humans	2016-01-01	Human coronavirus 229E strain HCoV_229E/Seattle/USA/SC1212/2016, complete genome		Homo sapiens	tan2023
DQ898174.1	Canada	Betacoronavirus	Sarbecovirus	Severe acute respiratory syndrome-related coronavirus	29751						SARS coronavirus strain CV7, complete genome		sars coronavirus strain cv7, complete genome	tan2023
MZ081399.1	China	Alphacoronavirus	Unknown	Alphacoronavirus sp.	27128	Rhinolophus stheno	Rhinolophus	stheno	Bats	2020-07-29	Alphacoronavirus sp. strain bat/Yunnan/RsYN25/2020, complete genome	bat feces	Rhinolophus stheno	tan2023
OK017807.1	China: Anhui	Betacoronavirus	Sarbecovirus	Sarbecovirus sp.	29465	Rhinolophus sinicus	Rhinolophus	sinicus	Bats	2021-07-01	Sarbecovirus sp. isolate AH2021A, complete genome		Rhinolophus sinicus	tan2023
MZ664635.1	USA	Betacoronavirus	Sarbecovirus	Severe acute respiratory syndrome-related coronavirus	29787	Homo sapiens	Homo	sapiens	Humans	2021-04-19	Severe acute respiratory syndrome coronavirus 2 isolate SARS-CoV-2/human/USA/UT-UPHL-210721158203/2021, complete genome		Homo sapiens	tan2023
MZ802772.1	Thailand	Deltacoronavirus	Buldecovirus	Coronavirus HKU15	25406	Sus scrofa	Sus	scrofa	Pigs	2016-09-01	Porcine deltacoronavirus strain PDCoV/CBR-1/2016/Thailand, complete genome	piglet small intestine	Sus scrofa	tan2023
MG742313.1	China: Guangzhou	Alphacoronavirus	Rhinacovirus	Rhinolophus bat coronavirus HKU2	27155	Sus	Sus		Pigs	2017-03-14	Porcine enteric alphacoronavirus strain PEAV-GD-CH/2017, complete genome		porcine enteric alphacoronavirus strain peav-gd-ch/2017, complete genome	tan2023
MH687948.1	Viet Nam	Alphacoronavirus	Unknown	Alphacoronavirus sp.	28255	Scotophilus kuhlii	Scotophilus	kuhlii	Bats	2014-06-11	Alphacoronavirus sp. strain VZ_AlphaCoV_16715_7, complete genome		Scotophilus kuhlii	tan2023
AY394983.1		Betacoronavirus	Sarbecovirus	Severe acute respiratory syndrome-related coronavirus	29699						SARS coronavirus HSZ2-A, complete genome		sars coronavirus hsz2-a, complete genome	tan2023
KF923899.1	China: Beijing	Betacoronavirus	Embecovirus	Betacoronavirus 1	30722	Homo sapiens	Homo	sapiens	Humans	2006-09-01	Human coronavirus OC43 isolate 3582/2006, complete genome	nasal and throat swab	Homo sapiens	tan2023
OK017844.1	China: Jiangxi	Betacoronavirus	Sarbecovirus	Sarbecovirus sp.	29447	Rhinolophus sinicus	Rhinolophus	sinicus	Bats	2021-07-01	Sarbecovirus sp. isolate JX2021O, complete genome		Rhinolophus sinicus	tan2023
MW532104.1	China	Alphacoronavirus	Duvinacovirus	Human coronavirus 229E	27234	Homo sapiens	Homo	sapiens	Humans	2017-08-02	Human coronavirus 229E strain 229E/China/04/2017, complete genome	nasopharyngeal swab	Homo sapiens	tan2023
LC494160.1	Japan	Betacoronavirus	Embecovirus	Betacoronavirus 1	30954	Bovinae			Bovines	2007-11-01	Bovine coronavirus TCG-4 RNA, complete genome		bovine coronavirus tcg-4 rna, complete genome	tan2023
MF083115.1	China	Betacoronavirus	Embecovirus	Betacoronavirus 1	30682	Sus scrofa	Sus	scrofa	Pigs	2014-03-01	Porcine hemagglutinating encephalomyelitis virus strain CC14, complete genome	piglet brain	Sus scrofa	tan2023
KY983588.1	USA	Betacoronavirus	Embecovirus	Betacoronavirus 1	30562	Homo sapiens	Homo	sapiens	Humans	2015-01-01	Human coronavirus OC43 strain HCoV_OC43/Seattle/USA/SC3118/2015, complete genome		Homo sapiens	tan2023
LC061272.1	Japan: Hokkaido, Obihiro	Betacoronavirus	Embecovirus	Betacoronavirus 1	30782	Equus caballus	Equus	caballus	Equines	2009-01-01	Equine coronavirus RNA, complete genome, strain: Tokachi09		Equus caballus adult	tan2023
MK334044.1	China	Alphacoronavirus	Setracovirus	Human coronavirus NL63	27516	Homo sapiens	Homo	sapiens	Humans	2018-07-13	Human coronavirus NL63 strain ChinaGD03, complete genome	nasopharyngeal swab	Homo sapiens	tan2023
HG994855.1		Betacoronavirus	Sarbecovirus	Severe acute respiratory syndrome-related coronavirus	29903						Severe acute respiratory syndrome-related coronavirus isolate H_SC_06 genome assembly, complete genome: monopartite		severe acute respiratory syndrome-related coronavirus isolate h_sc_06 genome assembly, complete genome: monopartite	tan2023
OK318946.1	China	Betacoronavirus	Embecovirus	Betacoronavirus 1	30584	Homo sapiens	Homo	sapiens	Humans	2019-08-02	Human coronavirus OC43 strain OC43/China/45/2019, complete genome	nasopharyngeal_swab	Homo sapiens	tan2023
KU380331.1	China	Alphacoronavirus	Pedacovirus	Porcine epidemic diarrhea virus	28035	Sus	Sus		Pigs	2015-05-01	Porcine epidemic diarrhea virus isolate CH-SD01, complete genome		swine	tan2023
MW685624.1	Haiti	Deltacoronavirus	Buldecovirus	Coronavirus HKU15	25444	Homo sapiens	Homo	sapiens	Humans	2015-04-13	Porcine deltacoronavirus isolate PDCoV/Haiti/Human/0329-4/2015, complete genome	plasma	Homo sapiens	tan2023
OK017851.1	China: Yunnan	Betacoronavirus	Sarbecovirus	Sarbecovirus sp.	30119	Rhinolophus sinicus	Rhinolophus	sinicus	Bats	2016-08-01	Sarbecovirus sp. isolate YN2016E, complete genome		Rhinolophus sinicus	tan2023
KP209312.1	United Arab Emirates	Betacoronavirus	Merbecovirus	Middle East respiratory syndrome-related coronavirus	30123	Homo sapiens	Homo	sapiens	Humans	2013-11-15	Middle East respiratory syndrome coronavirus strain Abu Dhabi_UAE_9_2013, complete genome	tracheal aspirate	Homo sapiens	tan2023
KF530078.1	USA: Nashville, TN	Betacoronavirus	Embecovirus	Betacoronavirus 1	30568	Homo sapiens	Homo	sapiens	Humans	1996-12-17	Human coronavirus OC43 strain OC43/human/USA/9612-29/1996, complete genome		Homo sapiens; sex: F; age: 48Y	tan2023
MW436465.1	China: Jiangxi	Gammacoronavirus	Unknown	Anser fabalis coronavirus NCN2	28466	Anatidae			Birds	2019-03-01	Anser fabalis coronavirus NCN2, complete genome	feces	Anatidae sp.	tan2023
MT820625.1	China	Alphacoronavirus	Luchacovirus	Lucheng Rn rat coronavirus	27563	Apodemus chevrieri	Apodemus	chevrieri	Rodents	2015-01-01	Lucheng Rn rat coronavirus isolate Lijiang-170, complete genome		Apodemus chevrieri	tan2023
MT820626.1	China	Alphacoronavirus	Luchacovirus	Lucheng Rn rat coronavirus	28599	Rattus norvegicus	Rattus	norvegicus	Rodents	2014-01-01	Lucheng Rn rat coronavirus isolate Ruian-83, complete genome		Rattus norvegicus	tan2023
AF304460.1		Alphacoronavirus	Duvinacovirus	Human coronavirus 229E	27317	Homo	Homo		Humans		Human coronavirus 229E, complete genome		human coronavirus 229e, complete genome	tan2023
AY502931.1	Taiwan	Betacoronavirus	Sarbecovirus	Severe acute respiratory syndrome-related coronavirus	29729						SARS coronavirus TW8, complete genome		sars coronavirus tw8, complete genome	tan2023
FJ647218.1	USA: Pennsylvania	Betacoronavirus	Embecovirus	Murine coronavirus	31285	Mus musculus	Mus	musculus	Rodents	2006-01-01	Murine coronavirus RA59/R13, complete genome		Mus musculus	tan2023
MW165134.1	USA	Betacoronavirus	Embecovirus	Betacoronavirus 1	30673	Sus scrofa	Sus	scrofa	Pigs	1970-01-01	Porcine hemagglutinating encephalomyelitis virus strain PHEV/67N/US/1970, complete genome		Sus scrofa	tan2023
OK078018.1	China	Alphacoronavirus	Rhinacovirus	Swine acute diarrhea syndrome coronavirus	27188	Sus	Sus		Pigs	2018-01-01	Swine acute diarrhea syndrome coronavirus isolate SADS-CoV-CH-JX1/2018, complete genome		swine	tan2023
FJ882939.1	USA: Tennessee	Betacoronavirus	Sarbecovirus	Severe acute respiratory syndrome-related coronavirus	29646					2008-03-28	SARS coronavirus wtic-MB isolate P3pp16, complete genome		sars coronavirus wtic-mb isolate p3pp16, complete genome	tan2023
KJ960178.1	Viet Nam	Alphacoronavirus	Pedacovirus	Porcine epidemic diarrhea virus	28035	Sus	Sus		Pigs	2013-01-01	Porcine epidemic diarrhea virus clone VN/JFP1013_1/2013/Vinh An/Vietnam, complete genome	intestine	pig	tan2023
KF514414.1	USA: Nashville, TN	Betacoronavirus	Sarbecovirus	Severe acute respiratory syndrome-related coronavirus	29687					2009-07-08	SARS coronavirus ExoN1 strain SARS/VeroE6_lab/USA/ExoN1_c5P20/2009, complete genome		sars coronavirus exon1 strain sars/veroe6_lab/usa/exon1_c5p20/2009, complete genome	tan2023
MN514967.1	Nigeria	Betacoronavirus	Embecovirus	Betacoronavirus 1	30799	Camelus dromedarius	Camelus	dromedarius	Camelids	2016-01-24	Dromedary camel coronavirus HKU23 isolate DcCoV-HKU23/camel/Nigeria/NV1385/2016, complete genome		Camelus dromedarius	tan2023
AY515512.1	China	Betacoronavirus	Sarbecovirus	Severe acute respiratory syndrome-related coronavirus	29731	Paguma larvata	Paguma	larvata	Civets		SARS coronavirus HC/SZ/61/03, complete genome		Paguma larvata (Himalayan palm civets)	tan2023
MW351629.1	China	Gammacoronavirus	Igacovirus	Avian coronavirus	27692	Aves			Birds	2019-01-01	Avian coronavirus isolate IBV-rSD-H223A/H238A/K278A/Y334A, complete genome		chicken	tan2023
MK625638.1	China	Deltacoronavirus	Buldecovirus	Coronavirus HKU15	25447	Sus	Sus		Pigs	2018-10-01	Porcine deltacoronavirus isolate CH/JXJGS01/2016, complete genome		swine	tan2023
AB257344.1		Betacoronavirus	Sarbecovirus	Severe acute respiratory syndrome-related coronavirus	29632						SARS coronavirus Frankfurt 1 genomic RNA, nearly complete genome, clone: persistent virus #21	SARS coronavirus persistenly infected Vero E6 cells	sars coronavirus frankfurt 1 genomic rna, nearly complete genome, clone: persistent virus #21	tan2023
MT984600.1	Poland	Gammacoronavirus	Igacovirus	Avian coronavirus	27348	Gallus gallus	Gallus	gallus	Birds	2013-01-01	Avian coronavirus strain D2353/2013/PL, complete genome		Gallus gallus	tan2023
KF530098.1	USA: Nashville, TN	Betacoronavirus	Embecovirus	Betacoronavirus 1	30578	Homo sapiens	Homo	sapiens	Humans	1996-05-10	Human coronavirus OC43 strain OC43/human/USA/965-6/1996, complete genome		Homo sapiens; sex: F; age: 7Y	tan2023
OL311150.1	China: Yunnan province	Deltacoronavirus	Unknown	Deltacoronavirus sp.	26159	Chroicocephalus ridibundus	Chroicocephalus	ridibundus	Birds	2021-03-03	Deltacoronavirus sp. isolate HNU4-1, complete genome		Chroicocephalus ridibundus	tan2023
KF530110.1	USA: Nashville, TN	Alphacoronavirus	Setracovirus	Human coronavirus NL63	27413	Homo sapiens	Homo	sapiens	Humans	1983-08-16	Human coronavirus NL63 strain NL63/human/USA/838-9/1983, complete genome		Homo sapiens; sex: F; age: 6Y	tan2023
AY357076.1		Betacoronavirus	Sarbecovirus	Severe acute respiratory syndrome-related coronavirus	29745						SARS coronavirus PUMC03, complete genome		sars coronavirus pumc03, complete genome	tan2023
NC_048214.1	China	Gammacoronavirus	Igacovirus	Avian coronavirus	27754	Anatidae			Birds	2014-01-01	Duck coronavirus isolate DK/GD/27/2014, complete genome		duck	tan2023
KR265853.1	USA: Minnesota	Deltacoronavirus	Buldecovirus	Coronavirus HKU15	25394	Sus	Sus		Pigs	2013-10-14	Porcine deltacoronavirus strain USA/Minnesota/2013, complete genome		pig	tan2023
NC_011547.1	Hong Kong	Deltacoronavirus	Buldecovirus	Bulbul coronavirus HKU11	26487	Aves			Birds	2007-01-01	Bulbul coronavirus HKU11-934, complete genome		red-whiskered bulbul	tan2023
KJ584359.1	USA: Nebraska	Deltacoronavirus	Buldecovirus	Coronavirus HKU15	25422	Sus	Sus		Pigs	2014-02-21	Porcine coronavirus HKU15 strain NE3579, complete genome		pig	tan2023
MZ293754.1	Bangladesh	Betacoronavirus	Nobecovirus	Rousettus bat coronavirus GCCDC1	29100	Rousettus leschenaultii	Rousettus	leschenaultii	Bats	2008-10-02	Rousettus bat coronavirus isolate SBB-788, complete genome	mixed feces and urine	Rousettus leschenaultii	tan2023
ON128613.1	China	Betacoronavirus	Embecovirus	Human coronavirus HKU1	29883	Homo sapiens	Homo	sapiens	Humans	2018-09-30	Human coronavirus HKU1 isolate GZFE18139, complete genome		Homo sapiens	tan2023
LC687401.1	Japan: Fukushima	Alphacoronavirus	Setracovirus	Human coronavirus NL63	27550	Homo sapiens	Homo	sapiens	Humans	2021-01-01	Human coronavirus NL63 Fukushima_OR215_2021 RNA, complete genome	nasopharyngeal swab	Homo sapiens	tan2023
GQ153547.1		Betacoronavirus	Sarbecovirus	Severe acute respiratory syndrome-related coronavirus	29704	Chiroptera			Bats		Bat SARS coronavirus HKU3-12, complete genome		bat sars coronavirus hku3-12, complete genome	tan2023
MN644470.1	China	Alphacoronavirus	Pedacovirus	Porcine epidemic diarrhea virus	27953	Sus scrofa	Sus	scrofa	Pigs	2015-01-01	Porcine epidemic diarrhea virus strain HLJ, complete genome		Sus scrofa	tan2023
AY278487.3		Betacoronavirus	Sarbecovirus	Severe acute respiratory syndrome-related coronavirus	29745						SARS coronavirus BJ02, complete genome		sars coronavirus bj02, complete genome	tan2023
NC_006577.2		Betacoronavirus	Embecovirus	Human coronavirus HKU1	29926	Homo sapiens	Homo	sapiens	Humans		Human coronavirus HKU1, complete genome	patient with pneumonia	Homo sapiens	tan2023
MT984584.1	Hungary	Gammacoronavirus	Igacovirus	Avian coronavirus	27638	Gallus gallus	Gallus	gallus	Birds	2011-01-01	Avian coronavirus strain 211776/Imrehegy/2011/HU, complete genome		Gallus gallus	tan2023
MW532108.1	China	Betacoronavirus	Embecovirus	Betacoronavirus 1	30668	Homo sapiens	Homo	sapiens	Humans	2017-12-12	Human coronavirus OC43 strain OC43/China/07/2017, complete genome	nasopharyngeal swab	Homo sapiens	tan2023
MZ328297.1	China	Betacoronavirus	Unknown	Wenzhou Pipistrellus abramus betacoronavirus 1	30429	Pipistrellus abramus	Pipistrellus	abramus	Bats	2016-01-01	Wenzhou Pipistrellus abramus betacoronavirus 1, complete genome		Pipistrellus abramus	tan2023
FJ938053.1	Netherlands: Utrecht	Alphacoronavirus	Tegacovirus	Alphacoronavirus 1	29277	Felis	Felis		Felines	2007-04-25	Feline coronavirus UU7, complete genome		cat	tan2023
JQ989269.1	Hong Kong	Alphacoronavirus	Decacovirus	Bat coronavirus HKU10	28492	Chiroptera			Bats	2005-12-01	Hipposideros bat coronavirus HKU10 isolate LSH5A, complete genome		bat	tan2023
MG812378.1	USA: MN	Deltacoronavirus	Buldecovirus	Sparrow deltacoronavirus	25685	Aves			Birds	2017-01-01	Sparrow deltacoronavirus strain ISU73347, complete genome	fecal sample	sparrow	tan2023
NC_005831.2		Alphacoronavirus	Setracovirus	Human coronavirus NL63	27553	Homo	Homo		Humans		Human Coronavirus NL63, complete genome		human coronavirus nl63, complete genome	tan2023
KU131570.1	United Kingdom	Betacoronavirus	Embecovirus	Betacoronavirus 1	30746	Homo sapiens	Homo	sapiens	Humans	2011-08-20	Human coronavirus OC43 strain HCoV-OC43/UK/London/2011, complete genome	brain biopsy	Homo sapiens	tan2023
MH687942.1	Viet Nam	Alphacoronavirus	Unknown	Alphacoronavirus sp.	28321	Scotophilus kuhlii	Scotophilus	kuhlii	Bats	2014-06-17	Alphacoronavirus sp. strain VZ_AlphaCoV_16715_47_c2, complete genome		Scotophilus kuhlii	tan2023
MW532112.1	China	Betacoronavirus	Embecovirus	Betacoronavirus 1	30677	Homo sapiens	Homo	sapiens	Humans	2010-01-05	Human coronavirus OC43 strain OC43/China/03/2010, complete genome	nasopharyngeal swab	Homo sapiens	tan2023
MW308128.1	Germany: Kassel	Alphacoronavirus	Tegacovirus	Alphacoronavirus 1	29294	Felis	Felis		Felines	2006-01-01	Feline coronavirus isolate VP1a, complete genome	ascites collected from a cat with feline infectious peritonitis	cat	tan2023
MW345815.1	China	Deltacoronavirus	Unknown	Deltacoronavirus HNU1-2	26289	Aves			Birds		Deltacoronavirus HNU1-2, complete genome		common magpie	tan2023
MG913343.1	Brazil	Gammacoronavirus	Igacovirus	Avian coronavirus	27605	Gallus gallus	Gallus	gallus	Birds	2013-01-01	Avian coronavirus isolate AvCoV/Gallus gallus/Brazil/sample 22/2013, complete genome	pool of tracheas and lungs of Gallus gallus	Gallus gallus	tan2023
KY674916.1	USA	Alphacoronavirus	Setracovirus	Human coronavirus NL63	27492	Homo sapiens	Homo	sapiens	Humans	2016-01-01	Human coronavirus NL63 strain N07-64B, complete genome		Homo sapiens	tan2023
NC_006213.1	USA	Betacoronavirus	Embecovirus	Betacoronavirus 1	30741	Homo	Homo		Humans		Human coronavirus OC43 strain ATCC VR-759, complete genome		human coronavirus oc43 strain atcc vr-759, complete genome	tan2023
NC_016994.1	China: Hong Kong	Deltacoronavirus	Herdecovirus	Night heron coronavirus HKU19	26077	Aves			Birds	2007-01-01	Night-heron coronavirus HKU19, complete genome		night-heron	tan2023
FJ882942.1	USA: Tennessee	Betacoronavirus	Sarbecovirus	Severe acute respiratory syndrome-related coronavirus	29721					2008-11-26	SARS coronavirus MA15 ExoN1 isolate P3pp5, complete genome		sars coronavirus ma15 exon1 isolate p3pp5, complete genome	tan2023
OM410211.1	USA: North Carolina	Betacoronavirus	Sarbecovirus	Severe acute respiratory syndrome-related coronavirus	29654	Homo sapiens	Homo	sapiens	Humans	2022-01-10	Severe acute respiratory syndrome coronavirus 2 isolate SARS-CoV-2/human/USA/NC-CDC-LC0478417/2022, complete genome	Nasal Swabs	Homo sapiens	tan2023
MF618253.1	USA	Betacoronavirus	Embecovirus	Murine coronavirus	29893	Mus	Mus		Rodents	2014-01-16	Murine hepatitis virus strain A59 isolate MHV-ExoN(-) P250, complete genome		mouse	tan2023
LC654450.1	Japan: Fukushima	Betacoronavirus	Embecovirus	Betacoronavirus 1	30724	Homo sapiens	Homo	sapiens	Humans	2017-01-01	Human coronavirus OC43 Fukushima_O120_2017 RNA, complete genome		Homo sapiens	tan2023
KF686340.1	USA: Denver, CO	Betacoronavirus	Embecovirus	Human coronavirus HKU1	29923	Homo sapiens	Homo	sapiens	Humans	2009-11-28	Human coronavirus HKU1 strain HKU1/human/USA/HKU1-5/2009, complete genome		Homo sapiens	tan2023
LC494143.1	Japan	Betacoronavirus	Embecovirus	Betacoronavirus 1	30954	Bovinae			Bovines	2016-12-01	Bovine coronavirus IWT-19 RNA, complete genome		bovine coronavirus iwt-19 rna, complete genome	tan2023
KC461237.1	USA	Alphacoronavirus	Tegacovirus	Alphacoronavirus 1	29357	Felis catus	Felis	catus	Felines	2011-01-01	Feline infectious peritonitis virus isolate FCoVWSU791146_P50, complete genome		Felis catus	tan2023
KX361344.1	Thailand	Deltacoronavirus	Buldecovirus	Coronavirus HKU15	25406	Sus	Sus		Pigs	2013-03-01	Porcine deltacoronavirus isolate P2_13_ST2_0313/PDCoV/0213/Thailand, complete genome	intestine	pig	tan2023
FJ425186.1	USA: Ohio	Betacoronavirus	Embecovirus	Betacoronavirus 1	30962	Bovidae			Bovids	1994-01-01	Waterbuck coronavirus US/OH-WD358/1994, complete genome		waterbuck	tan2023
OK318917.1	China	Betacoronavirus	Embecovirus	Betacoronavirus 1	30675	Homo sapiens	Homo	sapiens	Humans	2019-08-10	Human coronavirus OC43 strain OC43/China/47/2019, complete genome	nasopharyngeal_swab	Homo sapiens	tan2023
HG994858.1		Betacoronavirus	Sarbecovirus	Severe acute respiratory syndrome-related coronavirus	29903						Severe acute respiratory syndrome-related coronavirus isolate H_SC_09 genome assembly, complete genome: monopartite		severe acute respiratory syndrome-related coronavirus isolate h_sc_09 genome assembly, complete genome: monopartite	tan2023
KF514409.1	USA: Nashville, TN	Betacoronavirus	Sarbecovirus	Severe acute respiratory syndrome-related coronavirus	29687					2009-07-08	SARS coronavirus wtic-MB strain SARS/VeroE6_lab/USA/WTic_c2P20/2009, complete genome		sars coronavirus wtic-mb strain sars/veroe6_lab/usa/wtic_c2p20/2009, complete genome	tan2023
KJ645705.1	USA: Minnesota	Alphacoronavirus	Pedacovirus	Porcine epidemic diarrhea virus	27998	Sus	Sus		Pigs	2013-11-18	Porcine epidemic diarrhea virus strain USA/Minnesota61/2013, complete genome	intestines	porcine	tan2023
NC_016996.1	China: Hong Kong	Deltacoronavirus	Buldecovirus	Common moorhen coronavirus HKU21	26223	Aves			Birds	2007-01-01	Common moorhen coronavirus HKU21, complete genome		common moorhen	tan2023
MT576585.1		Betacoronavirus	Merbecovirus	Middle East respiratory syndrome-related coronavirus	30115						Middle East respiratory syndrome-related coronavirus isolate MA_30, complete genome		middle east respiratory syndrome-related coronavirus isolate ma_30, complete genome	tan2023
MH687977.1	Viet Nam	Betacoronavirus	Unknown	Betacoronavirus sp.	31327	Rattus argentiventer	Rattus	argentiventer	Rodents	2015-02-04	Betacoronavirus sp. strain VZ_BetaCoV_22084_10, complete genome		Rattus argentiventer	tan2023
MK330604.1	China	Deltacoronavirus	Buldecovirus	Coronavirus HKU15	25402	Sus	Sus		Pigs	2017-02-01	Porcine deltacoronavirus strain CHN/Sichuan/2017, complete genome	feces	porcine	tan2023
AY278554.2	China: Hong Kong, Prince of Wales Hospital	Betacoronavirus	Sarbecovirus	Severe acute respiratory syndrome-related coronavirus	29736						SARS coronavirus CUHK-W1, complete genome	patient with Severe Acute Respiratory Syndrome (SARS)	sars coronavirus cuhk-w1, complete genome	tan2023
KX538972.1	Malaysia: Kuala Lumpur	Betacoronavirus	Embecovirus	Betacoronavirus 1	30713	Homo sapiens	Homo	sapiens	Humans	2012-07-04	Human coronavirus OC43 isolate MY-U774/12, complete genome	nasopharyngeal swab	Homo sapiens	tan2023
KF923918.1	China: Beijing	Betacoronavirus	Embecovirus	Betacoronavirus 1	30713	Homo sapiens	Homo	sapiens	Humans	2010-05-01	Human coronavirus OC43 isolate 10108/2010, complete genome	nasal and throat swab	Homo sapiens	tan2023
FJ904718.1	USA	Gammacoronavirus	Igacovirus	Avian coronavirus	27632	Aves			Birds	1983-01-01	Infectious bronchitis virus strain Conn46 1983, complete genome		chicken	tan2023
KU215424.1	Belgium	Alphacoronavirus	Tegacovirus	Alphacoronavirus 1	29253	Felis catus	Felis	catus	Felines	2013-01-01	Feline coronavirus isolate Cat1_day28_deletion, complete genome		Felis catus	tan2023
MT797634.1	Hong Kong	Alphacoronavirus	Duvinacovirus	Human coronavirus 229E	27261	Homo sapiens	Homo	sapiens	Humans	2020-01-01	Human coronavirus 229E isolate HK20-42, complete genome	nasopharyngeal swab	Homo sapiens	tan2023
MN520200.1	China: Anhui	Deltacoronavirus	Buldecovirus	Coronavirus HKU15	25404	Sus	Sus		Pigs	2018-01-01	UNVERIFIED: Porcine deltacoronavirus isolate AH2018-94, complete genome		unverified: porcine deltacoronavirus isolate ah2018-94, complete genome	tan2023
MW351626.1	China	Gammacoronavirus	Igacovirus	Avian coronavirus	27692	Aves			Birds	2019-01-01	Avian coronavirus isolate IBV-rSD-K278A, complete genome		chicken	tan2023
JN183882.1	Netherlands: Utrecht	Alphacoronavirus	Tegacovirus	Alphacoronavirus 1	29243	Felis catus	Felis	catus	Felines	2010-07-14	Feline coronavirus UU47, complete genome		Felis catus	tan2023
OW111301.2	United Kingdom:England	Betacoronavirus	Sarbecovirus	Severe acute respiratory syndrome-related coronavirus	29873	Homo sapiens	Homo	sapiens	Humans	2021-12-28	Severe acute respiratory syndrome coronavirus 2 genome assembly, complete genome: monopartite		Homo sapiens	tan2023
MN548285.2	United Kingdom	Gammacoronavirus	Igacovirus	Avian coronavirus	27736	Gallus gallus	Gallus	gallus	Birds	2011-01-01	Infectious bronchitis virus strain CR88, complete genome		Gallus gallus	tan2023
MK211372.1	China	Alphacoronavirus	Pedacovirus	Coronavirus BtSk-AlphaCoV/GX2018D	28238	Scotophilus kuhlii	Scotophilus	kuhlii	Bats	2017-05-01	Coronavirus BtSk-AlphaCoV/GX2018D, complete genome		Scotophilus kuhlii	tan2023
KF514419.1	USA: Nashville, TN	Betacoronavirus	Sarbecovirus	Severe acute respiratory syndrome-related coronavirus	29687					2009-05-19	SARS coronavirus wtic-MB strain SARS/VeroE6_lab/USA/WTic_c1P10/2009, complete genome		sars coronavirus wtic-mb strain sars/veroe6_lab/usa/wtic_c1p10/2009, complete genome	tan2023
MT821905.1	Italy	Alphacoronavirus	Tegacovirus	Alphacoronavirus 1	28081	Sus scrofa	Sus	scrofa	Pigs	2019-03-04	Swine enteric coronavirus strain Italy/77590/2019, complete genome		Sus scrofa	tan2023
AY362698.1		Betacoronavirus	Sarbecovirus	Severe acute respiratory syndrome-related coronavirus	29727						SARS coronavirus TWC2, complete genome		sars coronavirus twc2, complete genome	tan2023
KT381613.1	USA: Ohio	Deltacoronavirus	Buldecovirus	Coronavirus HKU15	25422	Sus	Sus		Pigs	2014-05-07	Porcine coronavirus HKU15 strain OH11846, complete genome		pig	tan2023
MT747187.1	China	Alphacoronavirus	Rhinacovirus	Swine acute diarrhea syndrome coronavirus	27163	Sus	Sus		Pigs	2017-02-01	Swine acute diarrhea syndrome coronavirus isolate SADS-CoV/CN/GDDE/2017, complete genome	small intestine	swine	tan2023
MW532117.1	China	Betacoronavirus	Embecovirus	Betacoronavirus 1	30695	Homo sapiens	Homo	sapiens	Humans	2017-06-05	Human coronavirus OC43 strain OC43/China/11/2017, complete genome	nasopharyngeal swab	Homo sapiens	tan2023
MK211379.1	China	Betacoronavirus	Nobecovirus	Coronavirus BtRt-BetaCoV/GX2018	29752	Rhinolophus affinis	Rhinolophus	affinis	Bats	2016-09-01	Coronavirus BtRt-BetaCoV/GX2018, complete genome		Rhinolophus affinis	tan2023
MF598662.1	United Arab Emirates	Betacoronavirus	Merbecovirus	Middle East respiratory syndrome-related coronavirus	30123	Camelus dromedarius	Camelus	dromedarius	Camelids	2015-03-01	Middle East respiratory syndrome-related coronavirus strain camel/UAE_B72_2015, complete genome	nasopharyngeal swab	Camelus dromedarius	tan2023
HQ012372.1	Netherlands	Alphacoronavirus	Tegacovirus	Alphacoronavirus 1	29216	Felis catus	Felis	catus	Felines	2007-09-11	Feline coronavirus UU34, complete genome		Felis catus	tan2023
MW202339.1	USA	Betacoronavirus	Embecovirus	Betacoronavirus 1	28861	Homo sapiens	Homo	sapiens	Humans	2018-01-01	MAG: Human coronavirus OC43 isolate OC43_S219, complete genome		Homo sapiens	tan2023
KY581692.1	United Arab Emirates	Betacoronavirus	Merbecovirus	Middle East respiratory syndrome-related coronavirus	30123	Homo sapiens	Homo	sapiens	Humans	2014-04-15	Middle East respiratory syndrome-related coronavirus strain Hu/UAE_025_2014, complete genome	sputum	Homo sapiens	tan2023
MG596802.1	Italy	Betacoronavirus	Merbecovirus	Middle East respiratory syndrome-related coronavirus	30048	Hypsugo savii	Hypsugo	savii	Bats	2011-01-01	Middle East respiratory syndrome-related coronavirus isolate Bat-CoV/H.savii/Italy/206645-40/2011, complete genome	carcass	Hypsugo savii	tan2023
AY545918.1	China	Betacoronavirus	Sarbecovirus	Severe acute respiratory syndrome-related coronavirus	29737						SARS coronavirus isolate HC/GZ/32/03, complete genome		sars coronavirus isolate hc/gz/32/03, complete genome	tan2023
GQ153545.1		Betacoronavirus	Sarbecovirus	Severe acute respiratory syndrome-related coronavirus	29695	Chiroptera			Bats		Bat SARS coronavirus HKU3-10, complete genome		bat sars coronavirus hku3-10, complete genome	tan2023
MH687959.1	Viet Nam	Alphacoronavirus	Unknown	Alphacoronavirus sp.	28169	Scotophilus kuhlii	Scotophilus	kuhlii	Bats	2014-11-12	Alphacoronavirus sp. strain VZ_AlphaCoV_17819_17, complete genome		Scotophilus kuhlii	tan2023
MG197710.1	China	Betacoronavirus	Embecovirus	Betacoronavirus 1	30544	Homo	Homo		Humans	2015-05-06	Human coronavirus OC43 strain BJ-124, complete genome	throat swabs or nasopharyngeal aspirates	human coronavirus oc43 strain bj-124, complete genome	tan2023
KJ473806.1	China	Alphacoronavirus	Myotacovirus	Myotis ricketti alphacoronavirus Sax-2011	27935	Myotis ricketti	Myotis	ricketti	Bats	2011-01-01	BtMr-AlphaCoV/SAX2011, complete genome		Myotis ricketti	tan2023
MZ293736.1	Republic of the Congo	Unknown	Unknown	Triaenops bat coronavirus	28723	Triaenops afer	Triaenops	afer	Bats	2012-07-30	Triaenops bat coronavirus isolate PREDICT/GCS-019, complete genome	rectal swab	Triaenops afer	tan2023
MK334046.1	China	Alphacoronavirus	Setracovirus	Human coronavirus NL63	27531	Homo sapiens	Homo	sapiens	Humans	2018-09-01	Human coronavirus NL63 strain ChinaGD01, complete genome	nasopharyngeal swab	Homo sapiens	tan2023
MW246798.1	Italy	Betacoronavirus	Unknown	Betacoronavirus Erinaceus	30885	Erinaceus europaeus	Erinaceus	europaeus	Hedgehogs	2018-01-01	Betacoronavirus Erinaceus isolate ErinaceusCoV/Italy/50265-17/2018, complete genome	feces	Erinaceus europaeus	tan2023
FJ884687.1	USA: Pennsylvania	Betacoronavirus	Embecovirus	Murine coronavirus	31277	Mus	Mus		Rodents		Murine hepatitis virus strain A59 B12 variant, complete genome		mouse	tan2023
JQ316196.1	United Kingdom	Betacoronavirus	Sarbecovirus	Severe acute respiratory syndrome-related coronavirus	29727					2003-04-16	SARS coronavirus HKU-39849 isolate UOB, complete genome		sars coronavirus hku-39849 isolate uob, complete genome	tan2023
MF462814.1	China	Alphacoronavirus	Pedacovirus	Porcine epidemic diarrhea virus	28063	Sus	Sus		Pigs	2016-09-10	Porcine epidemic diarrhea virus strain CH/SXYL/2016, complete genome		porcine	tan2023
OK017852.1	China: Yunnan	Betacoronavirus	Sarbecovirus	Sarbecovirus sp.	29365	Rhinolophus sinicus	Rhinolophus	sinicus	Bats	2020-06-01	Sarbecovirus sp. isolate YN2020B, complete genome		Rhinolophus sinicus	tan2023
AY559087.1	Singapore	Betacoronavirus	Sarbecovirus	Severe acute respiratory syndrome-related coronavirus	29716						SARS coronavirus Sin3725V, complete genome		sars coronavirus sin3725v, complete genome	tan2023
AY394989.1		Betacoronavirus	Sarbecovirus	Severe acute respiratory syndrome-related coronavirus	29736						SARS coronavirus HZS2-D, complete genome		sars coronavirus hzs2-d, complete genome	tan2023
KT368908.1	Saudi Arabia	Alphacoronavirus	Duvinacovirus	Human coronavirus 229E	27395	Camelus	Camelus		Camelids	2015-03-01	Camel alphacoronavirus isolate camel/Riyadh/Ry159(a)/2015, complete genome		camel	tan2023
KX900407.1	USA: Minnesota	Alphacoronavirus	Tegacovirus	Alphacoronavirus 1	28521	Sus	Sus		Pigs	2013-03-01	Transmissible gastroenteritis virus strain TGEV/USA/Minnesota150/2013, complete genome	feces	transmissible gastroenteritis virus strain tgev/usa/minnesota150/2013, complete genome	tan2023
AY884001.1		Betacoronavirus	Embecovirus	Human coronavirus HKU1	29815	Homo	Homo		Humans		Human coronavirus HKU1 genotype B, complete genome		human coronavirus hku1 genotype b, complete genome	tan2023
JN129835.1	China: Hong Kong	Betacoronavirus	Embecovirus	Betacoronavirus 1	30722	Homo sapiens	Homo	sapiens	Humans	2004-11-01	Human coronavirus OC43 strain HK04-02, complete genome		Homo sapiens	tan2023
HQ392470.1	Netherlands: Utrecht	Alphacoronavirus	Tegacovirus	Alphacoronavirus 1	29255	Felinae			Felines	2007-08-23	Feline coronavirus UU19, complete genome		feline	tan2023
JN874559.1	China	Betacoronavirus	Embecovirus	Rabbit coronavirus HKU14	31100	Oryctolagus cuniculus	Oryctolagus	cuniculus	Lagomorphs	2006-01-01	Rabbit coronavirus HKU14 strain HKU14-1, complete genome		Oryctolagus cuniculus	tan2023
KC545386.1	Germany	Betacoronavirus	Merbecovirus	Hedgehog coronavirus 1	30175	Erinaceus europaeus	Erinaceus	europaeus	Hedgehogs	2012-01-01	Betacoronavirus Erinaceus/VMC/DEU/2012 isolate ErinaceusCoV/2012-216/GER/2012, complete genome	feces	Erinaceus europaeus	tan2023
KJ425504.1	China	Gammacoronavirus	Igacovirus	Avian coronavirus	27485	Gallus gallus	Gallus	gallus	Birds	2009-12-05	Infectious bronchitis virus strain ck/CH/LHLJ/091205, complete genome		Gallus gallus	tan2023
HQ392472.1	Netherlands: Utrecht	Alphacoronavirus	Tegacovirus	Alphacoronavirus 1	29233	Felinae			Felines	2008-01-22	Feline coronavirus UU30, complete genome		feline	tan2023
KX900398.1	USA: Minnesota	Alphacoronavirus	Tegacovirus	Alphacoronavirus 1	28521	Sus	Sus		Pigs	2007-02-08	Transmissible gastroenteritis virus strain TGEV/USA/Minnesota141/2007, complete genome	intestine	transmissible gastroenteritis virus strain tgev/usa/minnesota141/2007, complete genome	tan2023
MN611522.1	China	Alphacoronavirus	Rhinacovirus	Rhinolophus affinis bat coronavirus HKU2-related	26956	Rhinolophus affinis	Rhinolophus	affinis	Bats	2018-03-01	Rhinolophus affinis bat coronavirus HKU2-related isolate 160660, complete genome		Rhinolophus affinis	tan2023
MZ325299.1	Cote d'Ivoire	Gammacoronavirus	Igacovirus	Avian coronavirus	27639	Gallus gallus	Gallus	gallus	Birds	2013-01-01	Avian coronavirus strain D2334/11/2/13/CI, complete genome		Gallus gallus	tan2023
MF769432.1	China	Alphacoronavirus	Rhinacovirus	Swine acute diarrhea syndrome coronavirus	27173	Sus	Sus		Pigs	2017-01-01	Swine acute diarrhea syndrome coronavirus isolate 89, complete genome		swine	tan2023
KF686344.1	USA: Denver, CO	Betacoronavirus	Embecovirus	Human coronavirus HKU1	29695	Homo sapiens	Homo	sapiens	Humans	2009-12-28	Human coronavirus HKU1 strain HKU1/human/USA/HKU1-15/2009, complete genome		Homo sapiens	tan2023
KY554971.1	USA	Alphacoronavirus	Setracovirus	Human coronavirus NL63	27550	Homo sapiens	Homo	sapiens	Humans	2016-01-01	Human coronavirus NL63 strain N07-468B_176X, complete genome		Homo sapiens	tan2023
AY463060.1		Betacoronavirus	Sarbecovirus	Severe acute respiratory syndrome-related coronavirus	29013						SARS coronavirus ShanghaiQXC2, complete genome		sars coronavirus shanghaiqxc2, complete genome	tan2023
KF793825.1		Gammacoronavirus	Cegacovirus	Beluga whale coronavirus SW1	31766	Tursiops	Tursiops		Cetaceans		Bottlenose dolphin coronavirus HKU22 isolate CF090327, complete genome		bottlenose dolphin coronavirus hku22 isolate cf090327, complete genome	tan2023
AY772062.1		Betacoronavirus	Sarbecovirus	Severe acute respiratory syndrome-related coronavirus	29461						SARS coronavirus WH20, complete genome		sars coronavirus wh20, complete genome	tan2023
MN520194.1	China: Shandong	Deltacoronavirus	Buldecovirus	Coronavirus HKU15	25420	Sus	Sus		Pigs	2018-10-01	UNVERIFIED: Porcine deltacoronavirus isolate SD2018-10, complete genome		unverified: porcine deltacoronavirus isolate sd2018-10, complete genome	tan2023
LC494132.1	Japan	Betacoronavirus	Embecovirus	Betacoronavirus 1	30954	Bovinae			Bovines	2011-06-01	Bovine coronavirus IWT-4 RNA, complete genome		bovine coronavirus iwt-4 rna, complete genome	tan2023
MZ380242.1	Egypt	Betacoronavirus	Sarbecovirus	Severe acute respiratory syndrome-related coronavirus	29903	Homo sapiens	Homo	sapiens	Humans	2021-05-01	Severe acute respiratory syndrome coronavirus 2 isolate SARS-CoV-2/human/EGY/CCHE57357_Wave_3_A001/2021, complete genome	nasal swab	Homo sapiens	tan2023
OM950729.1	China	Alphacoronavirus	Tegacovirus	Alphacoronavirus 1	29366	Canis	Canis		Canines	2020-01-01	Canine coronavirus isolate GH4-2, complete genome		raccoon dog	tan2023
KJ645671.1	USA: Minnesota	Alphacoronavirus	Pedacovirus	Porcine epidemic diarrhea virus	27998	Sus	Sus		Pigs	2013-11-30	Porcine epidemic diarrhea virus strain USA/Minnesota76/2013, complete genome	feces	porcine	tan2023
MZ081388.1	China	Alphacoronavirus	Unknown	Alphacoronavirus sp.	29068	Hipposideros larvatus	Hipposideros	larvatus	Bats	2020-07-28	Alphacoronavirus sp. strain bat/Yunnan/HlYN23/2020, complete genome	bat feces	Hipposideros larvatus	tan2023
OK017839.1	China: Jiangxi	Betacoronavirus	Sarbecovirus	Sarbecovirus sp.	29528	Rhinolophus sinicus	Rhinolophus	sinicus	Bats	2021-07-01	Sarbecovirus sp. isolate JX2021J, complete genome		Rhinolophus sinicus	tan2023
KU215419.1	Belgium	Alphacoronavirus	Tegacovirus	Alphacoronavirus 1	29262	Felis catus	Felis	catus	Felines	2013-01-01	Feline coronavirus isolate inoculum, complete genome		Felis catus	tan2023
OK017857.1	China: Yunnan	Betacoronavirus	Sarbecovirus	Sarbecovirus sp.	29183	Rhinolophus sinicus	Rhinolophus	sinicus	Bats	2020-06-01	Sarbecovirus sp. isolate YN2020G, complete genome		Rhinolophus sinicus	tan2023
MT984591.1	Romania	Gammacoronavirus	Igacovirus	Avian coronavirus	27604	Gallus gallus	Gallus	gallus	Birds	2011-01-01	Avian coronavirus strain D1654/1/4/2011/RO, complete genome		Gallus gallus	tan2023
GU553361.1	Netherlands	Alphacoronavirus	Tegacovirus	Alphacoronavirus 1	29264	Felinae			Felines	2007-09-13	Feline coronavirus UU22 isolate TCVSP-ROTTIER-00022, complete genome		feline	tan2023
KU291448.1	Germany	Alphacoronavirus	Duvinacovirus	Human coronavirus 229E	27022	Homo sapiens	Homo	sapiens	Humans	2015-01-01	Human coronavirus 229E isolate HCoV-229E/BN1/GER/2015, complete genome		Homo sapiens	tan2023
MT040336.1	China	Betacoronavirus	Sarbecovirus	Pangolin coronavirus	29802	Manis javanica	Manis	javanica	Pangolins	2017-01-01	Pangolin coronavirus isolate PCoV_GX-P5E, complete genome		Manis javanica (Malayan pangolin)	tan2023
KY354364.1	South Korea: Kyunggido	Deltacoronavirus	Buldecovirus	Coronavirus HKU15	25422	Sus	Sus		Pigs	2016-04-01	Porcine deltacoronavirus isolate DH2, complete genome		porcine	tan2023
MH687969.1	Viet Nam	Betacoronavirus	Unknown	Betacoronavirus sp.	31352	Rattus argentiventer	Rattus	argentiventer	Rodents	2014-11-12	Betacoronavirus sp. strain VZ_BetaCoV_20724_33, complete genome		Rattus argentiventer	tan2023
DQ288927.1		Gammacoronavirus	Igacovirus	Avian coronavirus	27534	Aves			Birds		Avian infectious bronchitis virus isolate SAIBK, complete genome		avian infectious bronchitis virus isolate saibk, complete genome	tan2023
AY502929.1	Taiwan	Betacoronavirus	Sarbecovirus	Severe acute respiratory syndrome-related coronavirus	29729						SARS coronavirus TW6, complete genome		sars coronavirus tw6, complete genome	tan2023
LC494166.1	Japan	Betacoronavirus	Embecovirus	Betacoronavirus 1	30934	Bovinae			Bovines	2008-12-01	Bovine coronavirus TCG-11 RNA, complete genome		bovine coronavirus tcg-11 rna, complete genome	tan2023
OM994417.1	China	Alphacoronavirus	Rhinacovirus	Swine enteric alphacoronavirus	27155	Sus	Sus		Pigs	2017-01-01	Swine enteric alphacoronavirus strain SeACoV-p0, complete genome	fecal sample	swine	tan2023
FJ882930.1	USA: Tennessee	Betacoronavirus	Sarbecovirus	Severe acute respiratory syndrome-related coronavirus	29687					2007-09-22	SARS coronavirus ExoN1, complete genome		sars coronavirus exon1, complete genome	tan2023
KX219798.1	China	Gammacoronavirus	Igacovirus	Avian coronavirus	27682	Gallus gallus	Gallus	gallus	Birds	2012-09-01	Infectious bronchitis virus strain ck/CH/LSD/120913, complete genome		Gallus gallus	tan2023
MT906864.1	United Kingdom	Alphacoronavirus	Tegacovirus	Alphacoronavirus 1	29437	Canis	Canis		Canines	2020-01-01	Canine coronavirus strain 2020/15, complete genome	feces	domestic dog	tan2023
MW532119.1	China	Betacoronavirus	Embecovirus	Betacoronavirus 1	30689	Homo sapiens	Homo	sapiens	Humans	2017-11-03	Human coronavirus OC43 strain OC43/China/10/2017, complete genome	nasopharyngeal swab	Homo sapiens	tan2023
JF792617.1		Betacoronavirus	Embecovirus	Murine coronavirus	31274	Rattus	Rattus		Rodents		Rat coronavirus isolate 8190, complete genome		rat	tan2023
MT039231.1		Alphacoronavirus	Rhinacovirus	Swine acute diarrhea syndrome coronavirus	27171	Sus	Sus		Pigs		Mutant Swine acute diarrhea syndrome coronavirus strain icSADS, complete genome		pig	tan2023
MN690608.1	USA	Gammacoronavirus	Cegacovirus	Bottlenose dolphin coronavirus	31728	Tursiops	Tursiops		Cetaceans		Bottlenose dolphin coronavirus strain 37112-1, complete genome	feces	bottlenose dolphin	tan2023
KR265775.1	USA: Minnesota	Alphacoronavirus	Pedacovirus	Porcine epidemic diarrhea virus	27991	Sus	Sus		Pigs	2014-01-09	Porcine epidemic diarrhea virus strain USA/Minnesota338/2014 from USA, complete genome	ints	pig	tan2023
OK500299.1	China	Betacoronavirus	Embecovirus	Betacoronavirus 1	30618	Homo sapiens	Homo	sapiens	Humans	2019-11-12	Human coronavirus OC43 strain OC43/China/55/2019, complete genome	nasopharyngeal_swab	Homo sapiens	tan2023
KF530099.1	USA: Nashville, TN	Betacoronavirus	Embecovirus	Betacoronavirus 1	30578	Homo sapiens	Homo	sapiens	Humans	1997-01-02	Human coronavirus OC43 strain OC43/human/USA/971-5/1997, complete genome		Homo sapiens; sex: F; age: 59Y	tan2023
MZ293746.1	Bangladesh	Unknown	Unknown	Megaderma bat coronavirus	27288	Megaderma lyra	Megaderma	lyra	Bats	2012-10-19	Megaderma bat coronavirus isolate SBB-024, complete genome	rectal swab	Megaderma lyra	tan2023
KF514389.1	USA: Nashville, TN	Betacoronavirus	Sarbecovirus	Severe acute respiratory syndrome-related coronavirus	29687					2009-05-19	SARS coronavirus ExoN1 strain SARS/VeroE6_lab/USA/ExoN1_c8P10/2009, complete genome		sars coronavirus exon1 strain sars/veroe6_lab/usa/exon1_c8p10/2009, complete genome	tan2023
DQ415898.1	China: Hong Kong	Betacoronavirus	Embecovirus	Human coronavirus HKU1	29815	Homo	Homo		Humans		Human coronavirus HKU1 strain N21 genotype C, complete genome	nasopharyngeal aspirates of patients diagnosed respiratory tract infection diseases	human coronavirus hku1 strain n21 genotype c, complete genome	tan2023
MH687939.1	Viet Nam	Alphacoronavirus	Unknown	Alphacoronavirus sp.	28307	Scotophilus kuhlii	Scotophilus	kuhlii	Bats	2014-06-17	Alphacoronavirus sp. strain VZ_AlphaCoV_16715_39_c2, complete genome		Scotophilus kuhlii	tan2023
DQ001338.1		Gammacoronavirus	Igacovirus	Avian coronavirus	27613	Aves			Birds		Avian infectious bronchitis virus isolate IBV-EP3, complete genome	chicken embryo cell passage 3	avian infectious bronchitis virus isolate ibv-ep3, complete genome	tan2023
MH687961.1	Viet Nam	Alphacoronavirus	Unknown	Alphacoronavirus sp.	28168	Scotophilus kuhlii	Scotophilus	kuhlii	Bats	2014-11-13	Alphacoronavirus sp. strain VZ_AlphaCoV_17819_4, complete genome		Scotophilus kuhlii	tan2023
KP143509.1	United Kingdom	Alphacoronavirus	Tegacovirus	Alphacoronavirus 1	28968	Felis catus	Felis	catus	Felines	2013-01-01	Feline coronavirus isolate 65F, complete genome		Felis catus	tan2023
KF514399.1	USA: Nashville, TN	Betacoronavirus	Sarbecovirus	Severe acute respiratory syndrome-related coronavirus	29687					2010-10-01	SARS coronavirus wtic-MB strain SARS/VeroE6_lab/USA/WTic_c1.1P20/2010, complete genome		sars coronavirus wtic-mb strain sars/veroe6_lab/usa/wtic_c1.1p20/2010, complete genome	tan2023
KY417148.1	China	Betacoronavirus	Sarbecovirus	Severe acute respiratory syndrome-related coronavirus	29743	Rhinolophus sinicus	Rhinolophus	sinicus	Bats	2013-04-17	Bat SARS-like coronavirus isolate Rs4247, complete genome		Rhinolophus sinicus	tan2023
LC494154.1	Japan	Betacoronavirus	Embecovirus	Betacoronavirus 1	30936	Bovinae			Bovines	2014-09-01	Bovine coronavirus SHG-1 RNA, complete genome		bovine coronavirus shg-1 rna, complete genome	tan2023
KF530087.1	USA: Nashville, TN	Betacoronavirus	Embecovirus	Betacoronavirus 1	30577	Homo sapiens	Homo	sapiens	Humans	1987-03-05	Human coronavirus OC43 strain OC43/human/USA/873-6/1987, complete genome		Homo sapiens; sex: M; age: 6Y	tan2023
AY394997.1		Betacoronavirus	Sarbecovirus	Severe acute respiratory syndrome-related coronavirus	29683						SARS coronavirus ZS-A, complete genome		sars coronavirus zs-a, complete genome	tan2023
FJ882951.1	USA: Tennessee	Betacoronavirus	Sarbecovirus	Severe acute respiratory syndrome-related coronavirus	29721					2008-11-26	SARS coronavirus MA15 ExoN1 isolate P3pp3, complete genome		sars coronavirus ma15 exon1 isolate p3pp3, complete genome	tan2023
JF292915.1	USA: Nashville, TN	Betacoronavirus	Sarbecovirus	Severe acute respiratory syndrome-related coronavirus	29646	Mus musculus	Mus	musculus	Rodents	2008-10-10	SARS coronavirus MA15 isolate d4ym5, complete genome		Mus musculus; young	tan2023
KY674921.1	USA	Betacoronavirus	Embecovirus	Human coronavirus HKU1	29820	Homo sapiens	Homo	sapiens	Humans	2016-01-01	Human coronavirus HKU1 strain N08-87, complete genome		Homo sapiens	tan2023
MZ081387.1	China	Alphacoronavirus	Unknown	Alphacoronavirus sp.	29100	Rhinolophus malayanus	Rhinolophus	malayanus	Bats	2020-06-03	Alphacoronavirus sp. strain bat/Yunnan/RmYN21/2020, complete genome	bat feces	Rhinolophus malayanus	tan2023
JF792616.1		Betacoronavirus	Embecovirus	Murine coronavirus	31286	Rattus	Rattus		Rodents		Rat coronavirus isolate 681, complete genome		rat	tan2023
KY770851.1	China	Unknown	Unknown	Bat coronavirus	28096	Myotis davidii	Myotis	davidii	Bats	2013-01-01	Bat coronavirus isolate Anlong-57, complete genome		Myotis davidii	tan2023
KJ473795.1	China	Alphacoronavirus	Minunacovirus	Miniopterus bat coronavirus 1	28310	Miniopterus fuliginosus	Miniopterus	fuliginosus	Bats	2011-01-01	BtMf-AlphaCoV/AH2011, complete genome		Miniopterus fuliginosus	tan2023
LC063816.1	Japan: Okinawa	Alphacoronavirus	Pedacovirus	Porcine epidemic diarrhea virus	27904	Sus scrofa	Sus	scrofa	Pigs	2014-02-01	Porcine epidemic diarrhea virus genomic RNA, complete genome, strain: OKN-2/JPN/2014		Sus scrofa domesticus	tan2023
FJ647221.1	USA: Pennsylvania	Betacoronavirus	Embecovirus	Murine coronavirus	31456	Mus musculus	Mus	musculus	Rodents		Murine coronavirus repA59/RJHM, complete genome		Mus musculus	tan2023
MZ100070.1	Canada	Betacoronavirus	Unknown	Tapir coronavirus 1044512-1	31016	Tapirus	Tapirus		Tapirs	2021-01-01	Tapir coronavirus 1044512-1, complete genome	fecal sample	tapir	tan2023
AY323977.2	Italy	Betacoronavirus	Sarbecovirus	Severe acute respiratory syndrome-related coronavirus	29751						SARS coronavirus HSR 1, complete genome	second passage virus isolate grown in VERO cells inoculated with sputum sample from Italian patient	sars coronavirus hsr 1, complete genome	tan2023
AY357075.1		Betacoronavirus	Sarbecovirus	Severe acute respiratory syndrome-related coronavirus	29738						SARS coronavirus PUMC02, complete genome		sars coronavirus pumc02, complete genome	tan2023
KC881005.1	China	Betacoronavirus	Sarbecovirus	Severe acute respiratory syndrome-related coronavirus	29787	Rhinolophus sinicus	Rhinolophus	sinicus	Bats	2011-04-17	Bat SARS-like coronavirus RsSHC014, complete genome		Rhinolophus sinicus	tan2023
KY621348.1	USA	Alphacoronavirus	Duvinacovirus	Human coronavirus 229E	27144	Homo sapiens	Homo	sapiens	Humans	2016-01-01	Human coronavirus 229E strain HCoV_229E/Seattle/USA/SC379/2016, complete genome		Homo sapiens	tan2023
MF769439.1	China	Alphacoronavirus	Rhinacovirus	Swine acute diarrhea syndrome coronavirus	27173	Sus	Sus		Pigs	2017-01-01	Swine acute diarrhea syndrome coronavirus isolate 189, complete genome		swine	tan2023
KT368915.1	Saudi Arabia	Alphacoronavirus	Duvinacovirus	Human coronavirus 229E	27392	Camelus	Camelus		Camelids	2015-03-01	Camel alphacoronavirus isolate camel/Taif/T157(a)/2015, complete genome		camel	tan2023
MZ158814.1	USA: Minnesota	Betacoronavirus	Sarbecovirus	Severe acute respiratory syndrome-related coronavirus	29882	Homo sapiens	Homo	sapiens	Humans	2021-03-28	Severe acute respiratory syndrome coronavirus 2 isolate SARS-CoV-2/human/USA/MN-CDC-ASC210025862/2021, complete genome	Nasal - Anterior Nares	Homo sapiens	tan2023
KR265856.1	USA: Illinois	Deltacoronavirus	Buldecovirus	Coronavirus HKU15	25399	Sus	Sus		Pigs	2014-02-23	Porcine deltacoronavirus strain USA/Illinois272/2014, complete genome		pig	tan2023
KJ473797.1	China	Alphacoronavirus	Minunacovirus	Miniopterus bat coronavirus HKU8	28758	Miniopterus fuliginosus	Miniopterus	fuliginosus	Bats	2012-01-01	BtMf-AlphaCoV/GD2012, complete genome		Miniopterus fuliginosus	tan2023
MT460496.1	China	Gammacoronavirus	Igacovirus	Avian coronavirus	27642	Aves			Birds		Infectious bronchitis virus isolate CK/CH/LAH/1806, complete genome		chicken	tan2023
AY714217.1	USA	Betacoronavirus	Sarbecovirus	Severe acute respiratory syndrome-related coronavirus	29727						SARS Coronavirus CDC#200301157, complete genome	sputum of SARS patient clinical specimen #809940	sars coronavirus cdc#200301157, complete genome	tan2023
OX083981.1	United Kingdom:England	Betacoronavirus	Sarbecovirus	Severe acute respiratory syndrome-related coronavirus	29873	Homo sapiens	Homo	sapiens	Humans	2022-02-13	Severe acute respiratory syndrome coronavirus 2 genome assembly, complete genome: monopartite		Homo sapiens	tan2023
DQ001339.1		Gammacoronavirus	Igacovirus	Avian coronavirus	27611	Aves			Birds		Avian infectious bronchitis virus isolate IBV-p65, complete genome	Vero cell passage 65	avian infectious bronchitis virus isolate ibv-p65, complete genome	tan2023
EU371560.1		Betacoronavirus	Sarbecovirus	Severe acute respiratory syndrome-related coronavirus	29731						SARS coronavirus BJ182a, complete genome		sars coronavirus bj182a, complete genome	tan2023
AY304486.1	Hong Kong	Betacoronavirus	Sarbecovirus	Severe acute respiratory syndrome-related coronavirus	29741						SARS coronavirus SZ3, complete genome		sars coronavirus sz3, complete genome	tan2023
KF906251.1	United Arab Emirates: Dubai	Betacoronavirus	Embecovirus	Betacoronavirus 1	31052	Camelus	Camelus		Camelids	2013-05-21	Dromedary camel coronavirus HKU23 strain HKU23-368F, complete genome		dromedary camel	tan2023
KF514397.1	USA: Nashville, TN	Betacoronavirus	Sarbecovirus	Severe acute respiratory syndrome-related coronavirus	29687					2009-05-19	SARS coronavirus wtic-MB strain SARS/VeroE6_lab/USA/WTic_c2P10/2009, complete genome		sars coronavirus wtic-mb strain sars/veroe6_lab/usa/wtic_c2p10/2009, complete genome	tan2023
MH817484.1	Brazil	Alphacoronavirus	Tegacovirus	Feline alphacoronavirus 1	29137	Felis catus	Felis	catus	Felines	2015-01-01	Feline alphacoronavirus 1 strain FCoV-SB22, complete genome	feline pool stool	Felis catus	tan2023
KF530076.1	USA: Nashville, TN	Betacoronavirus	Embecovirus	Betacoronavirus 1	30606	Homo sapiens	Homo	sapiens	Humans	1991-01-03	Human coronavirus OC43 strain OC43/human/USA/911-11/1991, complete genome		Homo sapiens; sex: F; age: 11Y	tan2023
AY864806.1		Betacoronavirus	Sarbecovirus	Severe acute respiratory syndrome-related coronavirus	29751						SARS coronavirus BJ202, complete genome		sars coronavirus bj202, complete genome	tan2023
MG772934.1	China	Betacoronavirus	Sarbecovirus	Severe acute respiratory syndrome-related coronavirus	29732	Rhinolophus pusillus	Rhinolophus	pusillus	Bats	2015-07-01	Bat SARS-like coronavirus isolate bat-SL-CoVZXC21, complete genome		Rhinolophus pusillus	tan2023
KU558923.1	Bangladesh	Betacoronavirus	Embecovirus	Betacoronavirus 1	30985	Bubalus bubalis	Bubalus	bubalis	Bovines	2014-10-01	Betacoronavirus 1 isolate Buffalo coronavirus B1-28F, complete genome		Bubalus bubalis	tan2023
OM912678.1	Mexico: South	Gammacoronavirus	Igacovirus	Avian coronavirus	27634	Gallus gallus	Gallus	gallus	Birds	2020-11-25	Infectious bronchitis virus isolate IBV/ck/MEX/2359/20, complete genome	choanal cleft/lung swab; 42-day-old chicken	Gallus gallus domesticus (broiler); SEPRL-ID:2359	tan2023
DQ412042.1		Betacoronavirus	Sarbecovirus	Severe acute respiratory syndrome-related coronavirus	29709	Rhinolophus ferrumequinum	Rhinolophus	ferrumequinum	Bats		Bat SARS coronavirus Rf1, complete genome		Rhinolophus ferrumequinum	tan2023
MG916901.1	China	Unknown	Unknown	Bat coronavirus	29102	Chiroptera			Bats	2012-05-19	Bat coronavirus isolate BtCoV/Rh/YN2012_Rs3376, complete genome		bat coronavirus isolate btcov/rh/yn2012_rs3376, complete genome	tan2023
MT984595.1	Romania	Gammacoronavirus	Igacovirus	Avian coronavirus	27457	Gallus gallus	Gallus	gallus	Birds	2011-01-01	Avian coronavirus strain D1783/2/3/2011/RO, complete genome		Gallus gallus	tan2023
KY674919.1	USA	Alphacoronavirus	Duvinacovirus	Human coronavirus 229E	27136	Homo sapiens	Homo	sapiens	Humans	2008-01-01	Human coronavirus 229E strain N08-434B, complete genome		Homo sapiens	tan2023
MZ293747.1	Bangladesh	Unknown	Unknown	Megaderma bat coronavirus	27276	Megaderma lyra	Megaderma	lyra	Bats	2013-05-23	Megaderma bat coronavirus isolate SBB-041, complete genome	rectal swab	Megaderma lyra	tan2023
KF514417.1	USA: Nashville, TN	Betacoronavirus	Sarbecovirus	Severe acute respiratory syndrome-related coronavirus	29687					2010-10-01	SARS coronavirus ExoN1 strain SARS/VeroE6_lab/USA/ExoN1_c5.3P20/2010, complete genome		sars coronavirus exon1 strain sars/veroe6_lab/usa/exon1_c5.3p20/2010, complete genome	tan2023
JX993988.1	China	Betacoronavirus	Sarbecovirus	Severe acute respiratory syndrome-related coronavirus	29452	Chaerephon plicatus	Chaerephon	plicatus	Felines	2011-01-01	Bat coronavirus Cp/Yunnan2011, complete genome		Chaerephon plicata	tan2023
MZ802774.1	Thailand	Deltacoronavirus	Buldecovirus	Coronavirus HKU15	25406	Sus scrofa	Sus	scrofa	Pigs	2016-09-01	Porcine deltacoronavirus strain PDCoV/CBR-3/2016/Thailand, complete genome	piglet small intestine	Sus scrofa	tan2023
AY994055.1	USA	Alphacoronavirus	Tegacovirus	Alphacoronavirus 1	29355	Felinae			Felines		Feline infectious peritonitis virus, complete genome		feline infectious peritonitis virus, complete genome	tan2023
OM174491.1	USA: New Jersey	Betacoronavirus	Sarbecovirus	Severe acute respiratory syndrome-related coronavirus	29654	Homo sapiens	Homo	sapiens	Humans	2021-12-16	Severe acute respiratory syndrome coronavirus 2 isolate SARS-CoV-2/human/USA/NJ-CDC-LC0443040/2021, complete genome	Nasal Swabs	Homo sapiens	tan2023
DQ415913.1	China: Hong Kong	Betacoronavirus	Embecovirus	Human coronavirus HKU1	29785	Homo	Homo		Humans		Human coronavirus HKU1 strain N17 genotype C, complete genome	nasopharyngeal aspirates of patients diagnosed respiratory tract infection diseases	human coronavirus hku1 strain n17 genotype c, complete genome	tan2023
KY674941.1	USA	Betacoronavirus	Embecovirus	Human coronavirus HKU1	29367	Homo sapiens	Homo	sapiens	Humans	2016-01-01	Human coronavirus HKU1 strain N09-1663B, complete genome		Homo sapiens	tan2023
KX432213.1	China	Betacoronavirus	Embecovirus	Betacoronavirus 1	30868	Canis	Canis		Canines	2014-01-01	Canine respiratory coronavirus strain BJ232, complete genome		dog	tan2023
MN173780.1	China	Deltacoronavirus	Buldecovirus	Coronavirus HKU15	25406	Sus	Sus		Pigs	2018-01-01	Porcine deltacoronavirus isolate CHN-GX12-2018, complete genome		porcine deltacoronavirus isolate chn-gx12-2018, complete genome	tan2023
KY967356.1	USA	Betacoronavirus	Embecovirus	Betacoronavirus 1	30648	Homo sapiens	Homo	sapiens	Humans	2015-01-01	Human coronavirus OC43 strain HCoV_OC43/Seattle/USA/SC2924/2015, complete genome		Homo sapiens	tan2023
HM245925.1	USA: Wisconsin	Alphacoronavirus	Minacovirus	Mink coronavirus 1	28941	Neogale vison	Neogale	vison	Mustelids	1998-01-01	Mink coronavirus strain WD1127, complete genome		Mustela vison	tan2023
LT898423.1		Alphacoronavirus	Pedacovirus	Porcine epidemic diarrhea virus	28030	Sus	Sus		Pigs		Porcine epidemic diarrhea virus isolate PEDV_GER_L01012-K01_15-02_2015 genome assembly, complete genome: monopartite		porcine epidemic diarrhea virus isolate pedv_ger_l01012-k01_15-02_2015 genome assembly, complete genome: monopartite	tan2023
MG197719.1	China	Betacoronavirus	Embecovirus	Betacoronavirus 1	30499	Homo	Homo		Humans	2015-06-04	Human coronavirus OC43 strain YC-67, complete genome	throat swabs or nasopharyngeal aspirates	human coronavirus oc43 strain yc-67, complete genome	tan2023
MF769425.1	China	Alphacoronavirus	Rhinacovirus	Swine acute diarrhea syndrome coronavirus	27173	Sus	Sus		Pigs	2017-01-01	Swine acute diarrhea syndrome coronavirus isolate 192, complete genome		swine	tan2023
MK957245.1	Brazil	Gammacoronavirus	Igacovirus	Avian coronavirus	27637	Gallus gallus	Gallus	gallus	Birds	1988-01-01	Infectious bronchitis virus strain PR01, complete genome	tracheas	Gallus gallus	tan2023
MZ007339.1	USA: North Carolina	Betacoronavirus	Sarbecovirus	Severe acute respiratory syndrome-related coronavirus	29811	Homo sapiens	Homo	sapiens	Humans	2021-04-01	Severe acute respiratory syndrome coronavirus 2 isolate SARS-CoV-2/human/USA/NC-CDC-STM-000048324/2021, complete genome	Nasal Swabs	Homo sapiens	tan2023
MH532440.1	Poland	Deltacoronavirus	Buldecovirus	Quail deltacoronavirus	25881	Coturnix japonica	Coturnix	japonica	Birds	2015-03-03	Quail deltacoronavirus strain G032/2015, complete genome		Coturnix japonica	tan2023
MN611525.1	China	Alphacoronavirus	Decacovirus	Alphacoronavirus CHB25	28169	Hipposideros larvatus	Hipposideros	larvatus	Bats	2018-03-01	Hipposideros pomona bat coronavirus CHB25 isolate CHB0025, complete genome		Hipposideros larvatus	tan2023
HQ392471.1	Netherlands: Utrecht	Alphacoronavirus	Tegacovirus	Alphacoronavirus 1	29252	Felinae			Felines	2007-08-23	Feline coronavirus UU20, complete genome		feline	tan2023
MF769426.1	China	Alphacoronavirus	Rhinacovirus	Swine acute diarrhea syndrome coronavirus	27173	Sus	Sus		Pigs	2017-01-01	Swine acute diarrhea syndrome coronavirus isolate 86, complete genome		swine	tan2023
MG197723.1	China	Betacoronavirus	Embecovirus	Betacoronavirus 1	30566	Homo	Homo		Humans	2016-06-20	Human coronavirus OC43 strain HZ-459, complete genome	throat swabs or nasopharyngeal aspirates	human coronavirus oc43 strain hz-459, complete genome	tan2023
JQ065049.1	China: Hong Kong	Deltacoronavirus	Buldecovirus	Common moorhen coronavirus HKU21	26223	Aves			Birds	2007-01-01	Common-moorhen coronavirus HKU21 strain HKU21-8295, complete genome		common moorhen	tan2023
EU420137.1	Hong Kong	Alphacoronavirus	Minunacovirus	Miniopterus bat coronavirus 1	28476	Chiroptera			Bats		Bat coronavirus 1B strain AFCD307, complete genome		bat coronavirus 1b strain afcd307, complete genome	tan2023
HQ012367.1	Netherlands: Utrecht	Alphacoronavirus	Tegacovirus	Alphacoronavirus 1	29202	Felinae			Felines	2007-07-17	Feline coronavirus UU17, complete genome		feline	tan2023
MN535737.1	Denmark: Holstebro	Alphacoronavirus	Minacovirus	Mink coronavirus 1	28914	Neogale vison	Neogale	vison	Mustelids	2015-07-01	Mink coronavirus 1 strain MCoV1/11918-1/DK/2015, complete genome	faeces	Neovison vison	tan2023
MZ081390.1	China	Alphacoronavirus	Unknown	Alphacoronavirus sp.	28479	Hipposideros pomona	Hipposideros	pomona	Bats	2019-11-07	Alphacoronavirus sp. strain bat/Yunnan/HpYN13/2019, complete genome	bat feces	Hipposideros pomona	tan2023
LC494130.1	Japan	Betacoronavirus	Embecovirus	Betacoronavirus 1	30954	Bovinae			Bovines	2010-12-01	Bovine coronavirus IWT-2 RNA, complete genome		bovine coronavirus iwt-2 rna, complete genome	tan2023
MT726044.1	Uganda	Unknown	Unknown	Bat coronavirus	29243	Rhinolophus	Rhinolophus		Bats	2013-05-30	Bat coronavirus isolate PREDICT/PDF-2370/OTBA35RSV, complete genome	feces	Rhinolophus sp. (bat)	tan2023
MF769431.1	China	Alphacoronavirus	Rhinacovirus	Swine acute diarrhea syndrome coronavirus	27173	Sus	Sus		Pigs	2017-01-01	Swine acute diarrhea syndrome coronavirus isolate 202, complete genome		swine	tan2023
DQ339101.1		Betacoronavirus	Embecovirus	Human coronavirus HKU1	29755	Homo	Homo		Humans		Human coronavirus HKU1 strain N5P8 genotype A/B recombinant, complete genome		human coronavirus hku1 strain n5p8 genotype a/b recombinant, complete genome	tan2023
NC_003045.1		Betacoronavirus	Embecovirus	Betacoronavirus 1	31028	Bovinae			Bovines		Bovine coronavirus isolate BCoV-ENT, complete genome		bovine coronavirus isolate bcov-ent, complete genome	tan2023
JX163927.1	USA	Betacoronavirus	Sarbecovirus	Severe acute respiratory syndrome-related coronavirus	29646					2010-02-05	SARS coronavirus Tor2 isolate Tor2/FP1-10851, complete genome		sars coronavirus tor2 isolate tor2/fp1-10851, complete genome	tan2023
MZ081389.1	China	Alphacoronavirus	Unknown	Alphacoronavirus sp.	28168	Hipposideros larvatus	Hipposideros	larvatus	Bats	2019-05-06	Alphacoronavirus sp. strain bat/Yunnan/HlYN10/2019, complete genome	bat feces	Hipposideros larvatus	tan2023
EF065516.1	China: Guangdong province	Betacoronavirus	Nobecovirus	Rousettus bat coronavirus HKU9	29155	Chiroptera			Bats		Bat coronavirus HKU9-4, complete genome		bat	tan2023
MK625640.1	China	Deltacoronavirus	Buldecovirus	Coronavirus HKU15	25447	Sus	Sus		Pigs	2018-10-01	Porcine deltacoronavirus isolate CH/JXJGS01/2016, complete genome		swine	tan2023
MN982198.1	China	Betacoronavirus	Embecovirus	Betacoronavirus 1	31018	Bovinae			Bovines	2018-11-01	Bovine coronavirus isolate BCOV-China/SWUN/A1/2018, complete genome	feces	calf	tan2023
JX163926.1	USA	Betacoronavirus	Sarbecovirus	Severe acute respiratory syndrome-related coronavirus	29646					2010-02-10	SARS coronavirus Tor2 isolate Tor2/FP1-10912, complete genome		sars coronavirus tor2 isolate tor2/fp1-10912, complete genome	tan2023
MH687941.1	Viet Nam	Alphacoronavirus	Unknown	Alphacoronavirus sp.	28008	Scotophilus kuhlii	Scotophilus	kuhlii	Bats	2014-06-17	Alphacoronavirus sp. strain VZ_AlphaCoV_16715_47_c1, complete genome		Scotophilus kuhlii	tan2023
LC494181.1	Japan	Betacoronavirus	Embecovirus	Betacoronavirus 1	30923	Bovinae			Bovines	2016-12-01	Bovine coronavirus TCG-22 RNA, complete genome		bovine coronavirus tcg-22 rna, complete genome	tan2023
LC494136.1	Japan	Betacoronavirus	Embecovirus	Betacoronavirus 1	30941	Bovinae			Bovines	2012-01-01	Bovine coronavirus IWT-8 RNA, complete genome		bovine coronavirus iwt-8 rna, complete genome	tan2023
FJ882952.1	USA: Tennessee	Betacoronavirus	Sarbecovirus	Severe acute respiratory syndrome-related coronavirus	29720					2008-11-25	SARS coronavirus MA15 isolate P3pp4, complete genome		sars coronavirus ma15 isolate p3pp4, complete genome	tan2023
KF923911.1	China: Beijing	Betacoronavirus	Embecovirus	Betacoronavirus 1	30713	Homo sapiens	Homo	sapiens	Humans	2007-06-01	Human coronavirus OC43 isolate 5479/2007, complete genome	nasal and throat swab	Homo sapiens	tan2023
MH687943.1	Viet Nam	Alphacoronavirus	Unknown	Alphacoronavirus sp.	28240	Scotophilus kuhlii	Scotophilus	kuhlii	Bats	2014-06-10	Alphacoronavirus sp. strain VZ_AlphaCoV_16715_5, complete genome		Scotophilus kuhlii	tan2023
JQ989266.1	Hong Kong	Alphacoronavirus	Decacovirus	Bat coronavirus HKU10	28483	Chiroptera			Bats	2006-12-01	Hipposideros bat coronavirus HKU10 isolate TT3A, complete genome		bat	tan2023
EU371559.1		Betacoronavirus	Sarbecovirus	Severe acute respiratory syndrome-related coronavirus	29731						SARS coronavirus ZJ02, complete genome		sars coronavirus zj02, complete genome	tan2023
AY851295.1		Gammacoronavirus	Igacovirus	Avian coronavirus	27475	Aves			Birds		Avian infectious bronchitis virus strain Mass 41, complete genome		avian infectious bronchitis virus strain mass 41, complete genome	tan2023
FJ588686.1	China	Betacoronavirus	Sarbecovirus	Severe acute respiratory syndrome-related coronavirus	29059	Rhinolophus sinicus	Rhinolophus	sinicus	Bats	2006-01-01	Bat SARS CoV Rs672/2006, complete genome		Rhinolophus sinicus	tan2023
MG428699.1	Kenya	Alphacoronavirus	Setracovirus	Human coronavirus NL63	27513	Homo sapiens	Homo	sapiens	Humans	2010-05-19	Human coronavirus NL63 isolate Kilifi_HH_5709_19-May-2010, complete genome		Homo sapiens	tan2023
KR265860.1	USA: Nebraska	Deltacoronavirus	Buldecovirus	Coronavirus HKU15	25396	Sus	Sus		Pigs	2014-02-05	Porcine deltacoronavirus strain USA/Nebraska209/2014, complete genome		pig	tan2023
FJ647225.1	USA: Pennsylvania	Betacoronavirus	Embecovirus	Murine coronavirus	31293	Mus musculus	Mus	musculus	Rodents		Murine coronavirus inf-MHV-A59, complete genome		Mus musculus	tan2023
JQ765573.1	USA: Denver, CO	Alphacoronavirus	Setracovirus	Human coronavirus NL63	27487	Homo sapiens	Homo	sapiens	Humans	2005-04-12	Human coronavirus NL63 strain NL63/DEN/2005/1062, complete genome	nasal pharyngeal wash from a 7.4 month old male	Homo sapiens; sex: M	tan2023
LC654453.1	Japan: Fukushima	Betacoronavirus	Embecovirus	Betacoronavirus 1	30713	Homo sapiens	Homo	sapiens	Humans	2018-01-01	Human coronavirus OC43 Fukushima_H189_2018 RNA, complete genome		Homo sapiens	tan2023
AY278489.2		Betacoronavirus	Sarbecovirus	Severe acute respiratory syndrome-related coronavirus	29757						SARS coronavirus GD01, complete genome		sars coronavirus gd01, complete genome	tan2023
LC494190.1	Japan	Betacoronavirus	Embecovirus	Betacoronavirus 1	30898	Bovinae			Bovines	2017-12-01	Bovine coronavirus TCG-31 RNA, complete genome		bovine coronavirus tcg-31 rna, complete genome	tan2023
KT779555.1	China	Betacoronavirus	Embecovirus	Human coronavirus HKU1	29887	Homo sapiens	Homo	sapiens	Humans	2009-04-23	Human coronavirus HKU1 isolate BJ01-p3, complete genome	nasopharyngeal swabs of pediatric patients diagnosed with severe acute respiratory tract infection	Homo sapiens	tan2023
LC494165.1	Japan	Betacoronavirus	Embecovirus	Betacoronavirus 1	30926	Bovinae			Bovines	2008-12-01	Bovine coronavirus TCG-10 RNA, complete genome		bovine coronavirus tcg-10 rna, complete genome	tan2023
AP006560.1		Betacoronavirus	Sarbecovirus	Severe acute respiratory syndrome-related coronavirus	29727						SARS coronavirus TWS genomic RNA, complete genome	primary sample from patient #04 with severe acute respiratory syndrome (SARS)	sars coronavirus tws genomic rna, complete genome	tan2023
JF292904.1	USA: Nashville, TN	Betacoronavirus	Sarbecovirus	Severe acute respiratory syndrome-related coronavirus	29645	Mus musculus	Mus	musculus	Rodents	2008-09-18	SARS coronavirus MA15 ExoN1 isolate d3om3, complete genome		Mus musculus; old	tan2023
LC494155.1	Japan	Betacoronavirus	Embecovirus	Betacoronavirus 1	30938	Bovinae			Bovines	2014-09-01	Bovine coronavirus SHG-2 RNA, complete genome		bovine coronavirus shg-2 rna, complete genome	tan2023
ON128610.1	China	Betacoronavirus	Embecovirus	Human coronavirus HKU1	29695	Homo sapiens	Homo	sapiens	Humans	2018-06-05	Human coronavirus HKU1 isolate GY18102, complete genome		Homo sapiens	tan2023
EU022526.1	USA: Indiana	Gammacoronavirus	Igacovirus	Avian coronavirus	27854	Meleagris	Meleagris		Birds		Turkey coronavirus isolate TCoV-ATCC, complete genome	turkey small intestine	turkey coronavirus isolate tcov-atcc, complete genome	tan2023
MN520206.1	China: Henan	Deltacoronavirus	Buldecovirus	Coronavirus HKU15	25419	Sus	Sus		Pigs	2019-03-01	UNVERIFIED: Porcine deltacoronavirus isolate HN2019-C132, complete genome		unverified: porcine deltacoronavirus isolate hn2019-c132, complete genome	tan2023
MH615810.1	China	Alphacoronavirus	Rhinacovirus	Swine acute diarrhea syndrome coronavirus	27184	Sus	Sus		Pigs	2018-03-01	Swine acute diarrhea syndrome coronavirus isolate SADS-CoV-CH-FJWT-2018, complete genome		swine	tan2023
AB691764.2	Japan: Miyagi, Sendai	Alphacoronavirus	Duvinacovirus	Human coronavirus 229E	27259	Homo sapiens	Homo	sapiens	Humans	2004-01-01	Human coronavirus 229E Sendai-H/1121/04 RNA, complete genome	pharyngeal swab using LLC-MK2 cells	Homo sapiens	tan2023
MK720945.1	Hong Kong	Alphacoronavirus	Decacovirus	Rhinolophus bat coronavirus HKU32	29201	Rhinolophus sinicus	Rhinolophus	sinicus	Bats	2015-08-06	Rhinolophus bat coronavirus HKU32 strain TLC26A, complete genome	anal swab	Rhinolophus sinicus	tan2023
KJ526096.1	China	Alphacoronavirus	Pedacovirus	Porcine epidemic diarrhea virus	28050	Sus	Sus		Pigs	2013-04-01	Porcine epidemic diarrhea virus isolate CH/JX-2/2013, complete genome		swine	tan2023
KF668605.1	China	Gammacoronavirus	Igacovirus	Avian coronavirus	27691	Gallus gallus	Gallus	gallus	Birds	2009-01-01	Infectious bronchitis virus isolate CK/CH/SD09/005, complete genome		Gallus gallus	tan2023
LC063830.1	Japan: Niigata	Alphacoronavirus	Pedacovirus	Porcine epidemic diarrhea virus	27904	Sus scrofa	Sus	scrofa	Pigs	2014-04-01	Porcine epidemic diarrhea virus genomic RNA, complete genome, strain: NIG-1/JPN/2014		Sus scrofa domesticus	tan2023
AY282752.2		Betacoronavirus	Sarbecovirus	Severe acute respiratory syndrome-related coronavirus	29736						SARS coronavirus CUHK-Su10, complete genome		sars coronavirus cuhk-su10, complete genome	tan2023
MG197717.1	China	Betacoronavirus	Embecovirus	Betacoronavirus 1	30524	Homo	Homo		Humans	2015-07-06	Human coronavirus OC43 strain WZ-522, complete genome	throat swabs or nasopharyngeal aspirates	human coronavirus oc43 strain wz-522, complete genome	tan2023
OK017853.1	China: Yunnan	Betacoronavirus	Sarbecovirus	Sarbecovirus sp.	29369	Rhinolophus sinicus	Rhinolophus	sinicus	Bats	2020-06-01	Sarbecovirus sp. isolate YN2020C, complete genome		Rhinolophus sinicus	tan2023
KM349744.1	China	Betacoronavirus	Embecovirus	China Rattus coronavirus HKU24	31249	Rattus norvegicus	Rattus	norvegicus	Rodents	2012-05-17	Betacoronavirus HKU24 strain HKU24-R05010I, complete genome		Rattus norvegicus (Norway rat)	tan2023
AY903460.1	Belgium	Betacoronavirus	Embecovirus	Betacoronavirus 1	30723	Homo	Homo		Humans		Human coronavirus OC43 strain 19572 Belgium 2004, complete genome		human coronavirus oc43 strain 19572 belgium 2004, complete genome	tan2023
LC488390.2	Japan:Tokyo	Alphacoronavirus	Setracovirus	Human coronavirus NL63	27550	Homo sapiens	Homo	sapiens	Humans	2017-01-01	Human coronavirus NL63 Tokyo/SGH-15/2017 RNA, complete genome	nasal swab	Homo sapiens	tan2023
MT294722.1	China	Alphacoronavirus	Rhinacovirus	Swine acute diarrhea syndrome coronavirus	27188	Sus	Sus		Pigs	2018-01-01	Swine acute diarrhea syndrome coronavirus isolate SADS-CoV-JX-CH/2018, complete genome		swine	tan2023
FJ938051.1	USA: California	Alphacoronavirus	Tegacovirus	Alphacoronavirus 1	29232	Felis	Felis		Felines	2002-01-28	Feline coronavirus RM, complete genome		cat	tan2023
MN514966.1	Nigeria	Betacoronavirus	Embecovirus	Betacoronavirus 1	31075	Camelus dromedarius	Camelus	dromedarius	Camelids	2015-11-12	Dromedary camel coronavirus HKU23 isolate DcCoV-HKU23/camel/Nigeria/NV1097/2015, complete genome		Camelus dromedarius	tan2023
FJ938055.1	Netherlands: Utrecht	Alphacoronavirus	Tegacovirus	Alphacoronavirus 1	29285	Felis	Felis		Felines	2007-05-24	Feline coronavirus UU8, complete genome		cat	tan2023
EU420138.1	Hong Kong	Alphacoronavirus	Minunacovirus	Miniopterus bat coronavirus 1	28326	Chiroptera			Bats		Miniopterus bat coronavirus 1, complete genome		miniopterus bat coronavirus 1, complete genome	tan2023
MN306018.1	USA	Alphacoronavirus	Setracovirus	Human coronavirus NL63	27484	Homo sapiens	Homo	sapiens	Humans	2018-01-01	Human coronavirus NL63 strain HCoV_NL63/Seattle/USA/SC0179/2018, complete genome		Homo sapiens	tan2023
DQ648794.1		Betacoronavirus	Merbecovirus	Tylonycteris bat coronavirus HKU4	30307	Chiroptera			Bats		Bat coronavirus (BtCoV/133/2005), complete genome		bat coronavirus (btcov/133/2005), complete genome	tan2023
NC_011550.1	Hong Kong	Deltacoronavirus	Buldecovirus	Munia coronavirus HKU13	26552	Aves			Birds	2007-04-01	Munia coronavirus HKU13-3514, complete genome		white-rumped munia	tan2023
LC260039.1	Japan: Gunma	Deltacoronavirus	Buldecovirus	Coronavirus HKU15	25362	Sus scrofa	Sus	scrofa	Pigs	2014-05-01	Porcine deltacoronavirus genomic RNA, complete genome, strain: GNM-1/JPN/2014		Sus scrofa domesticus	tan2023
OK017818.1	China: Guangdong	Betacoronavirus	Sarbecovirus	Sarbecovirus sp.	29550	Rhinolophus sinicus	Rhinolophus	sinicus	Bats	2017-09-01	Sarbecovirus sp. isolate GD2017L, complete genome		Rhinolophus sinicus	tan2023
MH938449.1	Italy	Alphacoronavirus	Nyctacovirus	Pipistrellus kuhlii coronavirus 3398	28128	Pipistrellus kuhlii	Pipistrellus	kuhlii	Bats	2015-01-01	Alphacoronavirus Bat-CoV/P.kuhlii/Italy/3398-19/2015, complete genome	feces	Pipistrellus kuhlii	tan2023
AY319651.1		Gammacoronavirus	Igacovirus	Avian coronavirus	27733	Aves			Birds		Avian infectious bronchitis virus isolate BJ, complete genome		avian infectious bronchitis virus isolate bj, complete genome	tan2023
KF696629.1	China	Gammacoronavirus	Igacovirus	Avian coronavirus	27630					2013-08-01	Infectious bronchitis virus strain Connecticut vaccine, complete genome		infectious bronchitis virus strain connecticut vaccine, complete genome	tan2023
FJ938056.1	Netherlands: Utrecht	Alphacoronavirus	Tegacovirus	Alphacoronavirus 1	29253	Felis	Felis		Felines	2007-03-07	Feline coronavirus UU5, complete genome		cat	tan2023
AY613949.1	China	Betacoronavirus	Sarbecovirus	Severe acute respiratory syndrome-related coronavirus	29730	palm civet			Civets		SARS coronavirus PC4-136, complete genome		palm civet	tan2023
OK017812.1	China: Guangdong	Betacoronavirus	Sarbecovirus	Sarbecovirus sp.	29515	Rhinolophus sinicus	Rhinolophus	sinicus	Bats	2016-07-01	Sarbecovirus sp. isolate GD2016B, complete genome		Rhinolophus sinicus	tan2023
AY559095.1	Singapore	Betacoronavirus	Sarbecovirus	Severe acute respiratory syndrome-related coronavirus	29719						SARS coronavirus Sin847, complete genome		sars coronavirus sin847, complete genome	tan2023
LC216914.1	Hong Kong	Deltacoronavirus	Buldecovirus	Coronavirus HKU15	25422	Sus scrofa	Sus	scrofa	Pigs	2014-02-13	Coronavirus HKU15 genomic RNA, complete genome, strain: S579N	nasopharynx	Sus scrofa domesticus	tan2023
KF430219.1	USA: Boulder County, CO	Alphacoronavirus	Colacovirus	Bat coronavirus CDPHE15	28035	Myotis lucifugus	Myotis	lucifugus	Bats	2006-08-07	Bat coronavirus CDPHE15/USA/2006, complete genome		Myotis lucifugus	tan2023
LC216915.1	Hong Kong	Deltacoronavirus	Buldecovirus	Coronavirus HKU15	25406	Sus scrofa	Sus	scrofa	Pigs	2014-02-13	Coronavirus HKU15 genomic RNA, complete genome, strain: S582N	nasopharynx	Sus scrofa domesticus	tan2023
MF094686.1	China	Unknown	Unknown	Swine acute diarrhea syndrome related coronavirus	27198	Rhinolophus	Rhinolophus		Bats		Swine acute diarrhea syndrome related coronavirus isolate 8495, complete genome		Rhinolophus sp.	tan2023
MH810163.1	China	Betacoronavirus	Embecovirus	Betacoronavirus 1	31032	Bos	Bos		Bovines	2017-01-01	Yak coronavirus strain YAK/HY24/CH/2017, complete genome		yak	tan2023
AY395000.1		Betacoronavirus	Sarbecovirus	Severe acute respiratory syndrome-related coronavirus	29350						SARS coronavirus LC3, complete genome		sars coronavirus lc3, complete genome	tan2023
KF923905.1	China: Beijing	Betacoronavirus	Embecovirus	Betacoronavirus 1	30722	Homo sapiens	Homo	sapiens	Humans	2005-06-01	Human coronavirus OC43 isolate 229/2005, complete genome	nasal and throat swab	Homo sapiens	tan2023
AY394999.1		Betacoronavirus	Sarbecovirus	Severe acute respiratory syndrome-related coronavirus	29350						SARS coronavirus LC2, complete genome		sars coronavirus lc2, complete genome	tan2023
KF514405.1	USA: Nashville, TN	Betacoronavirus	Sarbecovirus	Severe acute respiratory syndrome-related coronavirus	29687					2010-10-01	SARS coronavirus ExoN1 strain SARS/VeroE6_lab/USA/ExoN1_c5.2P20/2010, complete genome		sars coronavirus exon1 strain sars/veroe6_lab/usa/exon1_c5.2p20/2010, complete genome	tan2023
MF094685.1	China	Unknown	Unknown	Swine acute diarrhea syndrome related coronavirus	27200	Rhinolophus	Rhinolophus		Bats		Swine acute diarrhea syndrome related coronavirus isolate 8462, complete genome		Rhinolophus sp.	tan2023
FJ882947.1	USA: Tennessee	Betacoronavirus	Sarbecovirus	Severe acute respiratory syndrome-related coronavirus	29616					2008-03-28	SARS coronavirus wtic-MB isolate P3pp7, complete genome		sars coronavirus wtic-mb isolate p3pp7, complete genome	tan2023
KF530075.1	USA: Nashville, TN	Betacoronavirus	Embecovirus	Betacoronavirus 1	30577	Homo sapiens	Homo	sapiens	Humans	1995-03-09	Human coronavirus OC43 strain OC43/human/USA/953-23/1995, complete genome		Homo sapiens; sex: F; age: 12Y	tan2023
AY502926.1	Taiwan	Betacoronavirus	Sarbecovirus	Severe acute respiratory syndrome-related coronavirus	29729						SARS coronavirus TW3, complete genome		sars coronavirus tw3, complete genome	tan2023
MH687973.1	Viet Nam	Betacoronavirus	Unknown	Betacoronavirus sp.	31323	Rattus argentiventer	Rattus	argentiventer	Rodents	2014-11-12	Betacoronavirus sp. strain VZ_BetaCoV_20724_39, complete genome		Rattus argentiventer	tan2023
JQ765565.1	USA: Denver, CO	Alphacoronavirus	Setracovirus	Human coronavirus NL63	27469	Homo sapiens	Homo	sapiens	Humans	2009-02-13	Human coronavirus NL63 strain NL63/DEN/2009/15, complete genome	nasal pharyngeal wash from a 22 month old male	Homo sapiens; sex: M	tan2023
KC175341.1	USA: Ithaca, NY	Alphacoronavirus	Tegacovirus	Alphacoronavirus 1	29340	Canis lupus	Canis	lupus	Canines	1978-01-01	Canine coronavirus strain S378, complete genome		Canis lupus familiaris	tan2023
MZ802773.1	Thailand	Deltacoronavirus	Buldecovirus	Coronavirus HKU15	25406	Sus scrofa	Sus	scrofa	Pigs	2016-09-01	Porcine deltacoronavirus strain PDCoV/CBR-2/2016/Thailand, complete genome	piglet small intestine	Sus scrofa	tan2023
KJ584355.1	USA: Ohio	Deltacoronavirus	Buldecovirus	Coronavirus HKU15	25422	Sus	Sus		Pigs	2014-02-12	Porcine coronavirus HKU15 strain IL2768, complete genome		pig	tan2023
LC494138.1	Japan	Betacoronavirus	Embecovirus	Betacoronavirus 1	30954	Bovinae			Bovines	2015-05-01	Bovine coronavirus IWT-12 RNA, complete genome		bovine coronavirus iwt-12 rna, complete genome	tan2023
KJ473814.1	China	Betacoronavirus	Sarbecovirus	Severe acute respiratory syndrome-related coronavirus	29658	Rhinolophus sinicus	Rhinolophus	sinicus	Bats	2013-01-01	BtRs-BetaCoV/HuB2013, complete genome		Rhinolophus sinicus	tan2023
KT021234.1	China	Deltacoronavirus	Buldecovirus	Coronavirus HKU15	25419	Sus	Sus		Pigs	2015-03-20	Porcine deltacoronavirus strain CH/SXD1/2015, complete genome		porcine	tan2023
MH539766.1	China	Alphacoronavirus	Rhinacovirus	Rhinolophus bat coronavirus HKU2	27170	Sus scrofa	Sus	scrofa	Pigs	2017-07-01	Porcine enteric alphacoronavirus isolate CHN-GD-2017, complete genome		Sus scrofa	tan2023
KJ425495.1	China	Gammacoronavirus	Igacovirus	Avian coronavirus	27642	Gallus gallus	Gallus	gallus	Birds	2012-10-26	Infectious bronchitis virus strain ck/CH/LHB/121040, complete genome		Gallus gallus	tan2023
AP006558.1		Betacoronavirus	Sarbecovirus	Severe acute respiratory syndrome-related coronavirus	29725						SARS coronavirus TWJ genomic RNA, complete genome	primary sample from patient #43 with severe acute respiratory syndrome (SARS)	sars coronavirus twj genomic rna, complete genome	tan2023
JX163923.1	USA	Betacoronavirus	Sarbecovirus	Severe acute respiratory syndrome-related coronavirus	29646					2010-02-10	SARS coronavirus Tor2 isolate Tor2/FP1-10912, complete genome		sars coronavirus tor2 isolate tor2/fp1-10912, complete genome	tan2023
AY502930.1	Taiwan	Betacoronavirus	Sarbecovirus	Severe acute respiratory syndrome-related coronavirus	29729						SARS coronavirus TW7, complete genome		sars coronavirus tw7, complete genome	tan2023
KF650370.1	USA	Alphacoronavirus	Pedacovirus	Porcine epidemic diarrhea virus	28038	Sus	Sus		Pigs	2013-05-16	Porcine epidemic diarrhea virus isolate ISU13-19338E-IN-homogenate, complete genome		pig	tan2023
MZ328301.1	China	Alphacoronavirus	Unknown	Longquan Berylmys bowersi alphacoronavirus 1	28660	Berylmys bowersi	Berylmys	bowersi	Rodents	2016-01-01	Longquan Berylmys bowersi alphacoronavirus 1, complete genome		Berylmys bowersi	tan2023
MG197709.1	China	Betacoronavirus	Embecovirus	Betacoronavirus 1	30550	Homo	Homo		Humans	2015-04-22	Human coronavirus OC43 strain BJ-112, complete genome	throat swabs or nasopharyngeal aspirates	human coronavirus oc43 strain bj-112, complete genome	tan2023
KY369912.1	USA	Alphacoronavirus	Duvinacovirus	Human coronavirus 229E	27208	Homo sapiens	Homo	sapiens	Humans	2016-01-01	Human coronavirus 229E strain HCoV_229E/Seattle/USA/SC9731/2016, complete genome		Homo sapiens	tan2023
KT368912.1	Saudi Arabia	Alphacoronavirus	Duvinacovirus	Human coronavirus 229E	27395	Camelus	Camelus		Camelids	2015-01-01	Camel alphacoronavirus isolate camel/Jeddah/Jd28/2015, complete genome		camel	tan2023
MG738155.1	Malaysia	Gammacoronavirus	Igacovirus	Avian coronavirus	27660	Gallus gallus	Gallus	gallus	Birds	2015-01-01	Infectious bronchitis virus isolate IBS130/2015, complete genome		Gallus gallus (chicken)	tan2023
MG605090.1	China	Alphacoronavirus	Rhinacovirus	Swine acute diarrhea syndrome coronavirus	27163	Sus	Sus		Pigs	2017-02-26	Swine acute diarrhea syndrome coronavirus isolate SADS-CoV/CN/GDGL/2017, complete genome		swine	tan2023
MW532698.1		Betacoronavirus	Sarbecovirus	Pangolin coronavirus	29729	Pholidota			Pangolins		Pangolin coronavirus isolate GX_P2V, complete genome		pangolin	tan2023
MN514963.1	Morocco	Betacoronavirus	Embecovirus	Betacoronavirus 1	31062	Camelus dromedarius	Camelus	dromedarius	Camelids	2016-03-05	Dromedary camel coronavirus HKU23 isolate DcCoV-HKU23/camel/Morocco/CAC2586/2016, complete genome		Camelus dromedarius	tan2023
MT438698.1	USA: Little Rock, Arkansas	Alphacoronavirus	Duvinacovirus	Human coronavirus 229E	27297	Homo sapiens	Homo	sapiens	Humans	2017-02-24	Human coronavirus 229E isolate HCoV-229E/USA/ACRI_0256/2017, complete genome	nasopharyngeal swab	Homo sapiens	tan2023
AY362699.1		Betacoronavirus	Sarbecovirus	Severe acute respiratory syndrome-related coronavirus	29727						SARS coronavirus TWC3, complete genome		sars coronavirus twc3, complete genome	tan2023
DQ084199.1		Betacoronavirus	Sarbecovirus	Severe acute respiratory syndrome-related coronavirus	29687	Chiroptera			Bats		bat SARS coronavirus HKU3-2, complete genome		bat sars coronavirus hku3-2, complete genome	tan2023
KX442565.1	China	Betacoronavirus	Merbecovirus	Hypsugo bat coronavirus HKU25	30497	Hypsugo pulveratus	Hypsugo	pulveratus	Bats	2014-05-08	Hypsugo bat coronavirus HKU25 isolate NL140462, complete genome	anal swab	Hypsugo pulveratus	tan2023
MF769444.1	China	Alphacoronavirus	Rhinacovirus	Swine acute diarrhea syndrome coronavirus	27173	Sus	Sus		Pigs	2017-01-01	Swine acute diarrhea syndrome coronavirus isolate DCD7, complete genome		swine	tan2023
MW086531.1	Jordan	Betacoronavirus	Merbecovirus	Middle East respiratory syndrome-related coronavirus	29786	Camelus dromedarius	Camelus	dromedarius	Camelids	2016-05-01	Middle East respiratory syndrome-related coronavirus isolate MERS-CoV/JC26/Ramtha, complete genome		Camelus dromedarius	tan2023
MZ420153.1	Haiti	Alphacoronavirus	Tegacovirus	Alphacoronavirus 1	29377	Homo sapiens	Homo	sapiens	Humans	2017-03-15	Canine coronavirus isolate Z19, complete genome	urine	Homo sapiens	tan2023
OK318941.1	China	Betacoronavirus	Embecovirus	Betacoronavirus 1	30646	Homo sapiens	Homo	sapiens	Humans	2018-11-29	Human coronavirus OC43 strain OC43/China/22/2019, complete genome	nasopharyngeal_swab	Homo sapiens	tan2023
KF514402.1	USA: Nashville, TN	Betacoronavirus	Sarbecovirus	Severe acute respiratory syndrome-related coronavirus	29687					2010-10-01	SARS coronavirus ExoN1 strain SARS/VeroE6_lab/USA/ExoN1_c5.6P20/2010, complete genome		sars coronavirus exon1 strain sars/veroe6_lab/usa/exon1_c5.6p20/2010, complete genome	tan2023
AY394995.1		Betacoronavirus	Sarbecovirus	Severe acute respiratory syndrome-related coronavirus	29765						SARS coronavirus HSZ-Cc, complete genome		sars coronavirus hsz-cc, complete genome	tan2023
KX834351.1	Viet Nam	Deltacoronavirus	Buldecovirus	Coronavirus HKU15	25406	Suidae			unknown	2015-10-10	Porcine deltacoronavirus strain PDCoV/Swine/Vietnam/HaNoi6/2015, complete genome	feces	piglet	tan2023
MN879331.1	China	Unknown	Unknown	Erinaceus amurensis coronavirus	30089	Erinaceus amurensis	Erinaceus	amurensis	Hedgehogs	2017-04-24	UNVERIFIED: Erinaceus amurensis coronavirus isolate cw_6, complete genome	intestine	Erinaceus amurensis	tan2023
MF508703.1	China	Gammacoronavirus	Igacovirus	Avian coronavirus	27590	Aves			Birds	2013-01-01	Infectious bronchitis virus isolate YX10 D90 vaccine, complete genome		chicken	tan2023
OL934036.1	USA: Michigan	Betacoronavirus	Sarbecovirus	Severe acute respiratory syndrome-related coronavirus	29890	Homo sapiens	Homo	sapiens	Humans	2021-12-08	Severe acute respiratory syndrome coronavirus 2 isolate SARS-CoV-2/human/USA/MI-CDC-STM-M395N3EKA/2021, complete genome	nasal swab	Homo sapiens	tan2023
KX512810.1	USA: Michigan	Alphacoronavirus	Minacovirus	Ferret coronavirus	27987	Mustela putorius	Mustela	putorius	Mustelids	2015-01-01	Ferret systemic coronavirus strain FSCV6, complete genome		ferret	tan2023
OK017815.1	China: Guangdong	Betacoronavirus	Sarbecovirus	Sarbecovirus sp.	29550	Rhinolophus sinicus	Rhinolophus	sinicus	Bats	2017-09-01	Sarbecovirus sp. isolate GD2017I, complete genome		Rhinolophus sinicus	tan2023
MG197712.1	China	Betacoronavirus	Embecovirus	Betacoronavirus 1	30497	Homo	Homo		Humans	2015-06-09	Human coronavirus OC43 strain BJ-165, complete genome	throat swabs or nasopharyngeal aspirates	human coronavirus oc43 strain bj-165, complete genome	tan2023
MF431743.1	China	Deltacoronavirus	Buldecovirus	Coronavirus HKU15	25414	Sus	Sus		Pigs	2014-01-01	Porcine deltacoronavirus strain SD, complete genome	feces	pig	tan2023
OD908462.1	United Kingdom:England	Betacoronavirus	Sarbecovirus	Severe acute respiratory syndrome-related coronavirus	29903	Homo sapiens	Homo	sapiens	Humans	2020-11-18	Severe acute respiratory syndrome coronavirus 2 genome assembly, complete genome: monopartite		Homo sapiens	tan2023
MK071267.1		Gammacoronavirus	Igacovirus	Avian coronavirus	27632	Aves			Birds		Avian coronavirus AvCoV/Gallus gallus//H120 complete genome		avian coronavirus avcov/gallus gallus//h120 complete genome	tan2023
LC494167.1	Japan	Betacoronavirus	Embecovirus	Betacoronavirus 1	30942	Bovinae			Bovines	2008-12-01	Bovine coronavirus TCG-12 RNA, complete genome		bovine coronavirus tcg-12 rna, complete genome	tan2023
KF530079.1	USA: Nashville, TN	Betacoronavirus	Embecovirus	Betacoronavirus 1	30581	Homo sapiens	Homo	sapiens	Humans	1991-03-14	Human coronavirus OC43 strain OC43/human/USA/913-29/1991, complete genome		Homo sapiens; sex: M; age: 9Y	tan2023
KY513724.1	China: Hunan	Deltacoronavirus	Buldecovirus	Coronavirus HKU15	25413	Sus	Sus		Pigs	2014-01-01	Porcine deltacoronavirus strain CH/Hunan/2014, complete genome	fecal sample	pig	tan2023
OL674078.1	China: Yunnan, Puer	Betacoronavirus	Sarbecovirus	Severe acute respiratory syndrome-related coronavirus	29816	Rhinolophus stheno	Rhinolophus	stheno	Bats	2015-05-29	Severe acute respiratory syndrome-related coronavirus isolate Rs7921, complete genome	anal swab	Rhinolophus stheno	tan2023
FJ425189.1	USA: Ohio	Betacoronavirus	Embecovirus	Betacoronavirus 1	30997	Cervidae			Deers	1994-01-01	Sambar deer coronavirus US/OH-WD388/1994, complete genome		sambar deer	tan2023
LC494129.1	Japan	Betacoronavirus	Embecovirus	Betacoronavirus 1	30934	Bovinae			Bovines	2010-10-01	Bovine coronavirus IWT-1 RNA, complete genome		bovine coronavirus iwt-1 rna, complete genome	tan2023
MK211373.1	China	Alphacoronavirus	Unknown	Coronavirus BtRs-AlphaCoV/YN2018	29109	Cynopterus sphinx	Cynopterus	sphinx	Bats	2017-05-01	Coronavirus BtRs-AlphaCoV/YN2018, complete genome		Cynopterus sphinx	tan2023
HQ890542.1	USA: Nashville, TN	Betacoronavirus	Sarbecovirus	Severe acute respiratory syndrome-related coronavirus	29646	Mus musculus	Mus	musculus	Rodents	2008-09-17	SARS coronavirus MA15 isolate d2om1, complete genome		Mus musculus; old	tan2023
KT368907.1	Saudi Arabia	Alphacoronavirus	Duvinacovirus	Human coronavirus 229E	27395	Camelus	Camelus		Camelids	2015-03-01	Camel alphacoronavirus isolate camel/Riyadh/Ry141/2015, complete genome		camel	tan2023
MZ293732.1	Cambodia	Unknown	Unknown	Macroglossus bat coronavirus	30136	Macroglossus sobrinus	Macroglossus	sobrinus	Bats	2013-11-28	Macroglossus bat coronavirus isolate PREDICT/GCS-003, complete genome	rectal swab	Macroglossus sobrinus	tan2023
OK017832.1	China: Hunan	Betacoronavirus	Sarbecovirus	Sarbecovirus sp.	29517	Rhinolophus sinicus	Rhinolophus	sinicus	Bats	2021-02-01	Sarbecovirus sp. isolate HN2021C, complete genome		Rhinolophus sinicus	tan2023
MN535733.1	Denmark: Moensted	Unknown	Unknown	Bat coronavirus	28192	Myotis daubentonii	Myotis	daubentonii	Bats	2018-10-01	MAG: Bat coronavirus isolate BtCoV/OV-157/M.dau/DK/2018, complete genome	feces	Myotis daubentonii	tan2023
DQ497008.1		Betacoronavirus	Sarbecovirus	Severe acute respiratory syndrome-related coronavirus	29727						SARS coronavirus strain MA-15, complete genome		sars coronavirus strain ma-15, complete genome	tan2023
KY417152.1	China	Betacoronavirus	Sarbecovirus	Severe acute respiratory syndrome-related coronavirus	29769	Rhinolophus sinicus	Rhinolophus	sinicus	Bats	2015-10-16	Bat SARS-like coronavirus isolate Rs9401, complete genome		Rhinolophus sinicus	tan2023
OK017836.1	China: Jiangxi	Betacoronavirus	Sarbecovirus	Sarbecovirus sp.	29535	Rhinolophus sinicus	Rhinolophus	sinicus	Bats	2021-07-01	Sarbecovirus sp. isolate JX2021AC, complete genome		Rhinolophus sinicus	tan2023
KF530071.1	USA: Nashville, TN	Betacoronavirus	Embecovirus	Betacoronavirus 1	30578	Homo sapiens	Homo	sapiens	Humans	1992-05-04	Human coronavirus OC43 strain OC43/human/USA/925-1/1992, complete genome		Homo sapiens; sex: M; age: 34Y	tan2023
LC488389.2	Japan:Tokyo	Alphacoronavirus	Setracovirus	Human coronavirus NL63	27487	Homo sapiens	Homo	sapiens	Humans	2018-01-01	Human coronavirus NL63 Tokyo/SGH-18/2018 RNA, complete genome	nasal swab	Homo sapiens	tan2023
KJ425485.1	China	Gammacoronavirus	Igacovirus	Avian coronavirus	27594	Gallus gallus	Gallus	gallus	Birds	2011-09-17	Infectious bronchitis virus strain ck/CH/LDL/110931, complete genome		Gallus gallus	tan2023
KT199103.1	China	Alphacoronavirus	Pedacovirus	Porcine epidemic diarrhea virus	28038	Suidae			unknown	2015-06-01	Porcine epidemic diarrhea virus isolate CH/HNLH/2015, complete genome	feces	piglet	tan2023
KT368827.1	Saudi Arabia	Betacoronavirus	Merbecovirus	Middle East respiratory syndrome-related coronavirus	30114	Camelus	Camelus		Camelids	2014-09-01	Middle East respiratory syndrome coronavirus isolate camel/Jeddah/401/2014, complete genome		camel	tan2023
NC_011549.1	Hong Kong	Deltacoronavirus	Buldecovirus	Thrush coronavirus HKU12-600	26396	Aves			Birds	2007-01-01	Thrush coronavirus HKU12-600, complete genome		grey-backed thrush	tan2023
MK937829.1	China	Gammacoronavirus	Igacovirus	Avian coronavirus	27639	Gallus	Gallus		Birds	2017-01-01	Infectious bronchitis virus strain I0306/17, complete genome		Gallus	tan2023
MW620427.1	Brazil: Campinas-SP	Betacoronavirus	Embecovirus	Murine coronavirus	31218	Mus musculus	Mus	musculus	Rodents	2020-01-01	Murine coronavirus MHV-3 isolate UNICAMP, complete genome		Mus musculus	tan2023
LC494177.1	Japan	Betacoronavirus	Embecovirus	Betacoronavirus 1	30936	Bovinae			Bovines	2008-03-01	Bovine coronavirus TCG-9 RNA, complete genome		bovine coronavirus tcg-9 rna, complete genome	tan2023
MH687964.1	Viet Nam	Alphacoronavirus	Unknown	Alphacoronavirus sp.	28210	Scotophilus kuhlii	Scotophilus	kuhlii	Bats	2015-02-06	Alphacoronavirus sp. strain VZ_AlphaCoV_20745_10, complete genome		Scotophilus kuhlii	tan2023
MZ293742.1	Malaysia	Unknown	Unknown	Hipposideros bat coronavirus	28190	Hipposideros diadema	Hipposideros	diadema	Bats	2013-08-22	Hipposideros bat coronavirus isolate PREDICT-CoV-52/PDF-1704, complete genome	rectal swab	Hipposideros diadema	tan2023
KT253327.1	Saudi Arabia	Alphacoronavirus	Duvinacovirus	Human coronavirus 229E	27241	Camelus dromedarius	Camelus	dromedarius	Camelids	2014-01-01	Camel alphacoronavirus Camel229E isolate Camel229E-CoV/AC04/KSA/2014, complete genome	cell culture supernatant	Camelus dromedarius	tan2023
MT806758.1	USA: CA	Betacoronavirus	Sarbecovirus	Severe acute respiratory syndrome-related coronavirus	29782	Homo sapiens	Homo	sapiens	Humans	2020-04-10	Severe acute respiratory syndrome coronavirus 2 isolate SARS-CoV-2/human/USA/CA-QDX-221/2020, complete genome	patient specimen	Homo sapiens	tan2023
ON128615.1	China	Betacoronavirus	Embecovirus	Human coronavirus HKU1	29886	Homo sapiens	Homo	sapiens	Humans	2018-12-11	Human coronavirus HKU1 isolate GZFE18183, complete genome		Homo sapiens	tan2023
DQ022305.2	China	Betacoronavirus	Sarbecovirus	Severe acute respiratory syndrome-related coronavirus	29728	Chiroptera			Bats		Bat SARS coronavirus HKU3-1, complete genome		bat sars coronavirus hku3-1, complete genome	tan2023
MT747188.1	China	Alphacoronavirus	Rhinacovirus	Swine acute diarrhea syndrome coronavirus	27163	Sus	Sus		Pigs	2017-02-01	Swine acute diarrhea syndrome coronavirus isolate SADS-CoV/CN/GDST/2017, complete genome	small intestine	swine	tan2023
FJ938057.1	Netherlands: Utrecht	Alphacoronavirus	Tegacovirus	Alphacoronavirus 1	29275	Felis	Felis		Felines	2007-07-13	Feline coronavirus UU15, complete genome		cat	tan2023
MT039232.1		Alphacoronavirus	Rhinacovirus	Swine acute diarrhea syndrome coronavirus	27271	Sus	Sus		Pigs		Mutant Swine acute diarrhea syndrome coronavirus strain icSADS-tRFP, complete genome		pig	tan2023
KJ473815.1	China	Betacoronavirus	Sarbecovirus	Severe acute respiratory syndrome-related coronavirus	29161	Rhinolophus sinicus	Rhinolophus	sinicus	Bats	2013-01-01	BtRs-BetaCoV/GX2013, complete genome		Rhinolophus sinicus	tan2023
MG605091.1	China	Alphacoronavirus	Rhinacovirus	Swine acute diarrhea syndrome coronavirus	27163	Sus	Sus		Pigs	2016-08-09	Swine acute diarrhea syndrome coronavirus isolate SADS-CoV/CN/GDLS/2017, complete genome		swine	tan2023
LC494170.1	Japan	Betacoronavirus	Embecovirus	Betacoronavirus 1	30938	Bovinae			Bovines	2010-01-01	Bovine coronavirus TCG-15 RNA, complete genome		bovine coronavirus tcg-15 rna, complete genome	tan2023
KF530105.1	USA: Nashville, TN	Alphacoronavirus	Setracovirus	Human coronavirus NL63	27413	Homo sapiens	Homo	sapiens	Humans	2001-02-23	Human coronavirus NL63 strain NL63/human/USA/012-31/2001, complete genome		Homo sapiens; sex: F; age: 13Y	tan2023
KY073747.1	Kenya	Alphacoronavirus	Duvinacovirus	Human coronavirus 229E	27837	Hipposideros	Hipposideros		Bats	2009-06-20	229E-related bat coronavirus strain BtKY229E-1, complete genome	fecal swab	Hipposideros sp.	tan2023
LC494144.1	Japan	Betacoronavirus	Embecovirus	Betacoronavirus 1	30954	Bovinae			Bovines	2016-12-01	Bovine coronavirus IWT-20 RNA, complete genome		bovine coronavirus iwt-20 rna, complete genome	tan2023
MT199592.1	China	Alphacoronavirus	Rhinacovirus	Swine acute diarrhea syndrome coronavirus	27178	Sus	Sus		Pigs	2018-09-09	Swine acute diarrhea syndrome coronavirus isolate SADS-CoV/GDZJ02/2018, complete genome		swine	tan2023
NC_018871.1	China	Alphacoronavirus	Decacovirus	Bat coronavirus HKU10	28494	Chiroptera			Bats	2005-10-01	Rousettus bat coronavirus HKU10, complete genome		bat	tan2023
KF923889.1	China: Beijing	Betacoronavirus	Embecovirus	Betacoronavirus 1	30719	Homo sapiens	Homo	sapiens	Humans	2006-03-01	Human coronavirus OC43 isolate 1926/2006, complete genome	nasal and throat swab	Homo sapiens	tan2023
MW896952.1	China: Yunnan	Unknown	Unknown	Yunnan coronavirus 3	27687					2018-04-01	MAG: Yunnan coronavirus 3 isolate R22-452490, complete genome	Chicken faeces	mag: yunnan coronavirus 3 isolate r22-452490, complete genome	tan2023
LC315648.2	Japan: Tokyo	Betacoronavirus	Embecovirus	Betacoronavirus 1	30714	Homo sapiens	Homo	sapiens	Humans	2015-01-01	Human coronavirus OC43 Tokyo/SGH-06/2015 RNA, complete genome	nasal swab using HBTE-ALI cells	Homo sapiens	tan2023
NC_023760.1	USA: Wisconsin	Alphacoronavirus	Minacovirus	Mink coronavirus 1	28941	Neogale vison	Neogale	vison	Mustelids	1998-01-01	Mink coronavirus strain WD1127, complete genome		Mustela vison	tan2023
KF294380.2	China	Alphacoronavirus	Luchacovirus	Lucheng Rn rat coronavirus	28763	Rattus norvegicus	Rattus	norvegicus	Rodents	2013-01-01	Lucheng Rn rat coronavirus isolate Lucheng-19, complete genome		Rattus norvegicus	tan2023
KY073745.1	Kenya	Alphacoronavirus	Setracovirus	NL63-related bat coronavirus strain BtKYNL63-9b	28679	Triaenops afer	Triaenops	afer	Bats	2010-06-21	NL63-related bat coronavirus strain BtKYNL63-9b, complete genome	fecal swab	Triaenops afer	tan2023
KR610993.1	Thailand	Alphacoronavirus	Pedacovirus	Porcine epidemic diarrhea virus	27409	Sus	Sus		Pigs	2014-07-15	Porcine epidemic diarrhea virus clone CBR1, complete genome	small intestine	swine	tan2023
MN262644.1	Egypt	Gammacoronavirus	Igacovirus	Avian coronavirus	27523	Aves			Birds	2018-01-01	Avian coronavirus strain CV10, complete genome	tracheal swabs	chicken	tan2023
EU074218.2	China	Alphacoronavirus	Tegacovirus	Alphacoronavirus 1	28569	Sus	Sus		Pigs		Transmissible gastroenteritis virus strain attenuated H, complete genome		transmissible gastroenteritis virus strain attenuated h, complete genome	tan2023
JX104161.1	China: Beijing Children's Hospital, Beijing	Alphacoronavirus	Setracovirus	Human coronavirus NL63	27538	Homo sapiens	Homo	sapiens	Humans	2008-11-04	Human coronavirus NL63 isolate CBJ 037, complete genome	1 year 6 mos old child suffering from fever, cough, rhinorrhea and asthmatic bronchitis	Homo sapiens	tan2023
MF593473.1	United Arab Emirates	Alphacoronavirus	Duvinacovirus	Human coronavirus 229E	27389	Camelus	Camelus		Camelids	2015-01-01	Camel alphacoronavirus Abu Dhabi B38, complete genome	nasopharyngeal swab	camel	tan2023
MH726397.1	China	Alphacoronavirus	Pedacovirus	Porcine epidemic diarrhea virus	28038	Sus scrofa	Sus	scrofa	Pigs	2012-10-20	Porcine epidemic diarrhea virus isolate GDS38, complete genome	small intestine	Sus scrofa	tan2023
OM937885.1	China	Betacoronavirus	Embecovirus	Betacoronavirus 1	30964	Equus	Equus		Equines	2020-01-01	Equine coronavirus strain ECoV 2020/7881, complete genome		donkey	tan2023
HQ890546.1	USA: Nashville, TN	Betacoronavirus	Sarbecovirus	Severe acute respiratory syndrome-related coronavirus	29646	Mus musculus	Mus	musculus	Rodents	2008-09-17	SARS coronavirus MA15 isolate d2om5, complete genome		Mus musculus; old	tan2023
JN874562.1	China	Betacoronavirus	Embecovirus	Rabbit coronavirus HKU14	30904	Oryctolagus cuniculus	Oryctolagus	cuniculus	Lagomorphs	2007-01-01	Rabbit coronavirus HKU14 strain HKU14-10, complete genome		Oryctolagus cuniculus	tan2023
LC494171.1	Japan	Betacoronavirus	Embecovirus	Betacoronavirus 1	30936	Bovinae			Bovines	2010-01-01	Bovine coronavirus TCG-16 RNA, complete genome		bovine coronavirus tcg-16 rna, complete genome	tan2023
GQ153539.1		Betacoronavirus	Sarbecovirus	Severe acute respiratory syndrome-related coronavirus	29704	Chiroptera			Bats		Bat SARS coronavirus HKU3-4, complete genome		bat sars coronavirus hku3-4, complete genome	tan2023
KY293677.1	China	Deltacoronavirus	Buldecovirus	Coronavirus HKU15	25438	Suidae			unknown	2016-05-23	Porcine deltacoronavirus isolate CH/JXJGS01/2016, complete genome		piglet	tan2023
JQ765569.1	USA: Denver, CO	Alphacoronavirus	Setracovirus	Human coronavirus NL63	27469	Homo sapiens	Homo	sapiens	Humans	2005-01-18	Human coronavirus NL63 strain NL63/DEN/2005/232, complete genome	nasal pharyngeal wash from an 18 year old male	Homo sapiens; sex: M	tan2023
JF292917.1	USA: Nashville, TN	Betacoronavirus	Sarbecovirus	Severe acute respiratory syndrome-related coronavirus	29646	Mus musculus	Mus	musculus	Rodents	2008-09-19	SARS coronavirus MA15 isolate d3om2, complete genome		Mus musculus; old	tan2023
MF094684.1	China	Alphacoronavirus	Rhinacovirus	Swine acute diarrhea syndrome coronavirus	27173	Sus	Sus		Pigs		Swine acute diarrhea syndrome coronavirus isolate FarmD, complete genome		swine	tan2023
JQ408980.1		Alphacoronavirus	Tegacovirus	Alphacoronavirus 1	29363	Felis catus	Felis	catus	Felines		Feline coronavirus strain DF-2 R3i, complete genome		Felis catus	tan2023
MH726382.1	China	Alphacoronavirus	Pedacovirus	Porcine epidemic diarrhea virus	28038	Sus scrofa	Sus	scrofa	Pigs	2016-05-18	Porcine epidemic diarrhea virus isolate GDS47, complete genome	small intestine	Sus scrofa	tan2023
AF208067.1		Betacoronavirus	Embecovirus	Murine coronavirus	31233	Murinae			Rodents		Murine hepatitis virus strain ML-10, complete genome		murine hepatitis virus strain ml-10, complete genome	tan2023
OM907487.2	USA	Betacoronavirus	Sarbecovirus	Severe acute respiratory syndrome-related coronavirus	29785	Homo sapiens	Homo	sapiens	Humans	2022-01-31	Severe acute respiratory syndrome coronavirus 2 isolate SARS-CoV-2/human/USA/UT-UPHL-220218595053/2022 ORF1ab polyprotein (ORF1ab), ORF1a polyprotein (ORF1ab), surface glycoprotein (S), ORF3a protein (ORF3a), envelope protein (E), membrane glycoprotein (M), ORF6 protein (ORF6), ORF7a protein (ORF7a), ORF7b (ORF7b), ORF8 protein (ORF8), nucleocapsid phosphoprotein (N), and ORF10 protein (ORF10) ge…		Homo sapiens	tan2023
OK017856.1	China: Yunnan	Betacoronavirus	Sarbecovirus	Sarbecovirus sp.	29134	Rhinolophus sinicus	Rhinolophus	sinicus	Bats	2020-06-01	Sarbecovirus sp. isolate YN2020F, complete genome		Rhinolophus sinicus	tan2023
KJ462462.1	USA: Ohio	Deltacoronavirus	Buldecovirus	Coronavirus HKU15	25422	Sus	Sus		Pigs	2014-01-31	Porcine coronavirus HKU15 strain OH1987, complete genome		pig	tan2023
KF514423.1	USA: Nashville, TN	Betacoronavirus	Sarbecovirus	Severe acute respiratory syndrome-related coronavirus	29687					2009-07-08	SARS coronavirus wtic-MB strain SARS/VeroE6_lab/USA/WTic_c3P20/2009, complete genome		sars coronavirus wtic-mb strain sars/veroe6_lab/usa/wtic_c3p20/2009, complete genome	tan2023
AF220295.1		Betacoronavirus	Embecovirus	Betacoronavirus 1	31100	Bovinae			Bovines		Bovine coronavirus strain Quebec, complete genome		bovine coronavirus strain quebec, complete genome	tan2023
OK017830.1	China: Guizhou	Betacoronavirus	Sarbecovirus	Sarbecovirus sp.	29329	Rhinolophus sinicus	Rhinolophus	sinicus	Bats	2021-03-01	Sarbecovirus sp. isolate GZ2021H, complete genome		Rhinolophus sinicus	tan2023
OK017860.1	China: Jiangxi	Betacoronavirus	Sarbecovirus	Sarbecovirus sp.	29541	Rhinolophus siamensis	Rhinolophus	siamensis	Bats	2021-07-01	Sarbecovirus sp. isolate JX2021D, complete genome		Rhinolophus siamensis	tan2023
MW246801.1	Italy	Betacoronavirus	Unknown	Betacoronavirus Erinaceus	30791	Erinaceus europaeus	Erinaceus	europaeus	Hedgehogs	2019-01-01	Betacoronavirus Erinaceus isolate ErinaceusCoV/Italy/50265-13/2019, complete genome	feces	Erinaceus europaeus	tan2023
MH726405.1	China	Alphacoronavirus	Pedacovirus	Porcine epidemic diarrhea virus	28038	Sus scrofa	Sus	scrofa	Pigs	2016-12-06	Porcine epidemic diarrhea virus isolate GDS48, complete genome	small intestine	Sus scrofa	tan2023
MZ293735.1	Republic of the Congo	Unknown	Unknown	Hipposideros bat coronavirus	27979	Hipposideros caffer	Hipposideros	caffer	Bats	2012-07-30	Hipposideros bat coronavirus isolate PREDICT/GCS-017, complete genome	rectal swab	Hipposideros caffer	tan2023
KF530073.1	USA: Nashville, TN	Betacoronavirus	Embecovirus	Betacoronavirus 1	30577	Homo sapiens	Homo	sapiens	Humans	1989-12-21	Human coronavirus OC43 strain OC43/human/USA/8912-37/1989, complete genome		Homo sapiens; sex: M; age: 9Y	tan2023
KX574227.1	Uganda	Unknown	Unknown	Bat coronavirus	29642	Pipistrellus hesperidus	Pipistrellus	hesperidus	Bats	2013-02-20	Bat coronavirus isolate PREDICT/PDF-2180, complete genome	rectal swab	Pipistrellus cf. hesperidus; specimen voucher: OTBA03-20130220	tan2023
MF094682.1	China	Alphacoronavirus	Rhinacovirus	Swine acute diarrhea syndrome coronavirus	27173	Sus	Sus		Pigs		Swine acute diarrhea syndrome coronavirus isolate FarmB, complete genome		swine	tan2023
KX722531.1	Denmark	Alphacoronavirus	Tegacovirus	Alphacoronavirus 1	29042	Felis catus	Felis	catus	Felines	2015-02-01	Feline coronavirus isolate Cat 2 Holstebro, complete genome	omentum	Felis catus	tan2023
KF923902.1	China: Beijing	Betacoronavirus	Embecovirus	Betacoronavirus 1	30713	Homo sapiens	Homo	sapiens	Humans	2012-05-01	Human coronavirus OC43 isolate 12689/2012, complete genome	nasal and throat swab	Homo sapiens	tan2023
OL674074.1	China: Yunnan, Puer	Betacoronavirus	Sarbecovirus	Severe acute respiratory syndrome-related coronavirus	29385	Rhinolophus stheno	Rhinolophus	stheno	Bats	2015-05-29	Severe acute respiratory syndrome-related coronavirus isolate Rs7896, complete genome	anal swab	Rhinolophus stheno	tan2023
KP202848.1	China	Alphacoronavirus	Tegacovirus	Alphacoronavirus 1	28611	Sus scrofa	Sus	scrofa	Pigs	2013-03-07	Transmissible gastroenteritis virus isolate SHXB, complete genome		Sus scrofa	tan2023
KY293678.1	China	Deltacoronavirus	Buldecovirus	Coronavirus HKU15	25438	Suidae			unknown	2016-05-23	Porcine deltacoronavirus isolate CH/JXJGS02/2016, complete genome		piglet	tan2023
OK017793.1	China: Yunnan	Betacoronavirus	Sarbecovirus	Sarbecovirus sp.	29310	Rhinolophus affinis	Rhinolophus	affinis	Bats	2020-09-01	Sarbecovirus sp. isolate YN2020A, complete genome		Rhinolophus affinis	tan2023
FJ647220.1	USA: Pennsylvania	Betacoronavirus	Embecovirus	Murine coronavirus	31429	Mus musculus	Mus	musculus	Rodents		Murine coronavirus RA59/SJHM, complete genome		Mus musculus	tan2023
KT368843.1	Saudi Arabia	Betacoronavirus	Merbecovirus	Middle East respiratory syndrome-related coronavirus	30118	Camelus	Camelus		Camelids	2014-12-01	Middle East respiratory syndrome coronavirus isolate camel/Jeddah/D88/2014, complete genome		camel	tan2023
FJ882935.1	USA: Tennessee	Betacoronavirus	Sarbecovirus	Severe acute respiratory syndrome-related coronavirus	29647					2008-03-28	SARS coronavirus wtic-MB isolate P3pp21, complete genome		sars coronavirus wtic-mb isolate p3pp21, complete genome	tan2023
KF530109.1	USA: Nashville, TN	Alphacoronavirus	Setracovirus	Human coronavirus NL63	27410	Homo sapiens	Homo	sapiens	Humans	1990-03-21	Human coronavirus NL63 strain NL63/human/USA/903-28/1990, complete genome		Homo sapiens; sex: M; age: 5Y	tan2023
JQ989268.1	Hong Kong	Alphacoronavirus	Decacovirus	Bat coronavirus HKU10	28483	Chiroptera			Bats	2006-10-01	Hipposideros bat coronavirus HKU10 isolate TLC1310A, complete genome		bat	tan2023
MH687946.1	Viet Nam	Alphacoronavirus	Unknown	Alphacoronavirus sp.	28173	Scotophilus kuhlii	Scotophilus	kuhlii	Bats	2014-06-10	Alphacoronavirus sp. strain VZ_AlphaCoV_16715_61, complete genome		Scotophilus kuhlii	tan2023
MZ325487.1	Poland	Alphacoronavirus	Pedacovirus	Porcine epidemic diarrhea virus	28021	Sus	Sus		Pigs	2016-12-27	Porcine epidemic diarrhea virus isolate 44176/1, complete genome		pig	tan2023
KU182965.1	China	Unknown	Unknown	Bat coronavirus	30321	Myotis daubentonii	Myotis	daubentonii	Bats	2012-12-01	Bat coronavirus isolate JPDB144, complete genome	intestines	Myotis daubentonii	tan2023
NC_002306.3	USA	Alphacoronavirus	Tegacovirus	Alphacoronavirus 1	29355	Felinae			Felines		Feline infectious peritonitis virus, complete genome		feline infectious peritonitis virus, complete genome	tan2023
MK211169.1	China	Deltacoronavirus	Buldecovirus	Coronavirus HKU15	25393	Sus	Sus		Pigs	2017-12-24	Porcine deltacoronavirus strain CHN/Sichuan/2017, complete genome	small intestine	porcine	tan2023
KT336560.1	China	Deltacoronavirus	Buldecovirus	Coronavirus HKU15	25420	Sus scrofa	Sus	scrofa	Pigs	2014-11-24	Porcine deltacoronavirus isolate CHN-HN-2014, complete genome		Sus scrofa	tan2023
MN520195.1	China: Shandong	Deltacoronavirus	Buldecovirus	Coronavirus HKU15	25404	Sus	Sus		Pigs	2018-03-01	UNVERIFIED: Porcine deltacoronavirus isolate SD2018-304, complete genome		unverified: porcine deltacoronavirus isolate sd2018-304, complete genome	tan2023
KT779556.1	China	Betacoronavirus	Embecovirus	Human coronavirus HKU1	29887	Homo sapiens	Homo	sapiens	Humans	2009-04-23	Human coronavirus HKU1 isolate BJ01-p9, complete genome	nasopharyngeal swabs of pediatric patients diagnosed with severe acute respiratory tract infection	Homo sapiens	tan2023
KT368893.1	Saudi Arabia	Alphacoronavirus	Duvinacovirus	Human coronavirus 229E	27386	Camelus	Camelus		Camelids	2014-06-01	Camel alphacoronavirus isolate camel/Jeddah/Jd55/2014, complete genome		camel	tan2023
FJ425188.1	USA: Ohio	Betacoronavirus	Embecovirus	Betacoronavirus 1	30995	Cervidae			Deers	1994-01-01	Sambar deer coronavirus US/OH-WD388-TC/1994, complete genome		sambar deer	tan2023
MF094687.1	China	Unknown	Unknown	Swine acute diarrhea syndrome related coronavirus	27174	Rhinolophus	Rhinolophus		Bats		Swine acute diarrhea syndrome related coronavirus isolate 141388, complete genome		Rhinolophus sp.	tan2023
KT253324.1	Saudi Arabia	Alphacoronavirus	Duvinacovirus	Human coronavirus 229E	27395	Camelus dromedarius	Camelus	dromedarius	Camelids	2014-01-01	Camel alphacoronavirus Camel229E isolate Camel229E-CoV/JC50/KSA/2014, complete genome	nasal swab	Camelus dromedarius	tan2023
NC_032730.1	China	Alphacoronavirus	Luchacovirus	Lucheng Rn rat coronavirus	28763	Rattus norvegicus	Rattus	norvegicus	Rodents	2013-01-01	Lucheng Rn rat coronavirus isolate Lucheng-19, complete genome		Rattus norvegicus	tan2023
KR265855.1	USA: Minnesota	Deltacoronavirus	Buldecovirus	Coronavirus HKU15	25394	Sus	Sus		Pigs	2014-05-21	Porcine deltacoronavirus strain USA/Minnesota455/2014, complete genome		pig	tan2023
KF530072.1	USA: Nashville, TN	Betacoronavirus	Embecovirus	Betacoronavirus 1	30577	Homo sapiens	Homo	sapiens	Humans	1997-12-11	Human coronavirus OC43 strain OC43/human/USA/9712-13/1997, complete genome		Homo sapiens; sex: M; age: 19Y	tan2023
KT121575.1	Saudi Arabia	Betacoronavirus	Merbecovirus	Middle East respiratory syndrome-related coronavirus	29896	Homo sapiens	Homo	sapiens	Humans	2014-05-12	Middle East respiratory syndrome coronavirus isolate KFMC-4, complete genome		Homo sapiens	tan2023
AY559092.1	Singapore	Betacoronavirus	Sarbecovirus	Severe acute respiratory syndrome-related coronavirus	29713						SARS coronavirus SinP5, complete genome		sars coronavirus sinp5, complete genome	tan2023
NC_030292.1	Netherlands	Alphacoronavirus	Minacovirus	Ferret coronavirus	28434	Mustela putorius	Mustela	putorius	Mustelids	2010-01-01	Ferret coronavirus isolate FRCoV-NL-2010, complete genome		Mustela putorius (ferret)	tan2023
MZ293753.1	Bangladesh	Betacoronavirus	Nobecovirus	Rousettus bat coronavirus GCCDC1	29095	Rousettus leschenaultii	Rousettus	leschenaultii	Bats	2008-09-05	Rousettus bat coronavirus isolate SBB-747, complete genome	mixed feces and urine	Rousettus leschenaultii	tan2023
MH002341.1	China	Betacoronavirus	Merbecovirus	Pipistrellus bat coronavirus HKU5	30480	Pipistrellus pipistrellus	Pipistrellus	pipistrellus	Bats	2014-06-28	Pipistrellus bat coronavirus HKU5 isolate BY140562, complete genome		Pipistrellus pipistrellus	tan2023
HM776941.1	China	Alphacoronavirus	Tegacovirus	Alphacoronavirus 1	28580	Sus	Sus		Pigs	2009-01-01	UNVERIFIED: Transmissible gastroenteritis virus isolate AYU, complete genome	intestine	swine	tan2023
OK391226.1	China	Betacoronavirus	Embecovirus	Betacoronavirus 1	30686	Homo sapiens	Homo	sapiens	Humans	2019-05-04	Human coronavirus OC43 strain OC43/China/36/2019, complete genome	nasopharyngeal swab	Homo sapiens	tan2023
OX089007.1	United Kingdom:England	Betacoronavirus	Sarbecovirus	Severe acute respiratory syndrome-related coronavirus	29873	Homo sapiens	Homo	sapiens	Humans	2022-01-06	Severe acute respiratory syndrome coronavirus 2 genome assembly, complete genome: monopartite		Homo sapiens	tan2023
MW532105.1	China	Alphacoronavirus	Duvinacovirus	Human coronavirus 229E	27237	Homo sapiens	Homo	sapiens	Humans	2017-09-06	Human coronavirus 229E strain 229E/China/05/2017, complete genome	nasopharyngeal swab	Homo sapiens	tan2023
AY278491.2		Betacoronavirus	Sarbecovirus	Severe acute respiratory syndrome-related coronavirus	29742						SARS coronavirus HKU-39849, complete genome		sars coronavirus hku-39849, complete genome	tan2023
KY417151.1	China	Betacoronavirus	Sarbecovirus	Severe acute respiratory syndrome-related coronavirus	30307	Rhinolophus sinicus	Rhinolophus	sinicus	Bats	2014-10-24	Bat SARS-like coronavirus isolate Rs7327, complete genome		Rhinolophus sinicus	tan2023
MT984598.1	Portugal	Gammacoronavirus	Igacovirus	Avian coronavirus	27659	Gallus gallus	Gallus	gallus	Birds	2012-01-01	Avian coronavirus strain D2002/2/2012/PT, complete genome		Gallus gallus	tan2023
LC494162.1	Japan	Betacoronavirus	Embecovirus	Betacoronavirus 1	30936	Bovinae			Bovines	2006-12-01	Bovine coronavirus TCG-3 RNA, complete genome		bovine coronavirus tcg-3 rna, complete genome	tan2023
FJ938066.1	USA: Ohio	Betacoronavirus	Embecovirus	Betacoronavirus 1	30953	Bovinae			Bovines	1996-01-01	Bovine respiratory coronavirus bovine/US/OH-440-TC/1996, complete genome		bovine	tan2023
LC494191.1	Japan	Betacoronavirus	Embecovirus	Betacoronavirus 1	30942	Bovinae			Bovines	2017-12-01	Bovine coronavirus TCG-32 RNA, complete genome		bovine coronavirus tcg-32 rna, complete genome	tan2023
KT253325.1	Saudi Arabia	Alphacoronavirus	Duvinacovirus	Human coronavirus 229E	27193	Camelus dromedarius	Camelus	dromedarius	Camelids	2014-01-01	Camel alphacoronavirus Camel229E isolate Camel229E-CoV/JC49/KSA/2014, complete genome	cell culture supernatant	Camelus dromedarius	tan2023
MH708125.1	China	Deltacoronavirus	Buldecovirus	Coronavirus HKU15	25453	Sus	Sus		Pigs	2018-03-20	Porcine deltacoronavirus strain HNZK-06, complete genome		pig	tan2023
MN655012.1	Saudi Arabia	Betacoronavirus	Merbecovirus	Middle East respiratory syndrome-related coronavirus	30001	Camelus dromedarius	Camelus	dromedarius	Camelids	2017-05-01	Middle East respiratory syndrome-related coronavirus isolate Al-Hasa-SA2685/2017, complete genome	nasopharyngeal swab	Camelus dromedarius	tan2023
GQ427175.1	USA	Gammacoronavirus	Igacovirus	Avian coronavirus	27690	Aves			Birds	1994-01-01	Turkey coronavirus strain TCoV/IN-517/94, complete genome		turkey	tan2023
ON587591.1	USA: Florida	Betacoronavirus	Sarbecovirus	Severe acute respiratory syndrome-related coronavirus	29693	Homo sapiens	Homo	sapiens	Humans	2022-05-05	Severe acute respiratory syndrome coronavirus 2 isolate SARS-CoV-2/human/USA/FL-CDC-LC0622858/2022, complete genome	Nasal Swabs	Homo sapiens	tan2023
KF923921.1	China: Beijing	Betacoronavirus	Embecovirus	Betacoronavirus 1	30713	Homo sapiens	Homo	sapiens	Humans	2007-05-01	Human coronavirus OC43 isolate 69A/2007, complete genome	nasopharyngeal aspirate	Homo sapiens	tan2023
OK500297.1	China	Betacoronavirus	Embecovirus	Betacoronavirus 1	30708	Homo sapiens	Homo	sapiens	Humans	2019-10-25	Human coronavirus OC43 strain OC43/China/53/2019, complete genome	nasopharyngeal_swab	Homo sapiens	tan2023
MZ368698.1	Brazil	Gammacoronavirus	Igacovirus	Avian coronavirus	27602	Gallus gallus	Gallus	gallus	Birds	2020-07-17	Avian coronavirus strain Beaudette, complete genome		Gallus gallus	tan2023
MZ562881.1	Switzerland	Unknown	Unknown	Equine coronavirus CH21	30965	Equus caballus	Equus	caballus	Equines	2021-01-01	Equine coronavirus CH21 isolate Haribo, complete genome		Equus caballus	tan2023
FJ882941.1	USA: Tennessee	Betacoronavirus	Sarbecovirus	Severe acute respiratory syndrome-related coronavirus	29665					2008-03-28	SARS coronavirus ExoN1 isolate P3pp8, complete genome		sars coronavirus exon1 isolate p3pp8, complete genome	tan2023
JF292909.1	USA: Nashville, TN	Betacoronavirus	Sarbecovirus	Severe acute respiratory syndrome-related coronavirus	29646	Mus musculus	Mus	musculus	Rodents	2008-08-10	SARS coronavirus MA15 isolate d2ym4, complete genome		Mus musculus; young	tan2023
MG428704.1	Kenya	Alphacoronavirus	Setracovirus	Human coronavirus NL63	27832	Homo sapiens	Homo	sapiens	Humans	2010-05-20	Human coronavirus NL63 isolate Kilifi_HH_5402_20-May-2010, complete genome		Homo sapiens	tan2023
MN611519.1	China	Betacoronavirus	Merbecovirus	Tylonycteris pachypus bat coronavirus HKU4-related	30224	Tylonycteris pachypus	Tylonycteris	pachypus	Bats	2018-03-01	Tylonycteris pachypus bat coronavirus HKU4-related isolate GZ131656, complete genome		Tylonycteris pachypus	tan2023
OK318947.1	China	Betacoronavirus	Embecovirus	Betacoronavirus 1	30679	Homo sapiens	Homo	sapiens	Humans	2019-10-22	Human coronavirus OC43 strain OC43/China/51/2019, complete genome	nasopharyngeal_swab	Homo sapiens	tan2023
KF793826.1		Gammacoronavirus	Cegacovirus	Beluga whale coronavirus SW1	31775	Tursiops	Tursiops		Cetaceans		Bottlenose dolphin coronavirus HKU22 isolate CF090331, complete genome		bottlenose dolphin coronavirus hku22 isolate cf090331, complete genome	tan2023
MK211370.1	China	Alphacoronavirus	Pedacovirus	Coronavirus BtSk-AlphaCoV/GX2018B	28175	Scotophilus kuhlii	Scotophilus	kuhlii	Bats	2017-05-01	Coronavirus BtSk-AlphaCoV/GX2018B, complete genome		Scotophilus kuhlii	tan2023
OK391223.1	China	Betacoronavirus	Embecovirus	Betacoronavirus 1	29818	Homo sapiens	Homo	sapiens	Humans	2019-01-23	UNVERIFIED: Human coronavirus OC43 strain OC43/China/29/2019, complete genome	nasopharyngeal swab	Homo sapiens	tan2023
MT387202.1	South Korea	Betacoronavirus	Merbecovirus	Middle East respiratory syndrome-related coronavirus	30108	Homo sapiens	Homo	sapiens	Humans	2015-05-20	Middle East respiratory syndrome-related coronavirus isolate KNIH_002, complete genome		Homo sapiens	tan2023
MK359255.1	Canada	Gammacoronavirus	Unknown	Canada goose coronavirus	28539	Branta canadensis	Branta	canadensis	Birds	2017-08-01	Canada goose coronavirus strain Cambridge_Bay_2017, complete genome	cloacal swab	Branta canadensis	tan2023
KX348116.1	China	Gammacoronavirus	Igacovirus	Avian coronavirus	27688	Gallus gallus	Gallus	gallus	Birds	2014-05-01	Infectious bronchitis virus strain ck/CH/LBJ/140514, complete genome		Gallus gallus	tan2023
FJ647224.1	USA: Pennsylvania	Betacoronavirus	Embecovirus	Murine coronavirus	31448	Mus musculus	Mus	musculus	Rodents		Murine coronavirus MHV-3, complete genome		Mus musculus	tan2023
MN306053.1	USA	Betacoronavirus	Embecovirus	Betacoronavirus 1	30818	Homo sapiens	Homo	sapiens	Humans	2019-01-01	Human coronavirus OC43 strain HCoV_OC43/Seattle/USA/SC9430/2018, complete genome		Homo sapiens	tan2023
MN719179.1	China	Alphacoronavirus	Unknown	Raccoon dog acute diarrhea syndrome coronavirus	29342	Canis	Canis		Canines	2018-01-01	Raccoon dog acute diarrhea syndrome coronavirus strain HBCL, complete genome	intestine from raccoon dog with diarrhea	raccoon dog	tan2023
MG011357.2	Saudi Arabia	Betacoronavirus	Merbecovirus	Middle East respiratory syndrome-related coronavirus	30096	Homo sapiens	Homo	sapiens	Humans	2016-09-21	Middle East respiratory syndrome-related coronavirus isolate Hu/Riyadh-KSA-24244/2016, complete genome	respiratory secretions	Homo sapiens	tan2023
OL415262.1	USA: South Dakota	Alphacoronavirus	Unknown	Eptesicus bat coronavirus	28546	Eptesicus fuscus	Eptesicus	fuscus	Bats	2021-07-21	Eptesicus bat coronavirus strain 15593, complete genome		Eptesicus fuscus	tan2023
MN781985.1	China	Deltacoronavirus	Buldecovirus	Coronavirus HKU15	25420	Sus scrofa	Sus	scrofa	Pigs		Porcine deltacoronavirus isolate CHzmd2019, complete genome		Sus scrofa	tan2023
LC364345.1	United Arab Emirates	Deltacoronavirus	Buldecovirus	Quail coronavirus UAE-HKU30	25874	Galliformes			Birds	2013-06-23	Quail coronavirus UAE-HKU30 411F genomic RNA, complete genome		Galliformes sp. (Quail)	tan2023
KM392226.1	USA	Alphacoronavirus	Pedacovirus	Porcine epidemic diarrhea virus	28038	Sus	Sus		Pigs	2013-11-01	Porcine epidemic diarrhea virus strain TC PC168-P2, complete genome		pig	tan2023
OK318944.1	China	Betacoronavirus	Embecovirus	Betacoronavirus 1	30689	Homo sapiens	Homo	sapiens	Humans	2019-03-12	Human coronavirus OC43 strain OC43/China/34/2019, complete genome	nasopharyngeal_swab	Homo sapiens	tan2023
KF569996.1	China	Betacoronavirus	Sarbecovirus	Severe acute respiratory syndrome-related coronavirus	29805	Rhinolophus affinis	Rhinolophus	affinis	Bats	2011-01-01	Rhinolophus affinis coronavirus isolate LYRa11, complete genome	alimentary	Rhinolophus affinis	tan2023
OK067319.1	Madagascar: Ambakoana	Betacoronavirus	Nobecovirus	Pteropus rufus nobecovirus	29122	Pteropus rufus	Pteropus	rufus	Bats	2018-02-26	Pteropus rufus nobecovirus isolate AMB130, complete genome	feces	Pteropus rufus	tan2023
LC654452.1	Japan: Fukushima	Betacoronavirus	Embecovirus	Betacoronavirus 1	30743	Homo sapiens	Homo	sapiens	Humans	2018-01-01	Human coronavirus OC43 Fukushima_H478_2018 RNA, complete genome		Homo sapiens	tan2023
AY278490.3		Betacoronavirus	Sarbecovirus	Severe acute respiratory syndrome-related coronavirus	29740						SARS coronavirus BJ03, complete genome		sars coronavirus bj03, complete genome	tan2023
MW532114.1	China	Betacoronavirus	Embecovirus	Betacoronavirus 1	30695	Homo sapiens	Homo	sapiens	Humans	2017-08-12	Human coronavirus OC43 strain OC43/China/08/2017, complete genome	nasopharyngeal swab	Homo sapiens	tan2023
KX900393.1	USA	Alphacoronavirus	Tegacovirus	Alphacoronavirus 1	28582	Sus	Sus		Pigs	2006-12-08	Transmissible gastroenteritis virus strain TGEV/USA/Z/1986, complete genome	intestine	transmissible gastroenteritis virus strain tgev/usa/z/1986, complete genome	tan2023
MG893511.1	Germany	Alphacoronavirus	Tegacovirus	Alphacoronavirus 1	29298	Felis catus	Felis	catus	Felines	2012-07-01	Feline coronavirus isolate Felix, complete genome		Felis catus	tan2023
MN369046.1	USA	Alphacoronavirus	Duvinacovirus	Human coronavirus 229E	27075	Homo sapiens	Homo	sapiens	Humans	2018-01-01	Human coronavirus 229E strain HCoV_229E/Seattle/USA/SC9724/2018, complete genome		Homo sapiens	tan2023
MW030108.1	China	Alphacoronavirus	Tegacovirus	Alphacoronavirus 1	29234	Felis catus	Felis	catus	Felines	2018-05-01	Feline coronavirus isolate QS, complete genome		Felis catus	tan2023
FJ882959.1	USA: Tennessee	Betacoronavirus	Sarbecovirus	Severe acute respiratory syndrome-related coronavirus	29721					2008-11-26	SARS coronavirus MA15 ExoN1 isolate P3pp6, complete genome		sars coronavirus ma15 exon1 isolate p3pp6, complete genome	tan2023
AY345988.1		Betacoronavirus	Sarbecovirus	Severe acute respiratory syndrome-related coronavirus	29736						SARS coronavirus CUHK-AG03, complete genome	patient 3 of the Amoy Gardens cohort	sars coronavirus cuhk-ag03, complete genome	tan2023
AY394986.1		Betacoronavirus	Sarbecovirus	Severe acute respiratory syndrome-related coronavirus	29729						SARS coronavirus HSZ-Cb, complete genome		sars coronavirus hsz-cb, complete genome	tan2023
EF424622.1	USA:Ohio	Betacoronavirus	Embecovirus	Betacoronavirus 1	30979	Giraffa	Giraffa		Giraffids		Giraffe coronavirus US/OH3-TC/2006, complete genome		giraffe	tan2023
LC494133.1	Japan	Betacoronavirus	Embecovirus	Betacoronavirus 1	30954	Bovinae			Bovines	2011-11-01	Bovine coronavirus IWT-5 RNA, complete genome		bovine coronavirus iwt-5 rna, complete genome	tan2023
EF065512.1	China: Guangdong province	Betacoronavirus	Merbecovirus	Pipistrellus bat coronavirus HKU5	30487	Chiroptera			Bats		Bat coronavirus HKU5-5, complete genome		bat	tan2023
LC494149.1	Japan	Betacoronavirus	Embecovirus	Betacoronavirus 1	30944	Bovinae			Bovines	2016-12-01	Bovine coronavirus IWT-23 RNA, complete genome		bovine coronavirus iwt-23 rna, complete genome	tan2023
MF113046.1	China	Alphacoronavirus	Minacovirus	Alphacoronavirus Mink/China/1/2016	28924	Neogale vison	Neogale	vison	Mustelids	2016-01-01	Alphacoronavirus Mink/China/1/2016, complete genome		mink	tan2023
ON611198.1	USA: Arizona	Betacoronavirus	Sarbecovirus	Severe acute respiratory syndrome-related coronavirus	29835	Homo sapiens	Homo	sapiens	Humans	2022-05-11	Severe acute respiratory syndrome coronavirus 2 isolate SARS-CoV-2/human/USA/AZ-CDC-STM-5RR7RXBD8/2022, complete genome	nasal swab	Homo sapiens	tan2023
OL929336.1	USA: Pennsylvania	Betacoronavirus	Sarbecovirus	Severe acute respiratory syndrome-related coronavirus	29811	Homo sapiens	Homo	sapiens	Humans	2021-11-17	Severe acute respiratory syndrome coronavirus 2 isolate SARS-CoV-2/human/USA/PA-CDC-ASC210426523/2021, complete genome	Nasal - Anterior Nares	Homo sapiens	tan2023
MZ081393.1	China	Alphacoronavirus	Unknown	Alphacoronavirus sp.	28682	Rhinolophus malayanus	Rhinolophus	malayanus	Bats	2020-05-25	Alphacoronavirus sp. strain bat/Yunnan/RmYN17/2020, complete genome	bat feces	Rhinolophus malayanus	tan2023
MF598608.1	United Arab Emirates	Betacoronavirus	Merbecovirus	Middle East respiratory syndrome-related coronavirus	30123	Camelus dromedarius	Camelus	dromedarius	Camelids	2015-03-01	Middle East respiratory syndrome-related coronavirus strain camel/UAE_B16_2015, complete genome	nasopharyngeal swab	Camelus dromedarius	tan2023
KT368903.1	Saudi Arabia	Alphacoronavirus	Duvinacovirus	Human coronavirus 229E	27384	Camelus	Camelus		Camelids	2014-12-01	Camel alphacoronavirus isolate camel/Jeddah/D38(a)/2014, complete genome		camel	tan2023
OL962072.1	USA: New Jersey	Betacoronavirus	Sarbecovirus	Severe acute respiratory syndrome-related coronavirus	29769	Homo sapiens	Homo	sapiens	Humans	2021-12-04	Severe acute respiratory syndrome coronavirus 2 isolate SARS-CoV-2/human/USA/NJ-CDC-QDX31729836/2021, complete genome	Nasal Swabs	Homo sapiens	tan2023
NC_034440.1	Uganda	Unknown	Unknown	Bat coronavirus	29642	Pipistrellus hesperidus	Pipistrellus	hesperidus	Bats	2013-02-20	Bat coronavirus isolate PREDICT/PDF-2180, complete genome	rectal swab	Pipistrellus hesperidus	tan2023
LC494188.1	Japan	Betacoronavirus	Embecovirus	Betacoronavirus 1	30942	Bovinae			Bovines	2017-12-01	Bovine coronavirus TCG-29 RNA, complete genome		bovine coronavirus tcg-29 rna, complete genome	tan2023
KF530077.1	USA: Nashville, TN	Betacoronavirus	Embecovirus	Betacoronavirus 1	30577	Homo sapiens	Homo	sapiens	Humans	1987-03-12	Human coronavirus OC43 strain OC43/human/USA/873-16/1987, complete genome		Homo sapiens; sex: F; age: 27Y	tan2023
KP209310.1	United Arab Emirates	Betacoronavirus	Merbecovirus	Middle East respiratory syndrome-related coronavirus	30123	Homo sapiens	Homo	sapiens	Humans	2014-03-07	Middle East respiratory syndrome coronavirus strain Abu Dhabi/Gayathi_UAE_2_2014, complete genome	sputum	Homo sapiens	tan2023
EF424615.1	USA:Ohio	Betacoronavirus	Embecovirus	Betacoronavirus 1	31017	Bovinae			Bovines		Bovine coronavirus E-AH65, complete genome		bovine	tan2023
MT820627.1	China	Alphacoronavirus	Luchacovirus	Lucheng Rn rat coronavirus	29147	Eothenomys miletus	Eothenomys	miletus	Voles	2014-01-01	Lucheng Rn rat coronavirus isolate Lijiang-71, complete genome		Eothenomys miletus	tan2023
AY595412.1		Betacoronavirus	Sarbecovirus	Severe acute respiratory syndrome-related coronavirus	29716						SARS coronavirus LLJ-2004, complete genome	aerosol sample	sars coronavirus llj-2004, complete genome	tan2023
LC315649.2	Japan: Tokyo	Betacoronavirus	Embecovirus	Betacoronavirus 1	30737	Homo sapiens	Homo	sapiens	Humans	2016-01-01	Human coronavirus OC43 Tokyo/SGH-65/2016 RNA, complete genome	nasal swab using HBTE-ALI cells	Homo sapiens	tan2023
JQ989271.1	China	Alphacoronavirus	Decacovirus	Bat coronavirus HKU10	28489	Chiroptera			Bats	2005-10-01	Rousettus bat coronavirus HKU10 isolate 175A, complete genome		bat	tan2023
MN310476.1	USA	Betacoronavirus	Embecovirus	Betacoronavirus 1	30562	Homo sapiens	Homo	sapiens	Humans	2019-01-01	Human coronavirus OC43 strain HCoV_OC43/Seattle/USA/SC9428/2018, complete genome		Homo sapiens	tan2023
ON128612.1	China	Betacoronavirus	Embecovirus	Human coronavirus HKU1	29695	Homo sapiens	Homo	sapiens	Humans	2018-10-30	Human coronavirus HKU1 isolate WZ17244, complete genome		Homo sapiens	tan2023
FJ938068.1		Betacoronavirus	Embecovirus	Murine coronavirus	31250	Rattus	Rattus		Rodents		Rat coronavirus Parker, complete genome		rat	tan2023
MZ081381.1	China	Betacoronavirus	Sarbecovirus	Betacoronavirus sp. RpYN06	29793	Rhinolophus pusillus	Rhinolophus	pusillus	Bats	2020-05-25	Betacoronavirus sp. RpYN06 strain bat/Yunnan/RpYN06/2020, complete genome	bat feces	Rhinolophus pusillus	tan2023
OK017849.1	China: Yunnan	Betacoronavirus	Sarbecovirus	Sarbecovirus sp.	30118	Rhinolophus sinicus	Rhinolophus	sinicus	Bats	2016-08-01	Sarbecovirus sp. isolate YN2016C, complete genome		Rhinolophus sinicus	tan2023
MW685622.1	Haiti	Deltacoronavirus	Buldecovirus	Coronavirus HKU15	25444	Homo sapiens	Homo	sapiens	Humans	2014-12-15	Porcine deltacoronavirus isolate PDCoV/Haiti/Human/0081-4/2014, complete genome	plasma	Homo sapiens	tan2023
FJ882928.1	USA: Tennessee	Betacoronavirus	Sarbecovirus	Severe acute respiratory syndrome-related coronavirus	29687					2007-08-28	SARS coronavirus ExoN1 isolate P1pp1, complete genome		sars coronavirus exon1 isolate p1pp1, complete genome	tan2023
NC_028833.1	China	Alphacoronavirus	Nyctacovirus	Nyctalus velutinus alphacoronavirus SC-2013	27783	Nyctalus velutinus	Nyctalus	velutinus	Bats	2013-01-01	BtNv-AlphaCoV/SC2013, complete genome		Nyctalus velutinus	tan2023
FJ882961.1	USA: Tennessee	Betacoronavirus	Sarbecovirus	Severe acute respiratory syndrome-related coronavirus	29720					2008-11-25	SARS coronavirus MA15 isolate P3pp5, complete genome		sars coronavirus ma15 isolate p3pp5, complete genome	tan2023
AY597011.2		Betacoronavirus	Embecovirus	Human coronavirus HKU1	29926	Homo sapiens	Homo	sapiens	Humans		Human coronavirus HKU1 genotype A, complete genome	patient with pneumonia	Homo sapiens	tan2023
MW681002.1	China	Betacoronavirus	Sarbecovirus	Severe acute respiratory syndrome-related coronavirus	30146	Rhinolophus sinicus	Rhinolophus	sinicus	Bats	2020-04-29	Severe acute respiratory syndrome-related coronavirus isolate Rs56, complete genome	anal swab	Rhinolophus sinicus	tan2023
OK500300.1	China	Betacoronavirus	Embecovirus	Betacoronavirus 1	30556	Homo sapiens	Homo	sapiens	Humans	2019-11-17	Human coronavirus OC43 strain OC43/China/56/2019, complete genome	nasopharyngeal_swab	Homo sapiens	tan2023
AY686864.1		Betacoronavirus	Sarbecovirus	Severe acute respiratory syndrome-related coronavirus	29525	palm civet			Civets		SARS coronavirus B039, complete genome		palm civet	tan2023
MH687966.1	Viet Nam	Alphacoronavirus	Unknown	Alphacoronavirus sp.	28389	Scotophilus kuhlii	Scotophilus	kuhlii	Bats	2015-02-06	Alphacoronavirus sp. strain VZ_AlphaCoV_20745_6, complete genome		Scotophilus kuhlii	tan2023
MT984592.1	Belarus	Gammacoronavirus	Igacovirus	Avian coronavirus	27666	Gallus gallus	Gallus	gallus	Birds	2011-01-01	Avian coronavirus strain D1656/2/2011/BY, complete genome		Gallus gallus	tan2023
MW938760.1	Hong Kong	Betacoronavirus	Embecovirus	Betacoronavirus 1	30742	Homo sapiens	Homo	sapiens	Humans	2019-08-08	Human coronavirus OC43 isolate HK19-01, complete genome	bronchoalveolar lavage	Homo sapiens	tan2023
KT266822.1	China: Sichuan	Deltacoronavirus	Buldecovirus	Coronavirus HKU15	25404	Sus	Sus		Pigs	2012-01-01	Porcine deltacoronavirus strain CH/Sichuan/S27/2012, complete genome	fecal sample	pig	tan2023
MW246797.1	Italy	Betacoronavirus	Unknown	Betacoronavirus Erinaceus	30807	Erinaceus europaeus	Erinaceus	europaeus	Hedgehogs	2018-01-01	Betacoronavirus Erinaceus isolate ErinaceusCoV/Italy/50265-1/2018, complete genome	feces	Erinaceus europaeus	tan2023
LC494141.1	Japan	Betacoronavirus	Embecovirus	Betacoronavirus 1	30950	Bovinae			Bovines	2016-01-01	Bovine coronavirus IWT-15 RNA, complete genome		bovine coronavirus iwt-15 rna, complete genome	tan2023
MH687937.1	Viet Nam	Alphacoronavirus	Unknown	Alphacoronavirus sp.	28236	Scotophilus kuhlii	Scotophilus	kuhlii	Bats	2014-06-17	Alphacoronavirus sp. strain VZ_AlphaCoV_16715_32, complete genome		Scotophilus kuhlii	tan2023
AY463059.1		Betacoronavirus	Sarbecovirus	Severe acute respiratory syndrome-related coronavirus	29592						SARS coronavirus ShanghaiQXC1, complete genome		sars coronavirus shanghaiqxc1, complete genome	tan2023
MH687976.1	Viet Nam	Betacoronavirus	Unknown	Betacoronavirus sp.	31095	Rattus argentiventer	Rattus	argentiventer	Rodents	2015-02-04	Betacoronavirus sp. strain VZ_BetaCoV_22084_1, complete genome		Rattus argentiventer	tan2023
MF769420.1	China	Alphacoronavirus	Rhinacovirus	Swine acute diarrhea syndrome coronavirus	27173	Sus	Sus		Pigs	2017-01-01	Swine acute diarrhea syndrome coronavirus isolate 246, complete genome		swine	tan2023
MK977618.1	China	Alphacoronavirus	Rhinacovirus	Swine enteric alphacoronavirus	27155	Sus	Sus		Pigs	2018-01-01	Swine enteric alphacoronavirus strain SeACoV-p10, complete genome		swine	tan2023
KY933089.1	United Kingdom	Gammacoronavirus	Igacovirus	Avian coronavirus	27573	Aves			Birds		Avian coronavirus strain 1148-A, complete genome		chicken	tan2023
MZ190137.1	Russia: Sochi	Betacoronavirus	Sarbecovirus	Bat SARS-like coronavirus Khosta-1	28878	Rhinolophus ferrumequinum	Rhinolophus	ferrumequinum	Bats	2020-01-01	Bat SARS-like coronavirus Khosta-1 strain BtCoV/Khosta-1/Rh/Russia/2020, complete genome	feces pool	Rhinolophus ferrumequinum (bat)	tan2023
MN520209.1	China: Jiangsu	Deltacoronavirus	Buldecovirus	Coronavirus HKU15	25413	Sus	Sus		Pigs	2019-01-01	UNVERIFIED: Porcine deltacoronavirus isolate JS2019-A1414, complete genome		unverified: porcine deltacoronavirus isolate js2019-a1414, complete genome	tan2023
OK017797.1	China: Liaoning	Betacoronavirus	Sarbecovirus	Sarbecovirus sp.	29167	Rhinolophus ferrumequinum	Rhinolophus	ferrumequinum	Bats	2020-09-01	Sarbecovirus sp. isolate LN2020E, complete genome		Rhinolophus ferrumequinum	tan2023
HG994852.1		Betacoronavirus	Sarbecovirus	Severe acute respiratory syndrome-related coronavirus	29900						Severe acute respiratory syndrome-related coronavirus isolate H_SC_01 genome assembly, complete genome: monopartite		severe acute respiratory syndrome-related coronavirus isolate h_sc_01 genome assembly, complete genome: monopartite	tan2023
MK211371.1	China	Alphacoronavirus	Pedacovirus	Coronavirus BtSk-AlphaCoV/GX2018C	28146	Scotophilus kuhlii	Scotophilus	kuhlii	Bats	2017-05-01	Coronavirus BtSk-AlphaCoV/GX2018C, complete genome		Scotophilus kuhlii	tan2023
MG837130.1	South Korea	Deltacoronavirus	Buldecovirus	Coronavirus HKU15	25422	Sus	Sus		Pigs	2016-11-01	Porcine deltacoronavirus isolate KNU16-07-P5, complete genome		pig	tan2023
MN306043.1	USA	Betacoronavirus	Embecovirus	Betacoronavirus 1	30716	Homo sapiens	Homo	sapiens	Humans	2019-01-01	Human coronavirus OC43 strain HCoV_OC43/Seattle/USA/SC0841/2019, complete genome		Homo sapiens	tan2023
MH687954.1	Viet Nam	Alphacoronavirus	Unknown	Alphacoronavirus sp.	28240	Scotophilus kuhlii	Scotophilus	kuhlii	Bats	2014-09-18	Alphacoronavirus sp. strain VZ_AlphaCoV_16845_24, complete genome		Scotophilus kuhlii	tan2023
AP006557.1		Betacoronavirus	Sarbecovirus	Severe acute respiratory syndrome-related coronavirus	29727						SARS coronavirus TWH genomic RNA, complete genome	cultured virus from patient #01 with severe acute respiratory syndrome (SARS)	sars coronavirus twh genomic rna, complete genome	tan2023
MW727454.1	China	Alphacoronavirus	Rhinacovirus	Rhinolophus bat coronavirus HKU2	27171	Sus	Sus		Pigs	2018-09-01	Porcine enteric alphacoronavirus isolate GDZQ-2018, complete genome	intestine	porcine	tan2023
HQ890529.1	USA: Nashville, TN	Betacoronavirus	Sarbecovirus	Severe acute respiratory syndrome-related coronavirus	29646	Mus musculus	Mus	musculus	Rodents	2008-10-08	SARS coronavirus MA15 ExoN1 isolate d2ym4, complete genome		Mus musculus; young	tan2023
GQ427173.1	USA	Gammacoronavirus	Igacovirus	Avian coronavirus	27770	Aves			Birds	2003-01-01	Turkey coronavirus strain TCoV/VA-74/03, complete genome		turkey	tan2023
ON284431.1	France	Betacoronavirus	Sarbecovirus	Severe acute respiratory syndrome-related coronavirus	29703	Homo sapiens	Homo	sapiens	Humans	2020-10-26	Severe acute respiratory syndrome coronavirus 2 isolate SARS-CoV-2/human/FRA/IHUCOVID-010884_Illu1/2020, complete genome		Homo sapiens	tan2023
JF292921.1	USA: Nashville, TN	Betacoronavirus	Sarbecovirus	Severe acute respiratory syndrome-related coronavirus	29646					2009-03-18	SARS coronavirus wtic-MB isolate c1P1, complete genome		sars coronavirus wtic-mb isolate c1p1, complete genome	tan2023
KU665558.1	China	Deltacoronavirus	Buldecovirus	Coronavirus HKU15	25370	Sus	Sus		Pigs	2014-06-26	Porcine deltacoronavirus strain CHN-LYG-2014, complete genome	pig fecal sample	porcine deltacoronavirus strain chn-lyg-2014, complete genome	tan2023
LC494140.1	Japan	Betacoronavirus	Embecovirus	Betacoronavirus 1	30939	Bovinae			Bovines	2015-11-01	Bovine coronavirus IWT-14 RNA, complete genome		bovine coronavirus iwt-14 rna, complete genome	tan2023
FJ938059.1	Netherlands: Utrecht	Alphacoronavirus	Tegacovirus	Alphacoronavirus 1	29295	Felis	Felis		Felines	2007-06-05	Feline coronavirus UU10, complete genome		cat	tan2023
KJ601780.1	USA: Ohio	Deltacoronavirus	Buldecovirus	Coronavirus HKU15	25404	Sus	Sus		Pigs	2014-01-26	Deltacoronavirus PDCoV/USA/Ohio137/2014 from USA, complete genome		swine	tan2023
KY674915.1	USA	Alphacoronavirus	Setracovirus	Human coronavirus NL63	27302	Homo sapiens	Homo	sapiens	Humans	2016-01-01	Human coronavirus NL63 strain N07-6B, complete genome		Homo sapiens	tan2023
GQ153542.1		Betacoronavirus	Sarbecovirus	Severe acute respiratory syndrome-related coronavirus	29716	Chiroptera			Bats		Bat SARS coronavirus HKU3-7, complete genome		bat sars coronavirus hku3-7, complete genome	tan2023
MZ293733.1	Cambodia	Unknown	Unknown	Scotophilus bat coronavirus	28310	Scotophilus kuhlii	Scotophilus	kuhlii	Bats	2012-05-30	Scotophilus bat coronavirus isolate PREDICT/GCS-008, complete genome	rectal swab	Scotophilus kuhlii	tan2023
MG757142.1	France	Betacoronavirus	Embecovirus	Betacoronavirus 1	30939	Bovinae			Bovines	2014-01-01	Bovine coronavirus isolate ICSA-pool-LBA, complete genome	bronchoalveolar lavage	cattle	tan2023
EU186072.1	USA	Alphacoronavirus	Tegacovirus	Alphacoronavirus 1	29256	Felinae			Felines		Feline coronavirus isolate Black, complete genome		feline coronavirus isolate black, complete genome	tan2023
EF203066.1		Alphacoronavirus	Rhinacovirus	Rhinolophus bat coronavirus HKU2	27164	Chiroptera			Bats		Bat coronavirus HKU2 strain HKU2/HK/298/2006, complete genome		bat coronavirus hku2 strain hku2/hk/298/2006, complete genome	tan2023
MT984601.1	Romania	Gammacoronavirus	Igacovirus	Avian coronavirus	27779	Gallus gallus	Gallus	gallus	Birds	2017-01-01	Avian coronavirus strain D4000/3/2017/RO, complete genome		Gallus gallus	tan2023
MW246796.1	Italy	Betacoronavirus	Unknown	Betacoronavirus Erinaceus	30846	Erinaceus europaeus	Erinaceus	europaeus	Hedgehogs	2018-01-01	Betacoronavirus Erinaceus isolate ErinaceusCoV/Italy/50265-19/2018, complete genome	feces	Erinaceus europaeus	tan2023
OL674076.1	China: Yunnan, Puer	Betacoronavirus	Sarbecovirus	Severe acute respiratory syndrome-related coronavirus	29780	Rhinolophus stheno	Rhinolophus	stheno	Bats	2015-05-29	Severe acute respiratory syndrome-related coronavirus isolate Rs7907, complete genome	anal swab	Rhinolophus stheno	tan2023
KY554974.1	USA	Betacoronavirus	Embecovirus	Betacoronavirus 1	30713	Homo sapiens	Homo	sapiens	Humans	2016-01-01	Human coronavirus OC43 strain N08-33B_360X, complete genome		Homo sapiens	tan2023
KF923914.1	China: Beijing	Betacoronavirus	Embecovirus	Betacoronavirus 1	30713	Homo sapiens	Homo	sapiens	Humans	2007-06-01	Human coronavirus OC43 isolate 5508/2007, complete genome	nasal and throat swab	Homo sapiens	tan2023
MN757859.1	Costa Rica	Gammacoronavirus	Igacovirus	Avian coronavirus	27696	Gallus gallus	Gallus	gallus	Birds	2016-09-05	Avian coronavirus isolate CK/CR/1160/16, complete genome		Gallus gallus (broiler)	tan2023
OK500302.1	China	Betacoronavirus	Embecovirus	Betacoronavirus 1	30664	Homo sapiens	Homo	sapiens	Humans	2019-12-19	Human coronavirus OC43 strain OC43/China/58/2019, complete genome	nasopharyngeal_swab	Homo sapiens	tan2023
MG762674.1	China	Betacoronavirus	Nobecovirus	Rousettus bat coronavirus HKU9	29134	Rousettus	Rousettus		Bats	2009-11-01	Rousettus bat coronavirus HKU9 isolate Rousettus spp/Jinghong/2009, complete genome		Rousettus sp.	tan2023
KP143507.1	United Kingdom	Alphacoronavirus	Tegacovirus	Alphacoronavirus 1	28984	Felis catus	Felis	catus	Felines	2013-01-01	Feline coronavirus isolate 27C, complete genome		Felis catus	tan2023
MW411432.1	China	Betacoronavirus	Embecovirus	Betacoronavirus 1	30726	Homo sapiens	Homo	sapiens	Humans	2020-06-04	UNVERIFIED: Human coronavirus OC43 isolate Shenzhen/Nanshan/20200604/LKH, complete genome		Homo sapiens	tan2023
LC687399.1	Japan: Fukushima	Betacoronavirus	Embecovirus	Betacoronavirus 1	30677	Homo sapiens	Homo	sapiens	Humans	2019-01-01	Human coronavirus OC43 Fukushima_H773_2019 RNA, complete genome	nasopharyngeal swab	Homo sapiens	tan2023
MN520190.1	China: Anhui	Deltacoronavirus	Buldecovirus	Coronavirus HKU15	25417	Sus	Sus		Pigs	2018-03-01	UNVERIFIED: Porcine deltacoronavirus isolate AH2018-322, complete genome		unverified: porcine deltacoronavirus isolate ah2018-322, complete genome	tan2023
KF923924.1	China: Beijing	Betacoronavirus	Embecovirus	Betacoronavirus 1	30713	Homo sapiens	Homo	sapiens	Humans	2010-07-01	Human coronavirus OC43 isolate 10290/2010, complete genome	nasal and throat swab	Homo sapiens	tan2023
AF201929.1		Betacoronavirus	Embecovirus	Murine coronavirus	31276	Murinae			Rodents		Murine hepatitis virus strain 2, complete genome		murine hepatitis virus strain 2, complete genome	tan2023
MG757596.1	Saudi Arabia	Betacoronavirus	Merbecovirus	Middle East respiratory syndrome-related coronavirus	30096	Homo sapiens	Homo	sapiens	Humans	2015-08-24	Middle East respiratory syndrome-related coronavirus isolate Hu/Riyadh-KSA-006D1S/2015, complete genome	sputum	Homo sapiens	tan2023
OK017858.1	China: Yunnan	Betacoronavirus	Sarbecovirus	Sarbecovirus sp.	29485	Rhinolophus sinicus	Rhinolophus	sinicus	Bats	2020-06-01	Sarbecovirus sp. isolate YN2020H, complete genome		Rhinolophus sinicus	tan2023
KF923888.1	China: Beijing	Betacoronavirus	Embecovirus	Betacoronavirus 1	30719	Homo sapiens	Homo	sapiens	Humans	2010-07-01	Human coronavirus OC43 isolate 2145A/2010, complete genome	nasopharyngeal aspirate	Homo sapiens	tan2023
DQ811786.2	USA:Ohio	Alphacoronavirus	Tegacovirus	Alphacoronavirus 1	27904	Sus	Sus		Pigs	1987-01-01	TGEV Miller M60, complete genome		porcine	tan2023
KX538975.1	Malaysia: Kuala Lumpur	Betacoronavirus	Embecovirus	Betacoronavirus 1	30716	Homo sapiens	Homo	sapiens	Humans	2012-08-24	Human coronavirus OC43 isolate MY-U1024/12, complete genome	nasopharyngeal swab	Homo sapiens	tan2023
LT898446.1		Alphacoronavirus	Pedacovirus	Porcine epidemic diarrhea virus	28029	Sus	Sus		Pigs		Porcine epidemic diarrhea virus isolate PEDV_GER_L00933-K22_14-05_2014 genome assembly, complete genome: monopartite		porcine epidemic diarrhea virus isolate pedv_ger_l00933-k22_14-05_2014 genome assembly, complete genome: monopartite	tan2023
MN611518.1	China	Alphacoronavirus	Minunacovirus	Miniopterus pusillus bat coronavirus HKU8-related	28751	Miniopterus pusillus	Miniopterus	pusillus	Bats	2018-03-01	Miniopterus pusillus bat coronavirus HKU8-related isolate 6610, complete genome		Miniopterus pusillus	tan2023
KY983583.1	USA	Betacoronavirus	Embecovirus	Betacoronavirus 1	30668	Homo sapiens	Homo	sapiens	Humans	2015-01-01	Human coronavirus OC43 strain HCoV_OC43/Seattle/USA/SC2481/2015, complete genome		Homo sapiens	tan2023
MW165329.1	Taiwan	Alphacoronavirus	Pedacovirus	Porcine epidemic diarrhea virus	27754	Sus	Sus		Pigs	2013-07-01	Porcine epidemic diarrhea virus isolate 4-2, complete genome	small intestine	suckling pig	tan2023
KY566209.1	China	Alphacoronavirus	Tegacovirus	Alphacoronavirus 1	29440	Felis	Felis		Felines	2016-11-01	Feline coronavirus strain HLJ/HRB/2016/10, complete genome	ascites	cat	tan2023
GQ504724.1	USA	Gammacoronavirus	Igacovirus	Avian coronavirus	27475	Aves			Birds	1941-01-01	Infectious bronchitis virus strain Massachusetts, complete genome		chicken	tan2023
AY613950.1	China	Betacoronavirus	Sarbecovirus	Severe acute respiratory syndrome-related coronavirus	29728	palm civet			Civets		SARS coronavirus PC4-227, complete genome		palm civet	tan2023
MT260150.1	China	Deltacoronavirus	Buldecovirus	Coronavirus HKU15	25453	Sus	Sus		Pigs	2018-06-05	Porcine deltacoronavirus isolate HNZK-02-P15, complete genome		swine	tan2023
MH687944.1	Viet Nam	Alphacoronavirus	Unknown	Alphacoronavirus sp.	28219	Scotophilus kuhlii	Scotophilus	kuhlii	Bats	2014-06-10	Alphacoronavirus sp. strain VZ_AlphaCoV_16715_53, complete genome		Scotophilus kuhlii	tan2023
MT782115.1	USA	Betacoronavirus	Sarbecovirus	Severe acute respiratory syndrome-related coronavirus	29781	Chiroptera			Bats	2008-12-16	Mutant Bat SARS coronavirus HKU3 isolate icHKU3-SRBD-MA, complete genome		mutant bat sars coronavirus hku3 isolate ichku3-srbd-ma, complete genome	tan2023
KF923908.1	China: Beijing	Betacoronavirus	Embecovirus	Betacoronavirus 1	30713	Homo sapiens	Homo	sapiens	Humans	2007-06-01	Human coronavirus OC43 isolate 5414/2007, complete genome	nasal and throat swab	Homo sapiens	tan2023
MK334043.1	China	Alphacoronavirus	Setracovirus	Human coronavirus NL63	27516	Homo sapiens	Homo	sapiens	Humans	2018-08-15	Human coronavirus NL63 strain ChinaGD02, complete genome	nasopharyngeal swab	Homo sapiens	tan2023
KY419104.1	USA	Betacoronavirus	Embecovirus	Betacoronavirus 1	30530	Sus scrofa	Sus	scrofa	Pigs	2015-08-15	Porcine hemagglutinating encephalomyelitis virus strain PHEV-CoV/swine/USA/15TOSU0331/2015, complete genome	nasal swab	Sus scrofa scrofa	tan2023
KY417145.1	China	Betacoronavirus	Sarbecovirus	Severe acute respiratory syndrome-related coronavirus	29710	Rhinolophus ferrumequinum	Rhinolophus	ferrumequinum	Bats	2012-09-18	Bat SARS-like coronavirus isolate Rf4092, complete genome		Rhinilophus ferrumequinum	tan2023
FJ938052.1	Netherlands: Utrecht	Alphacoronavirus	Tegacovirus	Alphacoronavirus 1	29306	Felis	Felis		Felines	2007-06-05	Feline coronavirus UU11, complete genome		cat	tan2023
HQ890528.1	USA: Nashville, TN	Betacoronavirus	Sarbecovirus	Severe acute respiratory syndrome-related coronavirus	29646	Mus musculus	Mus	musculus	Rodents	2008-10-08	SARS coronavirus MA15 ExoN1 isolate d2ym3, complete genome		Mus musculus; young	tan2023
MW593201.1	USA: Washington	Betacoronavirus	Sarbecovirus	Severe acute respiratory syndrome-related coronavirus	29798	Homo sapiens	Homo	sapiens	Humans	2020-03-16	Severe acute respiratory syndrome coronavirus 2 isolate SARS-CoV-2/human/USA/FHCRC-1046/2020, complete genome	nasal swab	Homo sapiens	tan2023
MZ081379.1	China	Betacoronavirus	Sarbecovirus	Betacoronavirus sp. RsYN03	29737	Rhinolophus sinicus	Rhinolophus	sinicus	Bats	2019-10-22	Betacoronavirus sp. RsYN03 strain bat/Yunnan/RsYN03/2019, complete genome	bat feces	Rhinolophus sinicus	tan2023
LC654447.1	Japan: Fukushima	Betacoronavirus	Embecovirus	Human coronavirus HKU1	29900	Homo sapiens	Homo	sapiens	Humans	2020-01-01	Human coronavirus HKU1 Fukushima_H815_2020 RNA, complete genome		Homo sapiens	tan2023
MN165107.1	China: Changsha	Alphacoronavirus	Tegacovirus	Alphacoronavirus 1	29286	Felis catus	Felis	catus	Felines	2018-04-01	Feline coronavirus isolate XXN, complete genome		Felis catus	tan2023
KF514406.1	USA: Nashville, TN	Betacoronavirus	Sarbecovirus	Severe acute respiratory syndrome-related coronavirus	29687					2009-03-18	SARS coronavirus ExoN1 strain SARS/VeroE6_lab/USA/ExoN1_c13P1/2009, complete genome		sars coronavirus exon1 strain sars/veroe6_lab/usa/exon1_c13p1/2009, complete genome	tan2023
HQ890537.1	USA: Nashville, TN	Betacoronavirus	Sarbecovirus	Severe acute respiratory syndrome-related coronavirus	29646	Mus musculus	Mus	musculus	Rodents	2008-09-17	SARS coronavirus MA15 ExoN1 isolate d2om4, complete genome		Mus musculus; old	tan2023
KF923900.1	China: Beijing	Betacoronavirus	Embecovirus	Betacoronavirus 1	30722	Homo sapiens	Homo	sapiens	Humans	2006-10-01	Human coronavirus OC43 isolate 3647/2006, complete genome	nasal and throat swab	Homo sapiens	tan2023
MF598709.1	United Arab Emirates	Betacoronavirus	Merbecovirus	Middle East respiratory syndrome-related coronavirus	30123	Camelus dromedarius	Camelus	dromedarius	Camelids	2015-04-01	Middle East respiratory syndrome-related coronavirus strain camel/UAE_414485_W4_2015, complete genome	nasopharyngeal swab	Camelus dromedarius	tan2023
MT906865.1	United Kingdom	Alphacoronavirus	Tegacovirus	Alphacoronavirus 1	29321	Canis	Canis		Canines	2020-01-01	Canine coronavirus strain 2020/7, complete genome	feces	domestic dog	tan2023
NC_016991.1	China: Hong Kong	Deltacoronavirus	Buldecovirus	White-eye coronavirus HKU16	26041	Aves			Birds	2007-01-01	White-eye coronavirus HKU16, complete genome		white-eye	tan2023
JQ765572.1	USA: Denver, CO	Alphacoronavirus	Setracovirus	Human coronavirus NL63	27487	Homo sapiens	Homo	sapiens	Humans	2005-02-01	Human coronavirus NL63 strain NL63/DEN/2005/347, complete genome	nasal pharyngeal wash from a 4.4 year old male	Homo sapiens; sex: M	tan2023
MN514962.1	Ethiopia	Betacoronavirus	Embecovirus	Betacoronavirus 1	31021	Camelus dromedarius	Camelus	dromedarius	Camelids	2015-02-21	Dromedary camel coronavirus HKU23 isolate DcCoV-HKU23/camel/Ethiopia/CAC1019/2015, complete genome		Camelus dromedarius	tan2023
JF292903.1	USA: Nashville, TN	Betacoronavirus	Sarbecovirus	Severe acute respiratory syndrome-related coronavirus	29645	Mus musculus	Mus	musculus	Rodents	2008-10-10	SARS coronavirus MA15 ExoN1 isolate d4ym5, complete genome		Mus musculus; young	tan2023
KF686346.1	USA: Denver, CO	Betacoronavirus	Embecovirus	Human coronavirus HKU1	29982	Homo sapiens	Homo	sapiens	Humans	2010-01-09	Human coronavirus HKU1 strain HKU1/human/USA/HKU1-12/2010, complete genome		Homo sapiens	tan2023
MF769429.1	China	Alphacoronavirus	Rhinacovirus	Swine acute diarrhea syndrome coronavirus	27173	Sus	Sus		Pigs	2017-01-01	Swine acute diarrhea syndrome coronavirus isolate 27, complete genome		swine	tan2023
KU521535.1	USA	Alphacoronavirus	Setracovirus	Human coronavirus NL63	27553	Homo sapiens	Homo	sapiens	Humans	2015-09-01	Human coronavirus NL63 isolate NL63/UF-2/2015, complete genome	nasopharyngeal swab	Homo sapiens	tan2023
LC494183.1	Japan	Betacoronavirus	Embecovirus	Betacoronavirus 1	30936	Bovinae			Bovines	2017-12-01	Bovine coronavirus TCG-24 RNA, complete genome		bovine coronavirus tcg-24 rna, complete genome	tan2023
KY674920.1	USA	Betacoronavirus	Embecovirus	Betacoronavirus 1	30581	Homo sapiens	Homo	sapiens	Humans	2016-01-01	Human coronavirus OC43 strain N09-595B, complete genome		Homo sapiens	tan2023
MN982199.1	China	Betacoronavirus	Embecovirus	Betacoronavirus 1	31028	Bovinae			Bovines	2018-11-01	Bovine coronavirus isolate BCOV-China/SWUN/A10/2018, complete genome	feces	calf	tan2023
KY566211.1	China	Alphacoronavirus	Tegacovirus	Alphacoronavirus 1	29337	Felis	Felis		Felines	2016-11-01	Feline coronavirus strain HLJ/HRB/2016/13, complete genome	ascites	cat	tan2023
KY063617.1	China	Alphacoronavirus	Tegacovirus	Alphacoronavirus 1	29264	Canis	Canis		Canines	2016-07-01	Canine coronavirus isolate HLJ-072, complete genome	feces	dog	tan2023
MZ081385.1	China	Alphacoronavirus	Unknown	Alphacoronavirus sp.	29201	Myotis muricola	Myotis	muricola	Bats	2020-04-18	Alphacoronavirus sp. strain bat/Yunnan/MmYN16/2020, complete genome	bat feces	Myotis muricola	tan2023
OK017814.1	China: Guangdong	Betacoronavirus	Sarbecovirus	Sarbecovirus sp.	29550	Rhinolophus sinicus	Rhinolophus	sinicus	Bats	2017-09-01	Sarbecovirus sp. isolate GD2017H, complete genome		Rhinolophus sinicus	tan2023
AJ271965.2	USA:Indiana	Alphacoronavirus	Tegacovirus	Alphacoronavirus 1	28586	Sus	Sus		Pigs		Transmissible gastroenteritis virus complete genome, genomic RNA		pig	tan2023
DQ445912.1	Netherlands	Alphacoronavirus	Setracovirus	Human coronavirus NL63	27535	Homo	Homo		Humans		Human coronavirus NL63 isolate Amsterdam 496, complete genome	lysed respiratory material from patient	human coronavirus nl63 isolate amsterdam 496, complete genome	tan2023
KF514420.1	USA: Nashville, TN	Betacoronavirus	Sarbecovirus	Severe acute respiratory syndrome-related coronavirus	29687					2009-05-19	SARS coronavirus ExoN1 strain SARS/VeroE6_lab/USA/ExoN1_c5P10/2009, complete genome		sars coronavirus exon1 strain sars/veroe6_lab/usa/exon1_c5p10/2009, complete genome	tan2023
MF769428.1	China	Alphacoronavirus	Rhinacovirus	Swine acute diarrhea syndrome coronavirus	27173	Sus	Sus		Pigs	2017-01-01	Swine acute diarrhea syndrome coronavirus isolate 53, complete genome		swine	tan2023
MZ937000.1	Laos	Unknown	Unknown	Bat coronavirus	29838	Rhinolophus malayanus	Rhinolophus	malayanus	Bats	2020-07-05	Bat coronavirus isolate BANAL-20-52/Laos/2020, complete genome	rectal swabs	Rhinolophus malayanus	tan2023
OK017843.1	China: Jiangxi	Betacoronavirus	Sarbecovirus	Sarbecovirus sp.	29537	Rhinolophus sinicus	Rhinolophus	sinicus	Bats	2021-07-01	Sarbecovirus sp. isolate JX2021N, complete genome		Rhinolophus sinicus	tan2023
OL956935.1	Sri Lanka	Alphacoronavirus	Unknown	Bat alphacoronavirus	27987	Miniopterus fuliginosus	Miniopterus	fuliginosus	Bats	2018-01-01	Bat alphacoronavirus isolate batCoV/MinFul/2018/SriLanka, complete genome	feces and rectal swabs	Miniopterus fuliginosus	tan2023
KY554972.1	USA	Betacoronavirus	Embecovirus	Betacoronavirus 1	30710	Homo sapiens	Homo	sapiens	Humans	2016-01-01	Human coronavirus OC43 strain N07-1541B_433X, complete genome		Homo sapiens	tan2023
OK067321.1	Madagascar: Maromizaha	Betacoronavirus	Nobecovirus	Rousettus madagascariensis nobecovirus	28980	Rousettus madagascariensis	Rousettus	madagascariensis	Bats	2018-09-11	Rousettus madagascariensis nobecovirus isolate MIZ240, complete genome	feces	Rousettus madagascariensis	tan2023
MW196362.1	USA: Illinois	Deltacoronavirus	Buldecovirus	Coronavirus HKU15	25447	Sus	Sus		Pigs	2019-01-01	Mutant Porcine deltacoronavirus strain USA/IL/2014/026PDV_P11, complete genome		swine	tan2023
KX538976.1	Malaysia: Kuala Lumpur	Betacoronavirus	Embecovirus	Betacoronavirus 1	30713	Homo sapiens	Homo	sapiens	Humans	2012-08-27	Human coronavirus OC43 isolate MY-U1057/12, complete genome	nasopharyngeal swab	Homo sapiens	tan2023
MK303621.1		Betacoronavirus	Embecovirus	Betacoronavirus 1	30664	Homo	Homo		Humans		Human coronavirus OC43 isolate MDS4, complete genome		human coronavirus oc43 isolate mds4, complete genome	tan2023
MT747186.1	China	Alphacoronavirus	Rhinacovirus	Swine acute diarrhea syndrome coronavirus	27163	Sus	Sus		Pigs	2017-02-01	Swine acute diarrhea syndrome coronavirus isolate SADS-CoV/CN/GDDCD/2017, complete genome	small intestine	swine	tan2023
MK334047.1	China	Alphacoronavirus	Setracovirus	Human coronavirus NL63	27532	Homo sapiens	Homo	sapiens	Humans	2018-07-25	Human coronavirus NL63 strain ChinaGD04, complete genome	nasopharyngeal swab	Homo sapiens	tan2023
AY646283.1		Gammacoronavirus	Igacovirus	Avian coronavirus	27503	Aves			Birds		Avian infectious bronchitis virus partridge/GD/S14/2003, complete genome		avian infectious bronchitis virus partridge/gd/s14/2003, complete genome	tan2023
MN509589.1	China	Gammacoronavirus	Igacovirus	Avian coronavirus	27753	Gallus gallus	Gallus	gallus	Birds	2011-01-01	Infectious bronchitis virus strain cK/CH/LHLJ/110664, complete genome		Gallus gallus	tan2023
MN611523.1	China	Alphacoronavirus	Decacovirus	Hipposideros pomona bat coronavirus HKU10-related	28514	Hipposideros pomona	Hipposideros	pomona	Bats	2018-03-01	Hipposideros pomona bat coronavirus HKU10-related isolate 160942, complete genome		Hipposideros pomona	tan2023
MK472067.1	Australia	Alphacoronavirus	Pedacovirus	Alphacoronavirus WA1087	28170	Chiroptera			Bats	2018-01-01	Alphacoronavirus sp. WA1087, complete genome		microbat	tan2023
EF065514.1	China: Guangdong province	Betacoronavirus	Nobecovirus	Rousettus bat coronavirus HKU9	29107	Chiroptera			Bats		Bat coronavirus HKU9-2, complete genome		bat	tan2023
MZ937002.1	Laos	Unknown	Unknown	Bat coronavirus	29437	Rhinolophus malayanus	Rhinolophus	malayanus	Bats	2020-07-07	Bat coronavirus isolate BANAL-20-116/Laos/2020, complete genome	rectal swabs	Rhinolophus malayanus	tan2023
KX083668.1	China	Alphacoronavirus	Tegacovirus	Alphacoronavirus 1	28580	Sus	Sus		Pigs	2015-01-01	Transmissible gastroenteritis virus isolate HE-1, complete genome		swine	tan2023
GU553363.1	China: Hong Kong	Betacoronavirus	Sarbecovirus	Severe acute respiratory syndrome-related coronavirus	29644	Homo sapiens	Homo	sapiens	Humans	2003-06-07	SARS coronavirus HKU-39849 isolate TCVSP-HARROD-00001, complete genome		Homo sapiens	tan2023
NC_010438.1	Hong Kong	Alphacoronavirus	Minunacovirus	Miniopterus bat coronavirus HKU8	28773	Chiroptera			Bats		Miniopterus bat coronavirus HKU8, complete genome		miniopterus bat coronavirus hku8, complete genome	tan2023
KU982979.1	USA: Minnesota	Alphacoronavirus	Pedacovirus	Porcine epidemic diarrhea virus	28003	Sus	Sus		Pigs	2015-11-04	Porcine epidemic diarrhea virus strain PEDV/USA/Minnesota131/2015, complete genome	ints	pig	tan2023
KY674914.1	USA	Alphacoronavirus	Duvinacovirus	Human coronavirus 229E	27055	Homo sapiens	Homo	sapiens	Humans	2016-01-01	Human coronavirus 229E strain HCoV_229E/Seattle/USA/SC399/2016, complete genome		Homo sapiens	tan2023
KF514422.1	USA: Nashville, TN	Betacoronavirus	Sarbecovirus	Severe acute respiratory syndrome-related coronavirus	29687					2010-10-01	SARS coronavirus wtic-MB strain SARS/VeroE6_lab/USA/WTic_c1.3P20/2010, complete genome		sars coronavirus wtic-mb strain sars/veroe6_lab/usa/wtic_c1.3p20/2010, complete genome	tan2023
KU215426.1	Belgium	Alphacoronavirus	Tegacovirus	Alphacoronavirus 1	29262	Felis catus	Felis	catus	Felines	2013-01-01	Feline coronavirus isolate Cat2_day84, complete genome		Felis catus	tan2023
EF424619.1	USA:Ohio	Betacoronavirus	Embecovirus	Betacoronavirus 1	30995	Bovinae			Bovines		Bovine coronavirus E-AH187, complete genome		bovine	tan2023
GU553362.1	Netherlands	Alphacoronavirus	Tegacovirus	Alphacoronavirus 1	29264	Felinae			Felines	2007-09-13	Feline coronavirus UU23 isolate TCVSP-ROTTIER-00023, complete genome		feline	tan2023
KY983584.1	USA	Betacoronavirus	Embecovirus	Human coronavirus HKU1	29932	Homo sapiens	Homo	sapiens	Humans	2015-01-01	Human coronavirus HKU1 strain SC2628, complete genome		Homo sapiens	tan2023
U00735.2		Betacoronavirus	Embecovirus	Betacoronavirus 1	31032	Bovinae			Bovines		Bovine coronavirus strain Mebus, complete genome		bovine coronavirus strain mebus, complete genome	tan2023
KX538973.1	Malaysia: Kuala Lumpur	Betacoronavirus	Embecovirus	Betacoronavirus 1	30716	Homo sapiens	Homo	sapiens	Humans	2012-07-16	Human coronavirus OC43 isolate MY-U868/12, complete genome	nasopharyngeal swab	Homo sapiens	tan2023
LC494184.1	Japan	Betacoronavirus	Embecovirus	Betacoronavirus 1	30940	Bovinae			Bovines	2017-12-01	Bovine coronavirus TCG-25 RNA, complete genome		bovine coronavirus tcg-25 rna, complete genome	tan2023
GU553365.1	USA	Betacoronavirus	Sarbecovirus	Severe acute respiratory syndrome-related coronavirus	29644	Chlorocebus aethiops	Chlorocebus	aethiops	Old_world_monkeys	2007-12-05	SARS coronavirus HKU-39849 isolate TCVSP-HARROD-00003, complete genome	green monkey lung	Chlorocebus aethiops	tan2023
KJ425508.1	China	Gammacoronavirus	Igacovirus	Avian coronavirus	27641	Gallus gallus	Gallus	gallus	Birds	2009-09-09	Infectious bronchitis virus strain ck/CH/LHN/090909, complete genome		Gallus gallus	tan2023
KX302875.1	China	Gammacoronavirus	Igacovirus	Avian coronavirus	27682	Gallus gallus	Gallus	gallus	Birds	2010-05-01	Infectious bronchitis virus strain ck/CH/LJL/100512, complete genome		Gallus gallus	tan2023
HQ890538.1	USA: Nashville, TN	Betacoronavirus	Sarbecovirus	Severe acute respiratory syndrome-related coronavirus	29646	Mus musculus	Mus	musculus	Rodents	2008-09-17	SARS coronavirus MA15 ExoN1 isolate d2om5, complete genome		Mus musculus; old	tan2023
KY354363.1	South Korea: Kyunggido	Deltacoronavirus	Buldecovirus	Coronavirus HKU15	25422	Sus	Sus		Pigs	2016-04-01	Porcine deltacoronavirus isolate DH1, complete genome		porcine	tan2023
KF514412.1	USA: Nashville, TN	Betacoronavirus	Sarbecovirus	Severe acute respiratory syndrome-related coronavirus	29687					2009-07-08	SARS coronavirus ExoN1 strain SARS/VeroE6_lab/USA/ExoN1_c13P20/2009, complete genome		sars coronavirus exon1 strain sars/veroe6_lab/usa/exon1_c13p20/2009, complete genome	tan2023
MH940245.1	Thailand	Betacoronavirus	Embecovirus	Human coronavirus HKU1	29811	Homo sapiens	Homo	sapiens	Humans	2017-06-04	Human coronavirus HKU1 isolate SI17244, complete genome		Homo sapiens	tan2023
EF065509.1	China: Guangdong province	Betacoronavirus	Merbecovirus	Pipistrellus bat coronavirus HKU5	30482	Chiroptera			Bats		Pipistrellus bat coronavirus HKU5, complete genome		bat	tan2023
OK500305.1	China	Betacoronavirus	Embecovirus	Betacoronavirus 1	30675	Homo sapiens	Homo	sapiens	Humans	2020-09-18	Human coronavirus OC43 strain OC43/China/73/2021, complete genome	nasopharyngeal_swab	Homo sapiens	tan2023
KP757891.1	China	Deltacoronavirus	Buldecovirus	Coronavirus HKU15	25420	Sus	Sus		Pigs	2014-12-26	Porcine deltacoronavirus isolate CHN-HB-2014, complete genome	pig feces	pig	tan2023
MN520197.1	China: Shandong	Deltacoronavirus	Buldecovirus	Coronavirus HKU15	25404	Sus	Sus		Pigs	2018-04-01	UNVERIFIED: Porcine deltacoronavirus isolate SD2018-4, complete genome		unverified: porcine deltacoronavirus isolate sd2018-4, complete genome	tan2023
KX499468.1	China	Alphacoronavirus	Tegacovirus	Alphacoronavirus 1	28614	Sus	Sus		Pigs	2015-12-22	Transmissible gastroenteritis virus strain TGEV AHHF, complete genome		porcine	tan2023
OM830319.1	USA	Alphacoronavirus	Tegacovirus	Alphacoronavirus 1	27547	Sus	Sus		Pigs	1993-06-01	Porcine respiratory coronavirus 310 isolate AR310, complete genome		porcine	tan2023
KF514411.1	USA: Nashville, TN	Betacoronavirus	Sarbecovirus	Severe acute respiratory syndrome-related coronavirus	29687					2009-05-19	SARS coronavirus ExoN1 strain SARS/VeroE6_lab/USA/ExoN1_c13P10/2009, complete genome		sars coronavirus exon1 strain sars/veroe6_lab/usa/exon1_c13p10/2009, complete genome	tan2023
OM830320.1	United Kingdom	Alphacoronavirus	Tegacovirus	Alphacoronavirus 1	27776	Sus	Sus		Pigs	1986-09-01	Porcine respiratory coronavirus 137 isolate 86/135308, complete genome		porcine	tan2023
MH002339.1	China	Betacoronavirus	Merbecovirus	Tylonycteris bat coronavirus HKU4	30280	Tylonycteris pachypus	Tylonycteris	pachypus	Bats	2014-04-23	Tylonycteris bat coronavirus HKU4 isolate SZ140324, complete genome		Tylonycteris pachypus	tan2023
LC364344.1	United Arab Emirates	Deltacoronavirus	Buldecovirus	Pigeon coronavirus UAE-HKU29	26155	Columbidae			Birds	2017-03-28	Pigeon coronavirus UAE-HKU29 271F genomic RNA, complete genome		Columbidae sp. (Pigeon)	tan2023
AY559089.1	Singapore	Betacoronavirus	Sarbecovirus	Severe acute respiratory syndrome-related coronavirus	29717						SARS coronavirus SinP2, complete genome		sars coronavirus sinp2, complete genome	tan2023
DQ640652.1	China	Betacoronavirus	Sarbecovirus	Severe acute respiratory syndrome-related coronavirus	29746	Homo sapiens	Homo	sapiens	Humans		SARS coronavirus GDH-BJH01, complete genome	Homo sapiens lung	Homo sapiens	tan2023
JQ765564.1	USA: Denver, CO	Alphacoronavirus	Setracovirus	Human coronavirus NL63	27469	Homo sapiens	Homo	sapiens	Humans	2009-03-01	Human coronavirus NL63 strain NL63/DEN/2009/14, complete genome	nasal pharyngeal wash from a 3 year old male	Homo sapiens; sex: M	tan2023
HQ890536.1	USA: Nashville, TN	Betacoronavirus	Sarbecovirus	Severe acute respiratory syndrome-related coronavirus	29646	Mus musculus	Mus	musculus	Rodents	2008-09-17	SARS coronavirus MA15 ExoN1 isolate d2om3, complete genome		Mus musculus; old	tan2023
KJ473800.1	China	Alphacoronavirus	Minunacovirus	Miniopterus bat coronavirus HKU8	28735	Miniopterus fuliginosus	Miniopterus	fuliginosus	Bats	2013-01-01	BtMf-AlphaCoV/HeN2013, complete genome		Miniopterus fuliginosus	tan2023
HQ890526.1	USA: Nashville, TN	Betacoronavirus	Sarbecovirus	Severe acute respiratory syndrome-related coronavirus	29646	Mus musculus	Mus	musculus	Rodents	2008-10-08	SARS coronavirus MA15 ExoN1 isolate d2ym1, complete genome		Mus musculus; young	tan2023
MN611517.1	Kenya	Alphacoronavirus	Duvinacovirus	Rousettus aegyptiacus bat coronavirus 229E-related	27619	Rousettus aegyptiacus	Rousettus	aegyptiacus	Bats	2018-03-01	Rousettus aegyptiacus bat coronavirus 229E-related isolate 5425, complete genome		Rousettus aegyptiacus	tan2023
EF446615.1		Betacoronavirus	Embecovirus	Betacoronavirus 1	30992	Equus	Equus		Equines		Equine coronavirus strain NC99, complete genome		equine coronavirus strain nc99, complete genome	tan2023
MK303624.1		Betacoronavirus	Embecovirus	Betacoronavirus 1	30664	Homo	Homo		Humans		Human coronavirus OC43 isolate MDS14, complete genome		human coronavirus oc43 isolate mds14, complete genome	tan2023
HQ012369.1	Netherlands	Alphacoronavirus	Tegacovirus	Alphacoronavirus 1	28429	Felinae			Felines	2007-09-11	Feline coronavirus UU21, complete genome		feline	tan2023
KY933090.1		Gammacoronavirus	Igacovirus	Avian coronavirus	27573	Aves			Birds		Avian coronavirus strain L1148, complete genome		avian coronavirus strain l1148, complete genome	tan2023
KF268338.1	USA: Philadelphia	Betacoronavirus	Embecovirus	Murine coronavirus	31294	Mus musculus	Mus	musculus	Rodents	2012-10-25	Murine coronavirus strain MHV/BHKR_lab/USA/icA59_L94P/2012, complete genome		Mus musculus	tan2023
KP981644.1	Italy	Alphacoronavirus	Tegacovirus	Alphacoronavirus 1	29278	Canis lupus	Canis	lupus	Canines	2005-01-01	Canine coronavirus strain CB/05, complete genome	lungs	Canis lupus familiaris (domestic dog)	tan2023
MW532116.1	China	Betacoronavirus	Embecovirus	Betacoronavirus 1	30678	Homo sapiens	Homo	sapiens	Humans	2017-12-01	Human coronavirus OC43 strain OC43/China/06/2017, complete genome	nasopharyngeal swab	Homo sapiens	tan2023
MH310910.1	Saudi Arabia	Betacoronavirus	Merbecovirus	Middle East respiratory syndrome-related coronavirus	30096	Homo sapiens	Homo	sapiens	Humans	2017-06-03	Middle East respiratory syndrome-related coronavirus strain Hu/Riyadh-KSA-7696/2017, complete genome	respiratory secretions	Homo sapiens	tan2023
FJ959407.1	China	Betacoronavirus	Sarbecovirus	Severe acute respiratory syndrome-related coronavirus	29694	palm civet			Civets		SARS coronavirus isolate A001, complete genome		palm civet	tan2023
KY513725.1	China: Jiangsu	Deltacoronavirus	Buldecovirus	Coronavirus HKU15	25422	Sus	Sus		Pigs	2014-01-01	Porcine deltacoronavirus strain CH/Jiangsu/2014, complete genome	fecal sample	pig	tan2023
JF292907.1	USA: Nashville, TN	Betacoronavirus	Sarbecovirus	Severe acute respiratory syndrome-related coronavirus	29646	Mus musculus	Mus	musculus	Rodents	2008-08-10	SARS coronavirus MA15 isolate d2ym2, complete genome		Mus musculus; young	tan2023
KY417149.1	China	Betacoronavirus	Sarbecovirus	Severe acute respiratory syndrome-related coronavirus	29743	Rhinolophus sinicus	Rhinolophus	sinicus	Bats	2013-04-17	Bat SARS-like coronavirus isolate Rs4255, complete genome		Rhinolophus sinicus	tan2023
OL751230.1	USA: California	Betacoronavirus	Sarbecovirus	Severe acute respiratory syndrome-related coronavirus	29811	Homo sapiens	Homo	sapiens	Humans	2021-11-18	Severe acute respiratory syndrome coronavirus 2 isolate SARS-CoV-2/human/USA/CA-CDC-ASC210484865/2021, complete genome	Nasal - Anterior Nares	Homo sapiens	tan2023
KX900399.1	USA: North Carolina	Alphacoronavirus	Tegacovirus	Alphacoronavirus 1	28521	Sus	Sus		Pigs	2007-02-16	Transmissible gastroenteritis virus strain TGEV/USA/NorthCarolina142/2007, complete genome	intestine	transmissible gastroenteritis virus strain tgev/usa/northcarolina142/2007, complete genome	tan2023
LC494156.1	Japan	Betacoronavirus	Embecovirus	Betacoronavirus 1	30942	Bovinae			Bovines	2014-12-01	Bovine coronavirus SHG-3 RNA, complete genome		bovine coronavirus shg-3 rna, complete genome	tan2023
GQ152141.1	Taiwan	Alphacoronavirus	Tegacovirus	Alphacoronavirus 1	28897	Felis	Felis		Felines	2007-09-01	Feline coronavirus strain FCoV/NTU156/P/2007, complete genome	pleural effusion	cat	tan2023
NC_001451.1		Gammacoronavirus	Igacovirus	Avian coronavirus	27608	Aves			Birds		Avian infectious bronchitis virus, complete genome		avian infectious bronchitis virus, complete genome	tan2023
MZ293740.1	Cambodia	Unknown	Unknown	Cynopterus bat coronavirus	29725	Cynopterus	Cynopterus		Bats	2010-12-06	Cynopterus bat coronavirus isolate PREDICT/GCS-264, complete genome	rectal swab	Cynopterus sp.	tan2023
MG977445.1	Cote d'Ivoire	Betacoronavirus	Embecovirus	Betacoronavirus 1	30677	Pan troglodytes	Pan	troglodytes	Primates	2016-12-31	Human coronavirus OC43 isolate TNP F1790_2, complete genome		Pan troglodytes verus	tan2023
FJ938067.1		Betacoronavirus	Embecovirus	Betacoronavirus 1	30953	Homo sapiens	Homo	sapiens	Humans	2009-04-17	Human enteric coronavirus strain 4408, complete genome		Homo sapiens; bovine	tan2023
AY351680.1		Betacoronavirus	Sarbecovirus	Severe acute respiratory syndrome-related coronavirus	29749						SARS coronavirus ZMY 1, complete genome		sars coronavirus zmy 1, complete genome	tan2023
MK062180.1	USA	Betacoronavirus	Sarbecovirus	Severe acute respiratory syndrome-related coronavirus	29727	Homo sapiens	Homo	sapiens	Humans	2017-05-28	SARS coronavirus Urbani isolate icSARS-MA, complete genome		Homo sapiens	tan2023
LC654455.1	Japan: Fukushima	Alphacoronavirus	Setracovirus	Human coronavirus NL63	27516	Homo sapiens	Homo	sapiens	Humans	2018-01-01	Human coronavirus NL63 Fukushima_H219_2018 RNA, complete genome		Homo sapiens	tan2023
KF923894.1	China: Beijing	Betacoronavirus	Embecovirus	Betacoronavirus 1	30713	Homo sapiens	Homo	sapiens	Humans	2007-05-01	Human coronavirus OC43 isolate 5352/2007, complete genome	nasal and throat swab	Homo sapiens	tan2023
ON634365.1	USA: New York	Betacoronavirus	Sarbecovirus	Severe acute respiratory syndrome-related coronavirus	29724	Homo sapiens	Homo	sapiens	Humans	2022-05-10	Severe acute respiratory syndrome coronavirus 2 isolate SARS-CoV-2/human/USA/NY-CDC-QDX36866746/2022, complete genome	Nasal Swabs	Homo sapiens	tan2023
MW246799.1	Italy	Betacoronavirus	Unknown	Betacoronavirus Erinaceus	30826	Erinaceus europaeus	Erinaceus	europaeus	Hedgehogs	2019-01-01	Betacoronavirus Erinaceus isolate ErinaceusCoV/Italy/50265-11/2019, complete genome	feces	Erinaceus europaeus	tan2023
KT368906.1	Saudi Arabia	Alphacoronavirus	Duvinacovirus	Human coronavirus 229E	27395	Camelus	Camelus		Camelids	2014-12-01	Camel alphacoronavirus isolate camel/Jeddah/D50(a)/2014, complete genome		camel	tan2023
OL410607.1	USA: South Dakota	Alphacoronavirus	Unknown	Eptesicus bat coronavirus	28486	Eptesicus fuscus	Eptesicus	fuscus	Bats	2020-07-30	Eptesicus bat coronavirus strain 15712, complete genome		Eptesicus fuscus	tan2023
MF769416.1	China	Alphacoronavirus	Rhinacovirus	Swine acute diarrhea syndrome coronavirus	27173	Sus	Sus		Pigs	2017-01-01	Swine acute diarrhea syndrome coronavirus isolate 57, complete genome		swine	tan2023
KY996417.1	USA	Alphacoronavirus	Duvinacovirus	Human coronavirus 229E	27270	Homo	Homo		Humans	2016-11-23	Human coronavirus 229E strain 229E/UF-1/2016, complete genome	environmental surface	human coronavirus 229e strain 229e/uf-1/2016, complete genome	tan2023
MZ293734.1	Cambodia	Unknown	Unknown	Myotis bat coronavirus	28320	Myotis horsfieldii	Myotis	horsfieldii	Bats	2011-06-22	Myotis bat coronavirus isolate PREDICT/GCS-011, complete genome	rectal swab	Myotis horsfieldii	tan2023
KY363867.1	China	Deltacoronavirus	Buldecovirus	Coronavirus HKU15	25396	Sus	Sus		Pigs	2016-03-18	Porcine deltacoronavirus isolate CHN-GD16-03, complete genome		swine	tan2023
LC494186.1	Japan	Betacoronavirus	Embecovirus	Betacoronavirus 1	30942	Bovinae			Bovines	2017-12-01	Bovine coronavirus TCG-27 RNA, complete genome		bovine coronavirus tcg-27 rna, complete genome	tan2023
KF923907.1	China: Beijing	Betacoronavirus	Embecovirus	Betacoronavirus 1	30713	Homo sapiens	Homo	sapiens	Humans	2007-05-01	Human coronavirus OC43 isolate 5370/2007, complete genome	nasal and throat swab	Homo sapiens	tan2023
MW351623.1	China	Gammacoronavirus	Igacovirus	Avian coronavirus	27692	Aves			Birds	2019-01-01	Avian coronavirus isolate IBV-rSD, complete genome		chicken	tan2023
MZ081391.1	China	Alphacoronavirus	Unknown	Alphacoronavirus sp.	28498	Rhinolophus malayanus	Rhinolophus	malayanus	Bats	2020-07-14	Alphacoronavirus sp. strain bat/Yunnan/RmYN22/2020, complete genome	bat feces	Rhinolophus malayanus	tan2023
LC494179.1	Japan	Betacoronavirus	Embecovirus	Betacoronavirus 1	30936	Bovinae			Bovines	2016-12-01	Bovine coronavirus TCG-20 RNA, complete genome		bovine coronavirus tcg-20 rna, complete genome	tan2023
HQ462571.1	China	Alphacoronavirus	Tegacovirus	Alphacoronavirus 1	28597	Sus scrofa	Sus	scrofa	Pigs		Transmissible gastroenteritis virus strain WH-1, complete genome		Sus scrofa	tan2023
DQ415909.1	China: Hong Kong	Betacoronavirus	Embecovirus	Human coronavirus HKU1	29767	Homo	Homo		Humans		Human coronavirus HKU1 strain N13 genotype A, complete genome	nasopharyngeal aspirates of patients diagnosed respiratory tract infection diseases	human coronavirus hku1 strain n13 genotype a, complete genome	tan2023
NC_001846.1		Betacoronavirus	Embecovirus	Murine coronavirus	31357	Murinae			Rodents		Murine hepatitis virus strain MHV-A59 C12 mutant, complete genome		murine hepatitis virus strain mhv-a59 c12 mutant, complete genome	tan2023
MH052683.1	South Korea	Alphacoronavirus	Pedacovirus	Porcine epidemic diarrhea virus	28038	Sus	Sus		Pigs	2017-11-01	Porcine epidemic diarrhea virus isolate KNU-1704, complete genome		pig	tan2023
MG428701.1	Kenya	Alphacoronavirus	Setracovirus	Human coronavirus NL63	27623	Homo sapiens	Homo	sapiens	Humans	2010-06-04	Human coronavirus NL63 isolate Kilifi_HH_0512_04-Jun-2010, complete genome		Homo sapiens	tan2023
KY073744.1	Kenya	Alphacoronavirus	Setracovirus	NL63-related bat coronavirus strain BtKYNL63-9b	28363	Triaenops afer	Triaenops	afer	Bats	2010-06-21	NL63-related bat coronavirus strain BtKYNL63-9a, complete genome	fecal swab	Triaenops afer	tan2023
KY406735.1	USA	Alphacoronavirus	Tegacovirus	Alphacoronavirus 1	27779	Sus	Sus		Pigs	2016-11-01	Porcine respiratory coronavirus strain PRCV/USA/Minnesota-46140/2016, complete genome	nasal swab	porcine respiratory coronavirus strain prcv/usa/minnesota-46140/2016, complete genome	tan2023
NC_016993.1	China: Hong Kong	Deltacoronavirus	Buldecovirus	Magpie-robin coronavirus HKU18	26689	Aves			Birds	2007-01-01	Magpie-robin coronavirus HKU18, complete genome		magpie-robin	tan2023
KY967361.1	USA	Betacoronavirus	Embecovirus	Betacoronavirus 1	30661	Homo sapiens	Homo	sapiens	Humans	2015-01-01	Human coronavirus OC43 strain HCoV_OC43/Seattle/USA/SC2345/2015, complete genome		Homo sapiens	tan2023
MF598692.1	United Arab Emirates	Betacoronavirus	Merbecovirus	Middle East respiratory syndrome-related coronavirus	30123	Camelus dromedarius	Camelus	dromedarius	Camelids	2015-03-01	Middle East respiratory syndrome-related coronavirus strain camel/UAE_B105_2015, complete genome	nasopharyngeal swab	Camelus dromedarius	tan2023
MN535731.1	Denmark: Moensted	Unknown	Unknown	Bat coronavirus	28096	Myotis daubentonii	Myotis	daubentonii	Bats	2014-10-01	MAG: Bat coronavirus isolate BtCoV/13585-35/M.dau/DK/2014, complete genome	feces	Myotis daubentonii	tan2023
LT545990.1		Alphacoronavirus	Tegacovirus	Alphacoronavirus 1	28050						Swine enteric coronavirus isolate SeCoV_GER_L00930_2012 genome assembly, complete genome: monopartite		swine enteric coronavirus isolate secov_ger_l00930_2012 genome assembly, complete genome: monopartite	tan2023
KF923896.1	China: Beijing	Betacoronavirus	Embecovirus	Betacoronavirus 1	30737	Homo sapiens	Homo	sapiens	Humans	2012-02-01	Human coronavirus OC43 isolate 3074A/2012, complete genome	nasopharyngeal aspirate	Homo sapiens	tan2023
JQ989273.1	Hong Kong	Alphacoronavirus	Decacovirus	Bat coronavirus HKU10	28483	Chiroptera			Bats	2010-08-01	Hipposideros bat coronavirus HKU10 isolate TLC1347A, complete genome		bat	tan2023
OK017821.1	China: Guangdong	Betacoronavirus	Sarbecovirus	Sarbecovirus sp.	29550	Rhinolophus sinicus	Rhinolophus	sinicus	Bats	2017-09-01	Sarbecovirus sp. isolate GD2017O, complete genome		Rhinolophus sinicus	tan2023
FJ938065.1	USA: Ohio	Betacoronavirus	Embecovirus	Betacoronavirus 1	30969	Bovinae			Bovines	2000-01-01	Bovine respiratory coronavirus AH187, complete genome		bovine	tan2023
MG557844.1	China	Alphacoronavirus	Rhinacovirus	Swine acute diarrhea syndrome coronavirus	27163	Sus	Sus		Pigs	2017-04-01	Swine acute diarrhea syndrome coronavirus isolate SADS-CoV/CN/GDWT/2017, complete genome		swine	tan2023
OM159554.1	USA: Texas	Betacoronavirus	Sarbecovirus	Severe acute respiratory syndrome-related coronavirus	29890	Homo sapiens	Homo	sapiens	Humans	2021-12-19	Severe acute respiratory syndrome coronavirus 2 isolate SARS-CoV-2/human/USA/TX-CDC-STM-SZU5FDH9D/2021, complete genome	nasal swab	Homo sapiens	tan2023
JQ408981.1		Alphacoronavirus	Tegacovirus	Alphacoronavirus 1	29025	Felis catus	Felis	catus	Felines		Feline infectious peritonitis virus strain DF-2, complete genome		Felis catus	tan2023
JQ765570.1	USA: Denver, CO	Alphacoronavirus	Setracovirus	Human coronavirus NL63	27469	Homo sapiens	Homo	sapiens	Humans	2005-01-19	Human coronavirus NL63 strain NL63/DEN/2005/235, complete genome	nasal pharyngeal wash from a 5 month old male	Homo sapiens; sex: M	tan2023
OL770287.1	Australia	Betacoronavirus	Embecovirus	Betacoronavirus 1	30665	Homo sapiens	Homo	sapiens	Humans	2019-01-01	Human coronavirus OC43 isolate HCoV-OC43/03-16118/NSW/AU/2019, complete genome	nasopharyngeal aspirate samples	Homo sapiens	tan2023
NC_010437.1	Hong Kong	Alphacoronavirus	Minunacovirus	Miniopterus bat coronavirus 1	28326	Chiroptera			Bats		Bat coronavirus 1A, complete genome		bat coronavirus 1a, complete genome	tan2023
AY390556.1	China: Guangzhou	Betacoronavirus	Sarbecovirus	Severe acute respiratory syndrome-related coronavirus	29760						SARS coronavirus GZ02, complete genome		sars coronavirus gz02, complete genome	tan2023
HQ012371.1	Netherlands	Alphacoronavirus	Tegacovirus	Alphacoronavirus 1	29274	Felinae			Felines	2008-01-25	Feline coronavirus UU31, complete genome		feline	tan2023
KP209311.1	United Arab Emirates	Betacoronavirus	Merbecovirus	Middle East respiratory syndrome-related coronavirus	30123	Homo sapiens	Homo	sapiens	Humans	2014-04-17	Middle East respiratory syndrome coronavirus strain Abu Dhabi_UAE_33_2014, complete genome	sputum	Homo sapiens	tan2023
KP198611.1	China: Beijing	Betacoronavirus	Embecovirus	Betacoronavirus 1	30752	Homo sapiens	Homo	sapiens	Humans	2010-01-01	Human coronavirus OC43 strain 1783A/10, complete genome	nasopharyngeal aspirates	Homo sapiens	tan2023
JN129834.1	China: Hong Kong	Betacoronavirus	Embecovirus	Betacoronavirus 1	30710	Homo sapiens	Homo	sapiens	Humans	2004-11-01	Human coronavirus OC43 strain HK04-01, complete genome		Homo sapiens	tan2023
LC494131.1	Japan	Betacoronavirus	Embecovirus	Betacoronavirus 1	30955	Bovinae			Bovines	2011-06-01	Bovine coronavirus IWT-3 RNA, complete genome		bovine coronavirus iwt-3 rna, complete genome	tan2023
KP143512.1	United Kingdom	Alphacoronavirus	Tegacovirus	Alphacoronavirus 1	28956	Felis catus	Felis	catus	Felines	2013-01-01	Feline coronavirus isolate 26M, complete genome		Felis catus	tan2023
KF923901.1	China: Beijing	Betacoronavirus	Embecovirus	Betacoronavirus 1	30713	Homo sapiens	Homo	sapiens	Humans	2007-06-01	Human coronavirus OC43 isolate 5472/2007, complete genome	nasal and throat swab	Homo sapiens	tan2023
MK982928.1	Australia	Gammacoronavirus	Igacovirus	Avian coronavirus	27901	Gallus gallus	Gallus	gallus	Birds	1999-01-01	Infectious bronchitis virus strain Ck/Aus/Q4/99, complete genome	allantoic fluid	Gallus gallus	tan2023
KU297956.1	Slovenia	Alphacoronavirus	Pedacovirus	Porcine epidemic diarrhea virus	28028	Sus scrofa	Sus	scrofa	Pigs	2015-09-03	Porcine epidemic diarrhea virus strain SLO/JH-11/2015, complete genome	diarrheic feces	Sus scrofa	tan2023
KT381875.1	USA	Alphacoronavirus	Setracovirus	Human coronavirus NL63	27553	Homo sapiens	Homo	sapiens	Humans	2015-01-01	Human coronavirus NL63 isolate NL63/UF-1/2015, complete genome	nasopharyngeal swab	Homo sapiens	tan2023
KX900408.1	USA: Wisconsin	Alphacoronavirus	Tegacovirus	Alphacoronavirus 1	28521	Sus	Sus		Pigs	2014-01-17	Transmissible gastroenteritis virus strain TGEV/USA/Wisconsin151/2014, complete genome	feces	transmissible gastroenteritis virus strain tgev/usa/wisconsin151/2014, complete genome	tan2023
LT898420.1		Alphacoronavirus	Pedacovirus	Porcine epidemic diarrhea virus	28029	Sus	Sus		Pigs		Porcine epidemic diarrhea virus isolate PEDV_GER_L01014-K01_15-04_2015 genome assembly, complete genome: monopartite		porcine epidemic diarrhea virus isolate pedv_ger_l01014-k01_15-04_2015 genome assembly, complete genome: monopartite	tan2023
KT806055.1	Saudi Arabia	Betacoronavirus	Merbecovirus	Middle East respiratory syndrome-related coronavirus	30096	Homo sapiens	Homo	sapiens	Humans	2015-02-10	Middle East respiratory syndrome coronavirus isolate Hu/Jeddah-KSA-C20860/2015, complete genome	respiratory secretions	Homo sapiens	tan2023
KF923917.1	China: Beijing	Betacoronavirus	Embecovirus	Betacoronavirus 1	30713	Homo sapiens	Homo	sapiens	Humans	2007-06-01	Human coronavirus OC43 isolate 5566/2007, complete genome	nasal and throat swab	Homo sapiens	tan2023
NC_016995.1	China: Hong Kong	Deltacoronavirus	Andecovirus	Wigeon coronavirus HKU20	26227	Anatidae			Birds	2008-01-01	Wigeon coronavirus HKU20, complete genome		wigeon	tan2023
MZ081395.1	China	Alphacoronavirus	Unknown	Alphacoronavirus sp.	28690	Rhinolophus stheno	Rhinolophus	stheno	Bats	2020-04-18	Alphacoronavirus sp. strain bat/Yunnan/RsYN14/2020, complete genome	bat feces	Rhinolophus stheno	tan2023
MZ081397.1	China	Alphacoronavirus	Unknown	Alphacoronavirus sp.	28061	Myotis laniger	Myotis	laniger	Bats	2020-06-03	Alphacoronavirus sp. strain bat/Yunnan/MlYN20/2020, complete genome	bat feces	Myotis laniger	tan2023
AY559081.1	Singapore	Betacoronavirus	Sarbecovirus	Severe acute respiratory syndrome-related coronavirus	29716						SARS coronavirus Sin842, complete genome		sars coronavirus sin842, complete genome	tan2023
OK017825.1	China: Guangdong	Betacoronavirus	Sarbecovirus	Sarbecovirus sp.	29551	Rhinolophus sinicus	Rhinolophus	sinicus	Bats	2019-08-01	Sarbecovirus sp. isolate GD2019A, complete genome		Rhinolophus sinicus	tan2023
MF769433.1	China	Alphacoronavirus	Rhinacovirus	Swine acute diarrhea syndrome coronavirus	27173	Sus	Sus		Pigs	2017-01-01	Swine acute diarrhea syndrome coronavirus isolate 44, complete genome		swine	tan2023
KP887098.1	USA	Betacoronavirus	Embecovirus	Murine coronavirus	31409	Murinae			Rodents	2014-07-01	UNVERIFIED: Murine coronavirus strain AM2, complete genome		unverified: murine coronavirus strain am2, complete genome	tan2023
MZ293750.1	Bangladesh	Unknown	Unknown	Megaderma bat coronavirus	27273	Megaderma lyra	Megaderma	lyra	Bats	2012-12-22	Megaderma bat coronavirus isolate SBB-122, complete genome	rectal swab	Megaderma lyra	tan2023
OK391228.1	China	Betacoronavirus	Embecovirus	Betacoronavirus 1	30400	Homo sapiens	Homo	sapiens	Humans	2021-02-01	UNVERIFIED: Human coronavirus OC43 strain OC43/China/P21/2021, complete genome	nasopharyngeal swab	Homo sapiens	tan2023
KY770859.1	China	Betacoronavirus	Sarbecovirus	Sarbecovirus sp.	29667	Rhinolophus sinicus	Rhinolophus	sinicus	Bats	2013-01-01	Sarbecovirus sp. isolate Anlong-112, complete genome		Rhinolophus sinicus	tan2023
MT199591.1	China	Alphacoronavirus	Rhinacovirus	Swine acute diarrhea syndrome coronavirus	27162	Sus	Sus		Pigs	2016-04-08	Swine acute diarrhea syndrome coronavirus isolate SADS-CoV/GDGL01/2016, complete genome		swine	tan2023
AC_000192.1		Betacoronavirus	Embecovirus	Murine coronavirus	31526	Murinae			Rodents		Murine hepatitis virus strain JHM, complete genome		murine hepatitis virus strain jhm, complete genome	tan2023
EF424621.1	USA:Ohio	Betacoronavirus	Embecovirus	Betacoronavirus 1	30995	Bovidae			Bovids		Sable antelope coronavirus US/OH1/2003, complete genome		antelope	tan2023
JF292902.1	USA: Nashville, TN	Betacoronavirus	Sarbecovirus	Severe acute respiratory syndrome-related coronavirus	29646	Mus musculus	Mus	musculus	Rodents	2008-10-10	SARS coronavirus MA15 ExoN1 isolate d4ym4, complete genome		Mus musculus; young	tan2023
LC119077.1	Japan	Alphacoronavirus	Minacovirus	Ferret coronavirus	28550					2013-05-22	Ferret coronavirus genomic RNA, complete genome, strain: FRCoV4370		ferret coronavirus genomic rna, complete genome, strain: frcov4370	tan2023
EU371563.1		Betacoronavirus	Sarbecovirus	Severe acute respiratory syndrome-related coronavirus	29602						SARS coronavirus BJ182-8, complete genome		sars coronavirus bj182-8, complete genome	tan2023
MN025260.1	China: Guangxi	Deltacoronavirus	Buldecovirus	Coronavirus HKU15	25399	Sus	Sus		Pigs	2017-01-18	Porcine deltacoronavirus, complete genome	intestinal content	porcine	tan2023
MK572803.1	China: Sichuan	Deltacoronavirus	Buldecovirus	Coronavirus HKU15	25403	Sus scrofa	Sus	scrofa	Pigs	2017-06-01	Porcine deltacoronavirus strain SCNC201705, complete genome	feces	Sus scrofa	tan2023
MZ328294.1	China	Betacoronavirus	Unknown	Jingmen Rhinolophus sinicus betacoronavirus 1	29627	Rhinolophus sinicus	Rhinolophus	sinicus	Bats	2016-01-01	Jingmen Rhinolophus sinicus betacoronavirus 1, complete genome		Rhinolophus sinicus	tan2023
DQ648856.1		Betacoronavirus	Sarbecovirus	Severe acute respiratory syndrome-related coronavirus	29704	Chiroptera			Bats		Bat coronavirus (BtCoV/273/2005), complete genome		bat coronavirus (btcov/273/2005), complete genome	tan2023
KY369913.1	USA	Alphacoronavirus	Duvinacovirus	Human coronavirus 229E	27238	Homo sapiens	Homo	sapiens	Humans	2016-01-01	Human coronavirus 229E strain HCoV_229E/Seattle/USA/SC1073/2016, complete genome		Homo sapiens	tan2023
MH938448.1	Italy	Alphacoronavirus	Nyctacovirus	Alphacoronavirus Bat-CoV/P.kuhlii/Italy/206645-41/2011	27862	Pipistrellus kuhlii	Pipistrellus	kuhlii	Bats	2011-01-01	Alphacoronavirus Bat-CoV/P.kuhlii/Italy/206645-41/2011, complete genome	carcass	Pipistrellus kuhlii	tan2023
LC654449.1	Japan: Fukushima	Betacoronavirus	Embecovirus	Human coronavirus HKU1	29897	Homo sapiens	Homo	sapiens	Humans	2020-01-01	Human coronavirus HKU1 Fukushima_O943_2020 RNA, complete genome		Homo sapiens	tan2023
KR265862.1	USA: Ohio	Deltacoronavirus	Buldecovirus	Coronavirus HKU15	25394	Sus	Sus		Pigs	2014-03-26	Porcine deltacoronavirus strain USA/Ohio444/2014, complete genome		pig	tan2023
AY572034.1	China: Southern China	Betacoronavirus	Sarbecovirus	Severe acute respiratory syndrome-related coronavirus	29540	civet			Civets		SARS coronavirus civet007, complete genome	rectal swab	civet	tan2023
KY799179.1	Canada	Alphacoronavirus	Colacovirus	Bat coronavirus CDPHE15	28173	Myotis lucifugus	Myotis	lucifugus	Bats	2010-11-01	Myotis lucifugus coronavirus, complete genome		Myotis lucifugus (little brown bat)	tan2023
ON325309.1	Switzerland	Alphacoronavirus	Unknown	Bat alphacoronavirus	27932	Myotis myotis	Myotis	myotis	Bats	2019-01-01	Bat alphacoronavirus isolate BatCoV/M.myotis/Switzerland/2019, complete genome	ground stool samples of 500 Myotis myotis	Myotis myotis	tan2023
MZ081384.1	China	Alphacoronavirus	Unknown	Alphacoronavirus sp.	29203	Hipposideros cineraceus	Hipposideros	cineraceus	Bats	2020-07-29	Alphacoronavirus sp. strain bat/Yunnan/HcYN26/2020, complete genome	bat feces	Hipposideros cineraceus	tan2023
MW356787.1	China	Unknown	Unknown	raccoon dog coronavirus	29305	Nyctereutes procyonoides	Nyctereutes	procyonoides	Canines	2019-01-01	UNVERIFIED: Raccoon dog coronavirus strain HBLT, complete genome	fece	Nyctereutes procyonoides	tan2023
EU095850.1	Canada	Gammacoronavirus	Igacovirus	Avian coronavirus	27657	Aves			Birds		Turkey coronavirus isolate MG10, complete genome		turkey	tan2023
FJ882932.1	USA: Tennessee	Betacoronavirus	Sarbecovirus	Severe acute respiratory syndrome-related coronavirus	29646					2008-03-28	SARS coronavirus wtic-MB isolate P3pp14, complete genome		sars coronavirus wtic-mb isolate p3pp14, complete genome	tan2023
AY559085.1	Singapore	Betacoronavirus	Sarbecovirus	Severe acute respiratory syndrome-related coronavirus	29713						SARS coronavirus Sin848, complete genome		sars coronavirus sin848, complete genome	tan2023
MT984599.1	Greece	Gammacoronavirus	Igacovirus	Avian coronavirus	27787	Gallus gallus	Gallus	gallus	Birds	2013-01-01	Avian coronavirus strain D2220/2/2013/GR, complete genome		Gallus gallus	tan2023
MW030109.1	USA	Alphacoronavirus	Tegacovirus	Alphacoronavirus 1	29332	Felis catus	Felis	catus	Felines	2018-05-01	Feline coronavirus isolate 79-1146_CA, complete genome		Felis catus	tan2023
FJ882946.1	USA: Tennessee	Betacoronavirus	Sarbecovirus	Severe acute respiratory syndrome-related coronavirus	29647					2008-03-28	SARS coronavirus wtic-MB isolate P3pp13, complete genome		sars coronavirus wtic-mb isolate p3pp13, complete genome	tan2023
MG977449.1	Cote d'Ivoire	Betacoronavirus	Embecovirus	Betacoronavirus 1	30721	Pan troglodytes	Pan	troglodytes	Primates	2016-12-28	Human coronavirus OC43 isolate TNP F1834_2, complete genome		Pan troglodytes verus	tan2023
KJ473810.1	China	Alphacoronavirus	Decacovirus	Rhinolophus ferrumequinum alphacoronavirus HuB-2013	27576	Myotis	Myotis		Bats	2013-01-01	BtMs-AlphaCoV/GS2013, complete genome		Myotis sp.	tan2023
OK017837.1	China: Jiangxi	Betacoronavirus	Sarbecovirus	Sarbecovirus sp.	29550	Rhinolophus sinicus	Rhinolophus	sinicus	Bats	2021-07-01	Sarbecovirus sp. isolate JX2021C, complete genome		Rhinolophus sinicus	tan2023
KM454473.1	China	Gammacoronavirus	Igacovirus	Duck coronavirus 2714	27754	Anatidae			Birds	2014-01-01	Duck coronavirus DK/GD/27/2014, complete genome		duck	tan2023
MG242062.1	China	Deltacoronavirus	Buldecovirus	Coronavirus HKU15	25414	Sus scrofa	Sus	scrofa	Pigs	2017-01-01	Porcine deltacoronavirus isolate CHN-HeB1-2017, complete genome		Sus scrofa	tan2023
DQ415904.1	China: Hong Kong	Betacoronavirus	Embecovirus	Human coronavirus HKU1	29295	Homo	Homo		Humans		Human coronavirus HKU1 strain N6 genotype A, complete genome	nasopharyngeal aspirates of patients diagnosed respiratory tract infection diseases	human coronavirus hku1 strain n6 genotype a, complete genome	tan2023
MN249445.1	China	Deltacoronavirus	Buldecovirus	Coronavirus HKU15	25424	Sus scrofa	Sus	scrofa	Pigs	2017-12-11	Porcine deltacoronavirus isolate CHN-JS-2017, complete genome	feces	Sus scrofa	tan2023
KY352407.1	Kenya	Betacoronavirus	Sarbecovirus	Severe acute respiratory syndrome-related coronavirus	29274	Rhinolophus	Rhinolophus		Bats	2007-08-01	Severe acute respiratory syndrome-related coronavirus strain BtKY72, complete genome	fecal swab	Rhinolophus sp. (bat)	tan2023
GQ153541.1		Betacoronavirus	Sarbecovirus	Severe acute respiratory syndrome-related coronavirus	29704	Chiroptera			Bats		Bat SARS coronavirus HKU3-6, complete genome		bat sars coronavirus hku3-6, complete genome	tan2023
JQ765571.1	USA: Denver, CO	Alphacoronavirus	Setracovirus	Human coronavirus NL63	27487	Homo sapiens	Homo	sapiens	Humans	2005-01-23	Human coronavirus NL63 strain NL63/DEN/2005/271, complete genome	nasal pharyngeal wash from a 2 year old female	Homo sapiens; sex: F	tan2023
MN200481.1	China: Shandong	Deltacoronavirus	Buldecovirus	Coronavirus HKU15	25410	Sus	Sus		Pigs	2018-01-01	Coronavirus HKU15 isolate SD2018/300, complete genome		swine	tan2023
KX998969.1	Viet Nam: Southern	Deltacoronavirus	Buldecovirus	Coronavirus HKU15	25415	Sus	Sus		Pigs	2015-12-01	Porcine deltacoronavirus isolate P29_15_VN_1215, complete genome		pig	tan2023
KP118885.1	China	Gammacoronavirus	Igacovirus	Avian coronavirus	27618	Gallus gallus	Gallus	gallus	Birds	2011-01-01	Infectious bronchitis virus strain ck/CH/LSD/110857, complete genome		Gallus gallus	tan2023
EU371564.1		Betacoronavirus	Sarbecovirus	Severe acute respiratory syndrome-related coronavirus	29512						SARS coronavirus BJ182-12, complete genome		sars coronavirus bj182-12, complete genome	tan2023
AY613947.1	China	Betacoronavirus	Sarbecovirus	Severe acute respiratory syndrome-related coronavirus	29730						SARS coronavirus GZ0402, complete genome		sars coronavirus gz0402, complete genome	tan2023
MH687934.1	Viet Nam	Alphacoronavirus	Unknown	Alphacoronavirus sp.	28249	Scotophilus kuhlii	Scotophilus	kuhlii	Bats	2014-06-11	Alphacoronavirus sp. strain VZ_AlphaCoV_16715_23, complete genome		Scotophilus kuhlii	tan2023
MZ328298.1	China	Alphacoronavirus	Unknown	Jingmen Myotis chinensis alphacoronavirus 1	27914	Myotis chinensis	Myotis	chinensis	Bats	2016-01-01	Jingmen Myotis chinensis alphacoronavirus 1, complete genome		Myotis chinensis	tan2023
KJ601779.1	USA: Illinois	Deltacoronavirus	Buldecovirus	Coronavirus HKU15	25404	Sus	Sus		Pigs	2014-01-11	Deltacoronavirus PDCoV/USA/Illinois136/2014 from USA, complete genome		swine	tan2023
OK017813.1	China: Guangdong	Betacoronavirus	Sarbecovirus	Sarbecovirus sp.	29537	Rhinolophus sinicus	Rhinolophus	sinicus	Bats	2017-09-01	Sarbecovirus sp. isolate GD2017G, complete genome		Rhinolophus sinicus	tan2023
JF292916.1	USA: Nashville, TN	Betacoronavirus	Sarbecovirus	Severe acute respiratory syndrome-related coronavirus	29646	Mus musculus	Mus	musculus	Rodents	2008-09-19	SARS coronavirus MA15 isolate d3om1, complete genome		Mus musculus; old	tan2023
KX900395.1	USA: Minnesota	Alphacoronavirus	Tegacovirus	Alphacoronavirus 1	28521	Sus	Sus		Pigs	2006-11-08	Transmissible gastroenteritis virus strain TGEV/USA/Minnesota138/2006, complete genome	intestine	transmissible gastroenteritis virus strain tgev/usa/minnesota138/2006, complete genome	tan2023
KF923920.1	China: Beijing	Betacoronavirus	Embecovirus	Betacoronavirus 1	30713	Homo sapiens	Homo	sapiens	Humans	2007-07-01	Human coronavirus OC43 isolate 5617/2007, complete genome	nasal and throat swab	Homo sapiens	tan2023
OK017834.1	China: Hunan	Betacoronavirus	Sarbecovirus	Sarbecovirus sp.	29528	Rhinolophus sinicus	Rhinolophus	sinicus	Bats	2021-03-01	Sarbecovirus sp. isolate HN2021E, complete genome		Rhinolophus sinicus	tan2023
JN183883.1	Netherlands: Utrecht	Alphacoronavirus	Tegacovirus	Alphacoronavirus 1	29222	Felis catus	Felis	catus	Felines	2010-03-12	Feline coronavirus UU54, complete genome		Felis catus	tan2023
KF514410.1	USA: Nashville, TN	Betacoronavirus	Sarbecovirus	Severe acute respiratory syndrome-related coronavirus	29687					2009-07-08	SARS coronavirus ExoN1 strain SARS/VeroE6_lab/USA/ExoN1_c8P20/2009, complete genome		sars coronavirus exon1 strain sars/veroe6_lab/usa/exon1_c8p20/2009, complete genome	tan2023
AY338174.1		Betacoronavirus	Sarbecovirus	Severe acute respiratory syndrome-related coronavirus	29573						SARS coronavirus Taiwan TC1, complete genome		sars coronavirus taiwan tc1, complete genome	tan2023
AY394850.2		Betacoronavirus	Sarbecovirus	Severe acute respiratory syndrome-related coronavirus	29728						SARS coronavirus WHU, complete genome		sars coronavirus whu, complete genome	tan2023
FJ882958.1	USA: Tennessee	Betacoronavirus	Sarbecovirus	Severe acute respiratory syndrome-related coronavirus	29720					2008-11-25	SARS coronavirus MA15 isolate P3pp7, complete genome		sars coronavirus ma15 isolate p3pp7, complete genome	tan2023
KX442564.1	China	Betacoronavirus	Merbecovirus	Hypsugo bat coronavirus HKU25	30498	Hypsugo pulveratus	Hypsugo	pulveratus	Bats	2013-09-14	Hypsugo bat coronavirus HKU25 isolate YD131305, complete genome	anal swab	Hypsugo pulveratus	tan2023
KP757890.1	China	Deltacoronavirus	Buldecovirus	Coronavirus HKU15	25420	Sus	Sus		Pigs	2004-05-24	Porcine deltacoronavirus isolate CHN-AH-2004, complete genome	pig intestines	pig	tan2023
MZ293756.1	Bangladesh	Betacoronavirus	Nobecovirus	Rousettus bat coronavirus GCCDC1	29090	Rousettus leschenaultii	Rousettus	leschenaultii	Bats	2012-08-27	Rousettus bat coronavirus isolate SBB-943, complete genome	mixed feces and urine	Rousettus leschenaultii	tan2023
KF530060.1	USA: Nashville, TN	Betacoronavirus	Embecovirus	Betacoronavirus 1	30577	Homo sapiens	Homo	sapiens	Humans	1985-01-08	Human coronavirus OC43 strain OC43/human/USA/851-15/1985, complete genome		Homo sapiens; sex: M; age: 15Y	tan2023
KF530106.1	USA: Nashville, TN	Alphacoronavirus	Setracovirus	Human coronavirus NL63	27401	Homo sapiens	Homo	sapiens	Humans	1987-12-16	Human coronavirus NL63 strain NL63/human/USA/8712-17/1987, complete genome		Homo sapiens; sex: M; age: 35Y	tan2023
ON325307.1	Switzerland	Betacoronavirus	Merbecovirus	Middle East respiratory syndrome-related coronavirus	30047	Vespertilio murinus	Vespertilio	murinus	Bats	2020-01-01	Middle East respiratory syndrome-related coronavirus isolate BatCoV/V.murinus/Switzerland/2020, complete genome	ground stool samples of 200 Vespertilio murinus	Vespertilio murinus	tan2023
MH687968.1	Viet Nam	Betacoronavirus	Unknown	Betacoronavirus sp.	31083	Rattus argentiventer	Rattus	argentiventer	Rodents	2014-11-14	Betacoronavirus sp. strain VZ_BetaCoV_16715_52, complete genome		Rattus argentiventer	tan2023
KP790143.1	China	Gammacoronavirus	Igacovirus	Avian coronavirus	27712	Gallus gallus	Gallus	gallus	Birds	2014-01-01	Infectious bronchitis virus strain CK/CH/LDL/140520, complete genome		Gallus gallus	tan2023
MW218395.1	Hong Kong	Betacoronavirus	Merbecovirus	Tylonycteris bat coronavirus HKU4	30248	Tylonycteris pachypus	Tylonycteris	pachypus	Bats	2010-08-16	Tylonycteris bat coronavirus HKU4 isolate SM3A, complete genome		Tylonycteris pachypus	tan2023
AF391541.1		Betacoronavirus	Embecovirus	Betacoronavirus 1	31028	Bovinae			Bovines		Bovine coronavirus isolate BCoV-ENT, complete genome		bovine coronavirus isolate bcov-ent, complete genome	tan2023
KF514400.1	USA: Nashville, TN	Betacoronavirus	Sarbecovirus	Severe acute respiratory syndrome-related coronavirus	29687					2010-10-01	SARS coronavirus wtic-MB strain SARS/VeroE6_lab/USA/WTic_c1.8P20/2010, complete genome		sars coronavirus wtic-mb strain sars/veroe6_lab/usa/wtic_c1.8p20/2010, complete genome	tan2023
MZ293751.1	Bangladesh	Unknown	Unknown	Megaderma bat coronavirus	27288	Megaderma lyra	Megaderma	lyra	Bats	2013-05-21	Megaderma bat coronavirus isolate SBB-130, complete genome	rectal swab	Megaderma lyra	tan2023
EF424624.1	USA:Ohio	Betacoronavirus	Embecovirus	Betacoronavirus 1	30979	Giraffa	Giraffa		Giraffids		Calf-giraffe coronavirus US/OH3/2006, complete genome		giraffe	tan2023
MK032178.1	China	Gammacoronavirus	Igacovirus	Avian coronavirus	27688	Gallus	Gallus		Birds	2017-01-01	Infectious bronchitis virus strain gammaCoV/ck/China/I0718/17, complete genome		Gallus	tan2023
MT984588.1	Hungary	Gammacoronavirus	Igacovirus	Avian coronavirus	27631	Gallus gallus	Gallus	gallus	Birds	2011-01-01	Avian coronavirus strain D1561/8/2011/HU, complete genome		Gallus gallus	tan2023
KY019623.1	Slovenia	Alphacoronavirus	Pedacovirus	Porcine epidemic diarrhea virus	28021	Sus	Sus		Pigs	2015-11-03	Porcine epidemic diarrhea virus isolate SLOreBAS-1/2015, complete genome		pig	tan2023
KX538968.1	Malaysia: Kuala Lumpur	Betacoronavirus	Embecovirus	Betacoronavirus 1	30716	Homo sapiens	Homo	sapiens	Humans	2012-05-09	Human coronavirus OC43 isolate MY-U464/12, complete genome	nasopharyngeal swab	Homo sapiens	tan2023
MK062181.1	USA	Betacoronavirus	Sarbecovirus	Severe acute respiratory syndrome-related coronavirus	29727	Homo sapiens	Homo	sapiens	Humans	2017-05-29	SARS coronavirus Urbani isolate icSARS-C3, complete genome		Homo sapiens	tan2023
KF600630.1	Saudi Arabia	Betacoronavirus	Merbecovirus	Middle East respiratory syndrome-related coronavirus	30081	Homo sapiens	Homo	sapiens	Humans	2013-05-13	Middle East respiratory syndrome coronavirus isolate Buraidah_1_2013, complete genome		Homo sapiens	tan2023
LC687398.1	Japan: Fukushima	Betacoronavirus	Embecovirus	Betacoronavirus 1	30673	Homo sapiens	Homo	sapiens	Humans	2019-01-01	Human coronavirus OC43 Fukushima_H763_2019 RNA, complete genome	nasopharyngeal swab	Homo sapiens	tan2023
KF514408.1	USA: Nashville, TN	Betacoronavirus	Sarbecovirus	Severe acute respiratory syndrome-related coronavirus	29687					2009-03-18	SARS coronavirus wtic-MB strain SARS/VeroE6_lab/USA/WTic_c2P1/2009, complete genome		sars coronavirus wtic-mb strain sars/veroe6_lab/usa/wtic_c2p1/2009, complete genome	tan2023
KF530084.1	USA: Nashville, TN	Betacoronavirus	Embecovirus	Betacoronavirus 1	30577	Homo sapiens	Homo	sapiens	Humans	1995-01-12	Human coronavirus OC43 strain OC43/human/USA/951-18/1995, complete genome		Homo sapiens; sex: F; age: 10Y	tan2023
KF923906.1	China: Beijing	Betacoronavirus	Embecovirus	Betacoronavirus 1	30737	Homo sapiens	Homo	sapiens	Humans	2012-03-01	Human coronavirus OC43 isolate 3194A/2012, complete genome	nasopharyngeal aspirate	Homo sapiens	tan2023
LC654451.1	Japan: Fukushima	Betacoronavirus	Embecovirus	Betacoronavirus 1	30743	Homo sapiens	Homo	sapiens	Humans	2019-01-01	Human coronavirus OC43 Fukushima_H509_2019 RNA, complete genome		Homo sapiens	tan2023
AY279354.2		Betacoronavirus	Sarbecovirus	Severe acute respiratory syndrome-related coronavirus	29732						SARS coronavirus BJ04, complete genome		sars coronavirus bj04, complete genome	tan2023
OK318943.1	China	Betacoronavirus	Embecovirus	Betacoronavirus 1	30689	Homo sapiens	Homo	sapiens	Humans	2019-01-12	Human coronavirus OC43 strain OC43/China/27/2019, complete genome	nasopharyngeal_swab	Homo sapiens	tan2023
MT984583.1	Hungary	Gammacoronavirus	Igacovirus	Avian coronavirus	27595	Gallus gallus	Gallus	gallus	Birds	2010-01-01	Avian coronavirus strain 11518/Kiskunmajsa/2010/HU, complete genome		Gallus gallus	tan2023
LC687393.1	Japan: Fukushima	Betacoronavirus	Embecovirus	Human coronavirus HKU1	29472	Homo sapiens	Homo	sapiens	Humans	2019-01-01	Human coronavirus HKU1 Fukushima_H519_2019 RNA, complete genome	nasopharyngeal swab	Homo sapiens	tan2023
OW096851.1	United Kingdom:England	Betacoronavirus	Sarbecovirus	Severe acute respiratory syndrome-related coronavirus	29890	Homo sapiens	Homo	sapiens	Humans	2021-12-14	Severe acute respiratory syndrome coronavirus 2 genome assembly, complete genome: monopartite		Homo sapiens	tan2023
KR270796.1	USA: Ohio	Alphacoronavirus	Tegacovirus	Alphacoronavirus 1	27765	Sus	Sus		Pigs	2014-07-24	Porcine respiratory coronavirus strain OH7269, complete genome		pig	tan2023
DQ084200.1		Betacoronavirus	Sarbecovirus	Severe acute respiratory syndrome-related coronavirus	29711	Chiroptera			Bats		bat SARS coronavirus HKU3-3, complete genome		bat sars coronavirus hku3-3, complete genome	tan2023
KJ425496.1	China	Gammacoronavirus	Igacovirus	Avian coronavirus	27606	Gallus gallus	Gallus	gallus	Birds	2013-05-25	Infectious bronchitis virus strain ck/CH/LHB/130573, complete genome		Gallus gallus	tan2023
OK017854.1	China: Yunnan	Betacoronavirus	Sarbecovirus	Sarbecovirus sp.	29368	Rhinolophus sinicus	Rhinolophus	sinicus	Bats	2020-06-01	Sarbecovirus sp. isolate YN2020D, complete genome		Rhinolophus sinicus	tan2023
AY545916.1	China	Betacoronavirus	Sarbecovirus	Severe acute respiratory syndrome-related coronavirus	29721						SARS coronavirus isolate HC/SZ/266/03, complete genome		sars coronavirus isolate hc/sz/266/03, complete genome	tan2023
OM240725.1	China: Guangdong	Betacoronavirus	Unknown	Bat betacoronavirus	29622	Rhinolophus affinis	Rhinolophus	affinis	Bats	2020-09-17	Bat betacoronavirus isolate RaCH025, complete genome	anal swab	Rhinolophus affinis	tan2023
MK720944.1	China	Alphacoronavirus	Nyctacovirus	Alphacoronavirus HKU33	27636	Tylonycteris robustula	Tylonycteris	robustula	Bats	2015-09-09	Tylonycteris bat coronavirus HKU33 strain GZ151867, complete genome	anal swab	Tylonycteris robustula	tan2023
HQ890533.1	USA: Nashville, TN	Betacoronavirus	Sarbecovirus	Severe acute respiratory syndrome-related coronavirus	29646	Mus musculus	Mus	musculus	Rodents	2008-10-10	SARS coronavirus MA15 ExoN1 isolate d4ym3, complete genome		Mus musculus; young	tan2023
NC_046954.1	China	Unknown	Unknown	Rodent coronavirus	31393	Craseomys rufocanus	Myodes	rufocanus	Voles	2014-08-01	Rodent coronavirus isolate RtMruf-CoV-2/JL2014, complete genome		Myodes rufocanus	tan2023
KJ156866.1	Saudi Arabia	Betacoronavirus	Merbecovirus	Middle East respiratory syndrome-related coronavirus	30054	Homo sapiens	Homo	sapiens	Humans	2013-05-02	Middle East respiratory syndrome coronavirus isolate Al-Hasa_25_2013, complete genome		Homo sapiens	tan2023
HG994853.1		Betacoronavirus	Sarbecovirus	Severe acute respiratory syndrome-related coronavirus	29901						Severe acute respiratory syndrome-related coronavirus isolate H_SC_02 genome assembly, complete genome: monopartite		severe acute respiratory syndrome-related coronavirus isolate h_sc_02 genome assembly, complete genome: monopartite	tan2023
KJ361503.1	France	Betacoronavirus	Merbecovirus	Middle East respiratory syndrome-related coronavirus	30040	Homo sapiens	Homo	sapiens	Humans	2013-05-07	Middle East respiratory syndrome coronavirus isolate Hu-France - FRA2_130569-2013_Isolate_Sanger, complete genome	Sputum on Vero E6	Homo sapiens	tan2023
JQ765568.1	USA: Denver, CO	Alphacoronavirus	Setracovirus	Human coronavirus NL63	27487	Homo sapiens	Homo	sapiens	Humans	2005-01-11	Human coronavirus NL63 strain NL63/DEN/2005/193, complete genome	nasal pharyngeal wash from a 22 day old male	Homo sapiens; sex: M	tan2023
LC494148.1	Japan	Betacoronavirus	Embecovirus	Betacoronavirus 1	30946	Bovinae			Bovines	2016-12-01	Bovine coronavirus IWT-22 RNA, complete genome		bovine coronavirus iwt-22 rna, complete genome	tan2023
MF642322.1	China	Deltacoronavirus	Buldecovirus	Coronavirus HKU15	25420	Sus	Sus		Pigs	2016-08-01	Porcine deltacoronavirus strain CHN/GS/2016/1, complete genome	feces	Tibetan pig	tan2023
MF769442.1	China	Alphacoronavirus	Rhinacovirus	Swine acute diarrhea syndrome coronavirus	27173	Sus	Sus		Pigs	2017-01-01	Swine acute diarrhea syndrome coronavirus isolate DCD5, complete genome		swine	tan2023
JQ065046.1	China: Hong Kong	Deltacoronavirus	Buldecovirus	Magpie-robin coronavirus HKU18	26689	Aves			Birds	2007-01-01	Magpie-robin coronavirus HKU18 strain HKU18-chu3, complete genome		magpie-robin	tan2023
MZ293749.1	Bangladesh	Unknown	Unknown	Megaderma bat coronavirus	27296	Megaderma lyra	Megaderma	lyra	Bats	2012-12-22	Megaderma bat coronavirus isolate SBB-120, complete genome	rectal swab	Megaderma lyra	tan2023
DQ415899.1	China: Hong Kong	Betacoronavirus	Embecovirus	Human coronavirus HKU1	29905	Homo	Homo		Humans		Human coronavirus HKU1 strain N22 genotype C, complete genome	nasopharyngeal aspirates of patients diagnosed respiratory tract infection diseases	human coronavirus hku1 strain n22 genotype c, complete genome	tan2023
EU111742.1		Gammacoronavirus	Cegacovirus	Beluga whale coronavirus SW1	31686	Delphinapterus leucas	Delphinapterus	leucas	Cetaceans		Coronavirus SW1, complete genome	whale liver	Delphinapterus leucas (beluga whale)	tan2023
OW122203.1	Slovakia	Betacoronavirus	Sarbecovirus	Severe acute respiratory syndrome-related coronavirus	29864	Homo sapiens	Homo	sapiens	Humans	2022-01-19	Severe acute respiratory syndrome coronavirus 2 isolate RNA genome assembly, complete genome: monopartite		Homo sapiens	tan2023
KX538970.1	Malaysia: Kuala Lumpur	Betacoronavirus	Embecovirus	Betacoronavirus 1	30713	Homo sapiens	Homo	sapiens	Humans	2012-06-20	Human coronavirus OC43 isolate MY-U710/12, complete genome	nasopharyngeal swab	Homo sapiens	tan2023
KY554969.1	USA	Alphacoronavirus	Setracovirus	Human coronavirus NL63	27509	Homo sapiens	Homo	sapiens	Humans	2016-01-01	Human coronavirus NL63 strain N07-196B, complete genome		Homo sapiens	tan2023
LC494126.1	Japan	Betacoronavirus	Embecovirus	Betacoronavirus 1	30951	Bovinae			Bovines	2016-01-01	Bovine coronavirus GIF-1 RNA, complete genome		bovine coronavirus gif-1 rna, complete genome	tan2023
NC_028814.1	China	Alphacoronavirus	Decacovirus	Rhinolophus ferrumequinum alphacoronavirus HuB-2013	27608	Rhinolophus ferrumequinum	Rhinolophus	ferrumequinum	Bats	2013-01-01	BtRf-AlphaCoV/HuB2013, complete genome		Rhinolophus ferrumequinum	tan2023
GQ427176.1	USA	Gammacoronavirus	Igacovirus	Avian coronavirus	27804	Aves			Birds	1998-01-01	Turkey coronavirus strain TCoV/TX-1038/98, complete genome		turkey	tan2023
AY395001.1		Betacoronavirus	Sarbecovirus	Severe acute respiratory syndrome-related coronavirus	29350						SARS coronavirus LC4, complete genome		sars coronavirus lc4, complete genome	tan2023
JQ065042.2	China: Hong Kong	Deltacoronavirus	Buldecovirus	Coronavirus HKU15	25430	Sus	Sus		Pigs	2009-01-01	Porcine coronavirus HKU15 strain HKU15-44, complete genome		pig	tan2023
LC494164.1	Japan	Betacoronavirus	Embecovirus	Betacoronavirus 1	30951	Bovinae			Bovines	2006-11-01	Bovine coronavirus TCG-1 RNA, complete genome		bovine coronavirus tcg-1 rna, complete genome	tan2023
JF292922.1	USA: Nashville, TN	Betacoronavirus	Sarbecovirus	Severe acute respiratory syndrome-related coronavirus	29647					2009-03-18	SARS coronavirus ExoN1 isolate c5P1, complete genome		sars coronavirus exon1 isolate c5p1, complete genome	tan2023
KX118627.1	Laos	Deltacoronavirus	Buldecovirus	Coronavirus HKU15	25405	Sus	Sus		Pigs	2016-01-20	Porcine deltacoronavirus isolate P1_16_BTL_0115/PDCoV/2016/Lao, complete genome	small intestine	pig	tan2023
MG916902.1	China	Unknown	Unknown	Bat coronavirus	29074	Chiroptera			Bats	2012-09-16	Bat coronavirus isolate BtCoV/Rh/YN2012_Rs4125, complete genome		bat coronavirus isolate btcov/rh/yn2012_rs4125, complete genome	tan2023
OK017823.1	China: Guangdong	Betacoronavirus	Sarbecovirus	Sarbecovirus sp.	29512	Rhinolophus sinicus	Rhinolophus	sinicus	Bats	2017-09-01	Sarbecovirus sp. isolate GD2017Q, complete genome		Rhinolophus sinicus	tan2023
MT984593.1	Greece	Gammacoronavirus	Igacovirus	Avian coronavirus	27633	Gallus gallus	Gallus	gallus	Birds	2011-01-01	Avian coronavirus strain D1719/1/2011/GR, complete genome		Gallus gallus	tan2023
KY770860.1	China	Betacoronavirus	Sarbecovirus	Sarbecovirus sp.	29651	Rhinolophus ferrumequinum	Rhinolophus	ferrumequinum	Bats	2012-01-01	Sarbecovirus sp. isolate Jiyuan-84, complete genome		Rhinolophus ferrumequinum	tan2023
KJ620016.1	USA: Michigan	Deltacoronavirus	Buldecovirus	Coronavirus HKU15	25422	Sus	Sus		Pigs	2014-03-18	Porcine coronavirus HKU15 strain MI6148, complete genome		pig	tan2023
ON298261.1	France	Betacoronavirus	Sarbecovirus	Severe acute respiratory syndrome-related coronavirus	29703	Homo sapiens	Homo	sapiens	Humans	2020-09-20	Severe acute respiratory syndrome coronavirus 2 isolate SARS-CoV-2/human/FRA/IHUCOVID-012653_Nova1/2020, complete genome		Homo sapiens	tan2023
MF642323.1	China	Deltacoronavirus	Buldecovirus	Coronavirus HKU15	25420	Sus	Sus		Pigs	2016-08-01	Porcine deltacoronavirus strain CHN/GS/2016/2, complete genome	feces	Tibetan pig	tan2023
MG757140.1	France	Betacoronavirus	Embecovirus	Betacoronavirus 1	31024	Bovinae			Bovines	2014-01-01	Bovine coronavirus isolate ICSA16-LBA, complete genome	bronchoalveolar lavage	cattle	tan2023
FJ882929.1	USA: Tennessee	Betacoronavirus	Sarbecovirus	Severe acute respiratory syndrome-related coronavirus	29665					2008-03-28	SARS coronavirus ExoN1 isolate P3pp1, complete genome		sars coronavirus exon1 isolate p3pp1, complete genome	tan2023
MG011350.1	Saudi Arabia	Betacoronavirus	Merbecovirus	Middle East respiratory syndrome-related coronavirus	30096	Homo sapiens	Homo	sapiens	Humans	2016-04-04	Middle East respiratory syndrome-related coronavirus isolate Hu/Riyadh-KSA-16849/2016, complete genome	respiratory secretions	Homo sapiens	tan2023
AY864805.1	China: Beijing	Betacoronavirus	Sarbecovirus	Severe acute respiratory syndrome-related coronavirus	29751						SARS coronavirus BJ162, complete genome		sars coronavirus bj162, complete genome	tan2023
MH687953.1	Viet Nam	Alphacoronavirus	Unknown	Alphacoronavirus sp.	23258	Scotophilus kuhlii	Scotophilus	kuhlii	Bats	2014-06-11	Alphacoronavirus sp. strain VZ_AlphaCoV_16715_86, complete genome		Scotophilus kuhlii	tan2023
FJ882953.1	USA: Tennessee	Betacoronavirus	Sarbecovirus	Severe acute respiratory syndrome-related coronavirus	29648					2008-11-26	SARS coronavirus MA15 ExoN1 isolate P3pp4, complete genome		sars coronavirus ma15 exon1 isolate p3pp4, complete genome	tan2023
OK391224.1	China	Betacoronavirus	Embecovirus	Betacoronavirus 1	30326	Homo sapiens	Homo	sapiens	Humans	2019-02-20	UNVERIFIED: Human coronavirus OC43 strain OC43/China/31/2019, complete genome	nasopharyngeal swab	Homo sapiens	tan2023
KY419113.1	USA	Betacoronavirus	Embecovirus	Betacoronavirus 1	29900	Sus scrofa	Sus	scrofa	Pigs	2015-07-25	Porcine hemagglutinating encephalomyelitis virus strain PHEV CoV USA-15TOSU1582, complete genome	nasal swab	Sus scrofa scrofa	tan2023
LC260038.1	Japan: Akita	Deltacoronavirus	Buldecovirus	Coronavirus HKU15	25362	Sus scrofa	Sus	scrofa	Pigs	2014-05-01	Porcine deltacoronavirus genomic RNA, complete genome, strain: AKT/JPN/2014		Sus scrofa domesticus	tan2023
KF268337.1	USA: Philadelphia	Betacoronavirus	Embecovirus	Murine coronavirus	31294	Mus musculus	Mus	musculus	Rodents	2012-10-25	Murine coronavirus strain MHV/BHKR_lab/USA/icA59_17Cl1/2012, complete genome		Mus musculus	tan2023
DQ415908.1	China: Hong Kong	Betacoronavirus	Embecovirus	Human coronavirus HKU1	29947	Homo	Homo		Humans		Human coronavirus HKU1 strain N11 genotype A, complete genome	nasopharyngeal aspirates of patients diagnosed respiratory tract infection diseases	human coronavirus hku1 strain n11 genotype a, complete genome	tan2023
OK017831.1	China: Guizhou	Betacoronavirus	Sarbecovirus	Sarbecovirus sp.	29381	Rhinolophus sinicus	Rhinolophus	sinicus	Bats	2021-03-01	Sarbecovirus sp. isolate GZ2021I, complete genome		Rhinolophus sinicus	tan2023
FJ884686.1	USA: Pennsylvania	Betacoronavirus	Embecovirus	Murine coronavirus	31275	Mus	Mus		Rodents		Murine hepatitis virus strain A59 B11 variant, complete genome		mouse	tan2023
LC364346.1	United Arab Emirates	Deltacoronavirus	Buldecovirus	Quail coronavirus UAE-HKU30	25871	Galliformes			Birds	2014-02-19	Quail coronavirus UAE-HKU30 1101F genomic RNA, complete genome		Galliformes sp. (Quail)	tan2023
KT368905.1	Saudi Arabia	Alphacoronavirus	Duvinacovirus	Human coronavirus 229E	27397	Camelus	Camelus		Camelids	2014-12-01	Camel alphacoronavirus isolate camel/Jeddah/D46(a)/2014, complete genome		camel	tan2023
DQ412043.1		Betacoronavirus	Sarbecovirus	Severe acute respiratory syndrome-related coronavirus	29749	Rhinolophus macrotis	Rhinolophus	macrotis	Bats		Bat SARS coronavirus Rm1, complete genome		Rhinolophus macrotis	tan2023
MZ260940.1	USA: Minnesota	Betacoronavirus	Sarbecovirus	Severe acute respiratory syndrome-related coronavirus	29808	Homo sapiens	Homo	sapiens	Humans	2021-05-03	Severe acute respiratory syndrome coronavirus 2 isolate SARS-CoV-2/human/USA/MN-CDC-IBX834499147203/2021, complete genome	NA	Homo sapiens	tan2023
KR265858.1	USA: North Carolina	Deltacoronavirus	Buldecovirus	Coronavirus HKU15	25394	Sus	Sus		Pigs	2014-05-06	Porcine deltacoronavirus strain USA/NorthCarolina452/2014, complete genome		pig	tan2023
MN520204.1	China: Henan	Deltacoronavirus	Buldecovirus	Coronavirus HKU15	25414	Sus	Sus		Pigs	2018-05-01	UNVERIFIED: Porcine deltacoronavirus isolate HN2018-LH2, complete genome		unverified: porcine deltacoronavirus isolate hn2018-lh2, complete genome	tan2023
KF530096.1	USA: Nashville, TN	Betacoronavirus	Embecovirus	Betacoronavirus 1	30589	Homo sapiens	Homo	sapiens	Humans	1991-01-15	Human coronavirus OC43 strain OC43/human/USA/911-38/1991, complete genome		Homo sapiens; sex: F; age: 4Y	tan2023
MK492263.1	Singapore	Unknown	Unknown	Bat coronavirus	29585	Cynopterus brachyotis	Cynopterus	brachyotis	Bats	2015-01-01	Bat coronavirus strain BtCoV92, complete genome		Cynopterus brachyotis	tan2023
MW532115.1	China	Betacoronavirus	Embecovirus	Betacoronavirus 1	30695	Homo sapiens	Homo	sapiens	Humans	2017-08-06	Human coronavirus OC43 strain OC43/China/05/2017, complete genome	nasopharyngeal swab	Homo sapiens	tan2023
MK907286.1	China	Betacoronavirus	Merbecovirus	Erinaceus hedgehog coronavirus HKU31	29951	Erinaceus amurensis	Erinaceus	amurensis	Hedgehogs	2014-08-01	Erinaceus hedgehog coronavirus HKU31 strain F6, complete genome	Alimentary sample	Erinaceus amurensis	tan2023
KU215425.1	Belgium	Alphacoronavirus	Tegacovirus	Alphacoronavirus 1	29262	Felis catus	Felis	catus	Felines	2013-01-01	Feline coronavirus isolate Cat1_day28_withoutdeletion, complete genome		Felis catus	tan2023
MG757139.1	France	Betacoronavirus	Embecovirus	Betacoronavirus 1	31028	Bovinae			Bovines	2014-01-01	Bovine coronavirus isolate ICSA16-EN, complete genome	nasal swab	cattle	tan2023
GQ153540.1		Betacoronavirus	Sarbecovirus	Severe acute respiratory syndrome-related coronavirus	29704	Chiroptera			Bats		Bat SARS coronavirus HKU3-5, complete genome		bat sars coronavirus hku3-5, complete genome	tan2023
MT444152.1	China	Alphacoronavirus	Tegacovirus	Alphacoronavirus 1	28506	Felis	Felis		Felines	2019-05-25	Feline coronavirus strain HF1902, complete genome		cat	tan2023
KC881006.1	China	Betacoronavirus	Sarbecovirus	Severe acute respiratory syndrome-related coronavirus	29792	Rhinolophus sinicus	Rhinolophus	sinicus	Bats	2012-03-19	Bat SARS-like coronavirus Rs3367, complete genome		Rhinolophus sinicus	tan2023
MZ293741.1	Cambodia	Unknown	Unknown	Cynopterus bat coronavirus	29723	Cynopterus brachyotis	Cynopterus	brachyotis	Bats	2011-09-12	Cynopterus bat coronavirus isolate PREDICT/GCS-265, complete genome	rectal swab	Cynopterus brachyotis	tan2023
MZ081378.1	China	Betacoronavirus	Sarbecovirus	Betacoronavirus sp. RmYN08	29712	Rhinolophus malayanus	Rhinolophus	malayanus	Bats	2020-07-14	Betacoronavirus sp. RmYN08 strain bat/Yunnan/RmYN08/2020, complete genome	bat feces	Rhinolophus malayanus	tan2023
MW711287.1	China	Betacoronavirus	Embecovirus	Betacoronavirus 1	31008	Bovinae			Bovines	2020-09-01	Bovine coronavirus isolate SWUN/NMG-D10/2020, complete genome	calf feces	bovine coronavirus isolate swun/nmg-d10/2020, complete genome	tan2023
MH687947.1	Viet Nam	Alphacoronavirus	Unknown	Alphacoronavirus sp.	22363	Scotophilus kuhlii	Scotophilus	kuhlii	Bats	2014-06-17	Alphacoronavirus sp. strain VZ_AlphaCoV_16715_63, complete genome		Scotophilus kuhlii	tan2023
KY073746.1	Kenya	Alphacoronavirus	Setracovirus	NL63-related bat coronavirus strain BtKYNL63-9b	28442	Triaenops afer	Triaenops	afer	Bats	2008-08-06	NL63-related bat coronavirus strain BtKYNL63-15, complete genome	fecal swab	Triaenops afer	tan2023
LC494142.1	Japan	Betacoronavirus	Embecovirus	Betacoronavirus 1	30954	Bovinae			Bovines	2016-12-01	Bovine coronavirus IWT-18 RNA, complete genome		bovine coronavirus iwt-18 rna, complete genome	tan2023
EF424618.1	USA:Ohio	Betacoronavirus	Embecovirus	Betacoronavirus 1	30995	Bovinae			Bovines		Bovine coronavirus R-AH65-TC, complete genome		bovine	tan2023
OK500301.1	China	Betacoronavirus	Embecovirus	Betacoronavirus 1	30581	Homo sapiens	Homo	sapiens	Humans	2019-12-10	Human coronavirus OC43 strain OC43/China/57/2019, complete genome	nasopharyngeal_swab	Homo sapiens	tan2023
AY394978.1		Betacoronavirus	Sarbecovirus	Severe acute respiratory syndrome-related coronavirus	29640						SARS coronavirus GZ-B, complete genome		sars coronavirus gz-b, complete genome	tan2023
AY395003.1		Betacoronavirus	Sarbecovirus	Severe acute respiratory syndrome-related coronavirus	29647						SARS coronavirus ZS-C, complete genome		sars coronavirus zs-c, complete genome	tan2023
KM349743.1	China	Betacoronavirus	Embecovirus	China Rattus coronavirus HKU24	31249	Rattus norvegicus	Rattus	norvegicus	Rodents	2012-05-17	Betacoronavirus HKU24 strain HKU24-R05009I, complete genome		Rattus norvegicus (Norway rat)	tan2023
KT368901.1	Saudi Arabia	Alphacoronavirus	Duvinacovirus	Human coronavirus 229E	27396	Camelus	Camelus		Camelids	2014-11-01	Camel alphacoronavirus isolate camel/Jeddah/N68(a)/2014, complete genome		camel	tan2023
JQ989270.1	China	Alphacoronavirus	Decacovirus	Bat coronavirus HKU10	28494	Chiroptera			Bats	2005-10-01	Rousettus bat coronavirus HKU10 isolate 183A, complete genome		bat	tan2023
KX834352.1	Viet Nam	Deltacoronavirus	Buldecovirus	Coronavirus HKU15	25406	Sus	Sus		Pigs	2015-12-08	Porcine deltacoronavirus strain PDCoV/Swine/Vietnam/Binh21/2015, complete genome	feces	pig	tan2023
MF370205.1	China: Guangdong	Alphacoronavirus	Rhinacovirus	Rhinolophus bat coronavirus HKU2	27155	Sus	Sus		Pigs	2017-01-01	Rhinolophus bat coronavirus HKU2 isolate Swine enteric alphacoronavirus CH/GD-01/2017/P2, complete genome	small intestine of a diarrheal piglet	swine	tan2023
MW773844.1	China	Betacoronavirus	Embecovirus	Betacoronavirus 1	31383	Rattus norvegicus	Rattus	norvegicus	Rodents	2017-03-07	Betacoronavirus 1 strain GCCDC4, complete genome		Rattus norvegicus	tan2023
MH002340.1	China	Betacoronavirus	Merbecovirus	Pipistrellus bat coronavirus HKU5	30494	Pipistrellus pipistrellus	Pipistrellus	pipistrellus	Bats	2014-06-26	Pipistrellus bat coronavirus HKU5 isolate BY140535, complete genome		Pipistrellus pipistrellus	tan2023
KJ473821.1	China	Betacoronavirus	Merbecovirus	Middle East respiratory syndrome-related coronavirus	30423	Vespertilio sinensis	Vespertilio	sinensis	Bats		BtVs-BetaCoV/SC2013, complete genome		Vespertilio superans	tan2023
MG197714.1	China	Betacoronavirus	Embecovirus	Betacoronavirus 1	30551	Homo	Homo		Humans	2015-07-13	Human coronavirus OC43 strain CC-23, complete genome	throat swabs or nasopharyngeal aspirates	human coronavirus oc43 strain cc-23, complete genome	tan2023
OM906404.1	USA: Colorado	Betacoronavirus	Sarbecovirus	Severe acute respiratory syndrome-related coronavirus	29770	Homo sapiens	Homo	sapiens	Humans	2022-02-03	Severe acute respiratory syndrome coronavirus 2 isolate SARS-CoV-2/human/USA/CO-CDC-MMB14152674/2022, complete genome	nasal swab	Homo sapiens	tan2023
KX900403.1	USA: Illinois	Alphacoronavirus	Tegacovirus	Alphacoronavirus 1	28521	Sus	Sus		Pigs	2008-04-09	Transmissible gastroenteritis virus strain TGEV/USA/Illinois146/2008, complete genome	intestine	transmissible gastroenteritis virus strain tgev/usa/illinois146/2008, complete genome	tan2023
KF530097.1	USA: Nashville, TN	Betacoronavirus	Embecovirus	Betacoronavirus 1	30577	Homo sapiens	Homo	sapiens	Humans	1992-11-30	Human coronavirus OC43 strain OC43/human/USA/9211-43/1992, complete genome		Homo sapiens; sex: M; age: 18Y	tan2023
OK017841.1	China: Jiangxi	Betacoronavirus	Sarbecovirus	Sarbecovirus sp.	29350	Rhinolophus sinicus	Rhinolophus	sinicus	Bats	2021-07-01	Sarbecovirus sp. isolate JX2021L, complete genome		Rhinolophus sinicus	tan2023
KT368895.1	Saudi Arabia	Alphacoronavirus	Duvinacovirus	Human coronavirus 229E	27396	Camelus	Camelus		Camelids	2014-10-01	Camel alphacoronavirus isolate camel/Jeddah/O23(a)/2014, complete genome		camel	tan2023
MZ081383.1	China	Alphacoronavirus	Unknown	Alphacoronavirus sp.	28019	Chaerephon plicatus	Chaerephon	plicatus	Felines	2019-07-11	Alphacoronavirus sp. strain bat/Yunnan/CpYN11/2019, complete genome	bat feces	Chaerephon plicatus	tan2023
AF029248.1		Betacoronavirus	Embecovirus	Murine coronavirus	31357	Mus	Mus		Rodents		Mouse hepatitis virus strain MHV-A59 C12 mutant, complete genome		mouse hepatitis virus strain mhv-a59 c12 mutant, complete genome	tan2023
AY559084.1	Singapore	Betacoronavirus	Sarbecovirus	Severe acute respiratory syndrome-related coronavirus	29722						SARS coronavirus Sin3765V, complete genome		sars coronavirus sin3765v, complete genome	tan2023
MG428703.1	Kenya	Alphacoronavirus	Setracovirus	Human coronavirus NL63	27685	Homo sapiens	Homo	sapiens	Humans	2010-06-01	Human coronavirus NL63 isolate Kilifi_HH_0511_01-Jun-2010, complete genome		Homo sapiens	tan2023
LC687394.1	Japan: Fukushima	Alphacoronavirus	Setracovirus	Human coronavirus NL63	27563	Homo sapiens	Homo	sapiens	Humans	2018-01-01	Human coronavirus NL63 Fukushima_H257_2018 RNA, complete genome	nasopharyngeal swab	Homo sapiens	tan2023
KX538967.1	Malaysia: Kuala Lumpur	Betacoronavirus	Embecovirus	Betacoronavirus 1	30716	Homo sapiens	Homo	sapiens	Humans	2012-05-02	Human coronavirus OC43 isolate MY-U413/12, complete genome	nasopharyngeal swab	Homo sapiens	tan2023
JF292906.1	USA: Nashville, TN	Betacoronavirus	Sarbecovirus	Severe acute respiratory syndrome-related coronavirus	29646	Mus musculus	Mus	musculus	Rodents	2008-09-18	SARS coronavirus MA15 ExoN1 isolate d3om5, complete genome		Mus musculus; old	tan2023
JF292913.1	USA: Nashville, TN	Betacoronavirus	Sarbecovirus	Severe acute respiratory syndrome-related coronavirus	29646	Mus musculus	Mus	musculus	Rodents	2008-10-10	SARS coronavirus MA15 isolate d4ym3, complete genome		Mus musculus; young	tan2023
MT984585.1	Greece	Gammacoronavirus	Igacovirus	Avian coronavirus	27547	Gallus gallus	Gallus	gallus	Birds	2010-01-01	Avian coronavirus strain D1478/2/2/2010/GR, complete genome		Gallus gallus	tan2023
KM820765.1	South Korea	Deltacoronavirus	Buldecovirus	Coronavirus HKU15	25422	Sus	Sus		Pigs	2014-04-01	Porcine deltacoronavirus KNU14-04, complete genome	feces	pig	tan2023
MZ802775.1	Thailand	Deltacoronavirus	Buldecovirus	Coronavirus HKU15	25406	Sus scrofa	Sus	scrofa	Pigs	2016-01-01	Porcine deltacoronavirus strain PDCoV/NKP-1/2016/Thailand, complete genome	piglet small intestine	Sus scrofa	tan2023
OM912683.1	Mexico: South	Gammacoronavirus	Igacovirus	Avian coronavirus	27531	Gallus gallus	Gallus	gallus	Birds	2021-07-11	Infectious bronchitis virus isolate IBV/ck/MEX/2743/21, complete genome	choanal cleft/lung swab; 28-day-old chicken	Gallus gallus domesticus (broiler); SEPRL-ID:2743	tan2023
LC315647.2	Japan: Tokyo	Betacoronavirus	Embecovirus	Betacoronavirus 1	30755	Homo sapiens	Homo	sapiens	Humans	2014-01-01	Human coronavirus OC43 Tokyo/SGH-61/2014 RNA, complete genome	nasal swab using HBTE-ALI cells	Homo sapiens	tan2023
MF598599.1	United Arab Emirates	Betacoronavirus	Merbecovirus	Middle East respiratory syndrome-related coronavirus	30123	Camelus dromedarius	Camelus	dromedarius	Camelids	2015-03-01	Middle East respiratory syndrome-related coronavirus strain camel/UAE_B7_2015, complete genome	nasopharyngeal swab	Camelus dromedarius	tan2023
MZ081386.1	China	Alphacoronavirus	Unknown	Alphacoronavirus sp.	29161	Rhinolophus sinicus	Rhinolophus	sinicus	Bats	2019-10-22	Alphacoronavirus sp. strain bat/Yunnan/RsYN12/2019, complete genome	bat feces	Rhinolophus sinicus	tan2023
AY654624.1		Betacoronavirus	Sarbecovirus	Severe acute respiratory syndrome-related coronavirus	29745						SARS coronavirus TJF, complete genome		sars coronavirus tjf, complete genome	tan2023
FJ376622.1	Hong Kong	Deltacoronavirus	Buldecovirus	Munia coronavirus HKU13	26552	Aves			Birds	2007-04-01	Munia coronavirus HKU13-3514, complete genome		white-rumped munia	tan2023
MT549854.1	China	Unknown	Unknown	Rodent coronavirus	28648	Rattus norvegicus	Rattus	norvegicus	Rodents	2016-12-01	Rodent coronavirus isolate SD-S9, complete genome	feces	Rattus norvegicus	tan2023
MH687957.1	Viet Nam	Alphacoronavirus	Unknown	Alphacoronavirus sp.	28173	Scotophilus kuhlii	Scotophilus	kuhlii	Bats	2014-09-18	Alphacoronavirus sp. strain VZ_AlphaCoV_16845_64, complete genome		Scotophilus kuhlii	tan2023
KU729220.1	China: pig farm, suburb of Haerbin, Heilongjiang province	Alphacoronavirus	Tegacovirus	Alphacoronavirus 1	28539	Sus scrofa	Sus	scrofa	Pigs	1998-02-10	Transmissible gastroenteritis virus strain TH-98, complete genome		Sus scrofa (swine)	tan2023
KY967357.1	USA	Alphacoronavirus	Duvinacovirus	Human coronavirus 229E	27242	Homo sapiens	Homo	sapiens	Humans	2015-01-01	Human coronavirus 229E strain HCoV_229E/Seattle/USA/SC2872/2015, complete genome		Homo sapiens	tan2023
KY014281.1	France	Betacoronavirus	Embecovirus	Betacoronavirus 1	30602	Homo sapiens	Homo	sapiens	Humans	2002-01-01	Human coronavirus OC43 isolate 2002-04, complete genome		Homo sapiens	tan2023
LC494153.1	Japan	Betacoronavirus	Embecovirus	Betacoronavirus 1	30944	Bovinae			Bovines	2017-02-01	Bovine coronavirus IWT-27 RNA, complete genome		bovine coronavirus iwt-27 rna, complete genome	tan2023
NC_026011.1	China	Betacoronavirus	Embecovirus	China Rattus coronavirus HKU24	31249	Rattus norvegicus	Rattus	norvegicus	Rodents	2012-05-17	Betacoronavirus HKU24 strain HKU24-R05005I, complete genome		Rattus norvegicus (Norway rat)	tan2023
MF041982.1	China	Deltacoronavirus	Buldecovirus	Coronavirus HKU15	25414	Sus	Sus		Pigs	2016-12-23	Porcine deltacoronavirus strain SHJS/SL/2016, complete genome		pig	tan2023
NC_025217.1	China	Betacoronavirus	Hibecovirus	Bat Hp-betacoronavirus Zhejiang2013	31491	Hipposideros pratti	Hipposideros	pratti	Bats	2013-04-29	Bat Hp-betacoronavirus/Zhejiang2013, complete genome		Hipposideros pratti	tan2023
KT368871.1	Saudi Arabia	Betacoronavirus	Merbecovirus	Middle East respiratory syndrome-related coronavirus	30118	Camelus dromedarius	Camelus	dromedarius	Camelids	2015-03-01	Middle East respiratory syndrome coronavirus isolate camel/Riyadh/Ry162/2015, complete genome		Camelus dromedarius	tan2023
KF514388.1	USA: Nashville, TN	Betacoronavirus	Sarbecovirus	Severe acute respiratory syndrome-related coronavirus	29687					2010-10-01	SARS coronavirus wtic-MB strain SARS/VeroE6_lab/USA/WTic_c1.5P20/2010, complete genome		sars coronavirus wtic-mb strain sars/veroe6_lab/usa/wtic_c1.5p20/2010, complete genome	tan2023
OK078017.1	China	Alphacoronavirus	Rhinacovirus	Swine acute diarrhea syndrome coronavirus	27188	Sus	Sus		Pigs	2018-01-01	Swine acute diarrhea syndrome coronavirus isolate SADS-CoV-CH-JX2/2018, complete genome		swine	tan2023
HQ012370.1	Netherlands	Alphacoronavirus	Tegacovirus	Alphacoronavirus 1	29266	Felinae			Felines	2008-01-03	Feline coronavirus UU24, complete genome		feline	tan2023
KR265830.1	USA: Ohio	Alphacoronavirus	Pedacovirus	Porcine epidemic diarrhea virus	27989	Sus	Sus		Pigs	2014-04-03	Porcine epidemic diarrhea virus strain USA/Ohio300/2014 from USA, complete genome	slva	pig	tan2023
KY983587.1	USA	Alphacoronavirus	Duvinacovirus	Human coronavirus 229E	27235	Homo sapiens	Homo	sapiens	Humans	2015-01-01	Human coronavirus 229E strain HCoV_229E/Seattle/USA/SC3112/2015, complete genome		Homo sapiens	tan2023
KY369909.2	USA	Alphacoronavirus	Duvinacovirus	Human coronavirus 229E	26592	Homo sapiens	Homo	sapiens	Humans	2016-01-01	Human coronavirus 229E strain HCoV_229E/Seattle/USA/SC677/2016, complete genome		Homo sapiens	tan2023
MK211376.1	China	Betacoronavirus	Sarbecovirus	Coronavirus BtRs-BetaCoV/YN2018B	30256	Rhinolophus affinis	Rhinolophus	affinis	Bats	2016-09-01	Coronavirus BtRs-BetaCoV/YN2018B, complete genome		Rhinolophus affinis	tan2023
KR265849.1	USA: Michigan	Deltacoronavirus	Buldecovirus	Coronavirus HKU15	25393	Sus	Sus		Pigs	2014-04-02	Porcine deltacoronavirus strain USA/Michigan447/2014, complete genome		pig	tan2023
MZ802955.1	China	Deltacoronavirus	Buldecovirus	Coronavirus HKU15	25403	Sus	Sus		Pigs	2020-09-01	Porcine deltacoronavirus isolate CH-HLJ-20, complete genome		swine	tan2023
DQ415903.1	China: Hong Kong	Betacoronavirus	Embecovirus	Human coronavirus HKU1	29920	Homo	Homo		Humans		Human coronavirus HKU1 strain N3 genotype A, complete genome	nasopharyngeal aspirates of patients diagnosed respiratory tract infection diseases	human coronavirus hku1 strain n3 genotype a, complete genome	tan2023
MN690610.1	USA	Gammacoronavirus	Cegacovirus	Bottlenose dolphin coronavirus	31728	Tursiops	Tursiops		Cetaceans		Bottlenose dolphin coronavirus strain 37112-3, complete genome	feces	bottlenose dolphin	tan2023
MW024789.1	USA	Gammacoronavirus	Igacovirus	Avian coronavirus	27486	Gallus gallus	Gallus	gallus	Birds	2020-01-06	Avian coronavirus IA1162/2020, complete genome	tracheal swabs	Gallus gallus; layer type	tan2023
NC_017083.1	China	Betacoronavirus	Embecovirus	Rabbit coronavirus HKU14	31100	Oryctolagus cuniculus	Oryctolagus	cuniculus	Lagomorphs	2006-01-01	Rabbit coronavirus HKU14, complete genome		Oryctolagus cuniculus	tan2023
KR265859.1	USA: Minnesota	Deltacoronavirus	Buldecovirus	Coronavirus HKU15	25401	Sus	Sus		Pigs	2014-02-11	Porcine deltacoronavirus strain USA/Minnesota159/2014, complete genome		pig	tan2023
JX993987.1	China	Betacoronavirus	Sarbecovirus	Severe acute respiratory syndrome-related coronavirus	29484	Rhinolophus pusillus	Rhinolophus	pusillus	Bats	2011-09-01	Bat coronavirus Rp/Shaanxi2011, complete genome		Rhinolophus pusillus	tan2023
MZ081376.1	China	Betacoronavirus	Sarbecovirus	Betacoronavirus sp. RmYN05	29712	Rhinolophus malayanus	Rhinolophus	malayanus	Bats	2020-05-25	Betacoronavirus sp. RmYN05 strain bat/Yunnan/RmYN05/2020, complete genome	bat feces	Rhinolophus malayanus	tan2023
ON146444.1	USA: Nebraska	Betacoronavirus	Embecovirus	Betacoronavirus 1	31016	Bovinae			Bovines	2014-10-17	Bovine coronavirus strain MARC/BRCV_2014, complete genome	nasal swab	bovine	tan2023
MH687952.1	Viet Nam	Alphacoronavirus	Unknown	Alphacoronavirus sp.	27225	Scotophilus kuhlii	Scotophilus	kuhlii	Bats	2014-06-10	Alphacoronavirus sp. strain VZ_AlphaCoV_16715_84, complete genome		Scotophilus kuhlii	tan2023
EF065511.1	China: Guangdong province	Betacoronavirus	Merbecovirus	Pipistrellus bat coronavirus HKU5	30488	Chiroptera			Bats		Bat coronavirus HKU5-3, complete genome		bat	tan2023
MK303620.1		Betacoronavirus	Embecovirus	Betacoronavirus 1	30665	Homo	Homo		Humans		Human coronavirus OC43 isolate MDS2, complete genome		human coronavirus oc43 isolate mds2, complete genome	tan2023
MZ328300.1	China	Alphacoronavirus	Unknown	Jingmen Miniopterus schreibersii alphacoronavirus 2	28074	Miniopterus schreibersii	Miniopterus	schreibersii	Bats	2016-01-01	Jingmen Miniopterus schreibersii alphacoronavirus 2, complete genome		Miniopterus schreibersii	tan2023
KU900738.1	South Korea	Gammacoronavirus	Igacovirus	Avian coronavirus	27679	Gallus gallus	Gallus	gallus	Birds	2008-01-01	Infectious bronchitis virus strain SNU-8065, complete genome		Gallus gallus	tan2023
KY417146.1	China	Betacoronavirus	Sarbecovirus	Severe acute respiratory syndrome-related coronavirus	29782	Rhinolophus sinicus	Rhinolophus	sinicus	Bats	2013-04-17	Bat SARS-like coronavirus isolate Rs4231, complete genome		Rhinolophus sinicus	tan2023
KF514403.1	USA: Nashville, TN	Betacoronavirus	Sarbecovirus	Severe acute respiratory syndrome-related coronavirus	29687					2010-10-01	SARS coronavirus ExoN1 strain SARS/VeroE6_lab/USA/ExoN1_c5.1P20/2010, complete genome		sars coronavirus exon1 strain sars/veroe6_lab/usa/exon1_c5.1p20/2010, complete genome	tan2023
AY545917.1	China	Betacoronavirus	Sarbecovirus	Severe acute respiratory syndrome-related coronavirus	29739						SARS coronavirus isolate HC/GZ/81/03, complete genome		sars coronavirus isolate hc/gz/81/03, complete genome	tan2023
NC_004718.3	Canada: Toronto	Betacoronavirus	Sarbecovirus	Severe acute respiratory syndrome-related coronavirus	29751	Homo sapiens	Homo	sapiens	Humans		SARS coronavirus Tor2, complete genome		Homo sapiens; patient #2 with severe acute respiratory syndrome (SARS)	tan2023
NC_039208.1	China: Hong Kong	Deltacoronavirus	Buldecovirus	Coronavirus HKU15	25425	Sus	Sus		Pigs	2010-01-01	Porcine coronavirus HKU15 strain HKU15-155, complete genome		pig	tan2023
HQ392469.1	Netherlands	Alphacoronavirus	Tegacovirus	Alphacoronavirus 1	29233	Felis catus	Felis	catus	Felines	2008-01-22	Feline coronavirus UU40, complete genome		Felis catus	tan2023
KC545383.1	Germany	Betacoronavirus	Merbecovirus	Hedgehog coronavirus 1	30148	Erinaceus europaeus	Erinaceus	europaeus	Hedgehogs	2012-01-01	Betacoronavirus Erinaceus/VMC/DEU/2012 isolate ErinaceusCoV/2012-174/GER/2012, complete genome	feces	Erinaceus europaeus	tan2023
AY283794.1	Singapore	Betacoronavirus	Sarbecovirus	Severe acute respiratory syndrome-related coronavirus	29711						SARS coronavirus Sin2500, complete genome		sars coronavirus sin2500, complete genome	tan2023
KX022604.1	USA: Nebraska	Deltacoronavirus	Buldecovirus	Coronavirus HKU15	25382	Sus	Sus		Pigs	2015-11-27	Porcine deltacoronavirus strain PDCoV/USA/Nebraska137/2015, complete genome	feces	pig	tan2023
OK017835.1	China: Hunan	Betacoronavirus	Sarbecovirus	Sarbecovirus sp.	29541	Rhinolophus sinicus	Rhinolophus	sinicus	Bats	2021-03-01	Sarbecovirus sp. isolate HN2021F, complete genome		Rhinolophus sinicus	tan2023
FJ647222.1	USA: Pennsylvania	Betacoronavirus	Embecovirus	Murine coronavirus	31283	Mus musculus	Mus	musculus	Rodents		Murine coronavirus SA59/RJHM, complete genome		Mus musculus	tan2023
MG772933.1	China	Betacoronavirus	Sarbecovirus	Severe acute respiratory syndrome-related coronavirus	29802	Rhinolophus pusillus	Rhinolophus	pusillus	Bats	2017-02-01	Bat SARS-like coronavirus isolate bat-SL-CoVZC45, complete genome		Rhinolophus pusillus	tan2023
JX503060.1	Netherlands	Alphacoronavirus	Duvinacovirus	Human coronavirus 229E	27263	Homo sapiens	Homo	sapiens	Humans	2010-01-01	Human coronavirus 229E isolate 0349, complete genome	respiratory swab	Homo sapiens	tan2023
KF923909.1	China: Beijing	Betacoronavirus	Embecovirus	Betacoronavirus 1	30713	Homo sapiens	Homo	sapiens	Humans	2007-06-01	Human coronavirus OC43 isolate 5442/2007, complete genome	nasal and throat swab	Homo sapiens	tan2023
MN611524.1	China	Alphacoronavirus	Minunacovirus	Miniopterus schreibersii bat coronavirus 1-related	28316	Miniopterus schreibersii	Miniopterus	schreibersii	Bats	2018-03-01	Miniopterus schreibersii bat coronavirus 1-related isolate 161454, complete genome		Miniopterus schreibersii	tan2023
MK211378.1	China	Betacoronavirus	Sarbecovirus	Coronavirus BtRs-BetaCoV/YN2018D	30213	Rhinolophus affinis	Rhinolophus	affinis	Bats	2016-09-01	Coronavirus BtRs-BetaCoV/YN2018D, complete genome		Rhinolophus affinis	tan2023
OK655840.1	USA	Unknown	Unknown	Fievel mouse coronavirus	27663	Mus musculus	Mus	musculus	Rodents	2018-01-01	Fievel mouse coronavirus strain FiCoV/UMN2020, complete genome		Mus musculus	tan2023
KT806045.1	Saudi Arabia	Betacoronavirus	Merbecovirus	Middle East respiratory syndrome-related coronavirus	30096	Homo sapiens	Homo	sapiens	Humans	2015-02-22	Middle East respiratory syndrome coronavirus isolate Hu/Jeddah-KSA-C21271/2015, complete genome	respiratory secretions	Homo sapiens	tan2023
AY641576.1		Gammacoronavirus	Igacovirus	Avian coronavirus	27434	Aves			Birds		Avian infectious bronchitis virus isolate Peafowl/GD/KQ6/2003, complete genome		avian infectious bronchitis virus isolate peafowl/gd/kq6/2003, complete genome	tan2023
OM009282.1		Betacoronavirus	Unknown	Pangolin coronavirus HKU4/P251T/pangolin/2018	30344	Pholidota			Pangolins	2018-01-01	Pangolin coronavirus HKU4/P251T/pangolin/2018, complete genome		pangolin	tan2023
KY829118.1	USA	Alphacoronavirus	Setracovirus	Human coronavirus NL63	27513	Homo sapiens	Homo	sapiens	Humans	2015-01-01	Human coronavirus NL63 strain N07-262B, complete genome		Homo sapiens	tan2023
NC_009019.1	China: Guangdong province	Betacoronavirus	Merbecovirus	Tylonycteris bat coronavirus HKU4	30286	Chiroptera			Bats		Tylonycteris bat coronavirus HKU4, complete genome		bat	tan2023
MK990812.1	Australia	Gammacoronavirus	Igacovirus	Avian coronavirus	27596	Gallus gallus	Gallus	gallus	Birds	1990-01-01	Infectious bronchitis virus strain Ck/Aus/V5/90, complete genome	allantoic fluid	Gallus gallus	tan2023
OM950728.1	China	Alphacoronavirus	Tegacovirus	Alphacoronavirus 1	29367	Canis	Canis		Canines	2020-01-01	Canine coronavirus isolate GH8-2, complete genome		raccoon dog	tan2023
LC710779.1	Germany	Gammacoronavirus	Igacovirus	Avian coronavirus	27608	Gallus gallus	Gallus	gallus	Birds	2016-01-01	Avian coronavirus Beaudette-FUB RNA, complete genome	infected chicken	Gallus gallus	tan2023
JX163924.1	USA	Betacoronavirus	Sarbecovirus	Severe acute respiratory syndrome-related coronavirus	29646					2010-02-05	SARS coronavirus Tor2 isolate Tor2/FP1-10851, complete genome		sars coronavirus tor2 isolate tor2/fp1-10851, complete genome	tan2023
LC683779.1		Gammacoronavirus	Igacovirus	Avian coronavirus	27675	Gallus gallus	Gallus	gallus	Birds		Infectious bronchitis virus JP/Toyama/2000 RNA, complete genome		Gallus gallus domesticus	tan2023
DQ415906.1	China: Hong Kong	Betacoronavirus	Embecovirus	Human coronavirus HKU1	29857	Homo	Homo		Humans		Human coronavirus HKU1 strain N9 genotype A, complete genome	nasopharyngeal aspirates of patients diagnosed respiratory tract infection diseases	human coronavirus hku1 strain n9 genotype a, complete genome	tan2023
AY291451.1	Taiwan	Betacoronavirus	Sarbecovirus	Severe acute respiratory syndrome-related coronavirus	29729						SARS coronavirus TW1, complete genome		sars coronavirus tw1, complete genome	tan2023
MT430884.1	China	Betacoronavirus	Unknown	Apodemus peninsulae coronavirus	31270	Apodemus peninsulae	Apodemus	peninsulae	Rodents	2019-07-01	Apodemus peninsulae coronavirus, complete genome	feces of rats	Apodemus peninsulae	tan2023
MW532111.1	China	Betacoronavirus	Embecovirus	Betacoronavirus 1	30677	Homo sapiens	Homo	sapiens	Humans	2009-03-12	Human coronavirus OC43 strain OC43/China/01/2009, complete genome	nasopharyngeal swab	Homo sapiens	tan2023
MK994934.1	China	Alphacoronavirus	Rhinacovirus	Swine acute diarrhea syndrome coronavirus	27165	Sus	Sus		Pigs	2017-01-01	Swine acute diarrhea syndrome coronavirus isolate SADS-CoV/GDWT-P7, complete genome		swine	tan2023
LC260041.1	Japan: Iwate	Deltacoronavirus	Buldecovirus	Coronavirus HKU15	25362	Sus scrofa	Sus	scrofa	Pigs	2014-05-01	Porcine deltacoronavirus genomic RNA, complete genome, strain: IWT/JPN/2014		Sus scrofa domesticus	tan2023
JN854286.1	United Kingdom	Betacoronavirus	Sarbecovirus	Severe acute respiratory syndrome-related coronavirus	29727					2003-04-16	SARS coronavirus HKU-39849 isolate recSARS-CoV HKU-39849, complete genome	Vero cells	sars coronavirus hku-39849 isolate recsars-cov hku-39849, complete genome	tan2023
KT368832.1	Saudi Arabia	Betacoronavirus	Merbecovirus	Middle East respiratory syndrome-related coronavirus	30118	Camelus	Camelus		Camelids	2014-12-01	Middle East respiratory syndrome coronavirus isolate camel/Jeddah/D36/2014, complete genome		camel	tan2023
MF598622.1	United Arab Emirates	Betacoronavirus	Merbecovirus	Middle East respiratory syndrome-related coronavirus	30123	Camelus dromedarius	Camelus	dromedarius	Camelids	2015-03-01	Middle East respiratory syndrome-related coronavirus strain camel/UAE_B30_2015, complete genome	nasopharyngeal swab	Camelus dromedarius	tan2023
MK211377.1	China	Betacoronavirus	Sarbecovirus	Coronavirus BtRs-BetaCoV/YN2018C	29689	Rhinolophus affinis	Rhinolophus	affinis	Bats	2016-09-01	Coronavirus BtRs-BetaCoV/YN2018C, complete genome		Rhinolophus affinis	tan2023
DQ811788.1		Alphacoronavirus	Tegacovirus	Alphacoronavirus 1	28571	Sus	Sus		Pigs		TGEV Purdue P115, complete genome		pig	tan2023
AY297028.1		Betacoronavirus	Sarbecovirus	Severe acute respiratory syndrome-related coronavirus	29715						SARS coronavirus ZJ01, complete genome		sars coronavirus zj01, complete genome	tan2023
OK017829.1	China: Guizhou	Betacoronavirus	Sarbecovirus	Sarbecovirus sp.	29392	Rhinolophus sinicus	Rhinolophus	sinicus	Bats	2021-03-01	Sarbecovirus sp. isolate GZ2021C, complete genome		Rhinolophus sinicus	tan2023
MT984594.1	Greece	Gammacoronavirus	Igacovirus	Avian coronavirus	27594	Gallus gallus	Gallus	gallus	Birds	2011-01-01	Avian coronavirus strain D1760/2/2/2011/GR, complete genome		Gallus gallus	tan2023
KP849472.1	Italy	Alphacoronavirus	Tegacovirus	Alphacoronavirus 1	30004	Canis lupus familiaris	Canis	lupus	Canines	2003-01-01	Alphacoronavirus 1 strain 23/03, complete genome	feces	Canis lupus familiaris	tan2023
MK423877.1	China	Gammacoronavirus	Igacovirus	Avian coronavirus	27652	Aves			Birds	2017-01-01	Pheasant coronavirus strain gammaCoV/ph/China/I0623/17, complete genome		Pheasant	tan2023
KF530095.1	USA: Nashville, TN	Betacoronavirus	Embecovirus	Betacoronavirus 1	30602	Homo sapiens	Homo	sapiens	Humans	1991-02-05	Human coronavirus OC43 strain OC43/human/USA/912-6/1991, complete genome		Homo sapiens; sex: M; age: 5Y	tan2023
OK017859.1	China: Guangxi	Betacoronavirus	Sarbecovirus	Sarbecovirus sp.	29507	Rhinolophus siamensis	Rhinolophus	siamensis	Bats	2019-09-01	Sarbecovirus sp. isolate GX2019A, complete genome		Rhinolophus siamensis	tan2023
MH687956.1	Viet Nam	Alphacoronavirus	Unknown	Alphacoronavirus sp.	28050	Scotophilus kuhlii	Scotophilus	kuhlii	Bats	2014-09-16	Alphacoronavirus sp. strain VZ_AlphaCoV_16845_53, complete genome		Scotophilus kuhlii	tan2023
EF424617.1	USA:Ohio	Betacoronavirus	Embecovirus	Betacoronavirus 1	31016	Bovinae			Bovines		Bovine coronavirus R-AH65, complete genome		bovine	tan2023
LC494158.1	Japan	Betacoronavirus	Embecovirus	Betacoronavirus 1	30950	Bovinae			Bovines	2016-06-01	Bovine coronavirus SHG-5 RNA, complete genome		bovine coronavirus shg-5 rna, complete genome	tan2023
KX252772.1	China	Gammacoronavirus	Igacovirus	Avian coronavirus	27682	Gallus gallus	Gallus	gallus	Birds	2003-01-01	Infectious bronchitis virus strain ck/CH/LSHH/03II, complete genome		Gallus gallus	tan2023
KF530089.1	USA: Nashville, TN	Betacoronavirus	Embecovirus	Betacoronavirus 1	30611	Homo sapiens	Homo	sapiens	Humans	1991-01-29	Human coronavirus OC43 strain OC43/human/USA/911-66/1991, complete genome		Homo sapiens; sex: F; age: 15Y	tan2023
MH687950.1	Viet Nam	Alphacoronavirus	Unknown	Alphacoronavirus sp.	28155	Scotophilus kuhlii	Scotophilus	kuhlii	Bats	2014-06-10	Alphacoronavirus sp. strain VZ_AlphaCoV_16715_77, complete genome		Scotophilus kuhlii	tan2023
KF530065.1	USA: Nashville, TN	Betacoronavirus	Embecovirus	Betacoronavirus 1	30577	Homo sapiens	Homo	sapiens	Humans	1990-01-17	Human coronavirus OC43 strain OC43/human/USA/901-41/1990, complete genome		Homo sapiens; sex: M; age: 17Y	tan2023
KU973692.1	China	Betacoronavirus	Sarbecovirus	Severe acute respiratory syndrome-related coronavirus	29722	Chiroptera			Bats	2012-01-01	UNVERIFIED: Severe acute respiratory syndrome-related coronavirus isolate F46, complete genome		bat	tan2023
DQ811785.1	USA:Ohio	Alphacoronavirus	Tegacovirus	Alphacoronavirus 1	28542	Sus	Sus		Pigs		TGEV Miller M6, complete genome		pig	tan2023
HQ890527.1	USA: Nashville, TN	Betacoronavirus	Sarbecovirus	Severe acute respiratory syndrome-related coronavirus	29646	Mus musculus	Mus	musculus	Rodents	2008-10-08	SARS coronavirus MA15 ExoN1 isolate d2ym2, complete genome		Mus musculus; young	tan2023
KJ473799.1	China	Alphacoronavirus	Minunacovirus	Miniopterus bat coronavirus HKU8	28765	Miniopterus fuliginosus	Miniopterus	fuliginosus	Bats	2012-01-01	BtMf-AlphaCoV/FJ2012, complete genome		Miniopterus fuliginosus	tan2023
KT253326.1	Saudi Arabia	Alphacoronavirus	Duvinacovirus	Human coronavirus 229E	27193	Camelus dromedarius	Camelus	dromedarius	Camelids	2014-01-01	Camel alphacoronavirus Camel229E isolate Camel229E-CoV/JC52/KSA/2014, complete genome	cell culture supernatant	Camelus dromedarius	tan2023
KF530068.1	USA: Nashville, TN	Betacoronavirus	Embecovirus	Betacoronavirus 1	30572	Homo sapiens	Homo	sapiens	Humans	2000-07-27	Human coronavirus OC43 strain OC43/human/USA/007-11/2000, complete genome		Homo sapiens; sex: M; age: 21Y	tan2023
OC995946.1	United Kingdom:England	Betacoronavirus	Sarbecovirus	Severe acute respiratory syndrome-related coronavirus	29903	Homo sapiens	Homo	sapiens	Humans	2020-11-08	Severe acute respiratory syndrome coronavirus 2 genome assembly, complete genome: monopartite		Homo sapiens	tan2023
LC494168.1	Japan	Betacoronavirus	Embecovirus	Betacoronavirus 1	30950	Bovinae			Bovines	2009-01-01	Bovine coronavirus TCG-13 RNA, complete genome		bovine coronavirus tcg-13 rna, complete genome	tan2023
JQ765575.1	USA: Denver, CO	Alphacoronavirus	Setracovirus	Human coronavirus NL63	27487	Homo sapiens	Homo	sapiens	Humans	2005-11-21	Human coronavirus NL63 strain NL63/DEN/2005/1876, complete genome	nasal pharyngeal wash from a 5 month old female	Homo sapiens; sex: F	tan2023
LC260042.1	Japan: Miyazaki	Deltacoronavirus	Buldecovirus	Coronavirus HKU15	25362	Sus scrofa	Sus	scrofa	Pigs	2014-03-01	Porcine deltacoronavirus genomic RNA, complete genome, strain: MYZ/JPN/2014		Sus scrofa domesticus	tan2023
KY554967.1	USA	Alphacoronavirus	Setracovirus	Human coronavirus NL63	27523	Homo sapiens	Homo	sapiens	Humans	2016-01-01	Human coronavirus NL63 strain N06-1144B, complete genome		Homo sapiens	tan2023
KR061459.1	Italy	Alphacoronavirus	Tegacovirus	Alphacoronavirus 1	28111	Sus	Sus		Pigs	2009-09-04	Swine enteric coronavirus strain Italy/213306/2009, complete genome		pig	tan2023
MG923477.1	Nigeria	Betacoronavirus	Merbecovirus	Middle East respiratory syndrome-related coronavirus	29458	Camelus dromedarius	Camelus	dromedarius	Camelids	2016-02-17	Middle East respiratory syndrome-related coronavirus isolate MERS-CoV camel/Nigeria/NV2040/2016, complete genome		Camelus dromedarius	tan2023
KY554968.1	USA	Alphacoronavirus	Setracovirus	Human coronavirus NL63	27523	Homo sapiens	Homo	sapiens	Humans	2016-01-01	Human coronavirus NL63 strain N07-185B, complete genome		Homo sapiens	tan2023
MZ937003.2	Laos	Unknown	Unknown	Bat coronavirus	29844	Rhinolophus marshalli	Rhinolophus	marshalli	Bats	2020-07-10	Bat coronavirus isolate BANAL-20-236/Laos/2020, complete genome	rectal swabs	Rhinolophus marshalli	tan2023
FJ425184.1	USA: Ohio	Betacoronavirus	Embecovirus	Betacoronavirus 1	30995	Bovidae			Bovids	1994-01-01	Waterbuck coronavirus US/OH-WD358-TC/1994, complete genome		waterbuck	tan2023
KF460437.1	Australia	Gammacoronavirus	Igacovirus	Avian coronavirus	27610	Gallus gallus	Gallus	gallus	Birds	2011-01-01	Infectious bronchitis virus isolate VicS-v, complete genome	Allantoic fluid, embryonated eggs	Gallus gallus	tan2023
EF203065.1		Alphacoronavirus	Rhinacovirus	Rhinolophus bat coronavirus HKU2	27164	Chiroptera			Bats		Bat coronavirus HKU2 strain HKU2/HK/46/2006, complete genome		bat coronavirus hku2 strain hku2/hk/46/2006, complete genome	tan2023
KX034094.1	South Korea	Betacoronavirus	Merbecovirus	Middle East respiratory syndrome-related coronavirus	30111	Homo sapiens	Homo	sapiens	Humans	2015-06-11	Middle East respiratory syndrome coronavirus isolate MERS-CoV/KOR/Seoul/050-1-2015, complete genome	sputum	Homo sapiens	tan2023
NC_028824.1	China	Alphacoronavirus	Rhinacovirus	BtRf-AlphaCoV/YN2012	26975	Rhinolophus ferrumequinum	Rhinolophus	ferrumequinum	Bats	2012-01-01	BtRf-AlphaCoV/YN2012, complete genome		Rhinolophus ferrumequinum	tan2023
KY419105.1	USA	Betacoronavirus	Embecovirus	Betacoronavirus 1	30513	Sus scrofa	Sus	scrofa	Pigs	2015-08-20	Porcine hemagglutinating encephalomyelitis virus strain PHEV-CoV/swine/USA/15TOSU0582/2015, complete genome	nasal swab	Sus scrofa scrofa	tan2023
MF642324.1	China	Deltacoronavirus	Buldecovirus	Coronavirus HKU15	25420	Sus	Sus		Pigs	2017-04-01	Porcine deltacoronavirus strain CHN/GS/2017/1, complete genome	feces	Tibetan pig	tan2023
OK017801.1	China: Hubei	Betacoronavirus	Sarbecovirus	Sarbecovirus sp.	29552	Rhinolophus	Rhinolophus		Bats	2020-07-01	Sarbecovirus sp. isolate HB2020D, complete genome		Rhinolophus sp.	tan2023
MW349841.1	China	Deltacoronavirus	Unknown	Deltacoronavirus HNU2	26240	Aves			Birds		Deltacoronavirus HNU2, complete genome		common magpie	tan2023
MZ450972.1	USA	Betacoronavirus	Embecovirus	Betacoronavirus 1	30688	Homo sapiens	Homo	sapiens	Humans	2021-01-01	Human coronavirus OC43 strain OC43/Seattle/USA/20959/2021, complete genome		Homo sapiens	tan2023
MG518518.1	South Korea: Chungnam	Betacoronavirus	Embecovirus	Betacoronavirus 1	31034	Hydropotes inermis	Hydropotes	inermis	Deers	2017-02-24	Water deer coronavirus isolate W17-18, complete genome		Hydropotes inermis (water deer)	tan2023
OK391221.1	China	Betacoronavirus	Embecovirus	Betacoronavirus 1	29936	Homo sapiens	Homo	sapiens	Humans	2018-12-15	UNVERIFIED: Human coronavirus OC43 strain OC43/China/23/2019, complete genome	nasopharyngeal swab	Homo sapiens	tan2023
KF793824.1		Gammacoronavirus	Cegacovirus	Beluga whale coronavirus SW1	31769	Tursiops	Tursiops		Cetaceans		Bottlenose dolphin coronavirus HKU22 isolate CF090325, complete genome		bottlenose dolphin coronavirus hku22 isolate cf090325, complete genome	tan2023
NC_046965.1	Canada	Gammacoronavirus	Unknown	Canada goose coronavirus	28539	Branta canadensis	Branta	canadensis	Birds	2017-08-01	Canada goose coronavirus strain Cambridge_Bay_2017, complete genome	cloacal swab	Branta canadensis	tan2023
AY283795.1	Singapore	Betacoronavirus	Sarbecovirus	Severe acute respiratory syndrome-related coronavirus	29705						SARS coronavirus Sin2677, complete genome		sars coronavirus sin2677, complete genome	tan2023
JQ404410.1		Alphacoronavirus	Tegacovirus	Alphacoronavirus 1	29364	Canis	Canis		Canines		Canine coronavirus strain TN-449, complete genome	dog which died of gastroenteritis	dog	tan2023
KY369908.1	USA	Alphacoronavirus	Duvinacovirus	Human coronavirus 229E	27193	Homo sapiens	Homo	sapiens	Humans	2016-01-01	Human coronavirus 229E strain HCoV_229E/Seattle/USA/SC579/2016, complete genome		Homo sapiens	tan2023
EF065508.1	China: Guangdong province	Betacoronavirus	Merbecovirus	Tylonycteris bat coronavirus HKU4	30316	Chiroptera			Bats		Bat coronavirus HKU4-4, complete genome		bat	tan2023
LC654456.1	Japan: Tokyo	Betacoronavirus	Embecovirus	Betacoronavirus 1	30737	Homo sapiens	Homo	sapiens	Humans	2016-01-01	Human coronavirus OC43 Tokyo_SGH-71_2016 RNA, complete genome		Homo sapiens	tan2023
MF598623.1	United Arab Emirates	Betacoronavirus	Merbecovirus	Middle East respiratory syndrome-related coronavirus	30123	Camelus dromedarius	Camelus	dromedarius	Camelids	2015-03-01	Middle East respiratory syndrome-related coronavirus strain camel/UAE_B31_2015, complete genome	nasopharyngeal swab	Camelus dromedarius	tan2023
MH687965.1	Viet Nam	Alphacoronavirus	Unknown	Alphacoronavirus sp.	28115	Scotophilus kuhlii	Scotophilus	kuhlii	Bats	2015-02-13	Alphacoronavirus sp. strain VZ_AlphaCoV_20745_17, complete genome		Scotophilus kuhlii	tan2023
AY321118.1		Betacoronavirus	Sarbecovirus	Severe acute respiratory syndrome-related coronavirus	29725						SARS coronavirus TWC, complete genome		sars coronavirus twc, complete genome	tan2023
OK017805.1	China: Hunan	Betacoronavirus	Sarbecovirus	Sarbecovirus sp.	29571	Rhinolophus pusillus	Rhinolophus	pusillus	Bats	2021-03-01	Sarbecovirus sp. isolate HN2021G, complete genome		Rhinolophus pusillus	tan2023
MW345814.1	China	Deltacoronavirus	Unknown	Deltacoronavirus HNU1-1	26289	Aves			Birds		Deltacoronavirus HNU1-1, complete genome		common magpie	tan2023
MK303625.1		Betacoronavirus	Embecovirus	Betacoronavirus 1	30668	Homo	Homo		Humans		Human coronavirus OC43 isolate MDS16, complete genome		human coronavirus oc43 isolate mds16, complete genome	tan2023
LC494192.1	Japan	Betacoronavirus	Embecovirus	Betacoronavirus 1	30942	Bovinae			Bovines	2017-12-01	Bovine coronavirus TCG-33 RNA, complete genome		bovine coronavirus tcg-33 rna, complete genome	tan2023
MK423876.1	China	Gammacoronavirus	Igacovirus	Avian coronavirus	27655	Aves			Birds	2017-01-01	Pheasant coronavirus strain gammaCoV/ph/China/I0710/17, complete genome		Pheasant	tan2023
OK017794.1	China: Liaoning	Betacoronavirus	Sarbecovirus	Sarbecovirus sp.	29167	Rhinolophus ferrumequinum	Rhinolophus	ferrumequinum	Bats	2020-09-01	Sarbecovirus sp. isolate LN2020A, complete genome		Rhinolophus ferrumequinum	tan2023
KT266906.1	Haiti	Alphacoronavirus	Setracovirus	Human coronavirus NL63	27553	Homo sapiens	Homo	sapiens	Humans	2015-01-16	Human coronavirus NL63 isolate HCoV NL63/Haiti-1/2015, complete genome	plasma	Homo sapiens	tan2023
LC654445.1	Japan: Fukushima	Alphacoronavirus	Duvinacovirus	Human coronavirus 229E	27263	Homo sapiens	Homo	sapiens	Humans	2020-01-01	Human coronavirus 229E Fukushima_H829_2020 RNA, complete genome		Homo sapiens	tan2023
KX361345.1	Thailand	Deltacoronavirus	Buldecovirus	Coronavirus HKU15	25406	Sus	Sus		Pigs	2015-12-01	Porcine deltacoronavirus isolate P24_15_NT1_1215/PDCoV/2015/Thailand, complete genome	intestine	pig	tan2023
MN520192.1	China: Zhejiang	Deltacoronavirus	Buldecovirus	Coronavirus HKU15	25419	Sus	Sus		Pigs	2018-08-01	UNVERIFIED: Porcine deltacoronavirus isolate ZJ2018-D, complete genome		unverified: porcine deltacoronavirus isolate zj2018-d, complete genome	tan2023
MF769423.1	China	Alphacoronavirus	Rhinacovirus	Swine acute diarrhea syndrome coronavirus	27173	Sus	Sus		Pigs	2017-01-01	Swine acute diarrhea syndrome coronavirus isolate 175, complete genome		swine	tan2023
KR265850.1	USA: Michigan	Deltacoronavirus	Buldecovirus	Coronavirus HKU15	25394	Sus	Sus		Pigs	2014-04-02	Porcine deltacoronavirus strain USA/Michigan448/2014, complete genome		pig	tan2023
MT984590.1	Hungary	Gammacoronavirus	Igacovirus	Avian coronavirus	27581	Gallus gallus	Gallus	gallus	Birds	2011-01-01	Avian coronavirus strain D1623/1/1/2011/HU, complete genome		Gallus gallus	tan2023
DQ415897.1	China: Hong Kong	Betacoronavirus	Embecovirus	Human coronavirus HKU1	29845	Homo	Homo		Humans		Human coronavirus HKU1 strain N20 genotype C, complete genome	nasopharyngeal aspirates of patients diagnosed respiratory tract infection diseases	human coronavirus hku1 strain n20 genotype c, complete genome	tan2023
HQ890544.1	USA: Nashville, TN	Betacoronavirus	Sarbecovirus	Severe acute respiratory syndrome-related coronavirus	29646	Mus musculus	Mus	musculus	Rodents	2008-09-17	SARS coronavirus MA15 isolate d2om3, complete genome		Mus musculus; old	tan2023
AY559083.1	Singapore	Betacoronavirus	Sarbecovirus	Severe acute respiratory syndrome-related coronavirus	29767						SARS coronavirus Sin3408, complete genome		sars coronavirus sin3408, complete genome	tan2023
KJ425488.1	China	Gammacoronavirus	Igacovirus	Avian coronavirus	27642	Gallus gallus	Gallus	gallus	Birds	2011-08-25	Infectious bronchitis virus strain ck/CH/LHB/110825, complete genome		Gallus gallus	tan2023
OK017798.1	China: Liaoning	Betacoronavirus	Sarbecovirus	Sarbecovirus sp.	29167	Rhinolophus ferrumequinum	Rhinolophus	ferrumequinum	Bats	2020-09-01	Sarbecovirus sp. isolate LN2020F, complete genome		Rhinolophus ferrumequinum	tan2023
MZ210360.1	USA: Texas	Betacoronavirus	Sarbecovirus	Severe acute respiratory syndrome-related coronavirus	29880	Homo sapiens	Homo	sapiens	Humans	2021-04-09	Severe acute respiratory syndrome coronavirus 2 isolate SARS-CoV-2/human/USA/TX-CDC-ASC210054183/2021, complete genome	Nasal - Anterior Nares	Homo sapiens	tan2023
GU553364.1	China: Hong Kong	Betacoronavirus	Sarbecovirus	Severe acute respiratory syndrome-related coronavirus	29644	Homo sapiens	Homo	sapiens	Humans	2003-06-07	SARS coronavirus HKU-39849 isolate TCVSP-HARROD-00002, complete genome		Homo sapiens	tan2023
GQ153544.1		Betacoronavirus	Sarbecovirus	Severe acute respiratory syndrome-related coronavirus	29695	Chiroptera			Bats		Bat SARS coronavirus HKU3-9, complete genome		bat sars coronavirus hku3-9, complete genome	tan2023
MZ293748.1	Bangladesh	Unknown	Unknown	Megaderma bat coronavirus	27276	Megaderma lyra	Megaderma	lyra	Bats	2013-05-23	Megaderma bat coronavirus isolate SBB-053, complete genome	rectal swab	Megaderma lyra	tan2023
KF530080.1	USA: Nashville, TN	Betacoronavirus	Embecovirus	Betacoronavirus 1	30577	Homo sapiens	Homo	sapiens	Humans	1997-12-18	Human coronavirus OC43 strain OC43/human/USA/9712-31/1997, complete genome		Homo sapiens; sex: M; age: 6Y	tan2023
NC_048212.1	Cameroon	Unknown	Unknown	Bat coronavirus	28975	Eidolon helvum	Eidolon	helvum	Bats	2013-12-01	Bat coronavirus, complete genome	Feces	Eidolon helvum	tan2023
MT984596.1	Hungary	Gammacoronavirus	Igacovirus	Avian coronavirus	27636	Gallus gallus	Gallus	gallus	Birds	2012-01-01	Avian coronavirus strain D1871/1/1/2012/HU, complete genome		Gallus gallus	tan2023
OK017792.1	China: Guangdong	Betacoronavirus	Sarbecovirus	Sarbecovirus sp.	29537	Rhinolophus affinis	Rhinolophus	affinis	Bats	2017-08-01	Sarbecovirus sp. isolate GD2017F, complete genome		Rhinolophus affinis	tan2023
MT984602.1	Romania	Gammacoronavirus	Igacovirus	Avian coronavirus	27791	Gallus gallus	Gallus	gallus	Birds	2012-01-01	Avian coronavirus strain D20222/2/3/2012/RO, complete genome		Gallus gallus	tan2023
KX348114.1	China	Gammacoronavirus	Igacovirus	Avian coronavirus	27687	Gallus gallus	Gallus	gallus	Birds	2005-01-01	Infectious bronchitis virus strain ck/CH/LDL/05III, complete genome		Gallus gallus	tan2023
KP886808.1	China	Betacoronavirus	Sarbecovirus	Severe acute respiratory syndrome-related coronavirus	29723	Rhinolophus Ferrumequinum	Rhinolophus	ferrumequinum	Bats	2013-05-23	Bat SARS-like coronavirus YNLF_31C, complete genome		Rhinolophus Ferrumequinum	tan2023
KF923886.1	China: Beijing	Betacoronavirus	Embecovirus	Betacoronavirus 1	30719	Homo sapiens	Homo	sapiens	Humans	2010-03-01	Human coronavirus OC43 isolate 1908A/2010, complete genome	nasopharyngeal aspirate	Homo sapiens	tan2023
KX900410.1	USA: Minnesota	Alphacoronavirus	Tegacovirus	Alphacoronavirus 1	28521	Sus	Sus		Pigs	2014-02-04	Transmissible gastroenteritis virus strain TGEV/USA/Minnesota153/2014, complete genome	feces	transmissible gastroenteritis virus strain tgev/usa/minnesota153/2014, complete genome	tan2023
OM802899.1	China	Alphacoronavirus	Tegacovirus	Alphacoronavirus 1	28020	Sus	Sus		Pigs	2019-07-04	Transmissible gastroenteritis virus strain SZ19, complete genome		swine	tan2023
MT576083.1	China	Alphacoronavirus	Tegacovirus	Alphacoronavirus 1	28571	Sus	Sus		Pigs	2016-03-01	Transmissible gastroenteritis virus isolate HQ2016, complete genome	intestine tissues	pig	tan2023
MT955604.1	India	Alphacoronavirus	Tegacovirus	Alphacoronavirus 1	29381	Canidae			Canids		UNVERIFIED: Canine coronavirus isolate PVNRTVU/2020-0001, complete genome		canine	tan2023
OK318918.1	China	Betacoronavirus	Embecovirus	Betacoronavirus 1	30651	Homo sapiens	Homo	sapiens	Humans	2019-06-03	Human coronavirus OC43 strain OC43/China/38/2019, complete genome	nasopharyngeal_swab	Homo sapiens	tan2023
OK017806.1	China: Yunnan	Betacoronavirus	Sarbecovirus	Sarbecovirus sp.	29617	Rhinolophus pusillus	Rhinolophus	pusillus	Bats	2021-04-01	Sarbecovirus sp. isolate YN2021, complete genome		Rhinolophus pusillus	tan2023
OK067320.1	Madagascar: Maromizaha	Betacoronavirus	Nobecovirus	Rousettus madagascariensis nobecovirus	28926	Rousettus madagascariensis	Rousettus	madagascariensis	Bats	2018-04-14	Rousettus madagascariensis nobecovirus isolate MIZ178, complete genome	feces	Rousettus madagascariensis	tan2023
FJ882934.1	USA: Tennessee	Betacoronavirus	Sarbecovirus	Severe acute respiratory syndrome-related coronavirus	29647					2008-03-28	SARS coronavirus wtic-MB isolate P3pp29, complete genome		sars coronavirus wtic-mb isolate p3pp29, complete genome	tan2023
KU558922.1	Bangladesh	Betacoronavirus	Embecovirus	Betacoronavirus 1	31039	Bubalus bubalis	Bubalus	bubalis	Bovines	2014-10-01	Betacoronavirus 1 isolate Buffalo coronavirus B1-24F, complete genome		Bubalus bubalis	tan2023
MT659926.1	China: Zhejiang province	Alphacoronavirus	Pedacovirus	Porcine epidemic diarrhea virus	28032	Sus scrofa	Sus	scrofa	Pigs	2019-02-01	Porcine epidemic diarrhea virus, complete genome		Sus scrofa domesticus	tan2023
JX524171.1	China	Alphacoronavirus	Setracovirus	Human coronavirus NL63	27538	Homo sapiens	Homo	sapiens	Humans	2009-01-24	Human coronavirus NL63 isolate CBJ123, complete genome	nasopharyngeal aspirate of a 2-year and 11-month child who was hospitalized in Beijing Children's Hospital suffering from pneumonia	Homo sapiens	tan2023
OK017810.1	China: Fujian	Betacoronavirus	Sarbecovirus	Sarbecovirus sp.	29439	Rhinolophus sinicus	Rhinolophus	sinicus	Bats	2021-05-01	Sarbecovirus sp. isolate FJ2021E, complete genome		Rhinolophus sinicus	tan2023
MG757141.1	France	Betacoronavirus	Embecovirus	Betacoronavirus 1	31019	Bovinae			Bovines	2014-01-01	Bovine coronavirus isolate ICSA-pool-EN, complete genome	nasal swab	cattle	tan2023
OM777140.1	Taiwan	Deltacoronavirus	Buldecovirus	Coronavirus HKU15	25392	Sus	Sus		Pigs	2021-01-01	Porcine deltacoronavirus strain NTU/C253/21, complete genome		Pig	tan2023
HQ890545.1	USA: Nashville, TN	Betacoronavirus	Sarbecovirus	Severe acute respiratory syndrome-related coronavirus	29646	Mus musculus	Mus	musculus	Rodents	2008-09-17	SARS coronavirus MA15 isolate d2om4, complete genome		Mus musculus; old	tan2023
ON476506.1	USA: Arizona, Pinal	Betacoronavirus	Sarbecovirus	Severe acute respiratory syndrome-related coronavirus	29765	Homo sapiens	Homo	sapiens	Humans	2022-02-13	Severe acute respiratory syndrome coronavirus 2 isolate SARS-CoV-2/human/USA/TG1227939/2022, complete genome	clinical	Homo sapiens	tan2023
HQ890543.1	USA: Nashville, TN	Betacoronavirus	Sarbecovirus	Severe acute respiratory syndrome-related coronavirus	29646	Mus musculus	Mus	musculus	Rodents	2008-09-17	SARS coronavirus MA15 isolate d2om2, complete genome		Mus musculus; old	tan2023
MN520191.1	China: Shandong	Deltacoronavirus	Buldecovirus	Coronavirus HKU15	25382	Sus	Sus		Pigs	2019-01-01	UNVERIFIED: Porcine deltacoronavirus isolate SD2019-426, complete genome		unverified: porcine deltacoronavirus isolate sd2019-426, complete genome	tan2023
DQ443743.1	China	Alphacoronavirus	Tegacovirus	Alphacoronavirus 1	28590	Sus	Sus		Pigs		Transmissible gastroenteritis virus strain SC-Y, complete genome	whole cell lysate	transmissible gastroenteritis virus strain sc-y, complete genome	tan2023
MF769443.1	China	Alphacoronavirus	Rhinacovirus	Swine acute diarrhea syndrome coronavirus	27173	Sus	Sus		Pigs	2017-01-01	Swine acute diarrhea syndrome coronavirus isolate DCD6, complete genome		swine	tan2023
LC364343.1	United Arab Emirates	Deltacoronavirus	Buldecovirus	Houbara coronavirus UAE-HKU28	26155	Chlamydotis	Chlamydotis		Birds	2013-04-07	Houbara coronavirus UAE-HKU28 285F genomic RNA, complete genome		Chlamydotis sp. (Houbara)	tan2023
MH687960.1	Viet Nam	Alphacoronavirus	Unknown	Alphacoronavirus sp.	27303	Scotophilus kuhlii	Scotophilus	kuhlii	Bats	2014-11-13	Alphacoronavirus sp. strain VZ_AlphaCoV_17819_22, complete genome		Scotophilus kuhlii	tan2023
OK017842.1	China: Jiangxi	Betacoronavirus	Sarbecovirus	Sarbecovirus sp.	29337	Rhinolophus sinicus	Rhinolophus	sinicus	Bats	2021-07-01	Sarbecovirus sp. isolate JX2021M, complete genome		Rhinolophus sinicus	tan2023
LC687397.1	Japan: Fukushima	Alphacoronavirus	Setracovirus	Human coronavirus NL63	27544	Homo sapiens	Homo	sapiens	Humans	2019-01-01	Human coronavirus NL63 Fukushima_O579_2019 RNA, complete genome	nasopharyngeal swab	Homo sapiens	tan2023
MT726043.1	Uganda	Betacoronavirus	Sarbecovirus	Sarbecovirus sp.	29243	Rhinolophus	Rhinolophus		Bats	2013-05-30	Sarbecovirus sp. isolate PREDICT/PDF-2386/OTBA40RSV, complete genome	feces	Rhinolophus sp. (bat)	tan2023
MH687940.1	Viet Nam	Alphacoronavirus	Unknown	Alphacoronavirus sp.	28170	Scotophilus kuhlii	Scotophilus	kuhlii	Bats	2014-06-10	Alphacoronavirus sp. strain VZ_AlphaCoV_16715_45, complete genome		Scotophilus kuhlii	tan2023
AY559082.1	Singapore	Betacoronavirus	Sarbecovirus	Severe acute respiratory syndrome-related coronavirus	29670						SARS coronavirus Sin852, complete genome		sars coronavirus sin852, complete genome	tan2023
MZ434564.1	USA: Georgia	Betacoronavirus	Sarbecovirus	Severe acute respiratory syndrome-related coronavirus	29795	Homo sapiens	Homo	sapiens	Humans	2021-05-11	Severe acute respiratory syndrome coronavirus 2 isolate SARS-CoV-2/human/USA/GA-CDC-MMB08754819/2021, complete genome	nasal swab	Homo sapiens	tan2023
FJ938058.1	Netherlands: Utrecht	Alphacoronavirus	Tegacovirus	Alphacoronavirus 1	28479	Felis	Felis		Felines	2007-06-07	Feline coronavirus UU16, complete genome		cat	tan2023
KU982977.1	USA: Texas	Alphacoronavirus	Pedacovirus	Porcine epidemic diarrhea virus	28003	Sus	Sus		Pigs	2015-11-05	Porcine epidemic diarrhea virus strain PEDV/USA/Texas132/2015, complete genome	fecal swab	pig	tan2023
KX361343.1	Thailand	Deltacoronavirus	Buldecovirus	Coronavirus HKU15	25406	Sus	Sus		Pigs	2013-02-01	Porcine deltacoronavirus isolate P1_13_ST1_0213/PDCoV/0213/Thailand, complete genome	intestine	pig	tan2023
DQ415905.1	China: Hong Kong	Betacoronavirus	Embecovirus	Human coronavirus HKU1	29857	Homo	Homo		Humans		Human coronavirus HKU1 strain N7 genotype A, complete genome	nasopharyngeal aspirates of patients diagnosed respiratory tract infection diseases	human coronavirus hku1 strain n7 genotype a, complete genome	tan2023
OU707000.1	Slovakia	Betacoronavirus	Sarbecovirus	Severe acute respiratory syndrome-related coronavirus	29896	Homo sapiens	Homo	sapiens	Humans	2021-08-11	Severe acute respiratory syndrome coronavirus 2 isolate RNA genome assembly, complete genome: monopartite		Homo sapiens	tan2023
FJ882937.1	USA: Tennessee	Betacoronavirus	Sarbecovirus	Severe acute respiratory syndrome-related coronavirus	29648					2008-03-28	SARS coronavirus wtic-MB isolate P3pp18, complete genome		sars coronavirus wtic-mb isolate p3pp18, complete genome	tan2023
JX169866.1	USA	Betacoronavirus	Embecovirus	Murine coronavirus	30729	Murinae			Rodents	1947-08-14	Murine coronavirus strain JHM-WU-Dns2, complete genome		murine coronavirus strain jhm-wu-dns2, complete genome	tan2023
MN306046.1	USA	Alphacoronavirus	Duvinacovirus	Human coronavirus 229E	27270	Homo sapiens	Homo	sapiens	Humans	2019-01-01	Human coronavirus 229E strain HCoV_229E/Seattle/USA/SC0865/2019, complete genome		Homo sapiens	tan2023
MH726363.1	China	Alphacoronavirus	Pedacovirus	Porcine epidemic diarrhea virus	28038	Sus scrofa	Sus	scrofa	Pigs	2012-06-22	Porcine epidemic diarrhea virus isolate GDS20, complete genome	small intestine	Sus scrofa	tan2023
FJ938060.1	USA: California	Alphacoronavirus	Tegacovirus	Alphacoronavirus 1	29256	Felis	Felis		Felines	1993-03-30	Feline coronavirus UU2, complete genome		cat	tan2023
AY559088.1	Singapore	Betacoronavirus	Sarbecovirus	Severe acute respiratory syndrome-related coronavirus	29714						SARS coronavirus SinP1, complete genome		sars coronavirus sinp1, complete genome	tan2023
FJ882936.1	USA: Tennessee	Betacoronavirus	Sarbecovirus	Severe acute respiratory syndrome-related coronavirus	29646					2008-03-28	SARS coronavirus wtic-MB isolate P3pp2, complete genome		sars coronavirus wtic-mb isolate p3pp2, complete genome	tan2023
KF923916.1	China: Beijing	Betacoronavirus	Embecovirus	Betacoronavirus 1	30713	Homo sapiens	Homo	sapiens	Humans	2007-06-01	Human coronavirus OC43 isolate 5519/2007, complete genome	nasal and throat swab	Homo sapiens	tan2023
MN482243.1	Denmark: Moensted	Unknown	Unknown	Bat coronavirus	28117	Myotis daubentonii	Myotis	daubentonii	Bats	2015-11-01	MAG: Bat coronavirus isolate BtCoV/21164-6/M.dau/DK/2015, complete genome	feces	Myotis daubentonii	tan2023
OK017820.1	China: Guangdong	Betacoronavirus	Sarbecovirus	Sarbecovirus sp.	29552	Rhinolophus sinicus	Rhinolophus	sinicus	Bats	2017-09-01	Sarbecovirus sp. isolate GD2017N, complete genome		Rhinolophus sinicus	tan2023
MN173779.1	China	Deltacoronavirus	Buldecovirus	Coronavirus HKU15	25406	Sus	Sus		Pigs	2018-01-01	Porcine deltacoronavirus isolate CHN-GX11-2018, complete genome		porcine deltacoronavirus isolate chn-gx11-2018, complete genome	tan2023
LC494128.1	Japan	Betacoronavirus	Embecovirus	Betacoronavirus 1	30954	Bovinae			Bovines	2012-05-01	Bovine coronavirus IWT-10 RNA, complete genome		bovine coronavirus iwt-10 rna, complete genome	tan2023
MG977447.1	Cote d'Ivoire	Betacoronavirus	Embecovirus	Betacoronavirus 1	30705	Pan troglodytes	Pan	troglodytes	Primates	2016-12-26	Human coronavirus OC43 isolate TNP F1832_2, complete genome		Pan troglodytes verus	tan2023
LT898416.1		Alphacoronavirus	Pedacovirus	Porcine epidemic diarrhea virus	28013	Sus	Sus		Pigs		Porcine epidemic diarrhea virus isolate PEDV_GER_L01017-K01_15-07_2015 genome assembly, complete genome: monopartite		porcine epidemic diarrhea virus isolate pedv_ger_l01017-k01_15-07_2015 genome assembly, complete genome: monopartite	tan2023
OK017824.1	China: Guangdong	Betacoronavirus	Sarbecovirus	Sarbecovirus sp.	29537	Rhinolophus sinicus	Rhinolophus	sinicus	Bats	2017-09-01	Sarbecovirus sp. isolate GD2017W, complete genome		Rhinolophus sinicus	tan2023
MH697599.1	China	Alphacoronavirus	Rhinacovirus	Rhinolophus bat coronavirus HKU2	27183	Sus	Sus		Pigs	2017-02-01	UNVERIFIED_ASMBLY: Porcine enteric alphacoronavirus isolate PEAV_GDS04_P12, complete genome	intestinal contents	porcine	tan2023
MG812376.1	USA: IL	Deltacoronavirus	Buldecovirus	Sparrow deltacoronavirus	25796	Aves			Birds	2017-01-01	Sparrow deltacoronavirus strain ISU690-7, complete genome	fecal sample	sparrow	tan2023
LC364342.1	United Arab Emirates	Deltacoronavirus	Buldecovirus	Falcon coronavirus UAE-HKU27	26162	Falco	Falco		Birds	2013-12-05	Falcon coronavirus UAE-HKU27 988F genomic RNA, complete genome		Falco sp.	tan2023
MG772808.1	South Korea	Alphacoronavirus	Setracovirus	Human coronavirus NL63	27535	Homo sapiens	Homo	sapiens	Humans	2014-11-25	Human coronavirus NL63 isolate CN0601/14, complete genome	throat swab from patient	Homo sapiens	tan2023
LC260044.1	Japan: Yamagata	Deltacoronavirus	Buldecovirus	Coronavirus HKU15	25362	Sus scrofa	Sus	scrofa	Pigs	2014-12-01	Porcine deltacoronavirus genomic RNA, complete genome, strain: YMG/JPN/2014		Sus scrofa domesticus	tan2023
OK662398.1	Finland	Alphacoronavirus	Duvinacovirus	Human coronavirus 229E	27317	Homo sapiens	Homo	sapiens	Humans	2021-01-01	Human coronavirus 229E strain TKU-2021B, complete genome		Homo sapiens	tan2023
LC494169.1	Japan	Betacoronavirus	Embecovirus	Betacoronavirus 1	30945	Bovinae			Bovines	2009-03-01	Bovine coronavirus TCG-14 RNA, complete genome		bovine coronavirus tcg-14 rna, complete genome	tan2023
OL770288.1	Australia	Betacoronavirus	Embecovirus	Betacoronavirus 1	30665	Homo sapiens	Homo	sapiens	Humans	2019-01-01	Human coronavirus OC43 isolate HCoV-OC43/09-83/QLD/AU/2019, complete genome	blood	Homo sapiens	tan2023
AY485278.1		Betacoronavirus	Sarbecovirus	Severe acute respiratory syndrome-related coronavirus	29740						SARS coronavirus Sino3-11, complete genome		sars coronavirus sino3-11, complete genome	tan2023
AY283796.1	Singapore	Betacoronavirus	Sarbecovirus	Severe acute respiratory syndrome-related coronavirus	29711						SARS coronavirus Sin2679, complete genome		sars coronavirus sin2679, complete genome	tan2023
MW591993.2	Malaysia	Alphacoronavirus	Tegacovirus	Alphacoronavirus 1	29088	Homo sapiens	Homo	sapiens	Humans	2017-01-01	Canine coronavirus isolate CCoV-HuPn-2018, complete genome	nasopharyngeal swab from an infant with pneumonia	Homo sapiens	tan2023
MZ325297.1	Cameroon	Gammacoronavirus	Igacovirus	Avian coronavirus	27671	Gallus gallus	Gallus	gallus	Birds	2013-01-01	Avian coronavirus strain D2326/4/13/CM, complete genome		Gallus gallus	tan2023
KF514407.1	USA: Nashville, TN	Betacoronavirus	Sarbecovirus	Severe acute respiratory syndrome-related coronavirus	29689					2010-10-01	SARS coronavirus ExoN1 strain SARS/VeroE6_lab/USA/ExoN1_c5.7P20/2010, complete genome		sars coronavirus exon1 strain sars/veroe6_lab/usa/exon1_c5.7p20/2010, complete genome	tan2023
KF514432.1	USA: Nashville, TN	Alphacoronavirus	Duvinacovirus	Human coronavirus 229E	27138	Homo sapiens	Homo	sapiens	Humans	1993-02-22	Human coronavirus 229E strain 229E/human/USA/932-72/1993, complete genome		Homo sapiens; sex: F; age: 8Y	tan2023
HG994859.1		Betacoronavirus	Sarbecovirus	Severe acute respiratory syndrome-related coronavirus	29903						Severe acute respiratory syndrome-related coronavirus isolate H_SC_10 genome assembly, complete genome: monopartite		severe acute respiratory syndrome-related coronavirus isolate h_sc_10 genome assembly, complete genome: monopartite	tan2023
MK651076.1	China	Alphacoronavirus	Rhinacovirus	Swine acute diarrhea syndrome coronavirus	27163	Sus scrofa	Sus	scrofa	Pigs	2019-02-01	Swine acute diarrhea syndrome coronavirus strain GDLX/2019, complete genome		Sus scrofa	tan2023
MW719567.1	United Kingdom	Betacoronavirus	Sarbecovirus	Sarbecovirus RhGB01	29324	Rhinolophus hipposideros	Rhinolophus	hipposideros	Bats	2020-09-18	Sarbecovirus RhGB01, complete genome		Rhinolophus hipposideros	tan2023
OL542832.1	South Korea	Betacoronavirus	Embecovirus	Betacoronavirus 1	29982	Sus scrofa	Sus	scrofa	Pigs	2021-01-01	Porcine hemagglutinating encephalomyelitis virus isolate GNU-2113, complete genome		Sus scrofa	tan2023
MW847253.1	Germany	Gammacoronavirus	Igacovirus	Avian coronavirus	27608	Gallus gallus	Gallus	gallus	Birds		Avian coronavirus isolate Beaudette-FU, complete genome		Gallus gallus	tan2023
MW248736.1	Netherlands	Alphacoronavirus	Minacovirus	Minacovirus mink/NLD/2020/NT_4	28868	Neogale vison	Neogale	vison	Mustelids	2020-05-05	MAG: Minacovirus mink/NLD/2020/NT_4, complete genome	feces	Neovison vison (mink)	tan2023
FJ647219.1	USA: Pennsylvania	Betacoronavirus	Embecovirus	Murine coronavirus	31427	Mus musculus	Mus	musculus	Rodents		Murine coronavirus RJHM/A, complete genome		Mus musculus	tan2023
KF530061.1	USA: Nashville, TN	Betacoronavirus	Embecovirus	Betacoronavirus 1	30577	Homo sapiens	Homo	sapiens	Humans	1990-01-19	Human coronavirus OC43 strain OC43/human/USA/901-43/1990, complete genome		Homo sapiens; sex: F; age: 43Y	tan2023
FJ882962.1	USA: Tennessee	Betacoronavirus	Sarbecovirus	Severe acute respiratory syndrome-related coronavirus	29721					2008-12-18	SARS coronavirus MA15 ExoN1 isolate P3pp10, complete genome		sars coronavirus ma15 exon1 isolate p3pp10, complete genome	tan2023
KF906249.1	United Arab Emirates: Dubai	Betacoronavirus	Embecovirus	Betacoronavirus 1	31052	Camelus	Camelus		Camelids	2013-04-03	Dromedary camel coronavirus HKU23 strain HKU23-265F, complete genome		dromedary camel	tan2023
KF923923.1	China: Beijing	Betacoronavirus	Embecovirus	Betacoronavirus 1	30713	Homo sapiens	Homo	sapiens	Humans	2008-10-01	Human coronavirus OC43 isolate 892A/2008, complete genome	nasopharyngeal aspirate	Homo sapiens	tan2023
JQ989272.1	Hong Kong	Alphacoronavirus	Decacovirus	Bat coronavirus HKU10	28483	Chiroptera			Bats	2010-08-01	Hipposideros bat coronavirus HKU10 isolate TLC1343A, complete genome		bat	tan2023
KF268339.1	USA: Philadelphia	Betacoronavirus	Embecovirus	Murine coronavirus	31283	Mus musculus	Mus	musculus	Rodents	2012-10-25	Murine coronavirus strain MHV/BHKR_lab/USA/icA59_ns2M/2012, complete genome		Mus musculus	tan2023
FJ425185.1	USA: Ohio	Betacoronavirus	Embecovirus	Betacoronavirus 1	30940	Bovidae			Bovids	1994-01-01	Waterbuck coronavirus US/OH-WD358-GnC/1994, complete genome		waterbuck	tan2023
MW351624.1	China	Gammacoronavirus	Igacovirus	Avian coronavirus	27692	Aves			Birds	2019-01-01	Avian coronavirus isolate IBV-rSD-H223A, complete genome		chicken	tan2023
AP006559.1		Betacoronavirus	Sarbecovirus	Severe acute respiratory syndrome-related coronavirus	29727						SARS coronavirus TWK genomic RNA, complete genome	primary sample from patient #06 with severe acute respiratory syndrome (SARS)	sars coronavirus twk genomic rna, complete genome	tan2023
MZ081380.1	China	Betacoronavirus	Sarbecovirus	Betacoronavirus sp. RsYN04	29712	Rhinolophus stheno	Rhinolophus	stheno	Bats	2020-04-18	Betacoronavirus sp. RsYN04 strain bat/Yunnan/RsYN04/2020, complete genome	bat feces	Rhinolophus stheno	tan2023
KF530066.1	USA: Nashville, TN	Betacoronavirus	Embecovirus	Betacoronavirus 1	30564	Homo sapiens	Homo	sapiens	Humans	1990-01-16	Human coronavirus OC43 strain OC43/human/USA/901-33/1990, complete genome		Homo sapiens; sex: M; age: 12Y	tan2023
KP143510.1	United Kingdom	Alphacoronavirus	Tegacovirus	Alphacoronavirus 1	28967	Felis catus	Felis	catus	Felines	2013-01-01	Feline coronavirus isolate 67F, complete genome		Felis catus	tan2023
KR265863.1	USA: Ohio	Deltacoronavirus	Buldecovirus	Coronavirus HKU15	25394	Sus	Sus		Pigs	2014-03-27	Porcine deltacoronavirus strain USA/Ohio445/2014, complete genome		pig	tan2023
KY626044.1	Brazil	Gammacoronavirus	Igacovirus	Avian coronavirus	27618	Aves			Birds	2016-01-01	Avian coronavirus strain BR-I, complete genome		avian coronavirus strain br-i, complete genome	tan2023
KY419112.1	USA	Betacoronavirus	Embecovirus	Betacoronavirus 1	30531	Sus scrofa	Sus	scrofa	Pigs	2015-08-01	Porcine hemagglutinating encephalomyelitis virus strain PHEV-CoV/swine/USA/15TOSU1765/2015, complete genome	nasal swab	Sus scrofa scrofa	tan2023
KX964649.1	China	Alphacoronavirus	Luchacovirus	Coronavirus AcCoV-JC34	27682	Apodemus chevrieri	Apodemus	chevrieri	Rodents	2011-10-01	Coronavirus AcCoV-JC34, complete genome		Apodemus chevrieri	tan2023
LC061273.1	Japan: Hokkaido, Obihiro	Betacoronavirus	Embecovirus	Betacoronavirus 1	30916	Equus caballus	Equus	caballus	Equines	2012-01-01	Equine coronavirus RNA, complete genome, strain: Obihiro12-1		Equus caballus adult	tan2023
MF642325.1	China	Deltacoronavirus	Buldecovirus	Coronavirus HKU15	25420	Sus	Sus		Pigs	2017-03-01	Porcine deltacoronavirus strain CHN/QH/2017/1, complete genome	feces	Tibetan pig	tan2023
AY559097.1	Singapore	Betacoronavirus	Sarbecovirus	Severe acute respiratory syndrome-related coronavirus	29715						SARS coronavirus Sin3408L, complete genome		sars coronavirus sin3408l, complete genome	tan2023
MT984587.1	Romania	Gammacoronavirus	Igacovirus	Avian coronavirus	27598	Gallus gallus	Gallus	gallus	Birds	2010-01-01	Avian coronavirus strain D1530/4/1/2010/RO, complete genome		Gallus gallus	tan2023
MN520199.1	China: Anhui	Deltacoronavirus	Buldecovirus	Coronavirus HKU15	25397	Sus	Sus		Pigs	2018-01-01	UNVERIFIED: Porcine deltacoronavirus isolate AH2018-93, complete genome		unverified: porcine deltacoronavirus isolate ah2018-93, complete genome	tan2023
KF923904.1	China: Beijing	Betacoronavirus	Embecovirus	Betacoronavirus 1	30713	Homo sapiens	Homo	sapiens	Humans	2012-05-01	Human coronavirus OC43 isolate 12694/2012, complete genome	nasal and throat swab	Homo sapiens	tan2023
FJ882957.1	USA: Tennessee	Betacoronavirus	Sarbecovirus	Severe acute respiratory syndrome-related coronavirus	29720					2008-11-25	SARS coronavirus MA15, complete genome		sars coronavirus ma15, complete genome	tan2023
KX900406.1	USA: Illinois	Alphacoronavirus	Tegacovirus	Alphacoronavirus 1	28521	Sus	Sus		Pigs	2013-02-28	Transmissible gastroenteritis virus strain TGEV/USA/Illinois149/2013, complete genome	feces	transmissible gastroenteritis virus strain tgev/usa/illinois149/2013, complete genome	tan2023
MZ293743.1	Uganda	Unknown	Unknown	Mouse coronavirus	31053	Mus bufo	Mus	bufo	Rodents	2013-09-22	Mouse coronavirus isolate PREDICT/PDF-2560, complete genome	blood	Mus bufo	tan2023
MF769422.1	China	Alphacoronavirus	Rhinacovirus	Swine acute diarrhea syndrome coronavirus	27173	Sus	Sus		Pigs	2017-01-01	Swine acute diarrhea syndrome coronavirus isolate 203, complete genome		swine	tan2023
KF530114.1	USA: Nashville, TN	Alphacoronavirus	Setracovirus	Human coronavirus NL63	27410	Homo sapiens	Homo	sapiens	Humans	1989-01-03	Human coronavirus NL63 strain NL63/human/USA/891-4/1989, complete genome		Homo sapiens; sex: F; age: 15Y	tan2023
MZ213844.1	USA: Minnesota	Betacoronavirus	Sarbecovirus	Severe acute respiratory syndrome-related coronavirus	29883	Homo sapiens	Homo	sapiens	Humans	2021-04-13	Severe acute respiratory syndrome coronavirus 2 isolate SARS-CoV-2/human/USA/MN-CDC-ASC210069024/2021, complete genome	Nasal - Anterior Nares	Homo sapiens	tan2023
JQ173883.1		Betacoronavirus	Embecovirus	Murine coronavirus	31161	Murinae			Rodents		Murine hepatitis virus strain S/3239-17, complete genome		murine hepatitis virus strain s/3239-17, complete genome	tan2023
MF542265.1	Haiti	Alphacoronavirus	Duvinacovirus	Human coronavirus 229E	27271	Homo sapiens	Homo	sapiens	Humans	2016-03-01	Human coronavirus 229E strain 229E/Haiti-1/2016, complete genome	plasma	Homo sapiens	tan2023
MG987421.1	China	Betacoronavirus	Merbecovirus	Middle East respiratory syndrome-related coronavirus	30483	Ia io	Ia	io	Bats	2014-05-08	Middle East respiratory syndrome-related coronavirus isolate NL140455, complete genome		Ia io	tan2023
DQ182595.1	China: Hangzhou	Betacoronavirus	Sarbecovirus	Severe acute respiratory syndrome-related coronavirus	29706					2003-04-21	SARS coronavirus ZJ0301 from China, complete genome	cultured virus in Vero cell inoculated with throat swab from the first patient with severe acute respiratory syndrome (SARS) in Zhejiang	sars coronavirus zj0301 from china, complete genome	tan2023
DQ415910.1	China: Hong Kong	Betacoronavirus	Embecovirus	Human coronavirus HKU1	29797	Homo	Homo		Humans		Human coronavirus HKU1 strain N14 genotype A, complete genome	nasopharyngeal aspirates of patients diagnosed respiratory tract infection diseases	human coronavirus hku1 strain n14 genotype a, complete genome	tan2023
MH687936.1	Viet Nam	Alphacoronavirus	Unknown	Alphacoronavirus sp.	28181	Scotophilus kuhlii	Scotophilus	kuhlii	Bats	2014-06-17	Alphacoronavirus sp. strain VZ_AlphaCoV_16715_31, complete genome		Scotophilus kuhlii	tan2023
MF374984.1	USA: Albuquerque, New Mexico	Betacoronavirus	Embecovirus	Betacoronavirus 1	30713	Homo sapiens	Homo	sapiens	Humans	2017-01-03	Human coronavirus OC43 isolate HCoV-OC43/USA/TCNP_00204/2017, complete genome	nasopharyngeal swab	Homo sapiens	tan2023
KT368824.1	Saudi Arabia	Betacoronavirus	Merbecovirus	Middle East respiratory syndrome-related coronavirus	30115	Camelus	Camelus		Camelids	2014-05-01	Middle East respiratory syndrome coronavirus isolate camel/Jeddah/F13A/2014, complete genome		camel	tan2023
DQ811784.2		Betacoronavirus	Embecovirus	Betacoronavirus 1	31007	Bovinae			Bovines	1983-01-01	Bovine coronavirus DB2, complete genome		bovine	tan2023
KF923893.1	China: Beijing	Betacoronavirus	Embecovirus	Betacoronavirus 1	30713	Homo sapiens	Homo	sapiens	Humans	2010-07-01	Human coronavirus OC43 isolate 2151A/2010, complete genome	nasopharyngeal aspirate	Homo sapiens	tan2023
OM572913.1	USA: Michigan	Betacoronavirus	Sarbecovirus	Severe acute respiratory syndrome-related coronavirus	29795	Homo sapiens	Homo	sapiens	Humans	2022-01-26	Severe acute respiratory syndrome coronavirus 2 isolate SARS-CoV-2/human/USA/MI-CDC-FG-256662/2022, complete genome	nasal swab	Homo sapiens	tan2023
KF923887.1	China: Beijing	Betacoronavirus	Embecovirus	Betacoronavirus 1	30719	Homo sapiens	Homo	sapiens	Humans	2010-04-01	Human coronavirus OC43 isolate 1997A/2010, complete genome	nasopharyngeal aspirate	Homo sapiens	tan2023
MN690609.1	USA	Gammacoronavirus	Cegacovirus	Bottlenose dolphin coronavirus	31728	Tursiops	Tursiops		Cetaceans		Bottlenose dolphin coronavirus strain 37112-2, complete genome	feces	bottlenose dolphin	tan2023
EF424620.1	USA:Ohio	Betacoronavirus	Embecovirus	Betacoronavirus 1	30964	Bovinae			Bovines		Bovine coronavirus R-AH187, complete genome		bovine	tan2023
MW206198.1	USA	Betacoronavirus	Sarbecovirus	Severe acute respiratory syndrome-related coronavirus	29781	Homo sapiens	Homo	sapiens	Humans	2020-05-11	Severe acute respiratory syndrome coronavirus 2 isolate SARS-CoV-2/human/USA/UT-UPHL-2009058/2020, complete genome		Homo sapiens	tan2023
HQ890535.1	USA: Nashville, TN	Betacoronavirus	Sarbecovirus	Severe acute respiratory syndrome-related coronavirus	29646	Mus musculus	Mus	musculus	Rodents	2008-09-17	SARS coronavirus MA15 ExoN1 isolate d2om2, complete genome		Mus musculus; old	tan2023
DQ201447.1		Alphacoronavirus	Tegacovirus	Alphacoronavirus 1	28548	Sus	Sus		Pigs		Transmissible gastroenteritis virus strain TS, complete genome		pig	tan2023
KX258195.1	Brazil	Gammacoronavirus	Igacovirus	Avian coronavirus	27615	Gallus gallus	Gallus	gallus	Birds	2013-01-01	Avian coronavirus isolate 23/2013, complete genome	kidney	Gallus gallus	tan2023
MG428706.1	Kenya	Alphacoronavirus	Setracovirus	Human coronavirus NL63	27637	Homo sapiens	Homo	sapiens	Humans	2010-05-24	Human coronavirus NL63 isolate Kilifi_HH_3808_24-May-2010, complete genome		Homo sapiens	tan2023
JQ065048.1	China: Hong Kong	Deltacoronavirus	Andecovirus	Wigeon coronavirus HKU20	26227	Anatidae			Birds	2008-01-01	Wigeon coronavirus HKU20 strain HKU20-9243, complete genome		wigeon	tan2023
EF424623.1	USA:Ohio	Betacoronavirus	Embecovirus	Betacoronavirus 1	31002	Giraffa	Giraffa		Giraffids		Giraffe coronavirus US/OH3/2003, complete genome		giraffe	tan2023
LC494147.1	Japan	Betacoronavirus	Embecovirus	Betacoronavirus 1	30944	Bovinae			Bovines	2016-11-01	Bovine coronavirus IWT-17 RNA, complete genome		bovine coronavirus iwt-17 rna, complete genome	tan2023
EF203067.1		Alphacoronavirus	Rhinacovirus	Rhinolophus bat coronavirus HKU2	27164	Chiroptera			Bats		Bat coronavirus HKU2 strain HKU2/HK/33/2006, complete genome		bat coronavirus hku2 strain hku2/hk/33/2006, complete genome	tan2023
MZ218052.1	Denmark: Moensted	Unknown	Unknown	Bat coronavirus	28092	Myotis daubentonii	Myotis	daubentonii	Bats	2015-11-01	MAG: Bat coronavirus isolate BtCoV/21164-6-alt/M.dau/DK/2015, complete genome	feces	Myotis daubentonii	tan2023
MT361640.1		Betacoronavirus	Merbecovirus	Middle East respiratory syndrome-related coronavirus	30136						Mutant Middle East respiratory syndrome-related coronavirus clone MERS-CoV YKC, complete genome		mutant middle east respiratory syndrome-related coronavirus clone mers-cov ykc, complete genome	tan2023
OK017828.1	China: Guangdong	Betacoronavirus	Sarbecovirus	Sarbecovirus sp.	29550	Rhinolophus sinicus	Rhinolophus	sinicus	Bats	2019-09-01	Sarbecovirus sp. isolate GD2019E, complete genome		Rhinolophus sinicus	tan2023
MK005882.1	China	Deltacoronavirus	Buldecovirus	Coronavirus HKU15	25414	Sus	Sus		Pigs	2018-03-01	Porcine deltacoronavirus strain Swine/CHN/SC/2018/1, complete genome	small intestine	porcine	tan2023
MZ293739.1	Rwanda	Betacoronavirus	Nobecovirus	Rousettus bat coronavirus GCCDC1	29125	Rousettus aegyptiacus	Rousettus	aegyptiacus	Bats	2013-05-10	Rousettus bat coronavirus isolate PREDICT/GCS-242, complete genome	rectal swab	Rousettus aegyptiacus	tan2023
MH687958.1	Viet Nam	Alphacoronavirus	Unknown	Alphacoronavirus sp.	28036	Scotophilus kuhlii	Scotophilus	kuhlii	Bats	2014-09-18	Alphacoronavirus sp. strain VZ_AlphaCoV_16845_87, complete genome		Scotophilus kuhlii	tan2023
KX982264.1	France	Betacoronavirus	Embecovirus	Betacoronavirus 1	30847	Bos taurus	Bos	taurus	Bovines	2014-03-04	Bovine coronavirus isolate BCoV_2014_13, complete genome	feces	Bos taurus	tan2023
MZ772936.1	China	Deltacoronavirus	Buldecovirus	Coronavirus HKU15	25416	Sus	Sus		Pigs	2016-01-01	Porcine deltacoronavirus isolate BN, complete genome	intestinal contents	pig	tan2023
OK662397.1	Finland	Betacoronavirus	Embecovirus	Betacoronavirus 1	30731	Homo sapiens	Homo	sapiens	Humans	2021-01-01	Human coronavirus OC43 strain TKU-2021A, complete genome		Homo sapiens	tan2023
KY419107.1	USA	Betacoronavirus	Embecovirus	Betacoronavirus 1	29866	Sus scrofa	Sus	scrofa	Pigs	2015-07-25	Porcine hemagglutinating encephalomyelitis virus strain PHEV-CoV/swine/USA/15TOSU1209/2015, complete genome	nasal swab	Sus scrofa scrofa	tan2023
AY502924.1	Taiwan	Betacoronavirus	Sarbecovirus	Severe acute respiratory syndrome-related coronavirus	29727						SARS coronavirus TW11, complete genome		sars coronavirus tw11, complete genome	tan2023
KC461236.1	USA	Alphacoronavirus	Tegacovirus	Alphacoronavirus 1	29357	Felis catus	Felis	catus	Felines	2011-01-01	Feline infectious peritonitis virus isolate FCoVWSU791146_P8, complete genome		Felis catus	tan2023
AY278741.1		Betacoronavirus	Sarbecovirus	Severe acute respiratory syndrome-related coronavirus	29727						SARS coronavirus Urbani, complete genome		sars coronavirus urbani, complete genome	tan2023
OL901020.1	USA	Betacoronavirus	Sarbecovirus	Severe acute respiratory syndrome-related coronavirus	29769	Homo sapiens	Homo	sapiens	Humans	2021-11-16	Severe acute respiratory syndrome coronavirus 2 isolate SARS-CoV-2/human/USA/CO-CDPHE-2102269028/2021, complete genome	patient isolate	Homo sapiens	tan2023
AY283798.2	Singapore	Betacoronavirus	Sarbecovirus	Severe acute respiratory syndrome-related coronavirus	29711						SARS coronavirus Sin2774, complete genome		sars coronavirus sin2774, complete genome	tan2023
LC494176.1	Japan	Betacoronavirus	Embecovirus	Betacoronavirus 1	30945	Bovinae			Bovines	2016-01-01	Bovine coronavirus TCG-17 RNA, complete genome		bovine coronavirus tcg-17 rna, complete genome	tan2023
AY345987.1		Betacoronavirus	Sarbecovirus	Severe acute respiratory syndrome-related coronavirus	29736						SARS coronavirus CUHK-AG02, complete genome	patient 2 of the Amoy Gardens cohort	sars coronavirus cuhk-ag02, complete genome	tan2023
LC654446.1	Japan: Fukushima	Alphacoronavirus	Duvinacovirus	Human coronavirus 229E	27267	Homo sapiens	Homo	sapiens	Humans	2020-01-01	Human coronavirus 229E Fukushima_H832_2020 RNA, complete genome		Homo sapiens	tan2023
FJ882940.1	USA: Tennessee	Betacoronavirus	Sarbecovirus	Severe acute respiratory syndrome-related coronavirus	29646					2008-08-06	SARS coronavirus ExoN1 isolate P3pp37, complete genome		sars coronavirus exon1 isolate p3pp37, complete genome	tan2023
OL311152.1	China: Yunnan province	Deltacoronavirus	Unknown	Deltacoronavirus sp.	26159	Chroicocephalus ridibundus	Chroicocephalus	ridibundus	Birds	2021-03-03	Deltacoronavirus sp. isolate HNU4-3, complete genome		Chroicocephalus ridibundus	tan2023
OK017811.1	China: Fujian	Betacoronavirus	Sarbecovirus	Sarbecovirus sp.	29454	Rhinolophus sinicus	Rhinolophus	sinicus	Bats	2021-05-01	Sarbecovirus sp. isolate FJ2021M, complete genome		Rhinolophus sinicus	tan2023
MN611521.1	China	Alphacoronavirus	Pedacovirus	Scotophilus kuhlii bat coronavirus 512-related	27933	Scotophilus kuhlii	Scotophilus	kuhlii	Bats	2018-03-01	Scotophilus kuhlii bat coronavirus 512-related isolate HK140714, complete genome		Scotophilus kuhlii	tan2023
MK359104.1	China	Deltacoronavirus	Buldecovirus	Coronavirus HKU15	25406	Sus	Sus		Pigs	2018-01-01	Porcine deltacoronavirus isolate CHN-GX01-2018, complete genome		pig	tan2023
KX900405.1	USA: Minnesota	Alphacoronavirus	Tegacovirus	Alphacoronavirus 1	28521	Sus	Sus		Pigs	2013-01-04	Transmissible gastroenteritis virus strain TGEV/USA/Minnesota148/2013, complete genome	feces	transmissible gastroenteritis virus strain tgev/usa/minnesota148/2013, complete genome	tan2023
MZ328299.1	China	Alphacoronavirus	Unknown	Jingmen Miniopterus schreibersii alphacoronavirus 1	28041	Miniopterus schreibersii	Miniopterus	schreibersii	Bats	2016-01-01	Jingmen Miniopterus schreibersii alphacoronavirus 1, complete genome		Miniopterus schreibersii	tan2023
EF065513.1	China: Guangdong province	Betacoronavirus	Nobecovirus	Rousettus bat coronavirus HKU9	29114	Chiroptera			Bats		Rousettus bat coronavirus HKU9, complete genome		bat	tan2023
KT368900.1	Saudi Arabia	Alphacoronavirus	Duvinacovirus	Human coronavirus 229E	27390	Camelus	Camelus		Camelids	2014-11-01	Camel alphacoronavirus isolate camel/Jeddah/N62(a)/2014, complete genome		camel	tan2023
KT368914.1	Saudi Arabia	Alphacoronavirus	Duvinacovirus	Human coronavirus 229E	27392	Camelus	Camelus		Camelids	2015-04-01	Camel alphacoronavirus isolate camel/Taif/T96/2015, complete genome		camel	tan2023
KT368910.1	Saudi Arabia	Alphacoronavirus	Duvinacovirus	Human coronavirus 229E	27387	Camelus	Camelus		Camelids	2015-01-01	Camel alphacoronavirus isolate camel/Jeddah/Jd6(a)/2015, complete genome		camel	tan2023
KP757892.1	China	Deltacoronavirus	Buldecovirus	Coronavirus HKU15	25420	Sus	Sus		Pigs	2014-12-20	Porcine deltacoronavirus isolate CHN-JS-2014, complete genome	pig feces	pig	tan2023
MW532110.1	China	Betacoronavirus	Embecovirus	Betacoronavirus 1	30677	Homo sapiens	Homo	sapiens	Humans	2009-06-09	Human coronavirus OC43 strain OC43/China/02/2009, complete genome	nasopharyngeal swab	Homo sapiens	tan2023
AB691767.2	Japan: Niigata	Alphacoronavirus	Duvinacovirus	Human coronavirus 229E	27252	Homo sapiens	Homo	sapiens	Humans	2008-01-01	Human coronavirus 229E Niigata/01/08 RNA, complete genome	pharyngeal swab using CaCO2 cells in the presence of trypsin	Homo sapiens	tan2023
MF598663.1	United Arab Emirates	Betacoronavirus	Merbecovirus	Middle East respiratory syndrome-related coronavirus	30123	Camelus dromedarius	Camelus	dromedarius	Camelids	2015-03-01	Middle East respiratory syndrome-related coronavirus strain camel/UAE_B73_2015, complete genome	nasopharyngeal swab	Camelus dromedarius	tan2023
OK017816.1	China: Guangdong	Betacoronavirus	Sarbecovirus	Sarbecovirus sp.	29550	Rhinolophus sinicus	Rhinolophus	sinicus	Bats	2017-09-01	Sarbecovirus sp. isolate GD2017J, complete genome		Rhinolophus sinicus	tan2023
MW202337.1	USA	Alphacoronavirus	Setracovirus	Human coronavirus NL63	27545	Homo sapiens	Homo	sapiens	Humans	2018-01-01	MAG: Human coronavirus NL63 isolate NL63_S170, complete genome		Homo sapiens	tan2023
MN692770.1	Spain	Alphacoronavirus	Tegacovirus	Alphacoronavirus 1	28094	Sus	Sus		Pigs	2014-05-30	Swine enteric coronavirus isolate SeCoV-1480-Murcia-Lorca, complete genome		swine	tan2023
KY419103.1	USA	Betacoronavirus	Embecovirus	Betacoronavirus 1	30632	Sus scrofa	Sus	scrofa	Pigs	2015-09-15	Porcine hemagglutinating encephalomyelitis virus strain PHEV-CoV/swine/USA/15TOSU25049/2015, complete genome	nasal swab	Sus scrofa scrofa	tan2023
MK334045.1	China	Alphacoronavirus	Setracovirus	Human coronavirus NL63	27544	Homo sapiens	Homo	sapiens	Humans	2018-08-14	Human coronavirus NL63 strain ChinaGD05, complete genome	nasopharyngeal swab	Homo sapiens	tan2023
MZ245578.1	USA	Betacoronavirus	Sarbecovirus	Severe acute respiratory syndrome-related coronavirus	29798	Homo sapiens	Homo	sapiens	Humans	2020-12-03	Severe acute respiratory syndrome coronavirus 2 isolate SARS-CoV-2/human/USA/TX-CDC-4061539-001/2020, complete genome	nasopharyngeal swab	Homo sapiens	tan2023
JQ989267.1	Hong Kong	Alphacoronavirus	Decacovirus	Bat coronavirus HKU10	28483	Chiroptera			Bats	2006-12-01	Hipposideros bat coronavirus HKU10 isolate SL12A, complete genome		bat	tan2023
MG916903.1	China	Unknown	Unknown	Bat coronavirus	29076	Chiroptera			Bats	2013-04-17	Bat coronavirus isolate BtCoV/Rh/YN2012_Rs4259, complete genome		bat coronavirus isolate btcov/rh/yn2012_rs4259, complete genome	tan2023
OW505209.1	United Kingdom:England	Betacoronavirus	Sarbecovirus	Severe acute respiratory syndrome-related coronavirus	29850	Homo sapiens	Homo	sapiens	Humans	2022-03-08	Severe acute respiratory syndrome coronavirus 2 genome assembly, complete genome: monopartite		Homo sapiens	tan2023
MT040334.1	China	Betacoronavirus	Sarbecovirus	Pangolin coronavirus	29801	Manis javanica	Manis	javanica	Pangolins	2017-01-01	Pangolin coronavirus isolate PCoV_GX-P1E, complete genome		Manis javanica (Malayan pangolin)	tan2023
KY292377.1	China	Alphacoronavirus	Tegacovirus	Alphacoronavirus 1	29303	Felis	Felis		Felines	2016-10-01	Feline coronavirus strain HLJ/DQ/2016/01, complete genome	ascites	cat	tan2023
KF514391.1	USA: Nashville, TN	Betacoronavirus	Sarbecovirus	Severe acute respiratory syndrome-related coronavirus	29687					2010-10-01	SARS coronavirus ExoN1 strain SARS/VeroE6_lab/USA/ExoN1_c5.9P20/2010, complete genome		sars coronavirus exon1 strain sars/veroe6_lab/usa/exon1_c5.9p20/2010, complete genome	tan2023
KX722530.1	Denmark	Alphacoronavirus	Tegacovirus	Alphacoronavirus 1	28595	Felis catus	Felis	catus	Felines	2015-02-01	Feline coronavirus isolate Cat 1 Karlslunde, complete genome	lung	Felis catus	tan2023
MK355396.1	China: Sichuan	Deltacoronavirus	Buldecovirus	Coronavirus HKU15	25403	Sus scrofa	Sus	scrofa	Pigs	2016-02-20	Porcine deltacoronavirus strain CHN-SC2015, complete genome	feces	Sus scrofa	tan2023
KT368904.1	Saudi Arabia	Alphacoronavirus	Duvinacovirus	Human coronavirus 229E	27395	Camelus	Camelus		Camelids	2014-12-01	Camel alphacoronavirus isolate camel/Jeddah/D43(a)/2014, complete genome		camel	tan2023
KU981059.1	China	Deltacoronavirus	Buldecovirus	Coronavirus HKU15	25420	Suidae			unknown	2015-02-16	Porcine deltacoronavirus strain NH, complete genome	small intestinal contents	piglet	tan2023
MH687967.1	Viet Nam	Alphacoronavirus	Unknown	Alphacoronavirus sp.	27726	Scotophilus kuhlii	Scotophilus	kuhlii	Bats	2015-02-06	Alphacoronavirus sp. strain VZ_AlphaCoV_20745_8, complete genome		Scotophilus kuhlii	tan2023
HQ890530.1	USA: Nashville, TN	Betacoronavirus	Sarbecovirus	Severe acute respiratory syndrome-related coronavirus	29646	Mus musculus	Mus	musculus	Rodents	2008-10-08	SARS coronavirus MA15 ExoN1 isolate d2ym5, complete genome		Mus musculus; young	tan2023
KX022602.1	USA: Iowa	Deltacoronavirus	Buldecovirus	Coronavirus HKU15	25382	Sus	Sus		Pigs	2015-10-15	Porcine deltacoronavirus strain PDCoV/USA/Iowa136/2015, complete genome	feces	pig	tan2023
KT368898.1	Saudi Arabia	Alphacoronavirus	Duvinacovirus	Human coronavirus 229E	27395	Camelus	Camelus		Camelids	2014-11-01	Camel alphacoronavirus isolate camel/Jeddah/N38/2014, complete genome		camel	tan2023
KF430201.1	USA: Denver, CO	Betacoronavirus	Embecovirus	Human coronavirus HKU1	29934	Homo sapiens	Homo	sapiens	Humans	2010-01-22	Human coronavirus HKU1 strain HKU1/human/USA/HKU1-18/2010, complete genome		Homo sapiens; F; 2M	tan2023
KY419109.1	USA	Betacoronavirus	Embecovirus	Betacoronavirus 1	29906	Sus scrofa	Sus	scrofa	Pigs	2015-08-01	Porcine hemagglutinating encephalomyelitis virus strain PHEV-CoV/swine/USA/15TOSU1655/2015, complete genome	nasal swab	Sus scrofa scrofa	tan2023
AY686863.1		Betacoronavirus	Sarbecovirus	Severe acute respiratory syndrome-related coronavirus	29499						SARS coronavirus A022, complete genome	palm civet	sars coronavirus a022, complete genome	tan2023
JN634064.1		Alphacoronavirus	Tegacovirus	Alphacoronavirus 1	28984	Felinae			Felines		Feline coronavirus strain WSU 79-1683, complete genome		feline coronavirus strain wsu 79-1683, complete genome	tan2023
KJ473820.1	China	Betacoronavirus	Merbecovirus	Pipistrellus bat coronavirus HKU5	30480	Pipistrellus abramus	Pipistrellus	abramus	Bats	2013-01-01	BtPa-BetaCoV/GD2013, complete genome		Pipistrellus abramus	tan2023
KF514393.1	USA: Nashville, TN	Betacoronavirus	Sarbecovirus	Severe acute respiratory syndrome-related coronavirus	29687					2010-10-01	SARS coronavirus ExoN1 strain SARS/VeroE6_lab/USA/ExoN1_c5.10P20/2010, complete genome		sars coronavirus exon1 strain sars/veroe6_lab/usa/exon1_c5.10p20/2010, complete genome	tan2023
HQ890534.1	USA: Nashville, TN	Betacoronavirus	Sarbecovirus	Severe acute respiratory syndrome-related coronavirus	29646	Mus musculus	Mus	musculus	Rodents	2008-09-17	SARS coronavirus MA15 ExoN1 isolate d2om1, complete genome		Mus musculus; old	tan2023
LC494163.1	Japan	Betacoronavirus	Embecovirus	Betacoronavirus 1	30923	Bovinae			Bovines	2006-12-01	Bovine coronavirus TCG-2 RNA, complete genome		bovine coronavirus tcg-2 rna, complete genome	tan2023
OK017819.1	China: Guangdong	Betacoronavirus	Sarbecovirus	Sarbecovirus sp.	29537	Rhinolophus sinicus	Rhinolophus	sinicus	Bats	2017-09-01	Sarbecovirus sp. isolate GD2017M, complete genome		Rhinolophus sinicus	tan2023
EU371562.1		Betacoronavirus	Sarbecovirus	Severe acute respiratory syndrome-related coronavirus	29602						SARS coronavirus BJ182-4, complete genome		sars coronavirus bj182-4, complete genome	tan2023
OK546242.1	China	Deltacoronavirus	Buldecovirus	Coronavirus HKU15	25430	Sus	Sus		Pigs	2020-01-01	Porcine deltacoronavirus strain CZ2020, complete genome		pig	tan2023
KY369905.1	USA	Betacoronavirus	Embecovirus	Betacoronavirus 1	30581	Homo sapiens	Homo	sapiens	Humans	2016-01-01	Human coronavirus OC43 strain HCoV_OC43/Seattle/USA/SC831/2016, complete genome		Homo sapiens	tan2023
KX179500.1	USA	Alphacoronavirus	Setracovirus	Human coronavirus NL63	27553	Homo sapiens	Homo	sapiens	Humans	2015-09-01	Human coronavirus NL63 strain NL63/UF-2/2015, complete genome	nasopharyngeal swab	Homo sapiens	tan2023
MH687938.1	Viet Nam	Alphacoronavirus	Unknown	Alphacoronavirus sp.	28349	Scotophilus kuhlii	Scotophilus	kuhlii	Bats	2014-06-17	Alphacoronavirus sp. strain VZ_AlphaCoV_16715_39_c1, complete genome		Scotophilus kuhlii	tan2023
MT072864.1	China	Betacoronavirus	Sarbecovirus	Pangolin coronavirus	29795	Pholidota			Pangolins	2018-01-01	Pangolin coronavirus isolate PCoV_GX-P2V, complete genome		pangolin	tan2023
OK017838.1	China: Jiangxi	Betacoronavirus	Sarbecovirus	Sarbecovirus sp.	29482	Rhinolophus sinicus	Rhinolophus	sinicus	Bats	2021-07-01	Sarbecovirus sp. isolate JX2021G, complete genome		Rhinolophus sinicus	tan2023
MW559057.1	China	Betacoronavirus	Embecovirus	Betacoronavirus 1	30714	Homo sapiens	Homo	sapiens	Humans	2013-03-27	Human coronavirus OC43 isolate Guangzhou 201301, complete genome	throat swab from patient with upper respiratory infection	Homo sapiens	tan2023
OM912708.1	Mexico: Central	Gammacoronavirus	Igacovirus	Avian coronavirus	27577	Gallus gallus	Gallus	gallus	Birds	2021-12-15	Infectious bronchitis virus isolate IBV/ck/MEX/2961/21, complete genome	choanal cleft/lung swab; 21-day-old chicken	Gallus gallus domesticus (broiler); SEPRL-ID:2961	tan2023
KF530107.1	USA: Nashville, TN	Alphacoronavirus	Setracovirus	Human coronavirus NL63	27410	Homo sapiens	Homo	sapiens	Humans	1991-01-24	Human coronavirus NL63 strain NL63/human/USA/911-56/1991, complete genome		Homo sapiens; sex: F; age: 9Y	tan2023
KX236008.1	China	Gammacoronavirus	Igacovirus	Avian coronavirus	27687	Gallus gallus	Gallus	gallus	Birds	2013-01-01	Infectious bronchitis virus strain ck/CH/LDL/130325, complete genome		Gallus gallus	tan2023
MK720946.1	Hong Kong	Alphacoronavirus	Decacovirus	Rhinolophus bat coronavirus HKU32	29201	Rhinolophus sinicus	Rhinolophus	sinicus	Bats	2015-08-06	Rhinolophus bat coronavirus HKU32 strain TLC28A, complete genome	anal swab	Rhinolophus sinicus	tan2023
OM451122.1	China	Alphacoronavirus	Tegacovirus	Alphacoronavirus 1	29309	Canis	Canis		Canines	2021-01-01	MAG: Canine coronavirus isolate SD-F3, complete genome		Raccoon dog	tan2023
KF530113.1	USA: Nashville, TN	Alphacoronavirus	Setracovirus	Human coronavirus NL63	27410	Homo sapiens	Homo	sapiens	Humans	1990-05-29	Human coronavirus NL63 strain NL63/human/USA/905-25/1990, complete genome		Homo sapiens; sex: F; age: 19Y	tan2023
KJ958218.1	China: Beijing	Betacoronavirus	Embecovirus	Betacoronavirus 1	30714	Homo sapiens	Homo	sapiens	Humans	2011-10-03	Human coronavirus OC43 strain LY341, complete genome		Homo sapiens; sex:F; age:15Y	tan2023
KJ556336.1	Saudi Arabia	Betacoronavirus	Merbecovirus	Middle East respiratory syndrome-related coronavirus	29890	Homo sapiens	Homo	sapiens	Humans	2013-11-06	Middle East respiratory syndrome coronavirus isolate Jeddah_1_2013, complete genome		Homo sapiens	tan2023
KJ473813.1	China	Betacoronavirus	Sarbecovirus	Severe acute respiratory syndrome-related coronavirus	29461	Rhinolophus ferrumequinum	Rhinolophus	ferrumequinum	Bats	2013-01-01	BtRf-BetaCoV/SX2013, complete genome		Rhinolophus ferrumequinum	tan2023
MG197711.1	China	Betacoronavirus	Embecovirus	Betacoronavirus 1	30544	Homo	Homo		Humans	2015-06-09	Human coronavirus OC43 strain BJ-164, complete genome	throat swabs or nasopharyngeal aspirates	human coronavirus oc43 strain bj-164, complete genome	tan2023
MN520196.1	China: Shandong	Deltacoronavirus	Buldecovirus	Coronavirus HKU15	25404	Sus	Sus		Pigs	2018-03-01	UNVERIFIED: Porcine deltacoronavirus isolate SD2018-306, complete genome		unverified: porcine deltacoronavirus isolate sd2018-306, complete genome	tan2023
DQ415912.1	China: Hong Kong	Betacoronavirus	Embecovirus	Human coronavirus HKU1	29845	Homo	Homo		Humans		Human coronavirus HKU1 strain N16 genotype C, complete genome	nasopharyngeal aspirates of patients diagnosed respiratory tract infection diseases	human coronavirus hku1 strain n16 genotype c, complete genome	tan2023
LC494174.1	Japan	Betacoronavirus	Embecovirus	Betacoronavirus 1	30951	Bovinae			Bovines	2008-01-01	Bovine coronavirus TCG-8 RNA, complete genome		bovine coronavirus tcg-8 rna, complete genome	tan2023
LC687395.1	Japan: Fukushima	Alphacoronavirus	Setracovirus	Human coronavirus NL63	27543	Homo sapiens	Homo	sapiens	Humans	2018-01-01	Human coronavirus NL63 Fukushima_H486_2018 RNA, complete genome	nasopharyngeal swab	Homo sapiens	tan2023
KY363868.1	China	Deltacoronavirus	Buldecovirus	Coronavirus HKU15	25403	Sus	Sus		Pigs	2016-01-05	Porcine deltacoronavirus isolate CHN-GD16-05, complete genome		swine	tan2023
MF167434.1	China	Alphacoronavirus	Rhinacovirus	Rhinolophus bat coronavirus HKU2	27171	Sus	Sus		Pigs	2017-03-06	Porcine enteric alphacoronavirus GDS04, complete genome		porcine	tan2023
KJ473816.1	China	Betacoronavirus	Sarbecovirus	Severe acute respiratory syndrome-related coronavirus	29142	Rhinolophus sinicus	Rhinolophus	sinicus	Bats	2013-01-01	BtRs-BetaCoV/YN2013, complete genome		Rhinolophus sinicus	tan2023
KY926512.1	South Korea	Deltacoronavirus	Buldecovirus	Coronavirus HKU15	25419	Sus	Sus		Pigs	2016-11-01	Porcine deltacoronavirus isolate KNU16-11, complete genome	feces	pig	tan2023
AY345986.1		Betacoronavirus	Sarbecovirus	Severe acute respiratory syndrome-related coronavirus	29736						SARS coronavirus CUHK-AG01, complete genome	patient 1 of the Amoy Gardens cohort	sars coronavirus cuhk-ag01, complete genome	tan2023
FJ415324.1	Germany	Betacoronavirus	Embecovirus	Betacoronavirus 1	31029	Homo sapiens	Homo	sapiens	Humans	1988-01-01	Human enteric coronavirus 4408, complete genome		Homo sapiens	tan2023
KY674942.1	USA	Betacoronavirus	Embecovirus	Human coronavirus HKU1	29893	Homo sapiens	Homo	sapiens	Humans	2016-01-01	Human coronavirus HKU1 strain N09-1627B, complete genome		Homo sapiens	tan2023
KR265851.1	USA: Indiana	Deltacoronavirus	Buldecovirus	Coronavirus HKU15	25394	Sus	Sus		Pigs	2014-05-13	Porcine deltacoronavirus strain USA/Indiana453/2014, complete genome		pig	tan2023
MT438697.1	USA: Little Rock, Arkansas	Alphacoronavirus	Duvinacovirus	Human coronavirus 229E	27305	Homo sapiens	Homo	sapiens	Humans	2017-02-24	Human coronavirus 229E isolate HCoV-229E/USA/ACRI_0244/2017, complete genome	nasopharyngeal swab	Homo sapiens	tan2023
OM015500.1	USA	Betacoronavirus	Sarbecovirus	Severe acute respiratory syndrome-related coronavirus	29769	Homo sapiens	Homo	sapiens	Humans	2021-12-07	Severe acute respiratory syndrome coronavirus 2 isolate SARS-CoV-2/human/USA/CO-CDPHE-2102387537/2021, complete genome	patient isolate	Homo sapiens	tan2023
MW165327.1	Taiwan	Alphacoronavirus	Pedacovirus	Porcine epidemic diarrhea virus	27908	Sus	Sus		Pigs	2014-01-21	Porcine epidemic diarrhea virus isolate 5-17-O, complete genome	small intestine	suckling pig	tan2023
MT040333.1	China	Betacoronavirus	Sarbecovirus	Pangolin coronavirus	29805	Manis javanica	Manis	javanica	Pangolins	2017-01-01	Pangolin coronavirus isolate PCoV_GX-P4L, complete genome		Manis javanica (Malayan pangolin)	tan2023
JF292919.1	USA: Nashville, TN	Betacoronavirus	Sarbecovirus	Severe acute respiratory syndrome-related coronavirus	29646	Mus musculus	Mus	musculus	Rodents	2008-09-19	SARS coronavirus MA15 isolate d3om4, complete genome		Mus musculus; old	tan2023
DQ415900.1	China: Hong Kong	Betacoronavirus	Embecovirus	Human coronavirus HKU1	29812	Homo	Homo		Humans		Human coronavirus HKU1 strain N23 genotype A, complete genome	nasopharyngeal aspirates of patients diagnosed respiratory tract infection diseases	human coronavirus hku1 strain n23 genotype a, complete genome	tan2023
FJ882960.1	USA: Tennessee	Betacoronavirus	Sarbecovirus	Severe acute respiratory syndrome-related coronavirus	29646					2008-08-06	SARS coronavirus ExoN1 isolate P3pp34, complete genome		sars coronavirus exon1 isolate p3pp34, complete genome	tan2023
KY063616.1	China	Alphacoronavirus	Tegacovirus	Alphacoronavirus 1	29319	Canis	Canis		Canines	2016-07-01	Canine coronavirus isolate HLJ-071, complete genome	feces	dog	tan2023
AY278488.2		Betacoronavirus	Sarbecovirus	Severe acute respiratory syndrome-related coronavirus	29725						SARS coronavirus BJ01, complete genome		sars coronavirus bj01, complete genome	tan2023
KY967359.1	USA	Betacoronavirus	Embecovirus	Betacoronavirus 1	30670	Homo sapiens	Homo	sapiens	Humans	2015-01-01	Human coronavirus OC43 strain HCoV_OC43/Seattle/USA/SC2730/2015, complete genome		Homo sapiens	tan2023
MN520202.1	China: Guangdong	Deltacoronavirus	Buldecovirus	Coronavirus HKU15	25421	Sus	Sus		Pigs	2018-05-01	UNVERIFIED: Porcine deltacoronavirus isolate GD2018-1, complete genome		unverified: porcine deltacoronavirus isolate gd2018-1, complete genome	tan2023
MH002337.1	China	Betacoronavirus	Merbecovirus	Tylonycteris bat coronavirus HKU4	30255	Tylonycteris pachypus	Tylonycteris	pachypus	Bats	2012-11-01	Tylonycteris bat coronavirus HKU4 isolate CZ01, complete genome		Tylonycteris pachypus	tan2023
EF065510.1	China: Guangdong province	Betacoronavirus	Merbecovirus	Pipistrellus bat coronavirus HKU5	30488	Chiroptera			Bats		Bat coronavirus HKU5-2, complete genome		bat	tan2023
HQ890532.1	USA: Nashville, TN	Betacoronavirus	Sarbecovirus	Severe acute respiratory syndrome-related coronavirus	29645	Mus musculus	Mus	musculus	Rodents	2008-10-10	SARS coronavirus MA15 ExoN1 isolate d4ym2, complete genome		Mus musculus; young	tan2023
MH687962.1	Viet Nam	Alphacoronavirus	Unknown	Alphacoronavirus sp.	27752	Scotophilus kuhlii	Scotophilus	kuhlii	Bats	2014-11-13	Alphacoronavirus sp. strain VZ_AlphaCoV_17819_50, complete genome		Scotophilus kuhlii	tan2023
MW854634.1	Taiwan	Deltacoronavirus	Buldecovirus	Coronavirus HKU15	25418	Sus	Sus		Pigs	2015-06-01	Porcine deltacoronavirus isolate 104-553, complete genome	small intestines	pig	tan2023
JF292914.1	USA: Nashville, TN	Betacoronavirus	Sarbecovirus	Severe acute respiratory syndrome-related coronavirus	29646	Mus musculus	Mus	musculus	Rodents	2008-10-10	SARS coronavirus MA15 isolate d4ym4, complete genome		Mus musculus; young	tan2023
LC494157.1	Japan	Betacoronavirus	Embecovirus	Betacoronavirus 1	30953	Bovinae			Bovines	2015-10-01	Bovine coronavirus SHG-4 RNA, complete genome		bovine coronavirus shg-4 rna, complete genome	tan2023
KX034096.1	South Korea	Betacoronavirus	Merbecovirus	Middle East respiratory syndrome-related coronavirus	30082	Homo sapiens	Homo	sapiens	Humans	2015-06-17	Middle East respiratory syndrome coronavirus isolate MERS-CoV/KOR/Seoul/077-2-2015, complete genome	endotracheal aspirate	Homo sapiens	tan2023
NC_014470.1	Bulgaria	Betacoronavirus	Sarbecovirus	Bat coronavirus BM48-31/BGR/2008	29276	Rhinolophus blasii	Rhinolophus	blasii	Bats	2008-01-01	Bat coronavirus BM48-31/BGR/2008, complete genome		Rhinolophus blasii	tan2023
KP981395.1	USA: Illinois	Deltacoronavirus	Buldecovirus	Coronavirus HKU15	25422	Sus	Sus		Pigs		Porcine deltacoronavirus strain USA/IL/2014/026PDV_P11, complete genome		porcine deltacoronavirus strain usa/il/2014/026pdv_p11, complete genome	tan2023
KR265848.1	USA: Minnesota	Deltacoronavirus	Buldecovirus	Coronavirus HKU15	25396	Sus	Sus		Pigs	2014-03-14	Porcine deltacoronavirus strain USA/Minnesota214/2014, complete genome		pig	tan2023
GQ427174.1	USA	Gammacoronavirus	Igacovirus	Avian coronavirus	27650	Aves			Birds	2001-01-01	Turkey coronavirus strain TCoV/TX-GL/01, complete genome		turkey	tan2023
KY684760.1	USA	Alphacoronavirus	Duvinacovirus	Human coronavirus 229E	27249	Homo sapiens	Homo	sapiens	Humans	2016-01-01	Human coronavirus 229E strain HCoV_229E/Seattle/USA/SC2282/2017, complete genome		Homo sapiens	tan2023
EF065515.1	China: Guangdong province	Betacoronavirus	Nobecovirus	Rousettus bat coronavirus HKU9	29136	Chiroptera			Bats		Bat coronavirus HKU9-3, complete genome		bat	tan2023
MZ081396.1	China	Alphacoronavirus	Unknown	Alphacoronavirus sp.	27951	Hipposideros larvatus	Hipposideros	larvatus	Bats	2020-05-25	Alphacoronavirus sp. strain bat/Yunnan/HlYN18/2020, complete genome	bat feces	Hipposideros larvatus	tan2023
KY065120.1	China: Tianjin	Deltacoronavirus	Buldecovirus	Coronavirus HKU15	25413	Sus	Sus		Pigs	2016-01-01	Porcine deltacoronavirus strain CHN/Tianjin/2016, complete genome	fecal samples	porcine	tan2023
LC494150.1	Japan	Betacoronavirus	Embecovirus	Betacoronavirus 1	30954	Bovinae			Bovines	2017-01-01	Bovine coronavirus IWT-24 RNA, complete genome		bovine coronavirus iwt-24 rna, complete genome	tan2023
MN173782.1	China	Deltacoronavirus	Buldecovirus	Coronavirus HKU15	25406	Sus	Sus		Pigs	2018-01-01	Porcine deltacoronavirus isolate CHN-GX09-2018, complete genome		porcine deltacoronavirus isolate chn-gx09-2018, complete genome	tan2023
AB551247.1	Australia:Melbourne	Betacoronavirus	Embecovirus	Murine coronavirus	31428	Mus musculus	Mus	musculus	Rodents	1994-01-01	Murine hepatitis virus RNA, complete genome, strain: MHV-MI		Mus musculus, severe combined immunedeficiency (SCID), female, 6-8 weeks old, liver, sample ID: E4M31	tan2023
KR265865.1	USA: Iowa	Deltacoronavirus	Buldecovirus	Coronavirus HKU15	25394	Sus	Sus		Pigs	2014-06-05	Porcine deltacoronavirus strain USA/Iowa459/2014, complete genome		pig	tan2023
MG197713.1	China	Betacoronavirus	Embecovirus	Betacoronavirus 1	30495	Homo	Homo		Humans	2015-08-14	Human coronavirus OC43 strain BJ-221, complete genome	throat swabs or nasopharyngeal aspirates	human coronavirus oc43 strain bj-221, complete genome	tan2023
KU981062.1	China	Deltacoronavirus	Buldecovirus	Coronavirus HKU15	25420	Sus	Sus		Pigs	2015-12-30	Porcine deltacoronavirus strain NH isolate passage 10, complete genome	small intestinal contents	porcine deltacoronavirus strain nh isolate passage 10, complete genome	tan2023
MF769441.1	China	Alphacoronavirus	Rhinacovirus	Swine acute diarrhea syndrome coronavirus	27173	Sus	Sus		Pigs	2017-01-01	Swine acute diarrhea syndrome coronavirus isolate 82, complete genome		swine	tan2023
KY369906.1	USA	Betacoronavirus	Embecovirus	Betacoronavirus 1	30689	Homo sapiens	Homo	sapiens	Humans	2016-01-01	Human coronavirus OC43 strain HCoV_OC43/Seattle/USA/SC622/2016, complete genome		Homo sapiens	tan2023
MN507638.1	Qatar	Betacoronavirus	Merbecovirus	Middle East respiratory syndrome-related coronavirus	30033	Lama glama	Lama	glama	Camelids		Middle East respiratory syndrome-related coronavirus isolate llama-passaged-Qatar15, complete genome	nasal swab	Lama glama	tan2023
OM830321.1	USA	Alphacoronavirus	Tegacovirus	Alphacoronavirus 1	27546	Sus	Sus		Pigs	1990-06-01	Porcine respiratory coronavirus ISU-1, complete genome		porcine	tan2023
[truncated: 386 more rows]

## Sheet: S3_RBD
accession	geo_location	viral_genus	viral_subgenus	viral_species	length	host	host_genus	host_species	common_name	collection_date	genbank_title	isolation_source	host_meta	virus_name	lineage	clade	receptor	study	source	comment
[truncated: 89 more rows]

[truncated: 1 more sheets: S4_microarray]
